# Supplementary material for: Oxidative radical cascade cyclization involving C(sp3)–C(sp3), C(sp3)–C(sp2) and C(sp2)–N bonds formation: direct construction of cyano and methyl substituted polyheterocycles
Source: Royal Society of Chemistry journal article supplement (doi:10.1039/c8qo00336j), 2018-01-01

## Supporting Information

### **Oxidative radical cascade cyclization involving C(sp<sup>3</sup>)-C(sp<sup>3</sup>), C(sp<sup>3</sup>)-C(sp<sup>2</sup>) and C(sp<sup>2</sup>)-N bonds formation: direct construction of cyano and methyl substituted polyheterocycles**

Jia-Qi Shang, Shi-Sheng Wang, Hong Fu, Yi Li, Tao Yang, and Ya-Min Li\*

*Faculty of Life Science and Technology, Kunming University of Science and Technology, Kunming 650500, P. R. China.*

*E-mail: liym@kmust.edu.cn.*

#### Table of Contents

|                                                                                                   |     |
|---------------------------------------------------------------------------------------------------|-----|
| 1. General information                                                                            | S2  |
| 2. Typical procedures for the synthesis of substrates                                             | S3  |
| 3. Screening of the reaction conditions                                                           | S4  |
| 4. General procedure for synthesis of cyano substituted pyrido[4,3,2- <i>gh</i> ]phenanthridinds  | S5  |
| 5. General procedure for synthesis of methyl substituted pyrido[4,3,2- <i>gh</i> ]phenanthridinds | S5  |
| 6. Kinetic isotope effect (KIE) experiments                                                       | S6  |
| 7. Characterization of compounds                                                                  | S8  |
| 8. Charts of compounds                                                                            | S30 |

## 1. General information

<sup>1</sup>H NMR, <sup>13</sup>C NMR and spectra were recorded on Bruker AVANCE DRX 500 (500 MHz for <sup>1</sup>H; 126 MHz for <sup>13</sup>C) and Bruker AVANCE III HD 600 (600 MHz for <sup>1</sup>H; 151 MHz for <sup>13</sup>C) instruments internally referenced to tetramethylsilane (TMS) signal. Chemical shifts ( $\delta$ ) and coupling constants ( $J$ ) were expressed in ppm and Hz, respectively. CDCl<sub>3</sub> was used as the NMR solvent in all cases. Mass spectra were measured using Thermo LTQ Orbitrap XL spectrometer. IR spectra were recorded on a Bruker Tensor 27 FT-IR spectrometer and only major peaks are reported in cm<sup>-1</sup>. Unless otherwise noted, materials were obtained from commercial suppliers and used without further purification. Column chromatography was carried out on silica gel (particle size 200-300 mesh ASTM).

## 2. Typical procedures for the synthesis of substrates

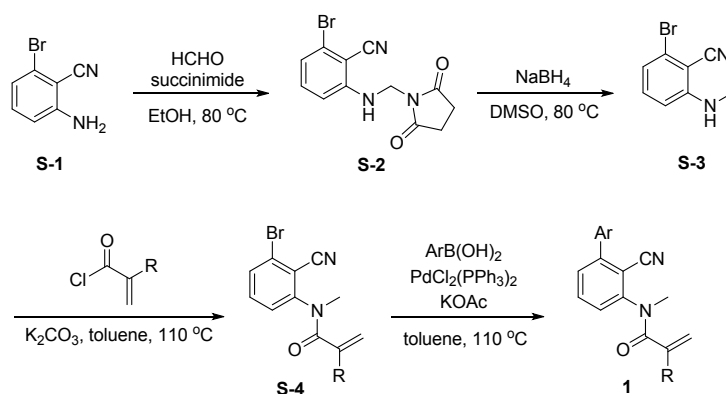

To the solution of anthranilonitrile **S-1** (15.0 mmol, 2.94 g) in 16 mL EtOH were added formaldehyde solution (37%, 2 equiv, 30.0 mmol, 2.2 mL) and succinimide (2 equiv, 2.85 g, 30 mmol). The mixture was allowed to reflux with stirring. After completion of the reaction, the solution was cooled to room temperature and further cooled in an ice bath. Succinimide derivative **S-2** was collected by vacuum filtration, washed several times with cold ethanol, dried and was used without further purification.

To the solution of **S-2** in 16 mL dry DMSO was slowly added NaBH<sub>4</sub> (1.1 equiv, 0.63 g, 16.5 mmol) at 0 °C under argon. The mixture was allowed to stir at 80 °C. After completion of the reaction, the solution was cooled to room temperature and poured into cold water. The mixture was extracted with diethyl ether and the extract was dried over Na<sub>2</sub>SO<sub>4</sub>. Concentration under reduced pressure to afford aniline **S-3** without any further purification.

To a stirred solution of aniline **S-3** (7.0 mmol) in 35 mL dry toluene were added anhydrous K<sub>2</sub>CO<sub>3</sub> (14.0 mmol) and acyl chloride (10.5 mmol). The mixture was heated to 110 °C under argon atmosphere for 12 h. After completion, the reaction was quenched with H<sub>2</sub>O and extracted with EtOAc. The extract was washed with brine and dried over MgSO<sub>4</sub>. Concentration under reduced pressure and purification by silica gel flash chromatography to afford the amide **S-4**.

Amide **S-4** (4.0 mmol), phenylboronic acid (6.0 mmol), PdCl<sub>2</sub>(PPh<sub>3</sub>)<sub>2</sub> (0.12 mmol) and KOAc (8 mmol) were added in 30 mL toluene. The reaction mixture was stirred at 110 °C under argon atmosphere for 12 h. After completion of the reaction, the resulting solution was cooled to room temperature and diluted with EtOAc. The solution was washed with water (three times) and saturated brine, and the organic layers were dried over Na<sub>2</sub>SO<sub>4</sub>, filtered. Concentration under reduced pressure and purification by silica gel flash chromatography to afford the desired substrates **1**. [**1o**, **1u** and **1v**: Amide **S-4** (4 mmol), phenylboronic acid (4.8 mmol), PdCl<sub>2</sub>(PPh<sub>3</sub>)<sub>2</sub> (0.12 mmol) and Cs<sub>2</sub>CO<sub>3</sub> (10 mmol) were added in CH<sub>3</sub>CN (40 mL) and H<sub>2</sub>O (2 mL). The reaction mixture was stirred at 80 °C under argon atmosphere for 12 h. After completion of the reaction, the resulting solution was cooled to room temperature and extracted with EtOAc. The combined organic layers were washed with brine, dried over anhydrous Na<sub>2</sub>SO<sub>4</sub>, filtered and concentrated under reduced pressure. The residue was purified by column chromatography to give the desired substrates **1**.]

### 3. Screening of the reaction conditions

**Table S1.** Reaction conditions screening<sup>a</sup>

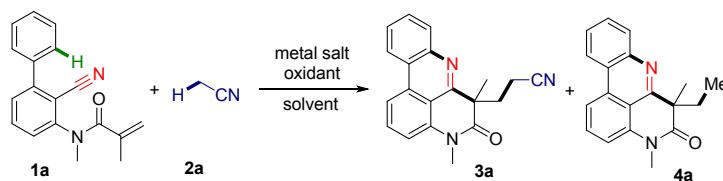

| Entry           | Metal salt (mol %)                        | Oxidant (equiv)                                    | Solvent (mL)            | Temp (°C) | Yield of <b>3a</b> <sup>b</sup> (%) | <b>3a/4a</b> <sup>c</sup> |
|-----------------|-------------------------------------------|----------------------------------------------------|-------------------------|-----------|-------------------------------------|---------------------------|
| 1               | CuCl (10)                                 | DTBP (3.0)                                         | CH <sub>3</sub> CN (4)  | 120       | 22                                  | 2.1/1                     |
| 2               | CuCl (10)                                 | TBHP (3.0)                                         | CH <sub>3</sub> CN (4)  | 120       | 0                                   |                           |
| 3               | CuCl (10)                                 | TBPB (3.0)                                         | CH <sub>3</sub> CN (4)  | 120       | 59                                  | 3.8/1                     |
| 4               | CuCl (10)                                 | DCP (3.0)                                          | CH <sub>3</sub> CN (4)  | 120       | 56                                  | 1.5/1                     |
| 5               | CuCl (10)                                 | BPO (3.0)                                          | CH <sub>3</sub> CN (4)  | 120       | 51                                  | 1.0/0                     |
| 6               | CuCl (10)                                 | K <sub>2</sub> S <sub>2</sub> O <sub>8</sub> (3.0) | CH <sub>3</sub> CN (4)  | 120       | 0                                   |                           |
| 7               | CuCl (10)                                 | Oxone (3.0)                                        | CH <sub>3</sub> CN (4)  | 120       | 0                                   |                           |
| 8               | CuBr (10)                                 | TBPB (3.0)                                         | CH <sub>3</sub> CN (4)  | 120       | 51                                  | 4.6/1                     |
| 9               | CuI (10)                                  | TBPB (3.0)                                         | CH <sub>3</sub> CN (4)  | 120       | 52                                  | 5.3/1                     |
| 10              | Cu <sub>2</sub> O (10)                    | TBPB (3.0)                                         | CH <sub>3</sub> CN (4)  | 120       | 59                                  | 2.9/1                     |
| 11              | CuCl <sub>2</sub> (10)                    | TBPB (3.0)                                         | CH <sub>3</sub> CN (4)  | 120       | 62                                  | 3.0/1                     |
| 12              | CuBr <sub>2</sub> (10)                    | TBPB (3.0)                                         | CH <sub>3</sub> CN (4)  | 120       | 52                                  | 5.0/1                     |
| 13              | CuO (10)                                  | TBPB (3.0)                                         | CH <sub>3</sub> CN (4)  | 120       | 44                                  | 5.9/1                     |
| 14              | Cu(OAc) <sub>2</sub> (10)                 | TBPB (3.0)                                         | CH <sub>3</sub> CN (4)  | 120       | 63                                  | 4.7/1                     |
| 15              | Cu(acac) <sub>2</sub> (10)                | TBPB (3.0)                                         | CH <sub>3</sub> CN (4)  | 120       | 60                                  | 4.5/1                     |
| 16              | CuSO <sub>4</sub> ·5H <sub>2</sub> O (10) | TBPB (3.0)                                         | CH <sub>3</sub> CN (4)  | 120       | 33                                  | 2.8/1                     |
| 17              | Cu(OTf) <sub>2</sub> (10)                 | TBPB (3.0)                                         | CH <sub>3</sub> CN (4)  | 120       | 57                                  | 6.0/1                     |
| 18              | FeCl <sub>3</sub> (10)                    | TBPB (3.0)                                         | CH <sub>3</sub> CN (4)  | 120       | 37                                  | 2.9/1                     |
| 19              | Fe(OTf) <sub>2</sub> (10)                 | TBPB (3.0)                                         | CH <sub>3</sub> CN (4)  | 120       | 29                                  | 3.4/1                     |
| 20              | IrCl <sub>3</sub> (10)                    | TBPB (3.0)                                         | CH <sub>3</sub> CN (4)  | 120       | 40                                  | 4.5/1                     |
| 21              | Cu(OAc) <sub>2</sub> (10)                 | TBPB (3.0)                                         | CH <sub>3</sub> CN (6)  | 120       | 65                                  | 6.6/1                     |
| 22              | Cu(OAc) <sub>2</sub> (10)                 | TBPB (3.0)                                         | CH <sub>3</sub> CN (8)  | 120       | 71                                  | 9.0/1                     |
| 23              | Cu(OAc) <sub>2</sub> (10)                 | TBPB (3.0)                                         | CH <sub>3</sub> CN (10) | 120       | 60                                  | 9.4/1                     |
| 24              | Cu(OAc) <sub>2</sub> (10)                 | TBPB (2.0)                                         | CH <sub>3</sub> CN (8)  | 120       | 75                                  | 7.8:1                     |
| 25              | Cu(OAc) <sub>2</sub> (10)                 | TBPB (1.0)                                         | CH <sub>3</sub> CN (8)  | 120       | 43                                  | 3.8/1                     |
| 26              | Cu(OAc) <sub>2</sub> (5)                  | TBPB (2.0)                                         | CH <sub>3</sub> CN (8)  | 120       | 70                                  | 7.4/1                     |
| 27              | Cu(OAc) <sub>2</sub> (15)                 | TBPB (2.0)                                         | CH <sub>3</sub> CN (8)  | 120       | 67                                  | 6.0/1                     |
| 28              | Cu(OAc) <sub>2</sub> (10)                 |                                                    | CH <sub>3</sub> CN (8)  | 120       | 0                                   |                           |
| 29              |                                           | TBPB (2.0)                                         | CH <sub>3</sub> CN (8)  | 120       | 54                                  | 10.1/1                    |
| 30              | Cu(OAc) <sub>2</sub> (10)                 | TBPB (2.0)                                         | CH <sub>3</sub> CN (8)  | 110       | 51                                  | 7.0/1                     |
| 31 <sup>d</sup> | Cu(OAc) <sub>2</sub> (10)                 | TBPB (2.0)                                         | CH <sub>3</sub> CN (8)  | 120       | 47                                  | 7.1/1                     |

<sup>a</sup>Reaction conditions: **1a** (0.2 mmol), **2a**, metal salt, and oxidant in solvent for 12 h under Ar. <sup>b</sup>Isolated yield.

<sup>c</sup>Determined by <sup>1</sup>H NMR of the crude products. <sup>d</sup>Under air.



**Table S2.** Optimization of the reaction conditions<sup>a</sup>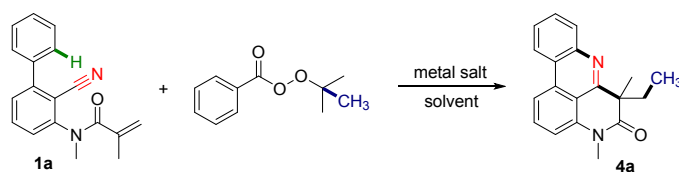

| Entry           | Methyl source (equiv) | Metal salt (mol %)        | Solvent (mL)  | Temp (°C) | Yield <sup>b</sup> (%) |
|-----------------|-----------------------|---------------------------|---------------|-----------|------------------------|
| 1               | TBPB (2.0)            | Cu(OAc) <sub>2</sub> (10) | PhCl (2.0)    | 120       | 34                     |
| 2               | TBPB (2.0)            |                           | PhCl (2.0)    | 120       | 67                     |
| 3               | TBPB (1.0)            |                           | PhCl (2.0)    | 120       | 48                     |
| 4               | TBPB (3.0)            |                           | PhCl (2.0)    | 120       | 72                     |
| 5               | TBPB (4.0)            |                           | PhCl (2.0)    | 120       | 78                     |
| 6               | TBPB (5.0)            |                           | PhCl (2.0)    | 120       | 74                     |
| 7               | TBPB (4.0)            |                           | PhCl (1.0)    | 120       | 73                     |
| 8               | TBPB (4.0)            |                           | PhCl (3.0)    | 120       | 76                     |
| 9               | TBPB (4.0)            |                           | PhCl (2.0)    | 100       | 78                     |
| 10              | TBPB (4.0)            |                           | PhCl (2.0)    | 80        | 37                     |
| 11              | DTBP (4.0)            |                           | PhCl (2.0)    | 100       | 10                     |
| 12              | DCP (4.0)             |                           | PhCl (2.0)    | 100       | 47                     |
| 13              | TBPB (4.0)            |                           | DMSO (2.0)    | 100       | 38                     |
| 14              | TBPB (4.0)            |                           | DMF (2.0)     | 100       | 18                     |
| 15              | TBPB (4.0)            |                           | toluene (2.0) | 100       | 15                     |
| 16 <sup>c</sup> | TBPB (4.0)            |                           | PhCl (2.0)    | 100       | 17                     |

<sup>a</sup>Reaction conditions: **1a** (0.2 mmol), methyl source in solvent for 12 h under Ar. <sup>b</sup>Isolated yield. <sup>c</sup>Under air.

#### 4. General procedure for synthesis of cyano substituted pyrido[4,3,2-*gh*]phenanthridins

In a Schlenk tube, acrylamide **1** (0.2 mmol), Cu(OAc)<sub>2</sub> (0.02 mmol), and TBPB (0.4 mmol) were added and charged with argon three times. Then, CH<sub>3</sub>CN (8 mL) were added. The mixture was allowed to stir at 120 °C for 12 hours. After substrate was consumed, the reaction was cooled to room temperature and filtering through a bed of Celite. The filtered reaction mixture was concentrated by rotary evaporation and purified by flash chromatography on silica gel with petroleum ether/ethyl acetate as the eluent to afford the corresponding product **3**.

#### 5. General procedure for synthesis of methyl substituted pyrido[4,3,2-*gh*]phenanthridins

In a Schlenk tube, acrylamide **1** (0.2 mmol) and TBPB (0.8 mmol) were added and charged with argon three times. Then, PhCl (2 mL) were added. The mixture was allowed to stir at 100 °C for 12 hours. After substrate was

consumed, the reaction was cooled to room temperature and filtering through a bed of Celite. The filtered reaction mixture was concentrated by rotary evaporation and purified by flash chromatography on silica gel with petroleum ether/ethyl acetate as the eluent to afford the corresponding product **4**.

## 6. Kinetic isotope effect (KIE) experiments

### a) Intermolecular KIE experiment

In a Schlenk tube, acrylamide **1a** (0.1 mmol, 27.6 mg), **1a-D<sub>5</sub>** (0.1 mmol, 28.1 mg), Cu(OAc)<sub>2</sub> (0.02 mmol, 3.6 mg), and TBPB (0.4 mmol, 77.7 mg) were added and charged with argon three times. Then, CH<sub>3</sub>CN (8 mL) were added. The mixture was allowed to stir at 120 °C for 0.5 hour. The reaction was cooled to room temperature and filtering through a bed of Celite. The filtered reaction mixture was concentrated by rotary evaporation and purified by flash chromatography on silica gel with petroleum ether/ethyl acetate as the eluent to afford the corresponding product **3** and **3a-D<sub>4</sub>**. The products were under <sup>1</sup>H-NMR analysis (Figure S1).

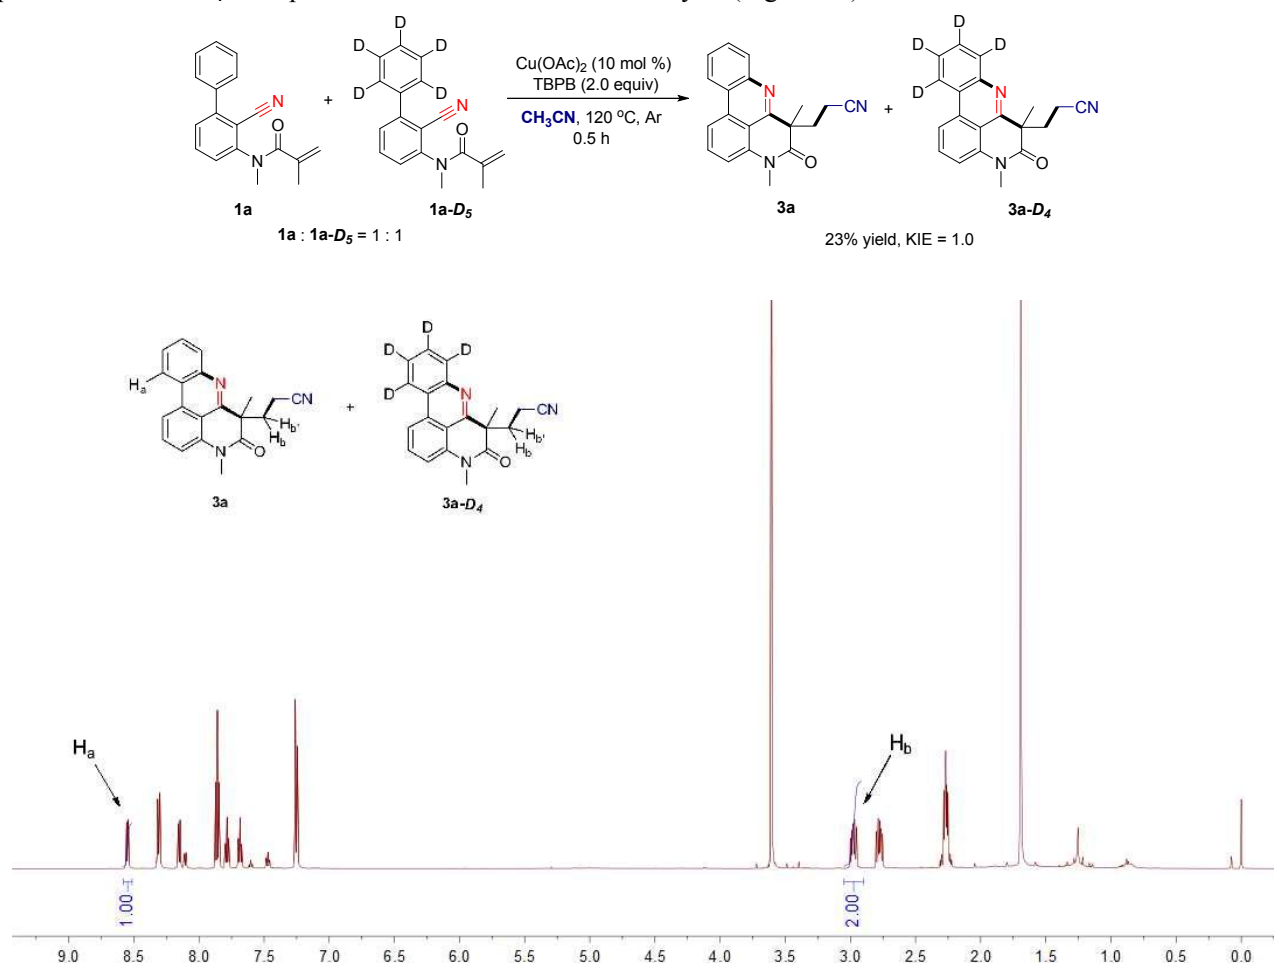

Figure S1. <sup>1</sup>H NMR spectra of the mixture of compound **3a** and **3a-D<sub>4</sub>**.

### b) Intramolecular KIE experiment

In a Schlenk tube, acrylamide **1a-D<sub>1</sub>** (0.2 mmol, 55.5 mg), Cu(OAc)<sub>2</sub> (0.02 mmol, 3.6 mg), and TBPB (0.4 mmol,

77.7 mg) were added and charged with argon three times. Then, CH<sub>3</sub>CN (8 mL) were added. The mixture was allowed to stir at 120 °C for 12 hours. After substrate was consumed, the reaction was cooled to room temperature and filtering through a bed of Celite. The filtered reaction mixture was concentrated by rotary evaporation and purified by flash chromatography on silica gel with petroleum ether/ethyl acetate as the eluent to afford the corresponding product **3** and **3a-D<sub>1</sub>**. The products were under <sup>1</sup>H-NMR analysis (Figure S2).

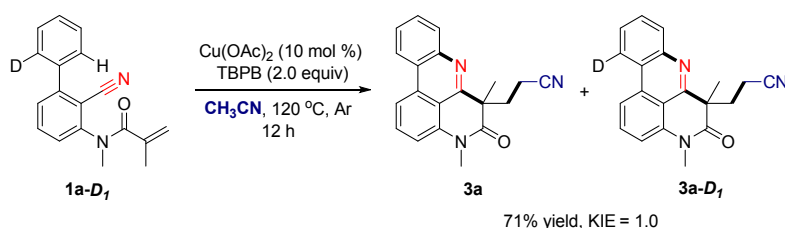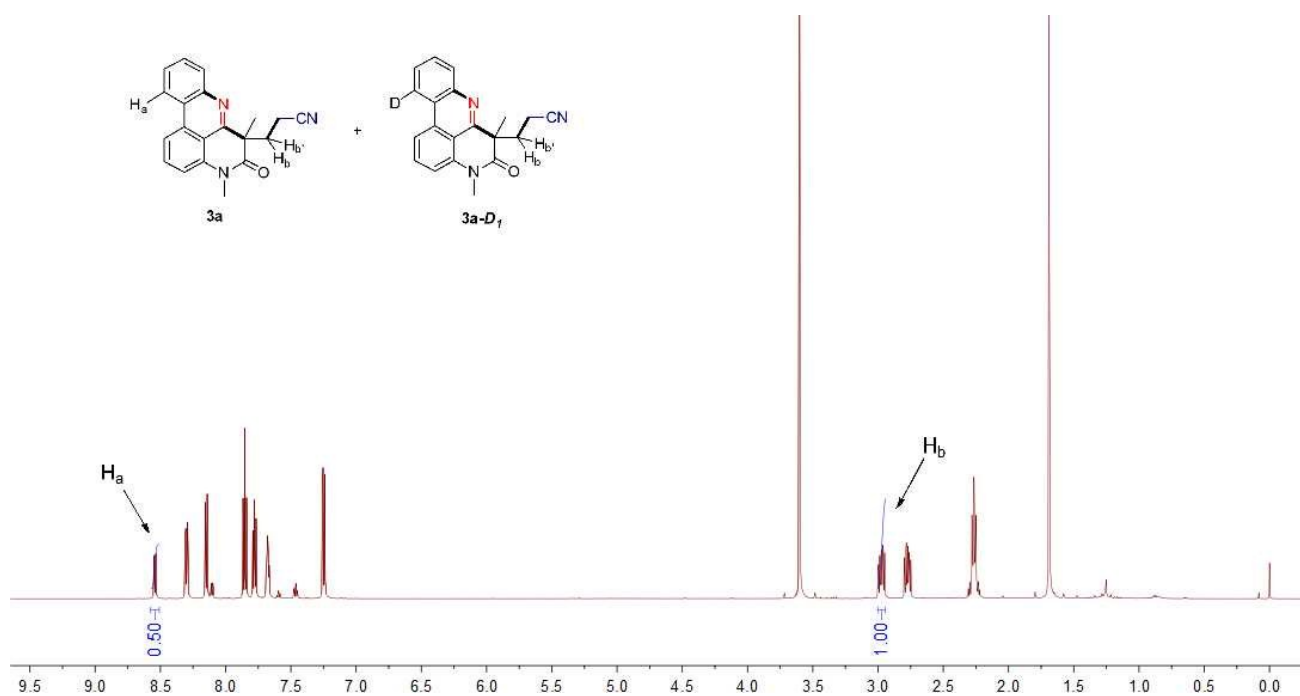

**Figure S2.** <sup>1</sup>H NMR spectra of the mixture of compound **3a** and **3a-D<sub>1</sub>**.

### c) The KIE studies on solvent

In a Schlenk tube, acrylamide **1a** (0.2 mmol, 55.3 mg), Cu(OAc)<sub>2</sub> (0.02 mmol, 3.6 mg), and TBPB (0.4 mmol, 77.7 mg) were added and charged with argon three times. Then, CH<sub>3</sub>CN (4 mL) and CD<sub>3</sub>CN (4 mL) were added. The mixture was allowed to stir at 120 °C for 12 hours. After substrate was consumed, the reaction was cooled to room temperature and filtering through a bed of Celite. The filtered reaction mixture was concentrated by rotary evaporation and purified by flash chromatography on silica gel with petroleum ether/ethyl acetate as the eluent to afford the corresponding product **3** and **3a-D<sub>2</sub>**. The products were under <sup>1</sup>H-NMR analysis (Figure S3).

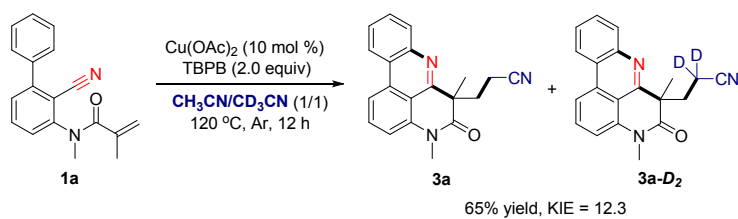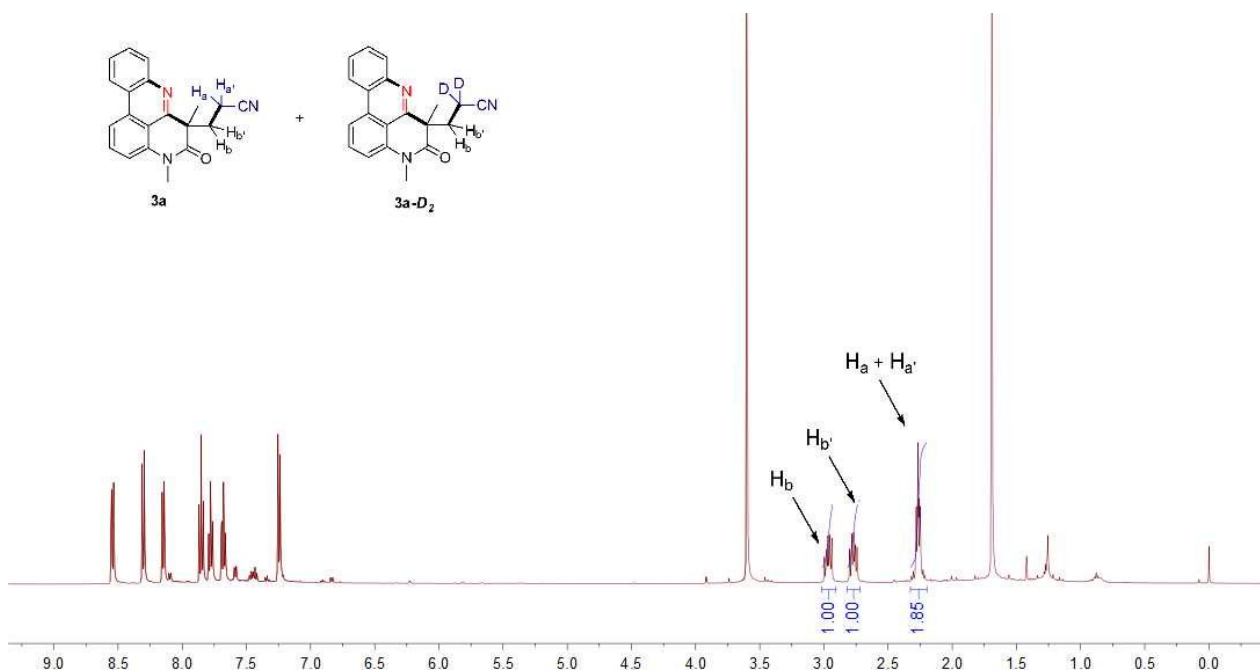

**Figure S3.**  $^1\text{H}$  NMR spectra of the mixture of compound **3a** and **3a- $D_2$** .

## 7. Characterization of compounds

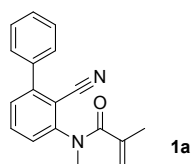

***N*-(2-cyano-[1,1'-biphenyl]-3-yl)-*N*-methylmethacrylamide.** Purified by column chromatography (petroleum ether : ethyl acetate = 4 : 1). Yellow solid, mp 118–119 °C.  $^1\text{H}$  NMR (600 MHz,  $\text{CDCl}_3$ )  $\delta$  7.64 (t,  $J = 7.9$  Hz, 1H), 7.55 (d,  $J = 7.9$  Hz, 2H), 7.52–7.42 (m, 4H), 7.27 (d,  $J = 7.6$  Hz, 1H), 5.15 (s, 1H), 5.09 (s, 1H), 3.43 (s, 3H), 1.93 (s, 3H).  $^{13}\text{C}$  NMR (151 MHz,  $\text{CDCl}_3$ )  $\delta$  171.5, 148.3, 147.2, 139.9, 137.2, 133.3, 128.9, 128.7, 128.57, 128.55, 127.0, 119.3, 115.7, 110.8, 37.5, 19.9. IR (film)  $\nu$  2225, 1660, 1628, 1565, 1460, 1358, 1231, 1093, 925, 770, 707  $\text{cm}^{-1}$ . HRMS (ESI): calc. for  $\text{C}_{18}\text{H}_{16}\text{N}_2\text{O}$  ( $\text{M}+\text{H}$ ) $^+$ , 277.1335; found, 277.1341.

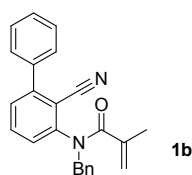

***N*-benzyl-*N*-(2-cyano-[1,1'-biphenyl]-3-yl)methacrylamide.** Purified by column chromatography (petroleum ether : ethyl acetate = 4 : 1). White solid, mp 82–83 °C. <sup>1</sup>H NMR (600 MHz, CDCl<sub>3</sub>) δ 7.55–7.40 (m, 6H), 7.37 (dd, *J* = 7.8, 1.0 Hz, 1H), 7.30–7.14 (m, 5H), 6.94 (d, *J* = 7.6 Hz, 1H), 5.49 (s, 1H), 5.14 (s, 1H), 5.08 (s, 1H), 4.69 (s, 1H), 1.95 (s, 3H). <sup>13</sup>C NMR (151 MHz, CDCl<sub>3</sub>) δ 171.2, 147.2, 146.3, 140.1, 137.3, 136.2, 132.8, 129.0, 128.9, 128.68, 128.65, 128.5, 128.3, 127.8, 119.8, 116.0, 111.6, 52.7, 20.2. IR (film) ν 3062, 2221, 1653, 1629, 1471, 1434, 1388, 1337, 1223, 764, 698 cm<sup>-1</sup>. HRMS (ESI): calc. for C<sub>24</sub>H<sub>20</sub>N<sub>2</sub>O (M+H)<sup>+</sup>, 353.1648; found, 353.1654.

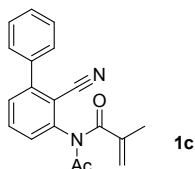

***N*-acetyl-*N*-(2-cyano-[1,1'-biphenyl]-3-yl)methacrylamide.** Purified by column chromatography (petroleum ether : ethyl acetate = 3 : 1). Yellow oil. <sup>1</sup>H NMR (500 MHz, CDCl<sub>3</sub>) δ 7.67 (t, *J* = 7.9 Hz, 1H), 7.58–7.43 (m, 6H), 7.21 (dd, *J* = 7.9, 1.0 Hz, 1H), 5.64 (s, 1H), 5.41 (d, *J* = 1.5 Hz, 1H), 2.45 (s, 3H), 1.97 (s, 3H). <sup>13</sup>C NMR (126 MHz, CDCl<sub>3</sub>) δ 172.84, 172.82, 147.4, 142.8, 140.6, 137.2, 133.2, 129.9, 129.1, 128.8, 128.7, 128.1, 122.3, 115.6, 112.2, 25.7, 19.1. IR (film) ν 2923, 2223, 1714, 1637, 1536, 1468, 1272, 1000, 803, 755, 698 cm<sup>-1</sup>. HRMS (ESI): calc. for C<sub>19</sub>H<sub>16</sub>N<sub>2</sub>O<sub>2</sub> (M+H)<sup>+</sup>, 305.1285; found, 305.1290.

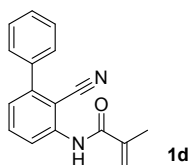

***N*-(2-cyano-[1,1'-biphenyl]-3-yl)methacrylamide.** Purified by column chromatography (petroleum ether : ethyl acetate = 6 : 1). White solid, mp 96–97 °C. <sup>1</sup>H NMR (500 MHz, CDCl<sub>3</sub>) δ 8.52 (dd, *J* = 8.5, 0.7 Hz, 1H), 8.27 (s, 1H), 7.63 (t, *J* = 8.1 Hz, 1H), 7.58–7.40 (m, 5H), 7.23 (dd, *J* = 7.7, 0.9 Hz, 1H), 5.98 (d, *J* = 0.5 Hz, 1H), 5.59 (dd, *J* = 2.9, 1.4 Hz, 1H), 2.12 (s, 3H). <sup>13</sup>C NMR (126 MHz, CDCl<sub>3</sub>) δ 166.3, 145.8, 141.4, 139.9, 138.0, 133.7, 128.9, 128.8, 128.6, 124.9, 121.7, 119.2, 116.2, 101.1, 18.5. IR (film) ν 3058, 2926, 2208, 1694, 1522, 1465, 1293, 1162, 805, 760, 700 cm<sup>-1</sup>. HRMS (ESI): calc. for C<sub>17</sub>H<sub>14</sub>N<sub>2</sub>O (M+H)<sup>+</sup>, 263.1179; found, 263.1163.

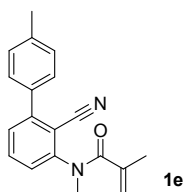

***N*-(2-cyano-4'-methyl-[1,1'-biphenyl]-3-yl)-*N*-methylmethacrylamide.** Purified by column chromatography (petroleum ether : ethyl acetate = 4 : 1). White solid, mp 116–118 °C. <sup>1</sup>H NMR (600 MHz, CDCl<sub>3</sub>) δ 7.62 (t, *J* = 7.9 Hz, 1H), 7.50–7.39 (m, 3H), 7.30 (d, *J* = 8.1 Hz, 2H), 7.23 (d, *J* = 7.5 Hz, 1H), 5.14 (s, 1H), 5.09 (s, 1H), 3.43 (s,

3H), 2.41 (s, 3H), 1.92 (s, 3H).  $^{13}\text{C}$  NMR (151 MHz,  $\text{CDCl}_3$ )  $\delta$  171.7, 148.4, 147.4, 139.9, 139.0, 134.4, 133.3, 129.4, 128.7, 128.5, 126.8, 119.6, 115.9, 110.7, 37.4, 21.1, 20.0. IR (film)  $\nu$  2976, 2220, 1655, 1627, 1464, 1362, 1230, 1090, 1046, 946, 810  $\text{cm}^{-1}$ . HRMS (ESI): calc. for  $\text{C}_{19}\text{H}_{18}\text{N}_2\text{O}$  ( $\text{M}+\text{H}$ ) $^+$ , 291.1492; found, 291.1498.

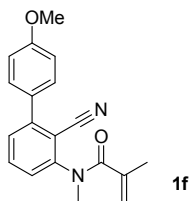

***N*-(2-cyano-4'-methoxy-[1,1'-biphenyl]-3-yl)-*N*-methylmethacrylamide.** Purified by column chromatography (petroleum ether : ethyl acetate = 3 : 1). Yellow solid, mp 102–104 °C.  $^1\text{H}$  NMR (600 MHz,  $\text{CDCl}_3$ )  $\delta$  7.61 (t,  $J$  = 7.9 Hz, 1H), 7.55–7.46 (m, 2H), 7.43 (dd,  $J$  = 7.9, 1.0 Hz, 1H), 7.21 (d,  $J$  = 7.5 Hz, 1H), 7.06–6.96 (m, 2H), 5.14 (s, 1H), 5.09 (s, 1H), 3.86 (s, 3H), 3.43 (s, 3H), 1.92 (s, 3H).  $^{13}\text{C}$  NMR (151 MHz,  $\text{CDCl}_3$ )  $\delta$  171.7, 160.2, 148.5, 147.0, 140.0, 133.3, 130.0, 129.6, 128.6, 126.5, 119.6, 116.1, 114.1, 110.6, 55.3, 37.4, 20.1. IR (film)  $\nu$  2919, 2222, 1668, 1612, 1518, 1464, 1258, 1191, 927, 836, 752  $\text{cm}^{-1}$ . HRMS (ESI): calc. for  $\text{C}_{19}\text{H}_{18}\text{N}_2\text{O}_2$  ( $\text{M}+\text{H}$ ) $^+$ , 307.1441; found, 307.1446.

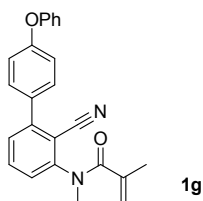

***N*-(2-cyano-4'-phenoxy-[1,1'-biphenyl]-3-yl)-*N*-methylmethacrylamide.** Purified by column chromatography (petroleum ether : ethyl acetate = 4 : 1). White solid, mp 99–100 °C.  $^1\text{H}$  NMR (600 MHz,  $\text{CDCl}_3$ )  $\delta$  7.63 (t,  $J$  = 7.9 Hz, 1H), 7.55–7.48 (m, 2H), 7.44 (dd,  $J$  = 7.9, 1.0 Hz, 1H), 7.41–7.34 (m, 2H), 7.24 (d,  $J$  = 7.7 Hz, 1H), 7.19–7.13 (m, 1H), 7.12–7.02 (m, 4H), 5.15 (s, 1H), 5.09 (s, 1H), 3.43 (s, 3H), 1.93 (s, 3H).  $^{13}\text{C}$  NMR (151 MHz,  $\text{CDCl}_3$ )  $\delta$  171.6, 158.4, 156.0, 148.4, 146.6, 139.9, 133.4, 131.7, 130.2, 129.8, 128.7, 126.8, 123.9, 119.7, 119.5, 118.2, 115.9, 110.6, 37.5, 20.0. IR (film)  $\nu$  3068, 2224, 1653, 1589, 1472, 1361, 1249, 1153, 781, 753  $\text{cm}^{-1}$ . HRMS (ESI): calc. for  $\text{C}_{24}\text{H}_{20}\text{N}_2\text{O}_2$  ( $\text{M}+\text{H}$ ) $^+$ , 369.1598; found, 369.1614.

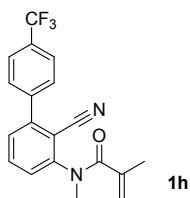

***N*-(2-cyano-4'-(trifluoromethyl)-[1,1'-biphenyl]-3-yl)-*N*-methylmethacrylamide.** Purified by column chromatography (petroleum ether : ethyl acetate = 4 : 1). Yellow solid, mp 110–111 °C.  $^1\text{H}$  NMR (600 MHz,  $\text{CDCl}_3$ )  $\delta$  7.77 (d,  $J$  = 8.3 Hz, 2H), 7.72 (t,  $J$  = 7.9 Hz, 1H), 7.69 (d,  $J$  = 8.1 Hz, 2H), 7.48 (dd,  $J$  = 7.8, 1.0 Hz, 1H), 7.36 (d,

$J = 7.9$  Hz, 1H), 5.19 (s, 1H), 5.10 (s, 1H), 3.45 (s, 3H), 1.95 (s, 3H).  $^{13}\text{C}$  NMR (151 MHz,  $\text{CDCl}_3$ )  $\delta$  171.6, 148.5, 145.6, 140.8, 139.8, 133.7, 130.9 (q,  $J_{\text{C-F}} = 32.7$  Hz), 129.1, 128.7, 127.8, 125.6 (q,  $J_{\text{C-F}} = 3.6$  Hz), 123.8 (q,  $J_{\text{C-F}} = 273.3$  Hz), 115.4, 110.9, 37.6, 19.9. IR (film)  $\nu$  3063, 2223, 1655, 1624, 1324, 1178, 1121, 1065, 917, 849, 821  $\text{cm}^{-1}$ . HRMS (ESI): calc. for  $\text{C}_{19}\text{H}_{15}\text{F}_3\text{N}_2\text{O}$  ( $\text{M}+\text{H}$ ) $^+$ , 345.1209; found, 345.1182.

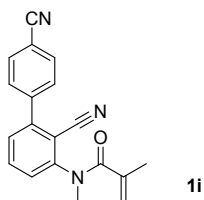

***N*-(2,4'-dicyano-[1,1'-biphenyl]-3-yl)-*N*-methylmethacrylamide.** Purified by column chromatography (petroleum ether : ethyl acetate = 2 : 1). Yellow solid, mp 166–167 °C.  $^1\text{H}$  NMR (500 MHz,  $\text{CDCl}_3$ )  $\delta$  7.72 (d,  $J = 8.3$  Hz, 2H), 7.66 (t,  $J = 7.9$  Hz, 1H), 7.60 (d,  $J = 8.3$  Hz, 2H), 7.39 (d,  $J = 7.7$  Hz, 1H), 7.31 (d,  $J = 7.9$  Hz, 1H), 5.11 (s, 1H), 5.01 (s, 1H), 3.35 (s, 3H), 1.85 (s, 3H).  $^{13}\text{C}$  NMR (126 MHz,  $\text{CDCl}_3$ )  $\delta$  171.4, 148.5, 144.9, 141.6, 139.7, 133.8, 132.3, 129.4, 128.5, 128.1, 119.5, 118.0, 115.2, 112.7, 110.7, 37.7, 19.8. IR (film)  $\nu$  2976, 2225, 1655, 1626, 1586, 1468, 1377, 1362, 1090, 944, 818  $\text{cm}^{-1}$ . HRMS (ESI): calc. for  $\text{C}_{19}\text{H}_{15}\text{N}_3\text{O}$  ( $\text{M}+\text{H}$ ) $^+$ , 302.1288; found, 302.1294.

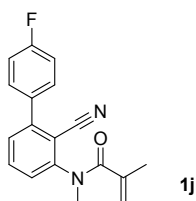

***N*-(2-cyano-4'-fluoro-[1,1'-biphenyl]-3-yl)-*N*-methylmethacrylamide.** Purified by column chromatography (petroleum ether : ethyl acetate = 5 : 1). White solid, mp 130–131 °C.  $^1\text{H}$  NMR (600 MHz,  $\text{CDCl}_3$ )  $\delta$  7.66 (t,  $J = 7.9$  Hz, 1H), 7.57–7.50 (m, 2H), 7.44 (dd,  $J = 7.9, 1.1$  Hz, 1H), 7.33–7.26 (m, 1H), 7.21–7.13 (m, 2H), 5.17 (s, 1H), 5.09 (s, 1H), 3.43 (s, 3H), 1.93 (s, 3H).  $^{13}\text{C}$  NMR (151 MHz,  $\text{CDCl}_3$ )  $\delta$  171.6, 163.0 (d,  $J_{\text{C-F}} = 249.0$  Hz), 148.3, 146.1, 139.8, 133.5, 133.3 (d,  $J_{\text{C-F}} = 2.7$  Hz), 130.5 (d,  $J_{\text{C-F}} = 8.4$  Hz), 128.7, 127.1, 119.7, 115.8 (d,  $J_{\text{C-F}} = 16.9$  Hz), 115.6, 110.8, 37.4, 20.0. IR (film)  $\nu$  2223, 1651, 1624, 1569, 1511, 1467, 1378, 1223, 1091, 922, 849  $\text{cm}^{-1}$ . HRMS (ESI): calc. for  $\text{C}_{18}\text{H}_{15}\text{FN}_2\text{O}$  ( $\text{M}+\text{H}$ ) $^+$ , 295.1241; found, 295.1244.

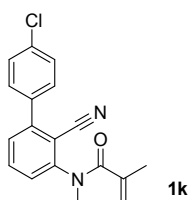

***N*-(4'-chloro-2-cyano-[1,1'-biphenyl]-3-yl)-*N*-methylmethacrylamide.** Purified by column chromatography (petroleum ether : ethyl acetate = 4 : 1). Yellow solid, mp 118–119 °C.  $^1\text{H}$  NMR (600 MHz,  $\text{CDCl}_3$ )  $\delta$  7.68 (t,  $J = 7.9$  Hz, 1H), 7.55–7.39 (m, 5H), 7.31 (d,  $J = 5.8$  Hz, 2H), 5.17 (s, 1H), 5.09 (s, 1H), 3.43 (s, 3H), 1.93 (s, 3H).  $^{13}\text{C}$

NMR (151 MHz, CDCl<sub>3</sub>)  $\delta$  171.4, 148.4, 145.7, 139.7, 135.6, 135.1, 133.5, 129.9, 128.8, 128.5, 127.3, 119.6, 115.5, 110.6, 37.4, 19.9. IR (film)  $\nu$  2976, 2925, 2229, 1653, 1460, 1363, 1084, 1049, 917, 816 cm<sup>-1</sup>. HRMS (ESI): calc. for C<sub>18</sub>H<sub>15</sub>ClN<sub>2</sub>O (M+H)<sup>+</sup>, 311.0946; found, 311.0955.

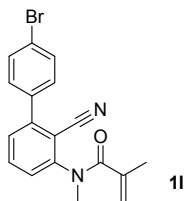

***N*-(4'-bromo-2-cyano-[1,1'-biphenyl]-3-yl)-*N*-methylmethacrylamide.** Purified by column chromatography (petroleum ether : ethyl acetate = 4 : 1). White solid, mp 90–91 °C. <sup>1</sup>H NMR (600 MHz, CDCl<sub>3</sub>)  $\delta$  7.65 (dd, *J* = 14.0, 8.1 Hz, 3H), 7.42 (d, *J* = 8.4 Hz, 3H), 7.31–7.25 (m, 1H), 5.17 (s, 1H), 5.09 (s, 1H), 3.43 (s, 3H), 1.93 (s, 3H). <sup>13</sup>C NMR (151 MHz, CDCl<sub>3</sub>)  $\delta$  171.7, 148.7, 146.1, 139.9, 136.2, 133.6, 132.0, 130.3, 128.6, 127.4, 123.7, 119.7, 115.6, 110.9, 37.7, 20.1. IR (film)  $\nu$  2923, 2228, 1655, 1467, 1361, 1087, 1009, 914, 813 cm<sup>-1</sup>. HRMS (ESI): calc. for C<sub>18</sub>H<sub>15</sub>BrN<sub>2</sub>O (M+H)<sup>+</sup>, 355.0441; found, 355.0438.

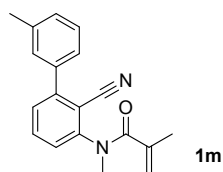

***N*-(2-cyano-3'-methyl-[1,1'-biphenyl]-3-yl)-*N*-methylmethacrylamide.** Purified by column chromatography (petroleum ether : ethyl acetate = 4 : 1). Yellow solid, mp 71–72 °C. <sup>1</sup>H NMR (600 MHz, CDCl<sub>3</sub>)  $\delta$  7.62 (t, *J* = 7.9 Hz, 1H), 7.44 (d, *J* = 7.8 Hz, 1H), 7.41–7.36 (m, 1H), 7.34 (d, *J* = 3.8 Hz, 2H), 7.28 (d, *J* = 7.4 Hz, 1H), 7.24 (d, *J* = 7.2 Hz, 1H), 5.15 (s, 1H), 5.11 (d, *J* = 12.0 Hz, 1H), 3.43 (s, 3H), 2.44 (s, 3H), 1.92 (s, 3H). <sup>13</sup>C NMR (151 MHz, CDCl<sub>3</sub>)  $\delta$  171.7, 148.5, 147.6, 140.0, 138.5, 137.3, 133.3, 129.8, 129.4, 128.8, 128.6, 127.8, 127.0, 125.8, 119.7, 115.8, 110.9, 37.6, 21.4, 20.1. IR (film)  $\nu$  2925, 2223, 1657, 1570, 1456, 1362, 1236, 1099, 922, 791, 704 cm<sup>-1</sup>. HRMS (ESI): calc. for C<sub>19</sub>H<sub>18</sub>N<sub>2</sub>O (M+H)<sup>+</sup>, 291.1492; found, 291.1497.

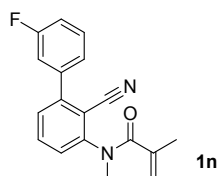

***N*-(2-cyano-3'-fluoro-[1,1'-biphenyl]-3-yl)-*N*-methylmethacrylamide.** Purified by column chromatography (petroleum ether : ethyl acetate = 3 : 1). Yellow solid, mp 74–75 °C. <sup>1</sup>H NMR (600 MHz, CDCl<sub>3</sub>)  $\delta$  7.67 (t, *J* = 7.9 Hz, 1H), 7.50–7.41 (m, 2H), 7.34 (dd, *J* = 7.7, 0.5 Hz, 1H), 7.31 (d, *J* = 7.7 Hz, 1H), 7.27–7.22 (m, 1H), 7.19–7.12 (m, 1H), 5.17 (s, 1H), 5.09 (s, 1H), 3.44 (s, 3H), 1.93 (s, 3H). <sup>13</sup>C NMR (151 MHz, CDCl<sub>3</sub>)  $\delta$  171.6, 162.6 (d, *J*<sub>C-F</sub> = 247.5 Hz), 148.5, 145.8 (d, *J*<sub>C-F</sub> = 1.2 Hz), 139.9, 139.3 (d, *J*<sub>C-F</sub> = 7.8 Hz), 133.6, 130.4 (d, *J*<sub>C-F</sub> = 8.4 Hz), 128.7,



127.6, 124.5 (d,  $J_{C-F} = 2.9$  Hz), 119.8, 116.0 (d,  $J_{C-F} = 21.0$  Hz), 115.8 (d,  $J_{C-F} = 22.7$  Hz), 115.5, 110.9, 37.6, 20.0. IR (film)  $\nu$  2974, 2926, 2225, 1657, 1571, 1466, 1364, 1092, 785, 698  $\text{cm}^{-1}$ . HRMS (ESI): calc. for  $\text{C}_{18}\text{H}_{15}\text{FN}_2\text{O}$  ( $\text{M}+\text{H}$ )<sup>+</sup>, 295.1241; found, 295.1249.

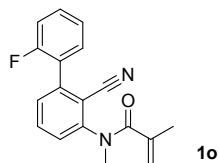

***N*-(2-cyano-2'-fluoro-[1,1'-biphenyl]-3-yl)-*N*-methylmethacrylamide.** Purified by column chromatography (petroleum ether : ethyl acetate = 4 : 1). Yellow solid, mp 81–83 °C. <sup>1</sup>H NMR (600 MHz,  $\text{CDCl}_3$ )  $\delta$  7.67 (t,  $J = 7.9$  Hz, 1H), 7.47–7.40 (m, 3H), 7.33–7.27 (m, 2H), 7.21 (t,  $J = 9.2$  Hz, 1H), 5.16 (s, 1H), 5.07 (s, 1H), 3.43 (s, 3H), 1.92 (s, 3H). <sup>13</sup>C NMR (151 MHz,  $\text{CDCl}_3$ )  $\delta$  171.5, 159.1 (d,  $J_{C-F} = 248.8$  Hz), 147.9, 141.1, 139.7, 133.2, 131.0 (d,  $J_{C-F} = 8.2$  Hz), 130.9 (d,  $J_{C-F} = 2.0$  Hz), 129.6 (d,  $J_{C-F} = 0.7$  Hz), 127.6, 125.0 (d,  $J_{C-F} = 14.7$  Hz), 124.3 (d,  $J_{C-F} = 3.7$  Hz), 119.7, 116.0 (d,  $J = 21.8$  Hz), 115.2, 112.4, 37.4, 19.9. IR (film)  $\nu$  3065, 2229, 1654, 1629, 1569, 1467, 1368, 1219, 1081, 823, 756  $\text{cm}^{-1}$ . HRMS (ESI): calc. for  $\text{C}_{18}\text{H}_{15}\text{FN}_2\text{O}$  ( $\text{M}+\text{Na}$ )<sup>+</sup>, 317.1061; found, 317.1061.

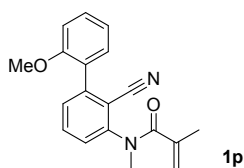

***N*-(2-cyano-2'-methoxy-[1,1'-biphenyl]-3-yl)-*N*-methylmethacrylamide.** Purified by column chromatography (petroleum ether : ethyl acetate = 2 : 1). White solid, mp 119–121 °C. <sup>1</sup>H NMR (600 MHz,  $\text{CDCl}_3$ )  $\delta$  7.61 (t,  $J = 7.9$  Hz, 1H), 7.47–7.40 (m, 1H), 7.38 (dd,  $J = 7.8, 0.8$  Hz, 1H), 7.25 (dd,  $J = 7.5, 1.6$  Hz, 1H), 7.21 (d,  $J = 7.8$  Hz, 1H), 7.10–7.04 (m, 1H), 7.03 (d,  $J = 8.3$  Hz, 1H), 5.12 (d,  $J = 36.5$  Hz, 2H), 3.83 (s, 3H), 3.42 (s, 3H), 1.91 (s, 3H). <sup>13</sup>C NMR (151 MHz,  $\text{CDCl}_3$ )  $\delta$  171.7, 156.2, 147.6, 144.4, 140.0, 133.0, 130.7, 130.6, 129.6, 126.8, 126.5, 120.8, 119.8, 115.8, 113.2, 111.3, 55.4, 37.4, 20.1. IR (film)  $\nu$  3432, 3060, 2923, 2228, 1657, 1627, 1499, 1367, 1244, 827, 755  $\text{cm}^{-1}$ . HRMS (ESI): calc. for  $\text{C}_{19}\text{H}_{18}\text{N}_2\text{O}_2$  ( $\text{M}+\text{H}$ )<sup>+</sup>, 307.1441; found, 307.1443.

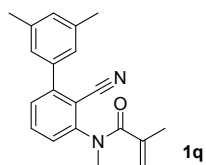

***N*-(2-cyano-3',5'-dimethyl-[1,1'-biphenyl]-3-yl)-*N*-methylmethacrylamide.** Purified by column chromatography (petroleum ether : ethyl acetate = 4 : 1). Yellow solid, mp 132–133 °C. <sup>1</sup>H NMR (600 MHz,  $\text{CDCl}_3$ )  $\delta$  7.61 (t,  $J = 7.9$  Hz, 1H), 7.43 (dd,  $J = 7.8, 1.0$  Hz, 1H), 7.22 (d,  $J = 7.2$  Hz, 1H), 7.14 (s, 2H), 7.10 (s, 1H), 5.14 (s, 1H), 5.10 (s, 1H), 3.43 (s, 3H), 2.39 (s, 6H), 1.92 (s, 3H). <sup>13</sup>C NMR (151 MHz,  $\text{CDCl}_3$ )  $\delta$  171.7, 148.4, 147.7, 140.0, 138.3, 137.3, 133.2, 130.6, 128.8, 126.8, 126.4, 119.7, 115.8, 110.8, 37.4, 21.2, 20.1. IR (film)  $\nu$  2925, 2225, 1649, 1622,

1569, 1460, 1370, 1105, 854, 820, 701  $\text{cm}^{-1}$ . HRMS (ESI): calc. for  $\text{C}_{20}\text{H}_{20}\text{N}_2\text{O}$  ( $\text{M}+\text{H}$ )<sup>+</sup>, 305.1648; found, 305.1651.

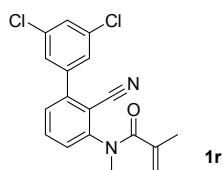

***N*-(3',5'-dichloro-2-cyano-[1,1'-biphenyl]-3-yl)-*N*-methylmethacrylamide.** Purified by column chromatography (petroleum ether : ethyl acetate = 3 : 1). White solid, mp 110–111 °C. <sup>1</sup>H NMR (600 MHz,  $\text{CDCl}_3$ )  $\delta$  7.70 (t,  $J$  = 7.9 Hz, 1H), 7.45 (t,  $J$  = 1.8 Hz, 1H), 7.44–7.40 (m, 3H), 7.35 (d,  $J$  = 7.9 Hz, 1H), 5.19 (s, 1H), 5.09 (s, 1H), 3.44 (s, 3H), 1.94 (s, 3H). <sup>13</sup>C NMR (151 MHz,  $\text{CDCl}_3$ )  $\delta$  171.5, 148.5, 144.1, 140.0, 139.7, 135.2, 133.7, 128.9, 128.5, 128.1, 127.1, 119.7, 115.0, 110.8, 37.7, 19.9. IR (film)  $\nu$  3059, 2972, 2225, 1662, 1560, 1415, 1353, 1098, 875, 796, 749  $\text{cm}^{-1}$ . HRMS (ESI): calc. for  $\text{C}_{18}\text{H}_{14}\text{Cl}_2\text{N}_2\text{O}$  ( $\text{M}+\text{H}$ )<sup>+</sup>, 345.0556; found, 345.0539.

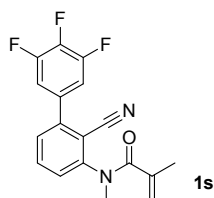

***N*-(2-cyano-3',4',5'-trifluoro-[1,1'-biphenyl]-3-yl)-*N*-methylmethacrylamide.** Purified by column chromatography (petroleum ether : ethyl acetate = 3 : 1). Yellow solid, mp 96–98 °C. <sup>1</sup>H NMR (600 MHz,  $\text{CDCl}_3$ )  $\delta$  7.69 (t,  $J$  = 7.9 Hz, 1H), 7.40 (d,  $J$  = 7.4 Hz, 1H), 7.34 (d,  $J$  = 7.9 Hz, 1H), 7.24–7.13 (m, 2H), 5.20 (s, 1H), 5.09 (s, 1H), 3.43 (s, 3H), 1.94 (s, 3H). <sup>13</sup>C NMR (151 MHz,  $\text{CDCl}_3$ )  $\delta$  171.7, 151.2 (ddd,  $J$  = 252.1, 10.1, 4.1 Hz), 148.8, 144.0, 140.4 (dt,  $J$  = 255.4, 15.1 Hz), 139.9, 133.8, 133.2 (dd,  $J$  = 12.9, 8.2 Hz), 128.6, 128.2, 119.8, 115.1, 113.4 (dd,  $J$  = 17.3, 5.0 Hz), 111.0, 37.9, 20.1. IR (film)  $\nu$  3076, 2226, 1650, 1573, 1473, 1416, 1362, 1089, 1044, 867, 822  $\text{cm}^{-1}$ . HRMS (ESI): calc. for  $\text{C}_{18}\text{H}_{13}\text{F}_3\text{N}_2\text{O}$  ( $\text{M}+\text{H}$ )<sup>+</sup>, 331.1053; found, 331.1058.

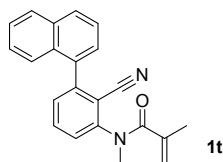

***N*-(2-cyano-3-(naphthalen-1-yl)phenyl)-*N*-methylmethacrylamide.** Purified by column chromatography (petroleum ether : ethyl acetate = 3 : 1). Yellow solid, mp 96–97 °C. <sup>1</sup>H NMR (600 MHz,  $\text{CDCl}_3$ )  $\delta$  7.94 (dd,  $J$  = 13.3, 8.3 Hz, 2H), 7.68 (t,  $J$  = 7.9 Hz, 1H), 7.60–7.40 (m, 6H), 7.35 (d,  $J$  = 7.7 Hz, 1H), 5.23 (s, 1H), 5.11 (s, 1H), 3.46 (s, 3H), 1.96 (s, 3H). <sup>13</sup>C NMR (151 MHz,  $\text{CDCl}_3$ )  $\delta$  171.6, 148.0, 146.2, 140.2, 135.0, 133.6, 133.0, 131.1, 130.2, 129.5, 128.6, 127.3, 126.7, 126.2, 125.1, 124.7, 119.7, 115.2, 113.3, 37.6, 20.1. IR (film)  $\nu$  2911, 2852, 2225, 2075, 1635, 1510, 1453, 1393, 1120, 732, 776  $\text{cm}^{-1}$ . HRMS (ESI): calc. for  $\text{C}_{22}\text{H}_{18}\text{N}_2\text{O}$  ( $\text{M}+\text{H}$ )<sup>+</sup>, 327.1492; found,

327.1495.

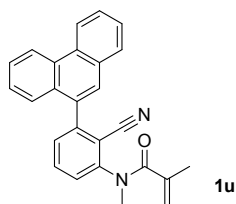

***N*-(2-cyano-3-(phenanthren-9-yl)phenyl)-*N*-methylmethacrylamide.** Purified by column chromatography (petroleum ether : ethyl acetate = 3 : 1). Yellow solid, mp 88–90 °C. <sup>1</sup>H NMR (600 MHz, CDCl<sub>3</sub>) δ 8.74 (d, *J* = 8.5 Hz, 1H), 8.68 (d, *J* = 8.3 Hz, 1H), 7.89 (d, *J* = 7.7 Hz, 1H), 7.71 (s, 1H), 7.69–7.57 (m, 4H), 7.56–7.37 (m, 3H), 7.33 (d, *J* = 7.8 Hz, 1H), 5.24 (s, 1H), 5.12 (s, 1H), 3.45 (s, 3H), 1.96 (s, 3H). <sup>13</sup>C NMR (151 MHz, CDCl<sub>3</sub>) δ 171.6, 147.9, 146.1, 140.1, 133.7, 133.2, 130.7, 130.5, 130.4, 130.11, 130.05, 128.9, 128.4, 127.4, 127.3, 127.0, 126.9, 126.8, 125.6, 123.1, 122.5, 119.5, 115.1, 113.3, 37.5, 20.1. IR (film) ν 3061, 2924, 2226, 1655, 1624, 1569, 1451, 1364, 743, 721 cm<sup>-1</sup>. HRMS (ESI): calc. for C<sub>26</sub>H<sub>20</sub>N<sub>2</sub>O (M+H)<sup>+</sup>, 377.1648; found, 377.1656.

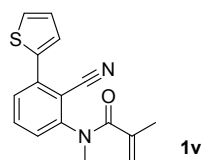

***N*-(2-cyano-3-(thiophen-2-yl)phenyl)-*N*-methylmethacrylamide.** Purified by column chromatography (petroleum ether : ethyl acetate = 3 : 1). Yellow solid, mp 63–64 °C. <sup>1</sup>H NMR (600 MHz, CDCl<sub>3</sub>) δ 7.67 (dd, *J* = 3.6, 0.8 Hz, 1H), 7.62–7.53 (m, 2H), 7.47 (dd, *J* = 5.1, 0.7 Hz, 1H), 7.24–7.13 (m, 2H), 5.15 (s, 1H), 5.10 (s, 2H), 3.42 (s, 3H), 1.92 (s, 3H). <sup>13</sup>C NMR (151 MHz, CDCl<sub>3</sub>) δ 171.7, 149.1, 139.9, 139.4, 138.5, 133.5, 128.5, 128.3, 128.2, 127.9, 127.1, 119.9, 116.0, 109.6, 37.5, 20.1. IR (film) ν 3076, 2923, 2225, 1659, 1629, 1569, 1466, 1364, 1093, 807, 707 cm<sup>-1</sup>. HRMS (ESI): calc. for C<sub>16</sub>H<sub>14</sub>N<sub>2</sub>OS (M+H)<sup>+</sup>, 283.0900; found, 283.0904.

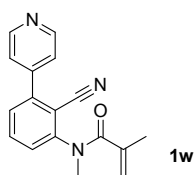

***N*-(2-cyano-3-(pyridin-4-yl)phenyl)-*N*-methylmethacrylamide.** Purified by column chromatography (petroleum ether : ethyl acetate = 1 : 1). White solid, mp 103–105 °C. <sup>1</sup>H NMR (600 MHz, CDCl<sub>3</sub>) δ 8.77 (d, *J* = 5.2 Hz, 2H), 7.73 (t, *J* = 7.9 Hz, 1H), 7.48 (t, *J* = 7.0 Hz, 3H), 7.38 (d, *J* = 7.8 Hz, 1H), 5.20 (s, 1H), 5.10 (s, 1H), 3.45 (s, 3H), 1.95 (s, 3H). <sup>13</sup>C NMR (151 MHz, CDCl<sub>3</sub>) δ 171.6, 150.3, 148.9, 144.8, 144.2, 139.8, 133.9, 128.5, 128.4, 123.2, 119.9, 115.1, 110.8, 37.8, 20.0. IR (film) ν 3093, 2224, 1650, 1623, 1470, 1416, 1365, 1234, 1096, 931, 815 cm<sup>-1</sup>. HRMS (ESI): calc. for C<sub>18</sub>H<sub>13</sub>F<sub>3</sub>N<sub>2</sub>O (M+H)<sup>+</sup>, 278.1288; found, 278.1291.

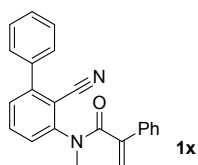

***N*-(2-cyano-[1,1'-biphenyl]-3-yl)-*N*-methyl-2-phenylacrylamide.** Purified by column chromatography (petroleum ether : ethyl acetate = 3 : 1). Yellow solid, mp 78–79 °C. <sup>1</sup>H NMR (600 MHz, CDCl<sub>3</sub>) δ 7.42 (t, *J* = 7.4 Hz, 3H), 7.36 (t, *J* = 7.9 Hz, 1H), 7.30 (d, *J* = 6.6 Hz, 2H), 7.23 (d, *J* = 7.8 Hz, 1H), 7.18 (d, *J* = 3.5 Hz, 3H), 7.07 (d, *J* = 3.6 Hz, 2H), 6.98 (d, *J* = 7.9 Hz, 1H), 5.77 (s, 1H), 5.49 (s, 1H), 3.45 (s, 3H). <sup>13</sup>C NMR (151 MHz, CDCl<sub>3</sub>) δ 170.1, 146.81, 146.79, 146.0, 137.1, 136.3, 132.6, 128.7, 128.6, 128.45, 128.41, 128.3, 128.1, 127.9, 126.1, 119.9, 115.6, 111.0, 36.7. IR (film) ν 3048, 2223, 1654, 1465, 1364, 1256, 1181, 1081, 927, 762, 701 cm<sup>-1</sup>. HRMS (ESI): calc. for C<sub>23</sub>H<sub>18</sub>N<sub>2</sub>O (M+H)<sup>+</sup>, 339.1492; found, 339.1500.

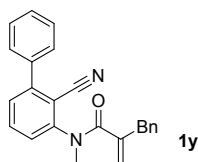

**2-benzyl-*N*-(2-cyano-[1,1'-biphenyl]-3-yl)-*N*-methylacrylamide.** Purified by column chromatography (petroleum ether : ethyl acetate = 4 : 1). White solid, mp 86–88 °C. <sup>1</sup>H NMR (600 MHz, CDCl<sub>3</sub>) δ 7.54–7.44 (m, 5H), 7.38 (d, *J* = 6.3 Hz, 2H), 7.31 (t, *J* = 7.4 Hz, 2H), 7.25 (m, 1H), 7.15 (s, 2H), 6.39 (s, 1H), 5.09 (s, 1H), 5.03 (s, 1H), 3.76 (s, 1H), 3.49 (s, 1H), 3.35 (s, 3H). <sup>13</sup>C NMR (151 MHz, CDCl<sub>3</sub>) δ 170.99, 148.32, 147.24, 143.69, 137.55, 137.31, 133.29, 129.46, 129.00, 128.71, 128.66, 128.48, 127.28, 126.60, 119.55, 115.90, 110.76, 40.08, 37.43. IR (film) ν 3028, 2219, 1655, 1564, 1430, 1358, 1185, 1080, 920, 758, 700 cm<sup>-1</sup>. HRMS (ESI): calc. for C<sub>24</sub>H<sub>20</sub>N<sub>2</sub>O (M+H)<sup>+</sup>, 353.1648; found, 353.1653.

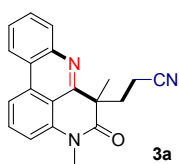

**3-(4,6-dimethyl-5-oxo-5,6-dihydro-4*H*-pyrido[4,3,2-*gh*]phenanthridin-6-yl)propanenitrile.** Purified by column chromatography (petroleum ether : ethyl acetate = 4 : 1). Yellow solid, mp 130–131 °C. <sup>1</sup>H NMR (500 MHz, CDCl<sub>3</sub>) δ 8.54 (d, *J* = 8.2 Hz, 1H), 8.30 (d, *J* = 8.3 Hz, 1H), 8.15 (d, *J* = 8.2 Hz, 1H), 7.85 (t, *J* = 8.1 Hz, 1H), 7.78 (t, *J* = 7.6 Hz, 1H), 7.68 (t, *J* = 7.6 Hz, 1H), 7.24 (d, *J* = 8.0 Hz, 1H), 3.60 (s, 3H), 3.00–2.94 (m, 1H), 2.80–2.74 (m, 1H), 2.30 – 2.22 (m, 2H), 1.69 (s, 3H). <sup>13</sup>C NMR (126 MHz, CDCl<sub>3</sub>) δ 172.5, 157.3, 144.7, 138.3, 133.4, 132.1, 129.8, 129.3, 127.0, 122.7, 122.6, 119.3, 116.5, 112.0, 111.0, 50.7, 34.1, 30.4, 29.9, 13.6. IR (film) ν 2981, 2244, 1671, 1609, 1591, 1466, 1342, 1074, 761, 646, 496 cm<sup>-1</sup>. HRMS (ESI): calc. for C<sub>20</sub>H<sub>17</sub>N<sub>3</sub>O (M+H)<sup>+</sup>, 316.1444; found, 316.1445.

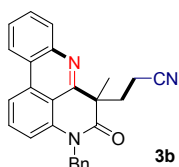

**3-(4-benzyl-6-methyl-5-oxo-5,6-dihydro-4H-pyrido[4,3,2-*gh*]phenanthridin-6-yl)propanenitrile.** Purified by column chromatography (petroleum ether : ethyl acetate = 5 : 1). Yellow solid, mp 135–137 °C. <sup>1</sup>H NMR (600 MHz, CDCl<sub>3</sub>) δ 8.55–8.45 (m, 1H), 8.26 (d, *J* = 8.2 Hz, 1H), 8.17 (dd, *J* = 8.2, 0.8 Hz, 1H), 7.82–7.74 (m, 1H), 7.73–7.60 (m, 2H), 7.37–7.31 (m, 2H), 7.28 (dd, *J* = 13.5, 7.2 Hz, 3H), 7.15 (d, *J* = 7.9 Hz, 1H), 5.66 (d, *J* = 15.6 Hz, 1H), 5.20 (d, *J* = 15.5 Hz, 1H), 3.13–3.02 (m, 1H), 2.89–2.78 (m, 1H), 2.42–2.29 (m, 2H), 1.76 (s, 3H). <sup>13</sup>C NMR (151 MHz, CDCl<sub>3</sub>) δ 172.9, 157.2, 144.8, 137.5, 136.1, 133.7, 132.0, 129.9, 129.4, 129.0, 127.5, 127.1, 126.3, 122.9, 122.6, 119.4, 116.6, 112.21, 112.15, 51.0, 46.4, 33.7, 30.7, 13.7. IR (film) ν 2956, 2919, 2850, 2050, 1667, 1638, 1618, 1455, 1187, 762, 643 cm<sup>-1</sup>. HRMS (ESI): calc. for C<sub>26</sub>H<sub>21</sub>N<sub>3</sub>O (M+H)<sup>+</sup>, 392.1757; found, 392.1765.

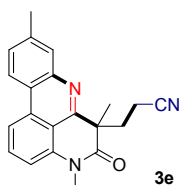

**3-(4,6,9-trimethyl-5-oxo-5,6-dihydro-4H-pyrido[4,3,2-*gh*]phenanthridin-6-yl)propanenitrile.** Purified by column chromatography (petroleum ether : ethyl acetate = 4 : 1). Yellow solid, mp 126–127 °C. <sup>1</sup>H NMR (500 MHz, CDCl<sub>3</sub>) δ 8.41 (dd, *J* = 8.4, 2.2 Hz, 1H), 8.25 (dd, *J* = 8.3, 2.0 Hz, 1H), 7.95 (s, 1H), 7.85–7.77 (m, 1H), 7.50 (d, *J* = 8.3 Hz, 1H), 7.20 (d, *J* = 7.9 Hz, 1H), 3.59 (d, *J* = 1.7 Hz, 3H), 3.01–2.89 (m, 1H), 2.81–2.70 (m, 1H), 2.61 (s, 3H), 2.32–2.18 (m, 2H), 1.68 (s, 3H). <sup>13</sup>C NMR (126 MHz, CDCl<sub>3</sub>) δ 172.6, 157.3, 144.9, 139.7, 138.3, 133.5, 131.9, 129.3, 128.8, 122.3, 120.4, 119.3, 116.3, 111.7, 110.5, 50.7, 34.3, 30.2, 29.9, 21.5, 13.6. IR (film) ν 2926, 2245, 1670, 1588, 1569, 1469, 1406, 1341, 1075, 802, 768 cm<sup>-1</sup>. HRMS (ESI): calc. for C<sub>21</sub>H<sub>19</sub>N<sub>3</sub>O (M+H)<sup>+</sup>, 330.1601; found, 330.1607.

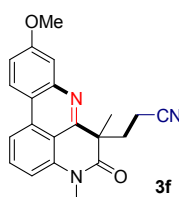

**3-(9-methoxy-4,6-dimethyl-5-oxo-5,6-dihydro-4H-pyrido[4,3,2-*gh*]phenanthridin-6-yl)propanenitrile.** Purified by column chromatography (petroleum ether : ethyl acetate = 5 : 1). Yellow solid, mp 128–129 °C. <sup>1</sup>H NMR (600 MHz, CDCl<sub>3</sub>) δ 8.41 (d, *J* = 9.0 Hz, 1H), 8.18 (d, *J* = 8.4 Hz, 1H), 7.80 (t, *J* = 8.1 Hz, 1H), 7.53 (d, *J* = 2.5 Hz, 1H), 7.31 (dd, *J* = 9.0, 2.6 Hz, 1H), 7.15 (d, *J* = 7.8 Hz, 1H), 4.02 (s, 3H), 3.59 (s, 3H), 3.01–2.91 (m, 1H), 2.81–2.72 (m, 1H), 2.32–2.19 (m, 2H), 1.69 (s, 3H). <sup>13</sup>C NMR (126 MHz, CDCl<sub>3</sub>) δ 172.5, 160.6, 157.8, 146.5, 138.3, 133.6, 132.0, 123.7, 119.3, 118.4, 116.8, 116.0, 111.1, 109.8, 109.2, 55.6, 50.7, 34.3, 30.3, 29.8, 13.6. IR

(film)  $\nu$  2929, 2245, 1669, 1614, 1588, 1472, 1340, 1233, 1197, 802, 767  $\text{cm}^{-1}$ . HRMS (ESI): calc. for  $\text{C}_{21}\text{H}_{19}\text{N}_3\text{O}_2$  ( $\text{M}+\text{H}$ )<sup>+</sup>, 346.1550; found, 346.1558.

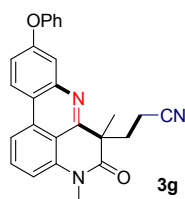

**3-(4,6-dimethyl-5-oxo-9-phenoxy-5,6-dihydro-4H-pyrido[4,3,2-gh]phenanthridin-6-yl)propanenitrile.**

Purified by column chromatography (petroleum ether : ethyl acetate = 5 : 1). Yellow solid, mp 69–71 °C. <sup>1</sup>H NMR (600 MHz,  $\text{CDCl}_3$ )  $\delta$  8.50 (d,  $J$  = 9.0 Hz, 1H), 8.22 (d,  $J$  = 8.3 Hz, 1H), 7.83 (t,  $J$  = 8.1 Hz, 1H), 7.56 (d,  $J$  = 2.5 Hz, 1H), 7.50–7.40 (m, 3H), 7.24 (t,  $J$  = 7.5 Hz, 1H), 7.19 (t,  $J$  = 7.3 Hz, 3H), 3.59 (s, 3H), 2.93–2.85 (m, 1H), 2.78–2.69 (m, 1H), 2.28–2.16 (m, 2H), 1.66 (s, 3H). <sup>13</sup>C NMR (151 MHz,  $\text{CDCl}_3$ )  $\delta$  172.6, 158.9, 158.3, 156.1, 146.3, 138.5, 133.5, 132.3, 130.1, 124.4, 124.2, 120.1, 119.5, 119.2, 118.4, 116.2, 115.7, 111.5, 110.4, 50.7, 34.3, 30.3, 29.9, 13.7. IR (film)  $\nu$  2959, 2920, 2085, 1639, 1530, 1487, 1408, 1255, 873, 747, 692  $\text{cm}^{-1}$ . HRMS (ESI): calc. for  $\text{C}_{26}\text{H}_{21}\text{N}_3\text{O}_2$  ( $\text{M}+\text{H}$ )<sup>+</sup>, 408.1707; found, 408.1712.

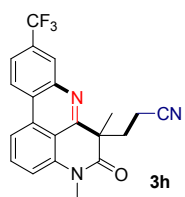

**3-(4,6-dimethyl-5-oxo-9-(trifluoromethyl)-5,6-dihydro-4H-pyrido[4,3,2-gh]phenanthridin-6-yl)propanenitrile.**

Purified by column chromatography (petroleum ether : ethyl acetate = 4 : 1). White solid, mp 177–178 °C. <sup>1</sup>H NMR (600 MHz,  $\text{CDCl}_3$ )  $\delta$  8.66 (d,  $J$  = 8.6 Hz, 1H), 8.46 (s, 1H), 8.33 (d,  $J$  = 8.2 Hz, 1H), 7.93 (t,  $J$  = 8.1 Hz, 1H), 7.87 (dd,  $J$  = 8.6, 1.7 Hz, 1H), 7.34 (d,  $J$  = 7.9 Hz, 1H), 3.62 (s, 3H), 3.02–2.91 (m, 1H), 2.83–2.74 (m, 1H), 2.34–2.22 (m, 2H), 1.71 (s, 3H). <sup>13</sup>C NMR (151 MHz,  $\text{CDCl}_3$ )  $\delta$  172.3, 159.4, 144.1, 138.7, 132.8, 132.8, 131.2 (q,  $J_{\text{C-F}}$  = 32.9 Hz), 127.4 (q,  $J_{\text{C-F}}$  = 4.1 Hz), 125.1, 124.0 (q,  $J_{\text{C-F}}$  = 272.4 Hz), 123.8, 122.8 (d,  $J_{\text{C-F}}$  = 3.1 Hz), 119.0, 116.7, 112.6, 112.2, 50.9, 34.2, 30.4, 30.0, 13.7. IR (film)  $\nu$  3090, 2247, 1659, 1591, 1359, 1333, 1314, 1185, 1118, 814, 772  $\text{cm}^{-1}$ . HRMS (ESI): calc. for  $\text{C}_{20}\text{H}_{16}\text{BrN}_3\text{O}$  ( $\text{M}+\text{H}$ )<sup>+</sup>, 384.1318; found, 384.1323.

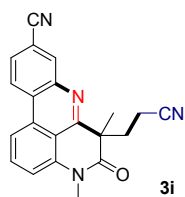

**6-(2-cyanoethyl)-4,6-dimethyl-5-oxo-5,6-dihydro-4H-pyrido[4,3,2-gh]phenanthridine-9-carbonitrile.** Purified by column chromatography (petroleum ether : ethyl acetate = 3 : 1). Yellow solid, mp 295–296 °C. <sup>1</sup>H NMR (600

MHz, CDCl<sub>3</sub>) δ 8.62 (d, *J* = 8.5 Hz, 1H), 8.50 (d, *J* = 1.6 Hz, 1H), 8.31 (d, *J* = 8.2 Hz, 1H), 7.96 (t, *J* = 8.1 Hz, 1H), 7.85 (dd, *J* = 8.5, 1.7 Hz, 1H), 7.37 (d, *J* = 7.9 Hz, 1H), 3.62 (s, 3H), 2.98–2.91 (m, 1H), 2.81–2.74 (m, 1H), 2.35–2.22 (m, 2H), 1.71 (s, 3H). <sup>13</sup>C NMR (151 MHz, CDCl<sub>3</sub>) δ 172.2, 160.1, 144.0, 138.8, 134.9, 133.1, 132.5, 128.4, 126.0, 124.1, 118.8, 118.3, 116.8, 112.8, 112.7, 50.9, 34.2, 30.4, 30.1, 13.7. IR (film) ν 2927, 2227, 1667, 1589, 1467, 1340, 1161, 1092, 804, 774, 630 cm<sup>-1</sup>. HRMS (ESI): calc. for C<sub>21</sub>H<sub>16</sub>N<sub>4</sub>O (M+Na)<sup>+</sup>, 363.1216; found, 363.1218.

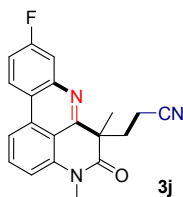

**3-(9-fluoro-4,6-dimethyl-5-oxo-5,6-dihydro-4H-pyrido[4,3,2-*gh*]phenanthridin-6-yl)propanenitrile.** Purified by column chromatography (petroleum ether : ethyl acetate = 4 : 1). Yellow solid, mp 146–147 °C. <sup>1</sup>H NMR (600 MHz, CDCl<sub>3</sub>) δ 8.52 (dd, *J* = 9.1, 5.8 Hz, 1H), 8.23 (d, *J* = 8.3 Hz, 1H), 7.86 (t, *J* = 8.1 Hz, 1H), 7.79 (dd, *J* = 9.7, 2.7 Hz, 1H), 7.46–7.41 (m, 1H), 7.24 (d, *J* = 7.9 Hz, 1H), 3.60 (s, 3H), 2.97–2.90 (m, 1H), 2.80–2.73 (m, 1H), 2.32–2.20 (m, 2H), 1.69 (s, 3H). <sup>13</sup>C NMR (151 MHz, CDCl<sub>3</sub>) δ 172.4, 163.1 (d, *J*<sub>C-F</sub> = 249.5 Hz), 159.0, 146.1 (d, *J*<sub>C-F</sub> = 12.2 Hz), 138.6, 133.3, 132.5, 124.6 (d, *J*<sub>C-F</sub> = 9.7 Hz), 119.6, 119.1, 116.4, 116.2 (d, *J*<sub>C-F</sub> = 2.8 Hz), 114.3 (d, *J*<sub>C-F</sub> = 20.5 Hz), 111.7, 110.8, 50.8, 34.3, 30.3, 30.0, 13.7. IR (film) ν 2931, 2246, 1670, 1612, 1590, 1579, 1470, 1339, 1169, 794, 771 cm<sup>-1</sup>. HRMS (ESI): calc. for C<sub>20</sub>H<sub>16</sub>FN<sub>3</sub>O (M+H)<sup>+</sup>, 334.1350; found, 334.1355.

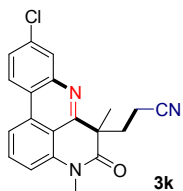

**3-(9-chloro-4,6-dimethyl-5-oxo-5,6-dihydro-4H-pyrido[4,3,2-*gh*]phenanthridin-6-yl)propanenitrile.** Purified by column chromatography (petroleum ether : ethyl acetate = 4 : 1). White solid, mp 175–176 °C. <sup>1</sup>H NMR (600 MHz, CDCl<sub>3</sub>) δ 8.45 (d, *J* = 8.8 Hz, 1H), 8.24 (d, *J* = 8.2 Hz, 1H), 8.15 (d, *J* = 2.2 Hz, 1H), 7.87 (t, *J* = 8.1 Hz, 1H), 7.62 (dd, *J* = 8.8, 2.2 Hz, 1H), 7.26 (d, *J* = 7.9 Hz, 1H), 3.60 (s, 3H), 2.98–2.88 (m, 1H), 2.81–2.70 (m, 1H), 2.34–2.19 (m, 2H), 1.68 (s, 3H). <sup>13</sup>C NMR (151 MHz, CDCl<sub>3</sub>) δ 172.4, 159.0, 145.4, 138.6, 135.2, 133.1, 132.6, 129.0, 127.7, 124.0, 121.3, 119.1, 116.3, 112.0, 111.3, 50.8, 34.2, 30.3, 30.0, 13.7. IR (film) ν 2975, 2925, 2078, 1638, 1453, 1403, 1384, 1336, 1152, 1049, 879 cm<sup>-1</sup>. HRMS (ESI): calc. for C<sub>20</sub>H<sub>16</sub>ClN<sub>3</sub>O (M+H)<sup>+</sup>, 350.1055; found, 350.1064.

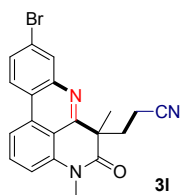

**3-(9-bromo-4,6-dimethyl-5-oxo-5,6-dihydro-4H-pyrido[4,3,2-gh]phenanthridin-6-yl)propanenitrile (3l).** Purified by column chromatography (petroleum ether : ethyl acetate = 4 : 1). Yellow solid, mp 189–190 °C. <sup>1</sup>H NMR (600 MHz, CDCl<sub>3</sub>) δ 8.38 (d, *J* = 8.7 Hz, 1H), 8.33 (d, *J* = 1.9 Hz, 1H), 8.24 (d, *J* = 8.3 Hz, 1H), 7.87 (t, *J* = 8.1 Hz, 1H), 7.75 (dd, *J* = 8.7, 1.9 Hz, 1H), 7.27 (d, *J* = 8.0 Hz, 1H), 3.60 (s, 3H), 2.98–2.86 (m, 1H), 2.80–2.70 (m, 1H), 2.33–2.19 (m, 2H), 1.68 (s, 3H). <sup>13</sup>C NMR (151 MHz, CDCl<sub>3</sub>) δ 172.4, 159.0, 145.6, 138.6, 133.2, 132.6, 132.2, 130.3, 124.1, 123.3, 121.7, 119.0, 116.3, 112.0, 111.4, 50.8, 34.3, 30.3, 30.0, 13.6. IR (film) ν 2952, 2851, 2026, 1664, 1638, 1589, 1466, 1340, 1080, 800, 746 cm<sup>-1</sup>. HRMS (ESI): calc. for C<sub>20</sub>H<sub>16</sub>BrN<sub>3</sub>O (M+H)<sup>+</sup>, 394.0550; found, 394.0548.

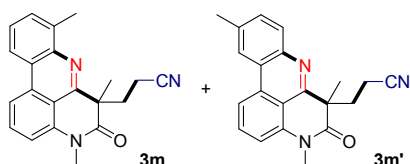

**3-(4,6,8-trimethyl-5-oxo-5,6-dihydro-4H-pyrido[4,3,2-gh]phenanthridin-6-yl)propanenitrile (3m); 3-(4,6,10-trimethyl-5-oxo-5,6-dihydro-4H-pyrido[4,3,2-gh]phenanthridin-6-yl)propanenitrile (3m').** Purified by column chromatography (petroleum ether : ethyl acetate = 6 : 1), products **3m** and **3m'** can not be separated column chromatography on silica gel. Yellow solid, mp 132–133 °C. <sup>1</sup>H NMR (600 MHz, CDCl<sub>3</sub>) δ 8.40 (d, *J* = 8.1 Hz, 1H), 8.34–8.24 (m, 1.80H), 8.03 (d, *J* = 8.3 Hz, 0.36H), 7.86–7.78 (m, 1.36H), 7.64 (d, *J* = 7.0 Hz, 1H), 7.60 (dd, *J* = 8.3, 1.5 Hz, 0.4H), 7.59–7.55 (m, 1.1H), 7.24–7.19 (m, 1.35H), 3.60 (s, 3H), 3.59 (s, 1.10H), 3.02–2.92 (m, 1.52H), 2.86 (s, 3H), 2.82–2.72 (m, 1.43H), 2.63 (s, 1.14H), 2.34–2.20 (m, 2.89H), 1.69 (s, 3H), 1.68 (s, 1.17H). <sup>13</sup>C NMR (151 MHz, CDCl<sub>3</sub>) δ 172.72, 172.68, 156.2, 155.7, 143.4, 143.1, 138.32, 138.28, 137.7, 137.0, 133.8, 133.6, 133.2, 131.83, 131.76, 131.1, 130.1, 130.0, 129.5, 128.4, 126.7, 122.5, 122.1, 120.4, 119.3, 116.8, 116.5, 111.8, 110.9, 110.8, 50.9, 50.6, 34.4, 34.3, 30.61, 30.59, 30.2, 29.94, 29.92, 21.9, 18.2, 13.65, 13.60. IR (film) ν 2951, 2922, 2245, 2050, 1668, 1612, 1589, 1464, 1339, 777, 751 cm<sup>-1</sup>. HRMS (ESI): calc. for C<sub>21</sub>H<sub>19</sub>N<sub>3</sub>O (M+H)<sup>+</sup>, 330.1601; found, 330.1608.

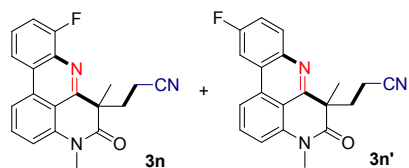

**3-(8-fluoro-4,6-dimethyl-5-oxo-5,6-dihydro-4H-pyrido[4,3,2-gh]phenanthridin-6-yl)propanenitrile (3n); 3-(10-fluoro-4,6-dimethyl-5-oxo-5,6-dihydro-4H-pyrido[4,3,2-gh]phenanthridin-6-yl)propanenitrile (3n').** Purified by column chromatography (petroleum ether : ethyl acetate = 5 : 1), products **3n** and **3n'** can not be separated



column chromatography on silica gel. Yellow solid, mp 136–137 °C. <sup>1</sup>H NMR (600 MHz, CDCl<sub>3</sub>) δ 8.32 (d, *J* = 8.3 Hz, 1H), 8.28 (d, *J* = 8.3 Hz, 1H), 8.17 (d, *J* = 8.3 Hz, 0.84H), 8.15–8.09 (m, 1.64H), 7.90–7.86 (m, 1H), 7.63–7.60 (m, 1H), 7.54–7.46 (m, 2H), 7.31–7.27 (m, 1.81H), 3.62 (s, 3H), 3.61 (s, 2.66H), 3.05–2.90 (m, 1.89H), 2.82–2.70 (m, 1.85H), 2.35–2.19 (m, 3.76H), 1.72 (s, 3H), 1.68 (s, 2.59H). <sup>13</sup>C NMR (126 MHz, CDCl<sub>3</sub>) δ 172.5, 172.5, 161.3 (d, *J*<sub>C-F</sub> = 248.0 Hz), 158.4 (d, *J*<sub>C-F</sub> = 256.4 Hz), 158.0, 156.7, 156.7, 141.6, 138.6 (d, *J*<sub>C-F</sub> = 21.4 Hz), 134.6 (d, *J*<sub>C-F</sub> = 10.9 Hz), 132.95, 132.91, 132.6, 132.14 (s), 132.1, 130.1, 128.4, 126.9 (d, *J*<sub>C-F</sub> = 8.4 Hz), 124.8 (d, *J*<sub>C-F</sub> = 1.2 Hz), 124.1 (d, *J*<sub>C-F</sub> = 9.4 Hz), 119.1 (d, *J*<sub>C-F</sub> = 13.2 Hz), 118.4 (d, *J*<sub>C-F</sub> = 24.3 Hz), 118.1 (d, *J*<sub>C-F</sub> = 4.5 Hz), 116.7, 116.6, 114.3 (d, *J*<sub>C-F</sub> = 19.2 Hz), 112.2, 112.0, 111.6 (d, *J*<sub>C-F</sub> = 2.7 Hz), 107.4 (d, *J*<sub>C-F</sub> = 23.4 Hz), 50.9, 50.7, 34.4, 34.3, 30.2, 30.2, 30.0, 13.6, 13.6. IR (film) ν 2971, 2901, 2025, 1637, 1619, 1453, 1394, 1252, 1051, 880, 785 cm<sup>-1</sup>. HRMS (ESI): calc. for C<sub>20</sub>H<sub>16</sub>FN<sub>3</sub>O (M+H)<sup>+</sup>, 334.1350; found, 334.1356.

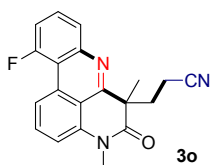

**3-(11-fluoro-4,6-dimethyl-5-oxo-5,6-dihydro-4H-pyrido[4,3,2-*gh*]phenanthridin-6-yl)propanenitrile.** Purified by column chromatography (petroleum ether : ethyl acetate = 5 : 1). Yellow solid, mp 168–170 °C. <sup>1</sup>H NMR (600 MHz, CDCl<sub>3</sub>) δ 8.74 (dd, *J* = 8.4, 1.8 Hz, 1H), 7.98 (d, *J* = 8.2 Hz, 1H), 7.91–7.85 (m, 1H), 7.73–7.69 (m, 1H), 7.39 (ddd, *J* = 13.0, 7.9, 1.1 Hz, 1H), 7.32 (d, *J* = 7.9 Hz, 1H), 3.61 (s, 3H), 2.992.94 (m, 1H), 2.79–2.75 (m, 1H), 2.33–2.22 (m, 2H), 1.68 (s, 3H). <sup>13</sup>C NMR (151 MHz, CDCl<sub>3</sub>) δ 172.3, 160.5 (d, *J* = 255.6 Hz), 158.6, 146.5 (d, *J* = 2.5 Hz), 138.2, 132.6 (d, *J* = 1.9 Hz), 131.5 (d, *J* = 5.0 Hz), 128.8 (d, *J* = 10.7 Hz), 125.9 (d, *J* = 3.5 Hz), 121.5 (d, *J* = 23.3 Hz), 119.2, 113.4 (d, *J* = 24.0 Hz), 112.9 (d, *J* = 9.0 Hz), 112.4, 111.7, 50.7, 34.1, 30.3, 30.0, 13.7. IR (film) ν 2942, 2248, 1670, 1607, 1463, 1340, 1286, 1201, 828, 768, 732 cm<sup>-1</sup>. HRMS (ESI): calc. for C<sub>20</sub>H<sub>16</sub>FN<sub>3</sub>O (M+H)<sup>+</sup>, 334.1350; found, 334.1358.

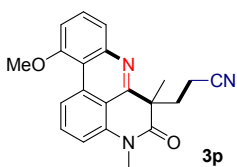

**3-(11-methoxy-4,6-dimethyl-5-oxo-5,6-dihydro-4H-pyrido[4,3,2-*gh*]phenanthridin-6-yl)propanenitrile.** Purified by column chromatography (petroleum ether : ethyl acetate = 3 : 1). Yellow solid, mp 129–132 °C. <sup>1</sup>H NMR (600 MHz, CDCl<sub>3</sub>) δ 9.28 (d, *J* = 8.6 Hz, 1H), 7.86–7.74 (m, 2H), 7.70 (t, *J* = 8.0 Hz, 1H), 7.26 (d, *J* = 7.7 Hz, 1H), 7.16 (d, *J* = 7.9 Hz, 1H), 4.15 (s, 3H), 3.60 (s, 3H), 3.01–2.91 (m, 1H), 2.82–2.70 (m, 1H), 2.27 (t, *J* = 8.0 Hz, 2H), 1.66 (s, 3H). <sup>13</sup>C NMR (151 MHz, CDCl<sub>3</sub>) δ 172.4, 158.3, 157.6, 146.7, 137.7, 133.4, 131.7, 128.9, 122.60, 122.57, 119.4, 113.7, 112.4, 110.9, 108.0, 55.9, 50.4, 34.0, 30.3, 30.0, 13.7. IR (film) ν 3164, 3003, 2944,

2253, 1633, 1421, 1324, 1039, 918, 750  $\text{cm}^{-1}$ . HRMS (ESI): calc. for  $\text{C}_{21}\text{H}_{19}\text{N}_3\text{O}_2$  ( $\text{M}+\text{H}$ ) $^+$ , 346.1550; found, 346.1552.

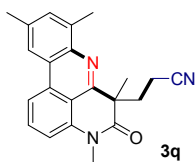

**3-(4,6,8,10-tetramethyl-5-oxo-5,6-dihydro-4H-pyrido[4,3,2-gh]phenanthridin-6-yl)propanenitrile.** Purified by column chromatography (petroleum ether : ethyl acetate = 6 : 1). Yellow solid, mp 104–105 °C.  $^1\text{H}$  NMR (500 MHz,  $\text{CDCl}_3$ )  $\delta$  8.28 (d,  $J$  = 8.3 Hz, 1H), 8.18 (s, 1H), 7.80 (t,  $J$  = 8.1 Hz, 1H), 7.48 (s, 1H), 7.20 (d,  $J$  = 7.9 Hz, 1H), 3.59 (s, 3H), 3.01–2.90 (m, 1H), 2.82 (s, 3H), 2.79–2.71 (m, 1H), 2.59 (s, 3H), 2.35–2.19 (m, 2H), 1.68 (s, 3H).  $^{13}\text{C}$  NMR (126 MHz,  $\text{CDCl}_3$ )  $\delta$  172.8, 154.7, 141.8, 138.3, 137.3, 136.6, 133.5, 131.8, 131.5, 122.5, 119.9, 119.4, 116.7, 111.9, 110.6, 50.8, 34.5, 30.5, 29.9, 21.9, 18.1, 13.6. IR (film)  $\nu$  2972, 2919, 2069, 1637, 1461, 1404, 1067, 1048, 878, 726  $\text{cm}^{-1}$ . HRMS (ESI): calc. for  $\text{C}_{22}\text{H}_{21}\text{N}_3\text{O}$  ( $\text{M}+\text{H}$ ) $^+$ , 344.1757; found, 344.1763.

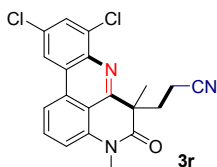

**3-(8,10-dichloro-4,6-dimethyl-5-oxo-5,6-dihydro-4H-pyrido[4,3,2-gh]phenanthridin-6-yl)propanenitrile.** Purified by column chromatography (petroleum ether : ethyl acetate = 3 : 1). White solid, mp 187–189 °C.  $^1\text{H}$  NMR (600 MHz,  $\text{CDCl}_3$ )  $\delta$  8.41 (d,  $J$  = 1.9 Hz, 1H), 8.19 (d,  $J$  = 8.3 Hz, 1H), 7.90 (t,  $J$  = 8.1 Hz, 1H), 7.84 (t,  $J$  = 2.0 Hz, 1H), 7.32 (d,  $J$  = 7.9 Hz, 1H), 3.61 (s, 1H), 3.02–2.95 (m, 1H), 2.79–2.71 (m, 1H), 2.41–2.30 (m, 1H), 1.71 (s, 1H).  $^{13}\text{C}$  NMR (126 MHz,  $\text{CDCl}_3$ )  $\delta$  172.4, 158.6, 139.7, 138.8, 135.5, 132.9, 132.4, 132.3, 129.9, 125.0, 121.1, 119.0, 116.6, 112.3, 112.2, 51.0, 34.2, 30.3, 30.0, 13.6. IR (film)  $\nu$  2976, 2901, 2086, 1638, 1394, 1251, 1077, 1048, 880, 623  $\text{cm}^{-1}$ . HRMS (ESI): calc. for  $\text{C}_{20}\text{H}_{15}\text{Cl}_2\text{N}_3\text{O}$  ( $\text{M}+\text{H}$ ) $^+$ , 384.0665; found, 384.0666.

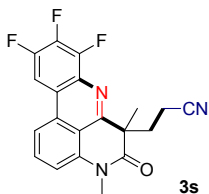

**3-(8,9,10-trifluoro-4,6-dimethyl-5-oxo-5,6-dihydro-4H-pyrido[4,3,2-gh]phenanthridin-6-yl)propanenitrile.** Purified by column chromatography (petroleum ether : ethyl acetate = 3 : 1). Yellow solid, mp 175–176 °C.  $^1\text{H}$  NMR (500 MHz,  $\text{CDCl}_3$ )  $\delta$  8.09 (d,  $J$  = 8.3 Hz, 1H), 8.07–8.02 (m, 1H), 7.91 (t,  $J$  = 8.1 Hz, 1H), 7.32 (d,  $J$  = 7.9 Hz, 1H), 3.62 (s, 3H), 3.01–2.91 (m, 1H), 2.80–2.70 (m, 1H), 2.38–2.23 (m, 2H), 1.72 (s, 3H).  $^{13}\text{C}$  NMR (126 MHz,  $\text{CDCl}_3$ )  $\delta$  172.2, 158.8, 150.3 (ddd,  $J_{\text{C-F}}$  = 252.0, 12.6, 2.5 Hz), 146.5 (ddd,  $J_{\text{C-F}}$  = 259.6, 7.6, 5.0 Hz), 140.5 (ddd,  $J_{\text{C-F}}$  = 254.5, 17.6, 13.9 Hz), 138.9, 133.1, 132.5 (d,  $J_{\text{C-F}}$  = 8.4 Hz), 132.1 (d,  $J_{\text{C-F}}$  = 2.5 Hz), 119.4 (d,  $J_{\text{C-F}}$  = 8.5 Hz),

118.8, 116.4, 112.2, 112.0, 103.9 (dd,  $J_{C-F} = 18.9, 4.7$  Hz), 50.9, 34.4, 30.2, 30.0, 13.6. IR (film)  $\nu$  2974, 2901, 2026, 1637, 1621, 1394, 1296, 1078, 1050, 880, 739  $\text{cm}^{-1}$ . HRMS (ESI): calc. for  $\text{C}_{20}\text{H}_{14}\text{F}_3\text{N}_3\text{O}$  ( $\text{M}+\text{H}$ ) $^+$ , 370.1162; found, 370.1166.

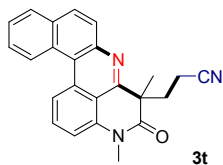

**3-(4,6-dimethyl-5-oxo-5,6-dihydro-4H-benzo[a]pyrido[4,3,2-gh]phenanthridin-6-yl)propanenitrile.** Purified by column chromatography (petroleum ether : ethyl acetate = 4 : 1). Yellow solid, mp 116–117 °C.  $^1\text{H}$  NMR (600 MHz,  $\text{CDCl}_3$ )  $\delta$  9.05 (d,  $J = 8.4$  Hz, 1H), 8.81 (d,  $J = 8.6$  Hz, 1H), 8.08–8.05 (m, 3H), 7.88 (t,  $J = 8.2$  Hz, 1H), 7.73 (t,  $J = 7.4$  Hz, 1H), 7.68 (t,  $J = 7.4$  Hz, 1H), 7.27 (d,  $J = 7.8$  Hz, 1H), 3.65 (s, 3H), 3.03–2.98 (m, 1H), 2.83–2.78 (m, 1H), 2.29 (t,  $J = 7.9$  Hz, 2H), 1.71 (s, 3H).  $^{13}\text{C}$  NMR (151 MHz,  $\text{CDCl}_3$ )  $\delta$  172.5, 156.6, 144.9, 138.2, 133.5, 133.3, 131.6, 130.4, 129.7, 128.9, 128.1, 127.5, 126.8, 126.5, 121.2, 119.5, 119.3, 113.4, 110.2, 50.5, 34.4, 30.2, 30.1, 13.7. IR (film)  $\nu$  2919, 2901, 2251, 2077, 1667, 1619 1455, 1426, 1156, 874, 755  $\text{cm}^{-1}$ . HRMS (ESI): calc. for  $\text{C}_{24}\text{H}_{19}\text{N}_3\text{O}$  ( $\text{M}+\text{H}$ ) $^+$ , 366.1601; found, 366.1606.

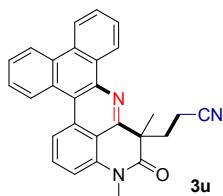

**3-(4,6-dimethyl-5-oxo-5,6-dihydro-4H-dibenzo[a,c]pyrido[4,3,2-gh]phenanthridin-6-yl)propanenitrile.** Purified by column chromatography (petroleum ether : ethyl acetate = 5 : 1). Yellow solid, mp 86–88 °C.  $^1\text{H}$  NMR (600 MHz,  $\text{CDCl}_3$ )  $\delta$  9.34–9.28 (m, 1H), 8.87 (d,  $J = 8.1$  Hz, 1H), 8.75 (d,  $J = 8.1$  Hz, 1H), 8.68–8.59 (m, 2H), 7.85–7.77 (m, 3H), 7.75–7.72 (m, 1H), 7.70–7.67 (m, 1H), 7.21 (d,  $J = 7.8$  Hz, 1H), 3.64 (s, 3H), 3.13–3.05 (m, 1H), 2.92–2.83 (m, 1H), 2.40–2.28 (m, 2H), 1.78 (s, 3H).  $^{13}\text{C}$  NMR (126 MHz,  $\text{CDCl}_3$ )  $\delta$  172.5, 155.7, 142.3, 138.0, 133.4, 131.54, 131.04, 130.95, 130.5, 128.8, 128.7, 128.5, 127.7, 127.3, 126.5, 125.4, 123.7, 122.4, 121.4, 119.2, 118.4, 113.9, 109.8, 50.6, 34.7, 30.3, 30.0, 13.7. IR (film)  $\nu$  2976, 2910, 2026, 1625, 1402, 1255, 1055, 888, 741, 627  $\text{cm}^{-1}$ . HRMS (ESI): calc. for  $\text{C}_{28}\text{H}_{21}\text{N}_3\text{O}$  ( $\text{M}+\text{H}$ ) $^+$ , 416.1757; found, 416.1758.

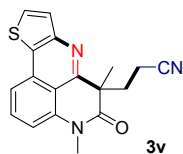

**3-(4,6-dimethyl-5-oxo-5,6-dihydro-4H-benzo[de]thieno[3,2-b][1,6]naphthyridin-6-yl)propanenitrile.** Purified by column chromatography (petroleum ether : ethyl acetate = 4 : 1). Yellow solid, mp 169–170 °C.  $^1\text{H}$  NMR (600 MHz,  $\text{CDCl}_3$ )  $\delta$  7.82–7.71 (m, 3H), 7.67 (d,  $J = 5.4$  Hz, 1H), 7.12 (dd,  $J = 6.8, 1.6$  Hz, 1H), 3.59 (s, 3H), 2.92–2.88

(m, 1H), 2.81–2.76 (m, 1H), 2.27–2.12 (m, 2H), 1.70 (s, 3H).  $^{13}\text{C}$  NMR (151 MHz,  $\text{CDCl}_3$ )  $\delta$  172.7, 155.9, 152.0, 138.6, 132.3, 132.2, 128.0, 127.8, 126.1, 119.1, 117.3, 111.2, 109.6, 50.5, 35.0, 30.6, 29.9, 13.7. IR (film)  $\nu$  3117, 2923, 2250, 1667, 1619, 1569, 1460, 1096, 814, 748, 649  $\text{cm}^{-1}$ . HRMS (ESI): calc. for  $\text{C}_{18}\text{H}_{15}\text{N}_3\text{OS}$  ( $\text{M}+\text{H}$ ) $^+$ , 322.1009; found, 322.1013.

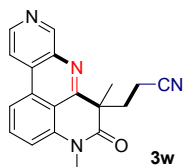

**3-(4,6-dimethyl-5-oxo-5,6-dihydro-4H-benzo[de]pyrido[3,4-b][1,6]naphthyridin-6-yl)propanenitrile.** Purified by column chromatography (petroleum ether : ethyl acetate = 1 : 1). White solid, mp 128–129 °C.  $^1\text{H}$  NMR (600 MHz,  $\text{CDCl}_3$ )  $\delta$  9.50 (s, 1H), 8.80 (d,  $J$  = 5.1 Hz, 1H), 8.38–8.24 (m, 2H), 7.96 (t,  $J$  = 8.1 Hz, 1H), 7.40 (d,  $J$  = 7.9 Hz, 1H), 3.63 (s, 3H), 3.01–2.95 (m, 1H), 2.82–2.76 (m, 1H), 2.34–2.25 (m, 2H), 1.72 (s, 3H).  $^{13}\text{C}$  NMR (151 MHz,  $\text{CDCl}_3$ )  $\delta$  172.3, 159.8, 153.2, 145.4, 139.7, 138.7, 133.0, 131.6, 127.8, 119.0, 116.9, 115.7, 113.4, 113.2, 51.0, 34.1, 30.5, 30.1, 13.7. IR (film)  $\nu$  2988, 2900, 1406, 1393, 1250, 1066, 1056, 891, 743  $\text{cm}^{-1}$ . HRMS (ESI): calc. for  $\text{C}_{19}\text{H}_{16}\text{N}_4\text{O}$  ( $\text{M}+\text{H}$ ) $^+$ , 317.1397; found, 317.1400.

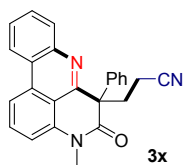

**3-(4-methyl-5-oxo-6-phenyl-5,6-dihydro-4H-pyrido[4,3,2-gh]phenanthridin-6-yl)propanenitrile.** Purified by column chromatography (petroleum ether : ethyl acetate = 4 : 1). Yellow solid, mp 151–152 °C.  $^1\text{H}$  NMR (600 MHz,  $\text{CDCl}_3$ )  $\delta$  8.60–8.50 (m, 1H), 8.29 (d,  $J$  = 8.2 Hz, 1H), 8.24 (dd,  $J$  = 8.2, 0.9 Hz, 1H), 7.85–7.75 (m, 2H), 7.74–7.68 (m, 1H), 7.19 (d,  $J$  = 7.8 Hz, 1H), 7.16–7.06 (m, 3H), 7.05–6.98 (m, 2H), 3.61 (s, 3H), 3.45–3.35 (m, 1H), 3.26–3.16 (m, 1H), 2.61–2.44 (m, 2H).  $^{13}\text{C}$  NMR (151 MHz,  $\text{CDCl}_3$ )  $\delta$  170.5, 155.3, 144.6, 142.2, 138.4, 133.4, 132.1, 130.4, 129.5, 128.7, 127.6, 127.5, 126.3, 123.0, 122.6, 119.7, 116.5, 113.2, 111.3, 59.3, 32.9, 30.3, 14.4. IR (film)  $\nu$  2922, 2848, 2025, 1637, 1511, 1399, 1148 1031, 875, 757, 625  $\text{cm}^{-1}$ . HRMS (ESI): calc. for  $\text{C}_{25}\text{H}_{19}\text{N}_3\text{O}$  ( $\text{M}+\text{Na}$ ) $^+$ , 400.1420; found, 400.1419.

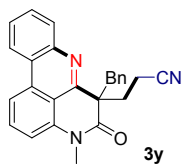

**3-(6-benzyl-4-methyl-5-oxo-5,6-dihydro-4H-pyrido[4,3,2-gh]phenanthridin-6-yl)propanenitrile.** Purified by column chromatography (petroleum ether : ethyl acetate = 5 : 1). White solid, mp 130–131 °C.  $^1\text{H}$  NMR (600 MHz,  $\text{CDCl}_3$ )  $\delta$  8.52 (d,  $J$  = 8.2 Hz, 1H), 8.23 (d,  $J$  = 8.2 Hz, 1H), 8.15 (d,  $J$  = 8.3 Hz, 1H), 7.82 (t,  $J$  = 7.5 Hz, 1H), 7.70

(t,  $J = 7.6$  Hz, 1H), 7.61 (t,  $J = 8.1$  Hz, 1H), 6.85 (t,  $J = 7.3$  Hz, 1H), 6.80 (d,  $J = 7.9$  Hz, 1H), 6.74 (t,  $J = 7.6$  Hz, 2H), 6.39 (d,  $J = 7.6$  Hz, 2H), 3.41 (d,  $J = 12.4$  Hz, 1H), 3.35–3.34 (m, 4H), 3.25–3.19 (m, 1H), 3.02–2.92 (m, 1H), 2.31–2.19 (m, 2H).  $^{13}\text{C}$  NMR (151 MHz,  $\text{CDCl}_3$ )  $\delta$  171.0, 156.1, 144.7, 137.8, 135.1, 132.4, 131.8, 129.9, 129.3, 129.2, 127.3, 127.1, 126.7, 122.74, 122.69, 119.2, 116.1, 113.9, 110.4, 57.0, 51.9, 33.9, 29.4, 13.7. IR (film)  $\nu$  2926, 2249, 2023, 1661, 1613, 1589, 1495, 1418, 1155, 752, 705  $\text{cm}^{-1}$ . HRMS (ESI): calc. for  $\text{C}_{26}\text{H}_{21}\text{N}_3\text{O}$  ( $\text{M}+\text{H}$ ) $^+$ , 392.1757; found, 392.1764.

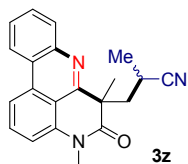

**3-(4,6-dimethyl-5-oxo-5,6-dihydro-4H-pyrido[4,3,2-gh]phenanthridin-6-yl)-2-methylpropanenitrile.** Purified by column chromatography (petroleum ether : ethyl acetate = 5 : 1). Yellow solid, mp 124–126 °C.  $^1\text{H}$  NMR (600 MHz,  $\text{CDCl}_3$ )  $\delta$  8.57–8.54 (m, 1H), 8.32–8.29 (m, 1H), 8.17–8.10 (m, 1H), 7.88–7.83 (m, 1H), 7.78–7.76 (m, 1H), 7.69–7.65 (m, 1H), 7.27–7.25 (m, 1H), 3.621–3.618 (m, 3H), 3.14–2.86 (m, 1H), 2.77–2.67 (m, 1H), 2.61–2.52 (m, 1H), 1.73–1.72 (m, 3H), 1.24–1.23 (m, 3H).  $^{13}\text{C}$  NMR (151 MHz,  $\text{CDCl}_3$ )  $\delta$  173.1, 172.8, 158.2, 157.5, 144.8, 144.7, 138.8, 138.3, 133.5, 133.4, 132.3, 131.8, 129.9, 129.7, 129.3, 129.2, 126.9, 122.9, 122.7, 122.6, 122.2, 122.0, 116.7, 116.2, 112.2, 112.1, 111.2, 110.9, 50.4, 50.1, 43.2, 42.8, 31.7, 31.4, 29.95, 29.90, 22.22, 22.17, 19.0, 18.9. IR (film)  $\nu$  2957, 2922, 2851, 1670, 1589, 1464, 1360, 1340, 1165, 1081, 794  $\text{cm}^{-1}$ . HRMS (ESI): calc. for  $\text{C}_{21}\text{H}_{19}\text{N}_3\text{O}$  ( $\text{M}+\text{H}$ ) $^+$ , 330.1601; found, 330.1599.

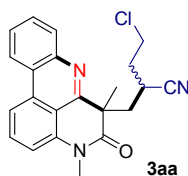

**4-chloro-2-((4,6-dimethyl-5-oxo-5,6-dihydro-4H-pyrido[4,3,2-gh]phenanthridin-6-yl)methyl)butanenitrile.** Purified by column chromatography (petroleum ether : ethyl acetate = 4 : 1). Yellow solid, mp 208–209 °C.  $^1\text{H}$  NMR (600 MHz,  $\text{CDCl}_3$ )  $\delta$  8.58–8.52 (m, 1H), 8.34–8.29 (m, 1H), 8.19–8.08 (m, 1H), 7.89–7.83 (m, 1H), 7.79–7.75 (m, 1H), 7.71–7.65 (m, 1H), 7.28–7.27 (m,  $J = 7.3$  Hz, 1H), 3.66–3.56 (m, 4H), 3.55–3.49 (m, 1H), 3.23–2.97 (m, 1H), 2.94–2.88 (m, 1H), 2.85–2.55 (m, 1H), 2.12–2.02 (m, 1H), 2.00–1.91 (m, 1H), 1.71–1.70 (m, 3H).  $^{13}\text{C}$  NMR (151 MHz,  $\text{CDCl}_3$ )  $\delta$  172.8, 172.7, 157.8, 157.4, 144.8, 144.6, 138.7, 138.2, 133.6, 133.5, 132.3, 131.9, 129.8, 129.7, 129.34, 129.31, 127.01, 126.98, 122.93, 122.88, 122.67, 122.65, 120.2, 116.7, 116.3, 112.2, 112.1, 111.2, 111.1, 50.5, 50.1, 41.3, 41.2, 40.3, 39.9, 35.8, 35.7, 32.0, 31.4, 30.01, 29.97, 25.7, 25.5. IR (film)  $\nu$  2994, 1770, 1758, 1463, 1454, 1373, 1245, 1056, 836, 772  $\text{cm}^{-1}$ . HRMS (ESI): calc. for  $\text{C}_{22}\text{H}_{20}\text{ClN}_3\text{O}$  ( $\text{M}+\text{H}$ ) $^+$ , 378.1368; found, 378.1369.

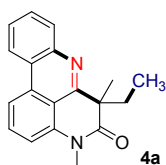

**6-ethyl-4,6-dimethyl-4H-pyrido[4,3,2-*gh*]phenanthridin-5(6H)-one.** Purified by column chromatography (petroleum ether : ethyl acetate = 8 : 1). Yellow solid, mp 133–134 °C. <sup>1</sup>H NMR (500 MHz, CDCl<sub>3</sub>) δ 8.51 (d, *J* = 8.2 Hz, 1H), 8.25 (d, *J* = 8.3 Hz, 1H), 8.14 (d, *J* = 8.2 Hz, 1H), 7.79 (t, *J* = 7.9 Hz, 1H), 7.74 (t, *J* = 7.5 Hz, 1H), 7.63 (t, *J* = 7.6 Hz, 1H), 7.19 (d, *J* = 7.9 Hz, 1H), 3.58 (s, 3H), 2.41 (dq, *J* = 14.7, 7.4 Hz, 1H), 2.29 (dq, *J* = 14.5, 7.3 Hz, 1H), 1.81 (s, 3H), 0.65 (t, *J* = 7.4 Hz, 3H). <sup>13</sup>C NMR (126 MHz, CDCl<sub>3</sub>) δ 174.2, 159.8, 145.0, 139.0, 133.1, 131.6, 129.8, 129.0, 126.5, 122.6, 122.5, 115.9, 112.6, 110.5, 52.0, 36.4, 29.6, 27.7, 9.8. IR (film) ν 2964, 2933, 1664, 1588, 1570, 1460, 1354, 1330, 757, 744, 644 cm<sup>-1</sup>. HRMS (ESI): calc. for C<sub>19</sub>H<sub>18</sub>N<sub>2</sub>O (M+H)<sup>+</sup>, 291.1492; found, 291.1494.

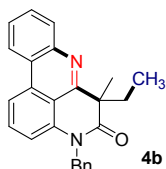

**4-benzyl-6-ethyl-6-methyl-4H-pyrido[4,3,2-*gh*]phenanthridin-5(6H)-one.** Purified by column chromatography (petroleum ether : ethyl acetate = 9 : 1). Yellow solid, mp 144–145 °C. <sup>1</sup>H NMR (600 MHz, CDCl<sub>3</sub>) δ 8.50 (d, *J* = 8.1 Hz, 1H), 8.22 (d, *J* = 8.2 Hz, 1H), 8.16 (d, *J* = 8.2 Hz, 1H), 7.75 (t, *J* = 7.5 Hz, 1H), 7.69–7.60 (m, 2H), 7.37–7.29 (m, 4H), 7.28–7.22 (m, 1H), 7.11 (d, *J* = 7.9 Hz, 1H), 5.44 (d, *J* = 41.9 Hz, 2H), 2.60–2.45 (m, 1H), 2.45–2.31 (m, 1H), 1.87 (s, 3H), 0.76 (t, *J* = 7.4 Hz, 3H). <sup>13</sup>C NMR (151 MHz, CDCl<sub>3</sub>) δ 174.6, 159.6, 144.9, 138.0, 136.4, 133.2, 131.6, 129.8, 129.1, 128.9, 127.2, 126.5, 126.4, 122.7, 122.5, 116.1, 112.7, 111.8, 52.2, 46.2, 35.8, 28.2, 10.0. IR (film) ν 3063, 2968, 2930, 1675, 1588, 1570, 1463, 1363, 740, 703, 650 cm<sup>-1</sup>. HRMS (ESI): calc. for C<sub>25</sub>H<sub>22</sub>N<sub>2</sub>O (M+H)<sup>+</sup>, 367.1805; found, 367.1808.

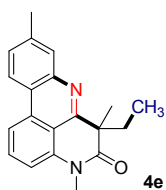

**6-ethyl-4,6,9-trimethyl-4H-pyrido[4,3,2-*gh*]phenanthridin-5(6H)-one.** Purified by column chromatography (petroleum ether : ethyl acetate = 8 : 1). Yellow solid, mp 120–121 °C. <sup>1</sup>H NMR (600 MHz, CDCl<sub>3</sub>) δ 8.41 (d, *J* = 8.3 Hz, 1H), 8.23 (d, *J* = 8.3 Hz, 1H), 7.96 (s, 1H), 7.79 (t, *J* = 8.1 Hz, 1H), 7.47 (dd, *J* = 8.3, 1.4 Hz, 1H), 7.17 (d, *J* = 7.9 Hz, 1H), 3.59 (s, 3H), 2.60 (s, 3H), 2.45–2.35 (m, 1H), 2.35–2.24 (m, 1H), 1.79 (s, 3H), 0.65 (t, *J* = 7.4 Hz, 3H). <sup>13</sup>C NMR (151 MHz, CDCl<sub>3</sub>) δ 174.3, 159.9, 145.2, 139.4, 139.0, 133.2, 131.6, 129.3, 128.3, 122.3, 120.4, 115.8, 112.4, 110.1, 52.0, 36.5, 29.6, 27.8, 21.5, 9.8. IR (film) ν 2958, 2919, 2850, 1662, 1587, 1567, 1467, 1357, 1336, 801, 768 cm<sup>-1</sup>. HRMS (ESI): calc. for C<sub>20</sub>H<sub>20</sub>N<sub>2</sub>O (M+H)<sup>+</sup>, 305.1648; found, 305.1648.

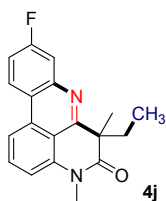

**6-ethyl-9-fluoro-4,6-dimethyl-4H-pyrido[4,3,2-gh]phenanthridin-5(6H)-one.** Purified by column chromatography (petroleum ether : ethyl acetate = 8 : 1). White solid, mp 158–159 °C. <sup>1</sup>H NMR (600 MHz, CDCl<sub>3</sub>) δ 8.50 (dd, *J* = 9.1, 5.9 Hz, 1H), 8.19 (d, *J* = 8.3 Hz, 1H), 7.82 (t, *J* = 8.1 Hz, 1H), 7.79 (dd, *J* = 9.9, 2.7 Hz, 1H), 7.40 (ddd, *J* = 9.0, 8.1, 2.7 Hz, 1H), 7.20 (d, *J* = 7.9 Hz, 1H), 3.59 (s, 3H), 2.45–2.34 (m, 1H), 2.34–2.24 (m, 1H), 1.79 (s, 3H), 0.65 (t, *J* = 7.4 Hz, 3H). <sup>13</sup>C NMR (151 MHz, CDCl<sub>3</sub>) δ 174.1, 163.0 (d, *J*<sub>C-F</sub> = 249.0 Hz), 161.5, 146.5 (d, *J*<sub>C-F</sub> = 12.1 Hz), 139.2, 133.0, 132.1, 124.5 (d, *J*<sub>C-F</sub> = 9.4 Hz), 119.4, 115.71, 115.69 (d, *J*<sub>C-F</sub> = 23.9 Hz), 114.2 (d, *J*<sub>C-F</sub> = 20.3 Hz), 112.3, 110.4, 52.2, 36.4, 29.7, 27.7, 9.8. IR (film) ν 2961, 2928, 2850, 1671, 1589, 1578, 1466, 1338, 1180, 791, 767 cm<sup>-1</sup>. HRMS (ESI): calc. for C<sub>19</sub>H<sub>17</sub>FN<sub>2</sub>O (M+H)<sup>+</sup>, 309.1398; found, 309.1415.

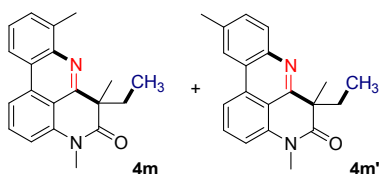

**6-ethyl-4,6,8-trimethyl-4H-pyrido[4,3,2-gh]phenanthridin-5(6H)-one (4m); 6-ethyl-4,6,10-trimethyl-4H-pyrido[4,3,2-gh]phenanthridin-5(6H)-one (4m').** Purified by column chromatography (petroleum ether : ethyl acetate = 9 : 1), products **4m** and **4m'** can not be separated column chromatography on silica gel. White solid, mp 108–110 °C. <sup>1</sup>H NMR (600 MHz, CDCl<sub>3</sub>) δ 8.37 (d, *J* = 8.2 Hz, 1H), 8.29 (s, 0.5H), 8.26–8.21 (m, 1.5H), 8.03 (d, *J* = 8.3 Hz, 0.5H), 7.77 (t, *J* = 8.1 Hz, 1.5H), 7.60 (d, *J* = 7.0 Hz, 1H), 7.56 (dd, *J* = 8.4, 1.6 Hz, 0.5H), 7.53–7.49 (m, 1H), 7.17 (d, *J* = 7.9 Hz, 1.4H), 3.58 (s, 3H), 3.58 (s, 1.4H), 2.86 (s, 3H), 2.61 (s, 1.4H), 2.46–2.35 (m, 2H), 2.33–2.24 (m, 2H), 1.80 (s, 3H), 1.80 (s, 1.4H), 0.67–0.63 (m, 4.4H). <sup>13</sup>C NMR (151 MHz, CDCl<sub>3</sub>) δ 174.4, 174.3, 158.7, 158.1, 143.6, 143.4, 139.0, 138.9, 137.7, 136.3, 133.4, 132.8, 131.3, 130.8, 129.6, 129.5, 126.1, 122.5, 122.3, 122.0, 120.3, 116.2, 115.9, 112.7, 112.4, 110.4, 110.2, 52.2, 51.9, 36.7, 36.5, 29.6, 29.6, 28.0, 27.6, 21.9, 18.2, 9.8, 9.7. IR (film) ν 2961, 2925, 1672, 1610, 1589, 1577, 1463, 1339, 829, 774, 750 cm<sup>-1</sup>. HRMS (ESI): calc. for C<sub>20</sub>H<sub>20</sub>N<sub>2</sub>O (M+H)<sup>+</sup>, 305.1648; found, 305.1650.

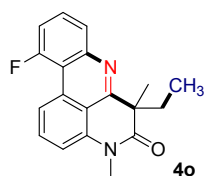

**6-ethyl-11-fluoro-4,6-dimethyl-4H-pyrido[4,3,2-gh]phenanthridin-5(6H)-one.** Purified by column chromatography (petroleum ether : ethyl acetate = 10 : 1). Yellow solid, mp 106–107 °C. <sup>1</sup>H NMR (600 MHz,

CDCl<sub>3</sub>)  $\delta$  8.73 (d,  $J$  = 8.5 Hz, 1H), 7.99 (d,  $J$  = 8.2 Hz, 1H), 7.87 (t,  $J$  = 8.2 Hz, 1H), 7.69 (dd,  $J$  = 13.6, 8.0 Hz, 1H), 7.37 (dd,  $J$  = 13.1, 7.9 Hz, 1H), 7.30 (d,  $J$  = 8.0 Hz, 1H), 3.63 (s, 3H), 2.44–2.38 (m, 1H), 2.34–2.28 (m, 1H), 1.82 (s, 3H), 0.68 (t,  $J$  = 7.4 Hz, 3H). <sup>13</sup>C NMR (151 MHz, CDCl<sub>3</sub>)  $\delta$  173.9, 161.0, 160.6 (d,  $J_{C-F}$  = 255.3 Hz), 146.8 (d,  $J_{C-F}$  = 2.7 Hz), 138.7, 132.2 (d,  $J_{C-F}$  = 2.1 Hz), 131.1 (d,  $J_{C-F}$  = 4.9 Hz), 128.5 (d,  $J_{C-F}$  = 10.8 Hz), 125.8 (d,  $J_{C-F}$  = 3.5 Hz), 121.0 (d,  $J_{C-F}$  = 23.2 Hz), 113.0, 112.8 (d,  $J_{C-F}$  = 23.9 Hz), 112.8, 111.3 (d,  $J_{C-F}$  = 1.3 Hz), 51.9, 36.4, 29.8, 27.7, 9.8. IR (film)  $\nu$  2922, 2851, 1667, 1618, 1586 1463, 1343, 1164, 732, 517 cm<sup>-1</sup>. HRMS (ESI): calc. for C<sub>19</sub>H<sub>17</sub>FN<sub>2</sub>O (M+H)<sup>+</sup>, 309.1398; found, 309.1395.

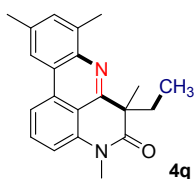

**6-ethyl-4,6,8,10-tetramethyl-4H-pyrido[4,3,2-*g*]phenanthridin-5(6H)-one.** Purified by column chromatography (petroleum ether : ethyl acetate = 10 : 1). Yellow solid, mp 165–166 °C. <sup>1</sup>H NMR (600 MHz, CDCl<sub>3</sub>)  $\delta$  8.25 (d,  $J$  = 8.3 Hz, 1H), 8.17 (s, 1H), 7.76 (t,  $J$  = 8.1 Hz, 1H), 7.46 (s, 1H), 7.17 (d,  $J$  = 7.8 Hz, 1H), 3.59 (s, 3H), 2.82 (s, 3H), 2.58 (s, 3H), 2.45–2.36 (m, 1H), 2.33–2.24 (m, 1H), 1.79 (s, 3H), 0.64 (t,  $J$  = 7.4 Hz, 3H). <sup>13</sup>C NMR (151 MHz, CDCl<sub>3</sub>)  $\delta$  174.6, 157.0, 142.0, 138.9, 137.3, 135.8, 133.1, 131.4, 131.1, 122.2, 119.8, 116.3, 112.5, 110.1, 52.1, 36.7, 29.6, 28.1, 21.9, 18.1, 9.8. IR (film)  $\nu$  2964, 2922, 1660, 1611, 1588, 1573, 1458, 1355, 1337, 820, 767 cm<sup>-1</sup>. HRMS (ESI): calc. for C<sub>22</sub>H<sub>22</sub>N<sub>2</sub>O (M+H)<sup>+</sup>, 319.1805; found, 319.1821.

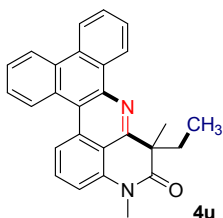

**6-ethyl-4,6-dimethyl-4H-dibenzo[*a,c*]pyrido[4,3,2-*g*]phenanthridin-5(6H)-one.** Purified by column chromatography (petroleum ether : ethyl acetate = 8 : 1). Yellow solid, mp 184–185 °C. <sup>1</sup>H NMR (600 MHz, CDCl<sub>3</sub>)  $\delta$  9.43–9.37 (m, 1H), 8.90 (d,  $J$  = 7.8 Hz, 1H), 8.76 (d,  $J$  = 7.8 Hz, 1H), 8.68–8.64 (m, 1H), 8.62 (d,  $J$  = 8.6 Hz, 1H), 7.83–7.75 (m, 3H), 7.73 (dt,  $J$  = 7.2, 1.2 Hz, 1H), 7.69 (dt,  $J$  = 8.4, 1.2 Hz, 1H), 7.18 (d,  $J$  = 7.7 Hz, 1H), 3.65 (s, 3H), 2.58–2.50 (m, 1H), 2.44–2.35 (m, 1H), 1.91 (s, 3H), 0.71 (t,  $J$  = 7.4 Hz, 3H). <sup>13</sup>C NMR (151 MHz, CDCl<sub>3</sub>)  $\delta$  174.3, 158.2, 142.3, 138.7, 133.1, 131.1, 131.0, 130.9, 130.8, 128.8, 128.7, 128.4, 127.4, 126.9, 126.4, 125.7, 123.6, 122.3, 120.9, 117.8, 114.5, 109.2, 52.0, 36.5, 29.7, 28.1, 9.9. IR (film)  $\nu$  2967, 2926, 1671, 1581, 1566, 1452, 1375, 1337, 1066, 760, 729 cm<sup>-1</sup>. HRMS (ESI): calc. for C<sub>27</sub>H<sub>22</sub>N<sub>2</sub>O (M+H)<sup>+</sup>, 391.1805; found, 391.1824.



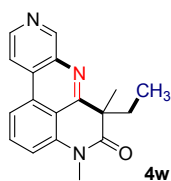

**6-ethyl-4,6-dimethyl-4H-benzo[de]pyrido[3,4-b][1,6]naphthyridin-5(6H)-one.** Purified by column chromatography (petroleum ether : ethyl acetate = 1 : 1). Yellow solid, mp 154–155 °C. <sup>1</sup>H NMR (600 MHz, CDCl<sub>3</sub>) δ 9.49 (s, 1H), 8.76 (d, *J* = 5.5 Hz, 1H), 8.29–8.27 (m, 2H), 7.92 (t, *J* = 8.1 Hz, 1H), 7.36 (d, *J* = 7.9 Hz, 1H), 3.61 (s, 3H), 2.46–2.40 (m, 1H), 2.35–2.29 (m, 1H), 1.82 (s, 3H), 0.66 (t, *J* = 7.4 Hz, 1H). <sup>13</sup>C NMR (151 MHz, CDCl<sub>3</sub>) δ 173.9, 162.1, 153.3, 144.9, 140.0, 139.2, 132.5, 131.2, 127.5, 116.3, 115.5, 113.9, 112.7, 52.3, 36.5, 29.7, 27.8, 9.8. IR (film) ν 2965, 2924, 1668, 1610, 1609, 1590, 1466, 1358, 1079, 913, 745 cm<sup>-1</sup>. HRMS (ESI): calc. for C<sub>18</sub>H<sub>17</sub>N<sub>3</sub>O (M+H)<sup>+</sup>, 292.1444; found, 292.1447.

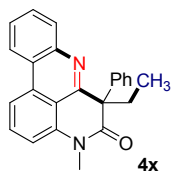

**6-ethyl-4-methyl-6-phenyl-4H-pyrido[4,3,2-gh]phenanthridin-5(6H)-one.** Purified by column chromatography (petroleum ether : ethyl acetate = 7 : 1). Yellow solid, mp 147–148 °C. <sup>1</sup>H NMR (600 MHz, CDCl<sub>3</sub>) δ 8.55 (d, *J* = 8.2 Hz, 1H), 8.31 (d, *J* = 8.3 Hz, 1H), 8.14 (d, *J* = 8.2 Hz, 1H), 7.83 (t, *J* = 8.1 Hz, 1H), 7.74 (t, *J* = 7.6 Hz, 1H), 7.66 (t, *J* = 7.6 Hz, 1H), 7.23 (d, *J* = 7.9 Hz, 1H), 7.21–7.09 (m, 4H), 3.63 (s, 3H), 3.16–3.05 (m, 1H), 3.02–2.92 (m, 1H), 0.87 (t, *J* = 7.2 Hz, 3H). <sup>13</sup>C NMR (151 MHz, CDCl<sub>3</sub>) δ 172.2, 158.2, 145.0, 144.7, 138.7, 133.1, 131.8, 130.2, 129.1, 128.3, 126.88, 126.81, 122.6, 122.5, 116.2, 113.4, 110.9, 60.6, 32.3, 30.0, 10.5. IR (film) ν 2961, 2924, 1667, 1588, 1569, 1463, 1344, 764, 753, 700 cm<sup>-1</sup>. HRMS (ESI): calc. for C<sub>24</sub>H<sub>20</sub>N<sub>2</sub>O (M+H)<sup>+</sup>, 353.1648; found, 353.1653.

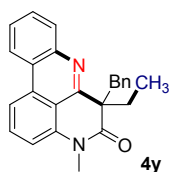

**6-benzyl-6-ethyl-4-methyl-4H-pyrido[4,3,2-gh]phenanthridin-5(6H)-one.** Purified by column chromatography (petroleum ether : ethyl acetate = 9 : 1). Yellow solid, mp 132–133 °C. <sup>1</sup>H NMR (600 MHz, CDCl<sub>3</sub>) δ 8.51 (d, *J* = 8.1 Hz, 1H), 8.24 (d, *J* = 8.0 Hz, 1H), 8.15 (d, *J* = 8.3 Hz, 1H), 7.80 (t, *J* = 7.5 Hz, 1H), 7.67 (t, *J* = 7.6 Hz, 1H), 7.62 (t, *J* = 8.1 Hz, 1H), 6.87 (d, *J* = 7.8 Hz, 1H), 6.83 (t, *J* = 7.3 Hz, 1H), 6.76 (t, *J* = 7.5 Hz, 2H), 6.58 (d, *J* = 7.5 Hz, 2H), 3.60 (d, *J* = 12.2 Hz, 1H), 3.52 (d, *J* = 12.5 Hz, 1H), 3.39 (s, 3H), 2.77–2.71 (m, 1H), 2.60–2.53 (m, 1H), 0.68 (t, *J* = 7.4 Hz, 3H). <sup>13</sup>C NMR (151 MHz, CDCl<sub>3</sub>) δ 172.8, 158.6, 145.0, 138.4, 137.1, 132.3, 131.4, 129.8, 129.3, 129.0, 127.3, 126.5, 126.1, 122.6, 115.7, 114.1, 110.2, 58.9, 50.2, 35.1, 29.2, 9.9. IR (film) ν 3028, 2963, 2931, 1664, 1611, 1588, 1464, 1083, 755, 735, 701 cm<sup>-1</sup>. HRMS (ESI): calc. for C<sub>25</sub>H<sub>22</sub>N<sub>2</sub>O (M+H)<sup>+</sup>, 367.1805; found, 367.1827.

## 8. Charts of compounds

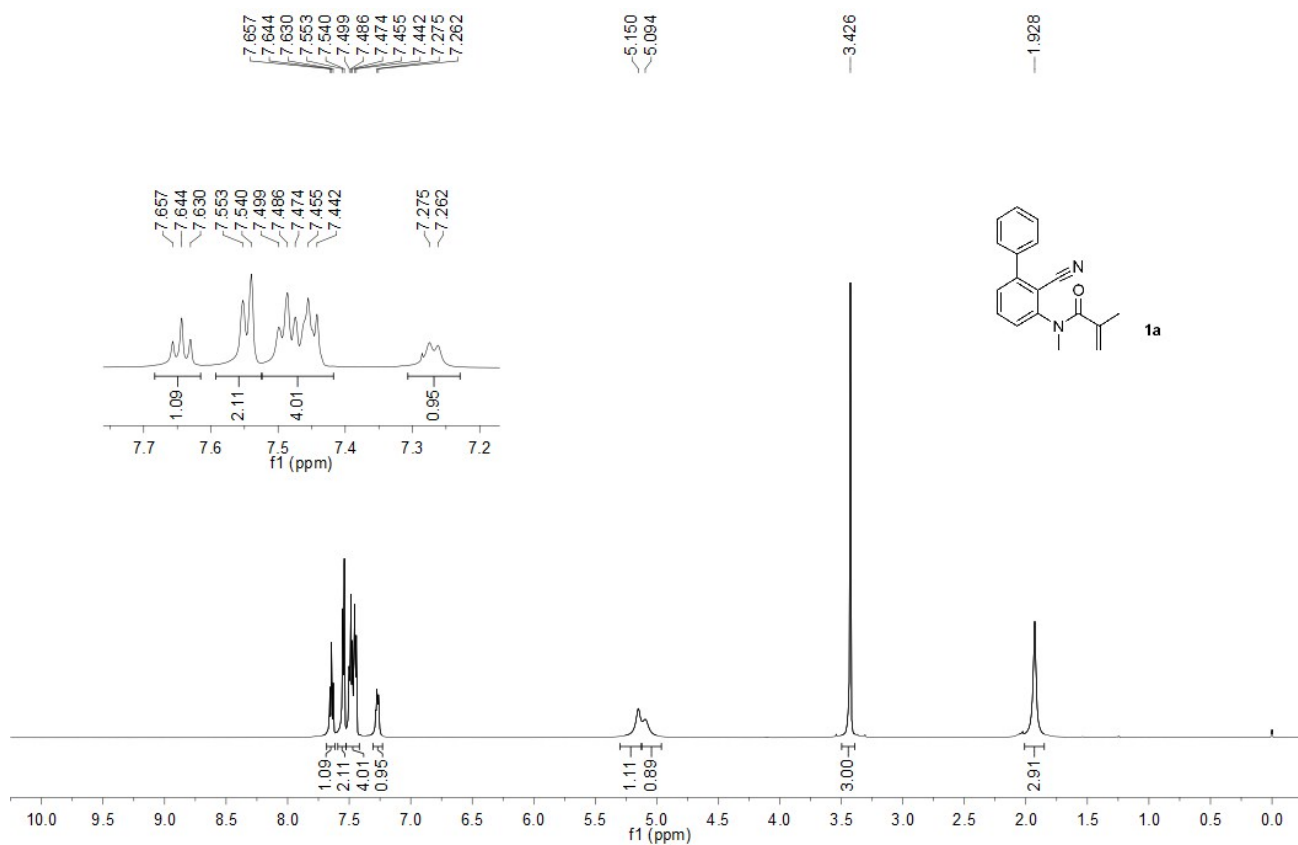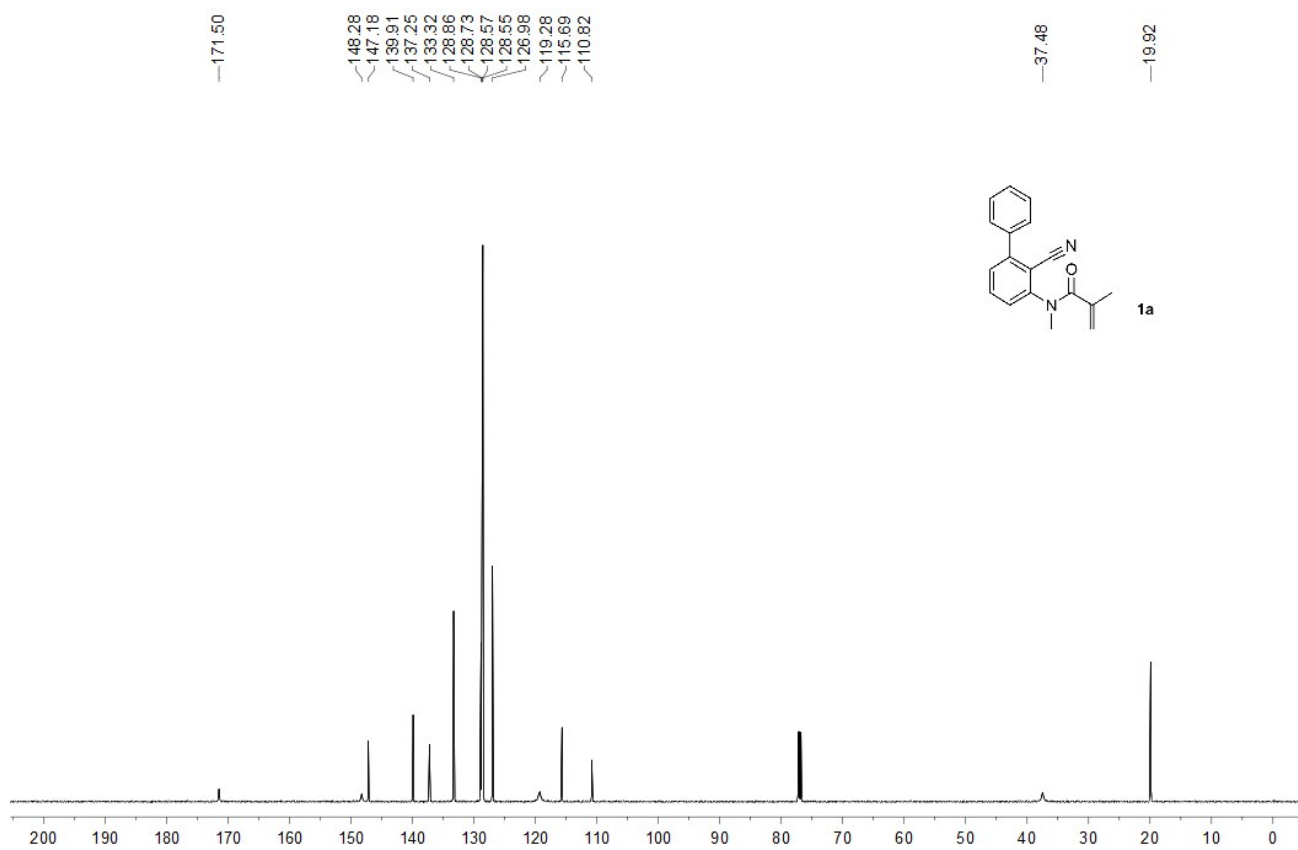

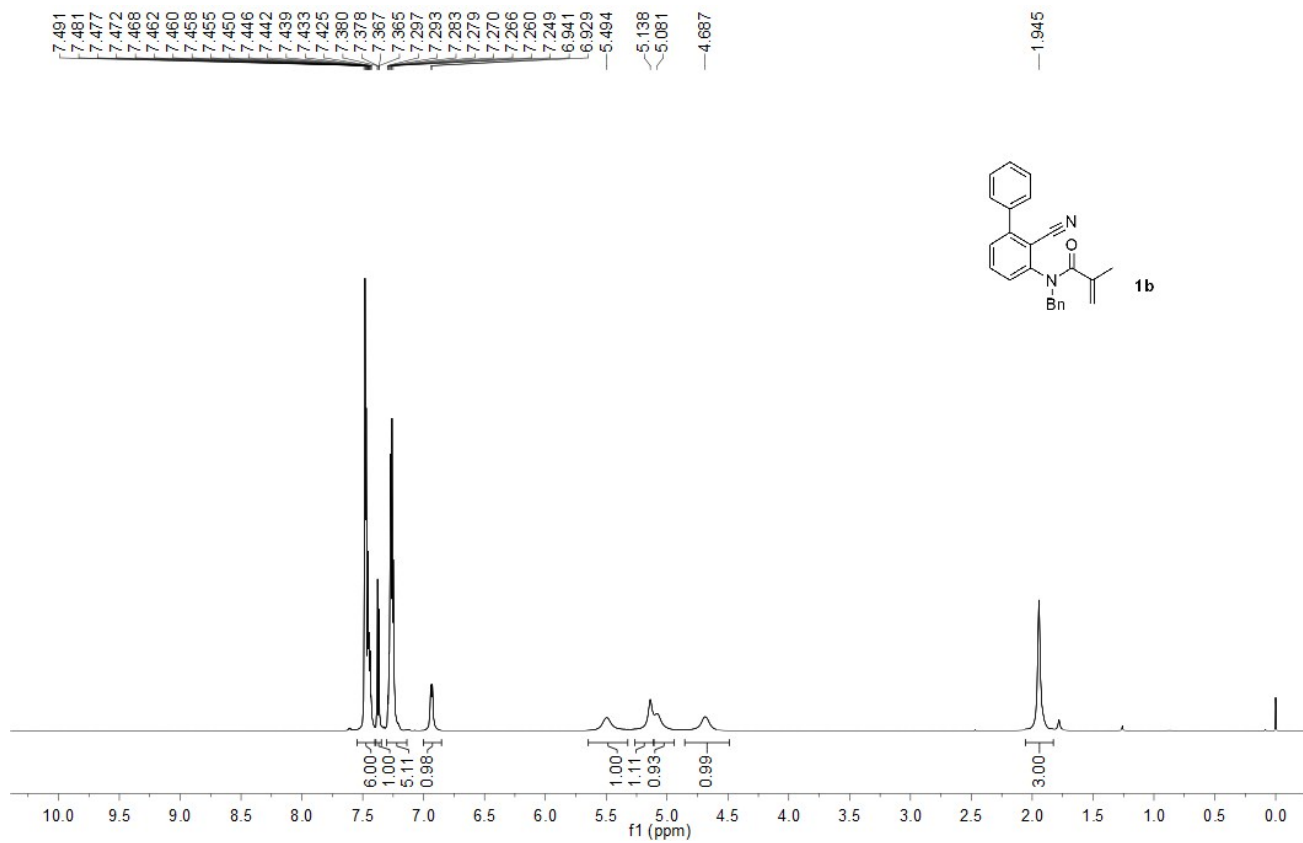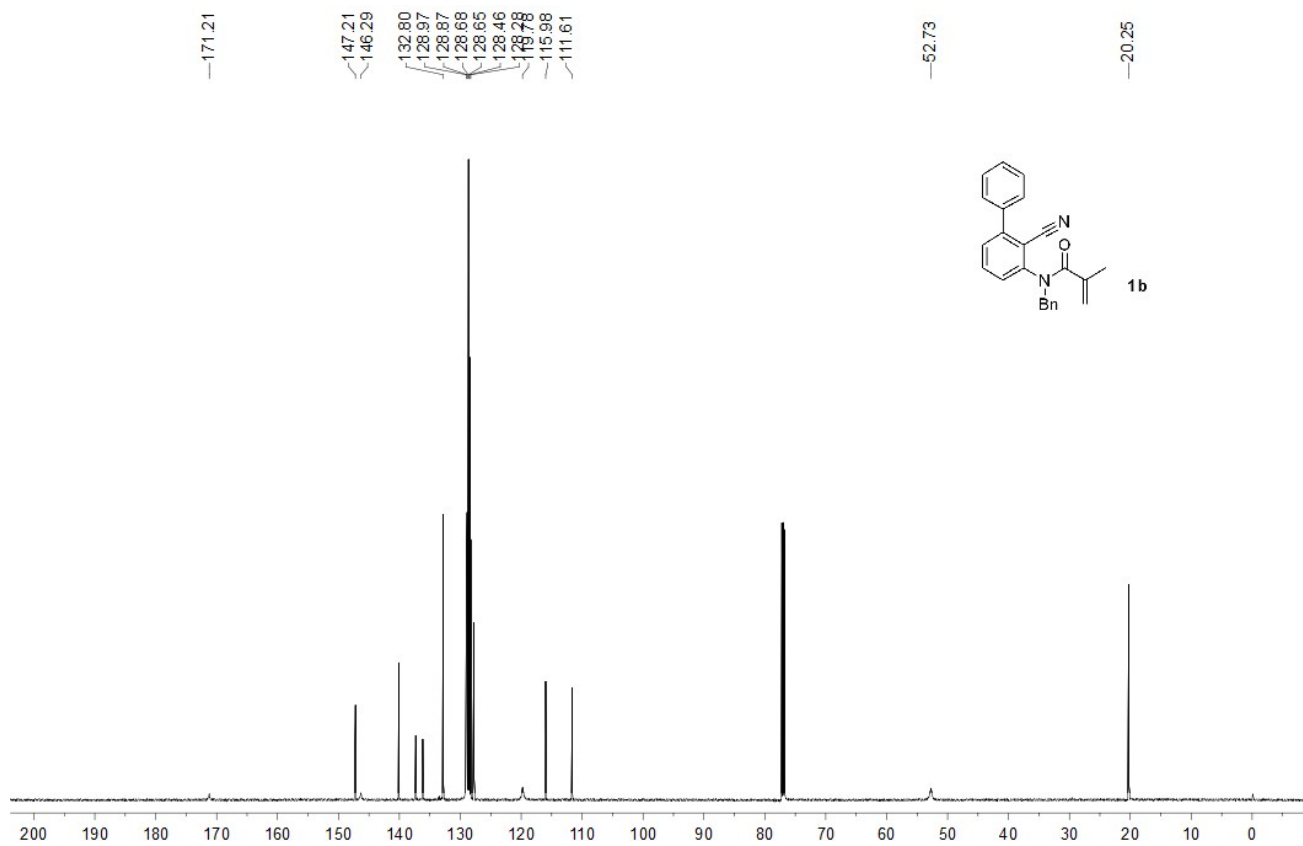

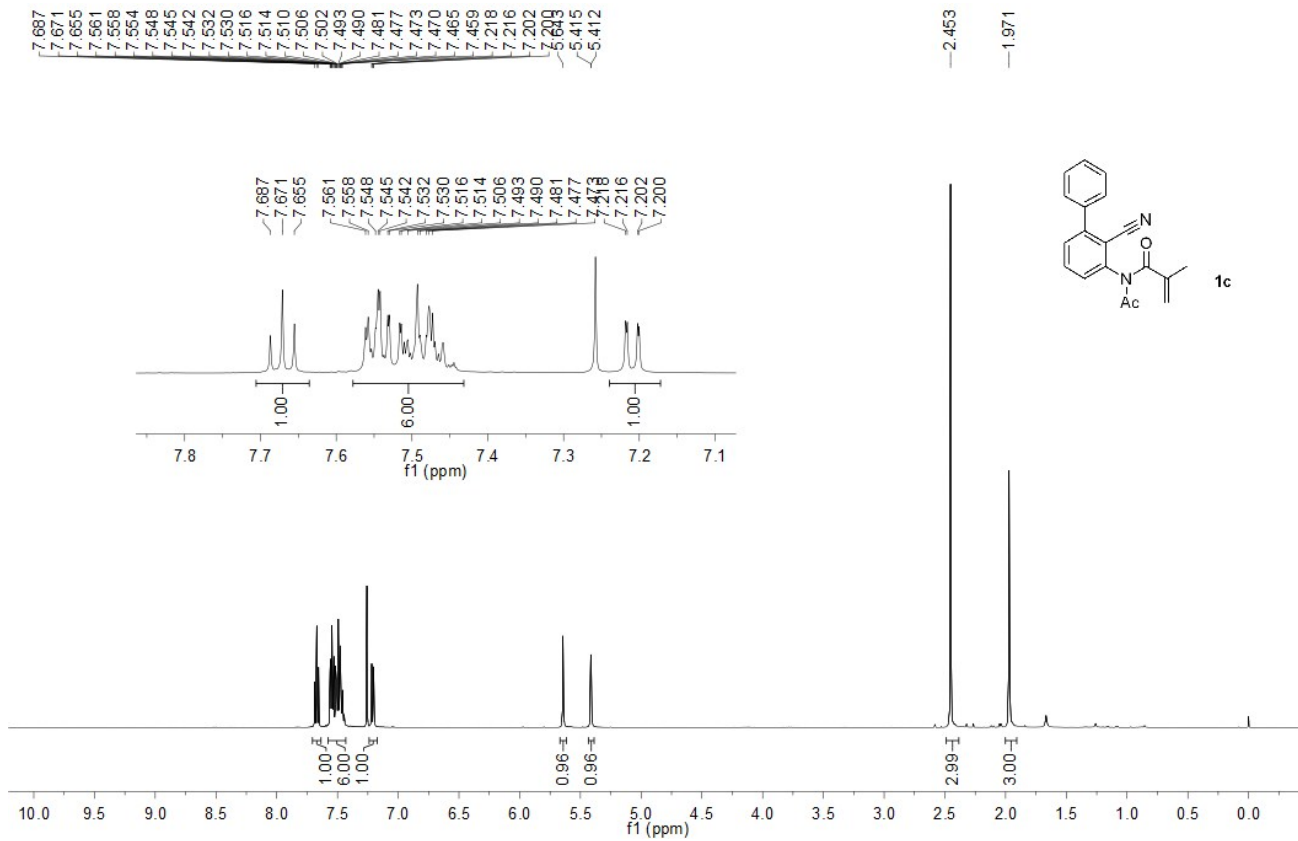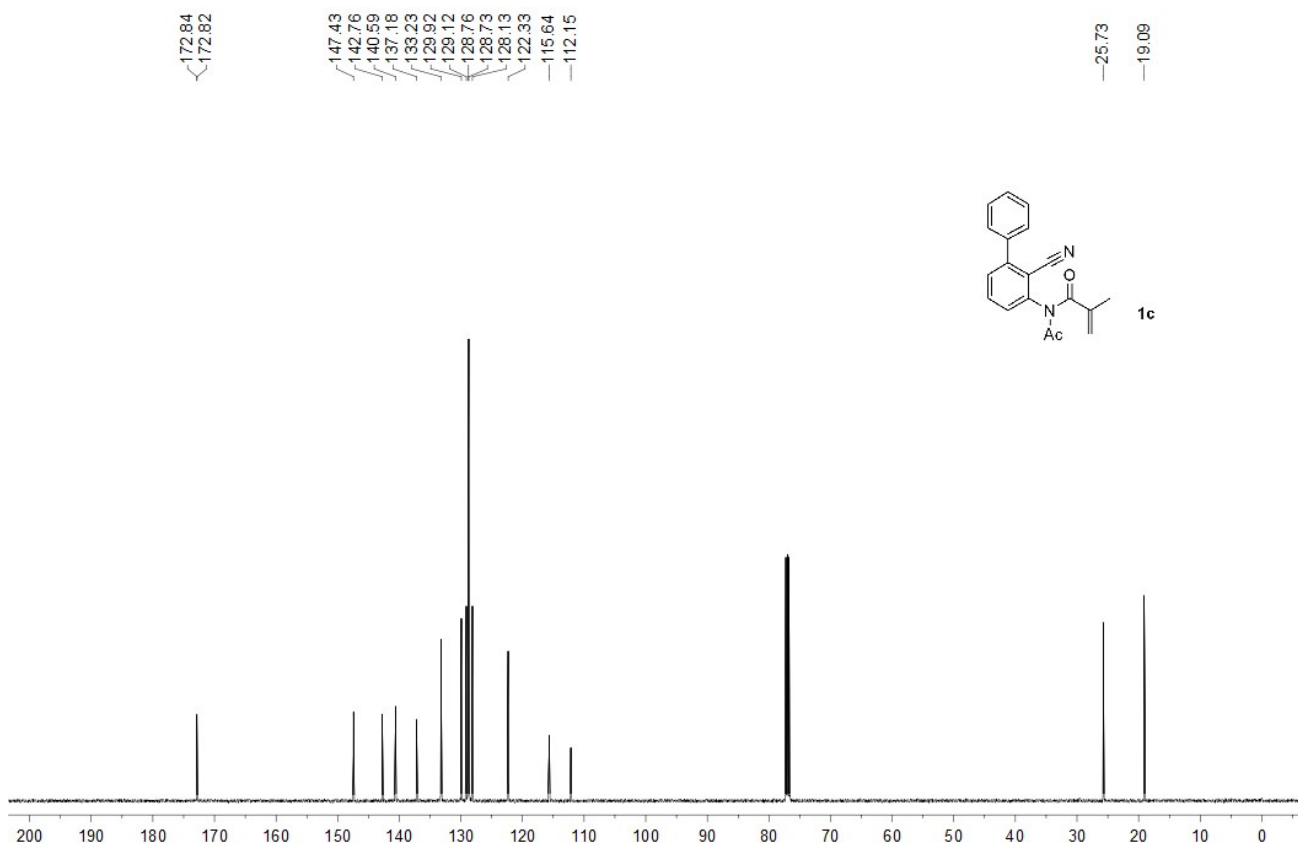

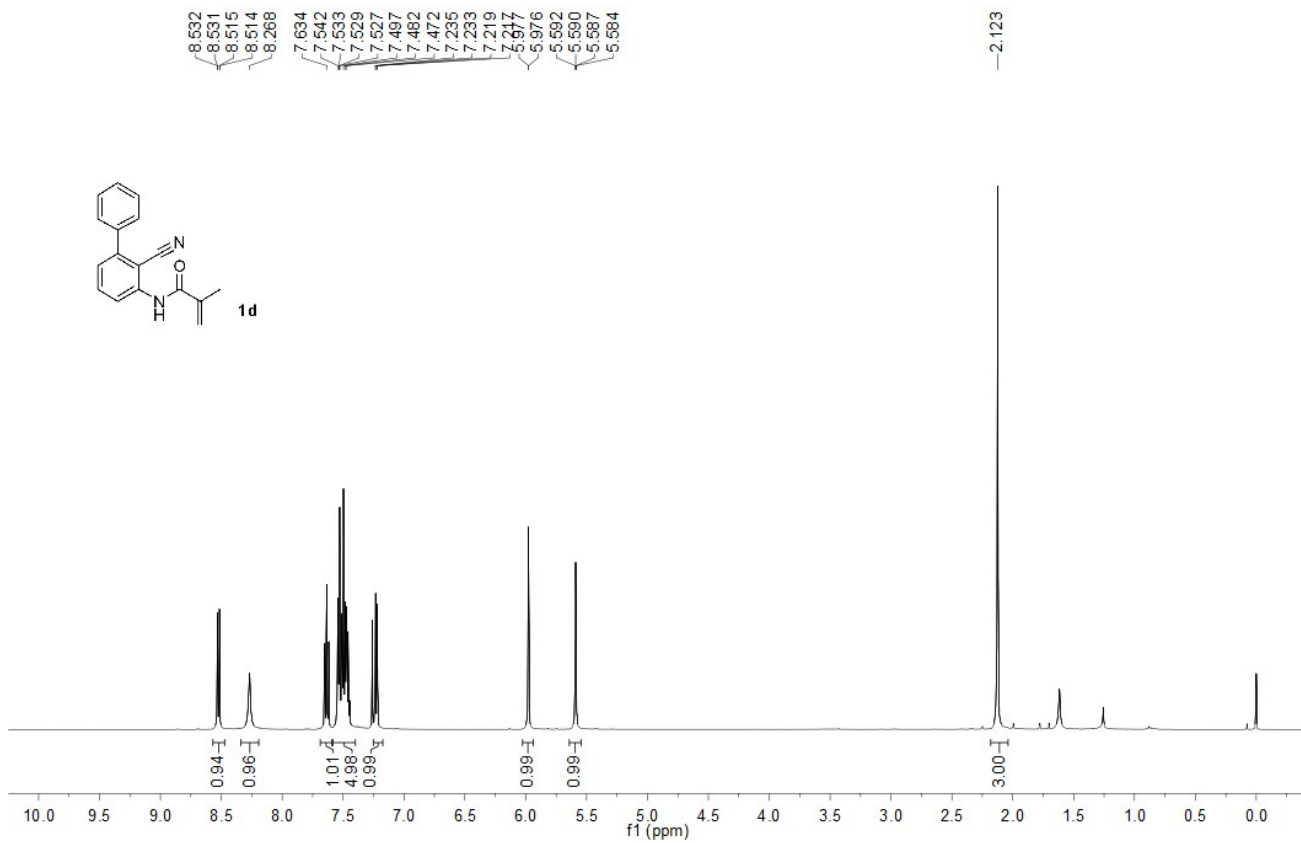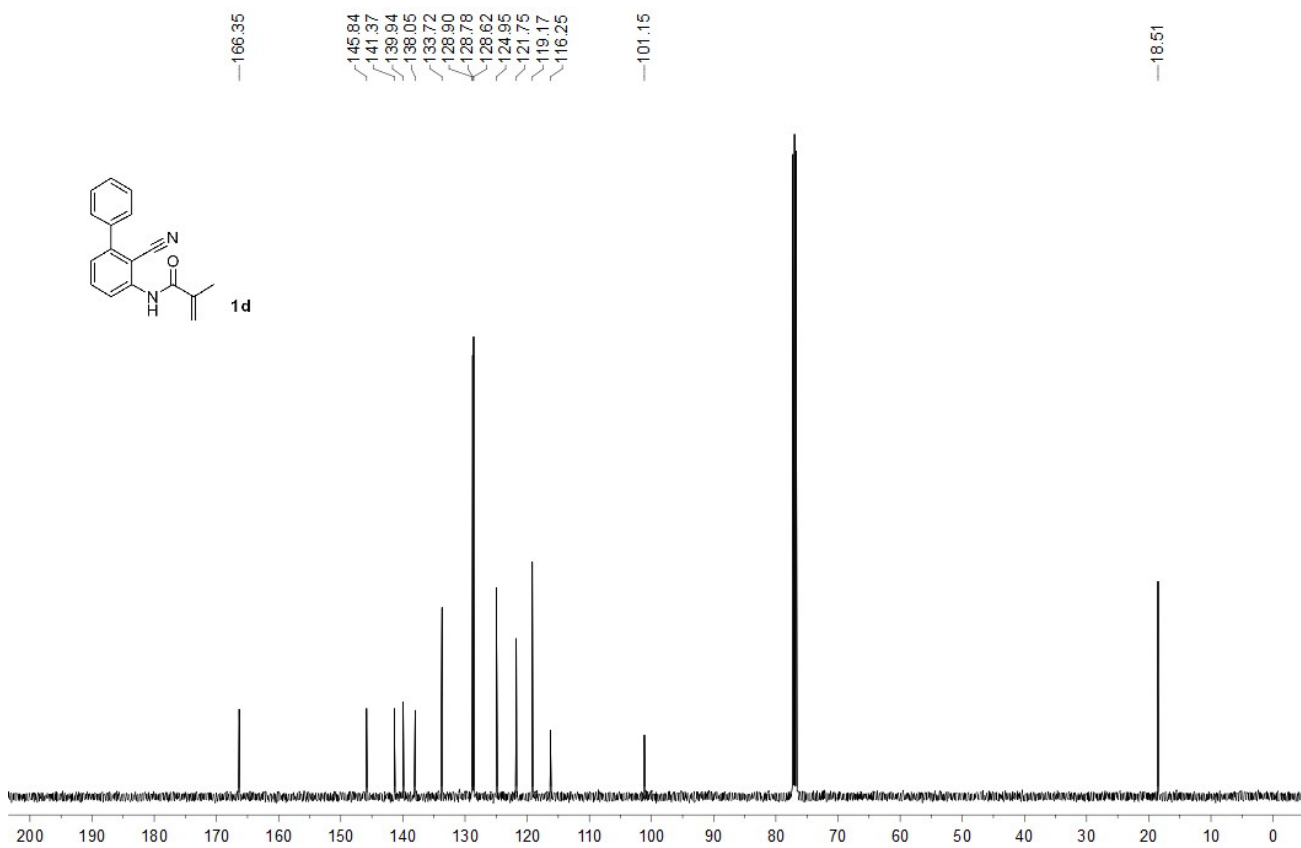

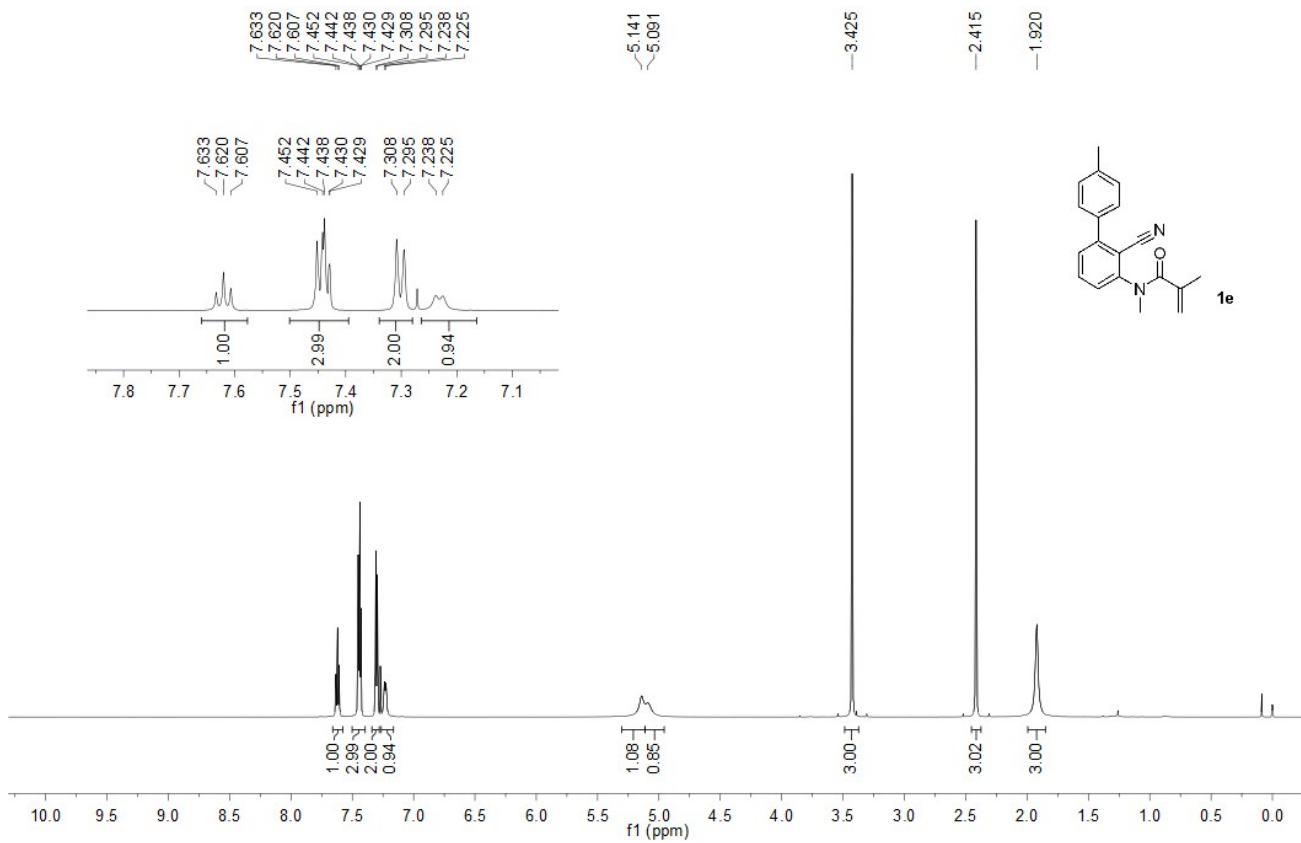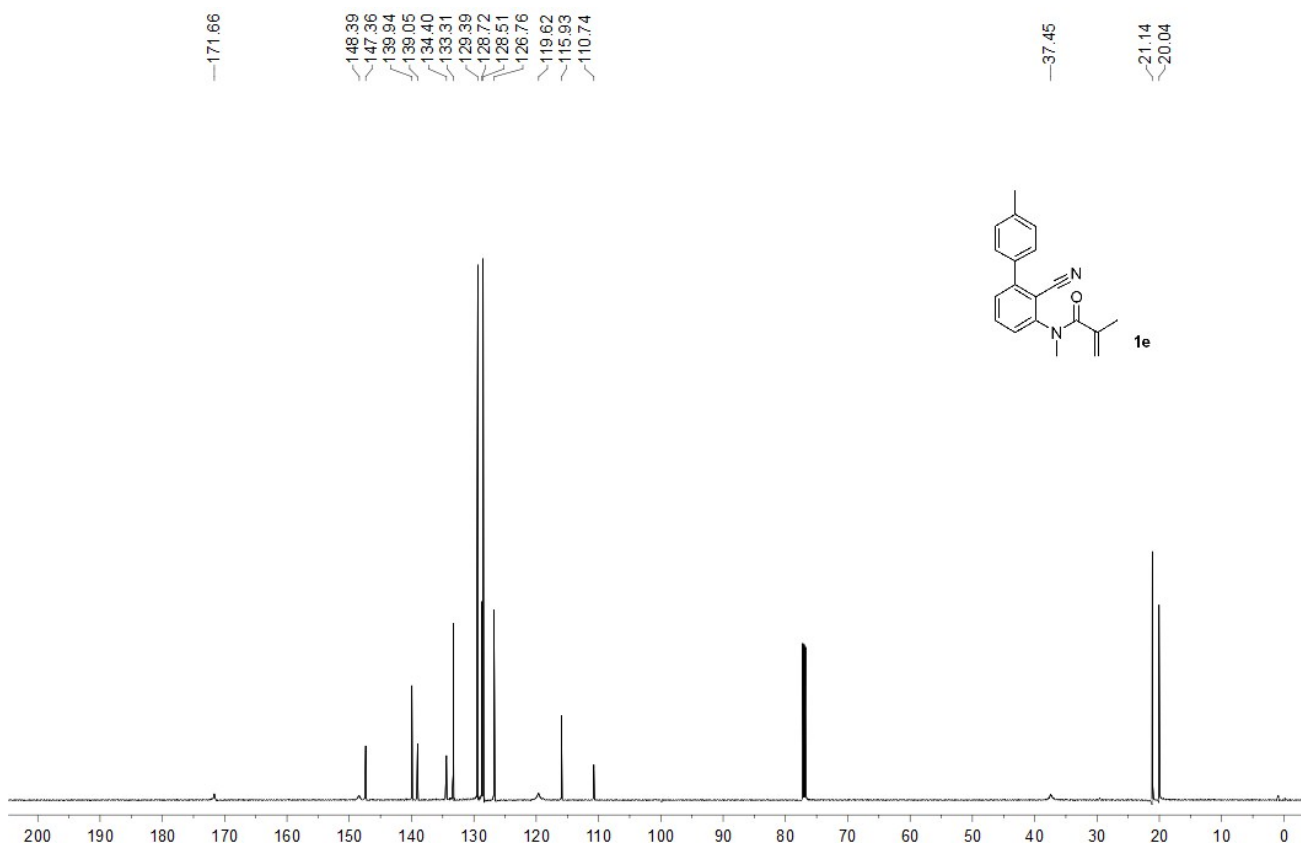

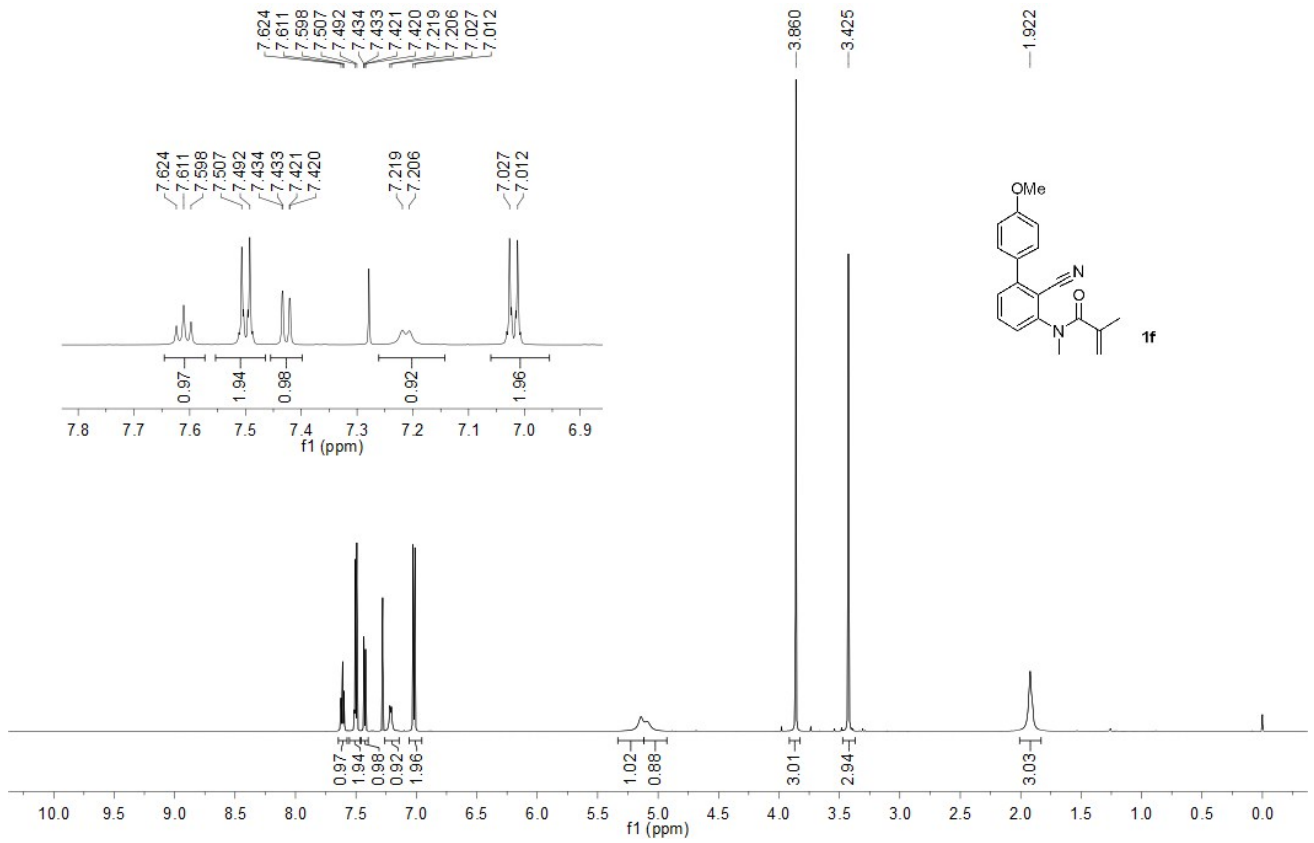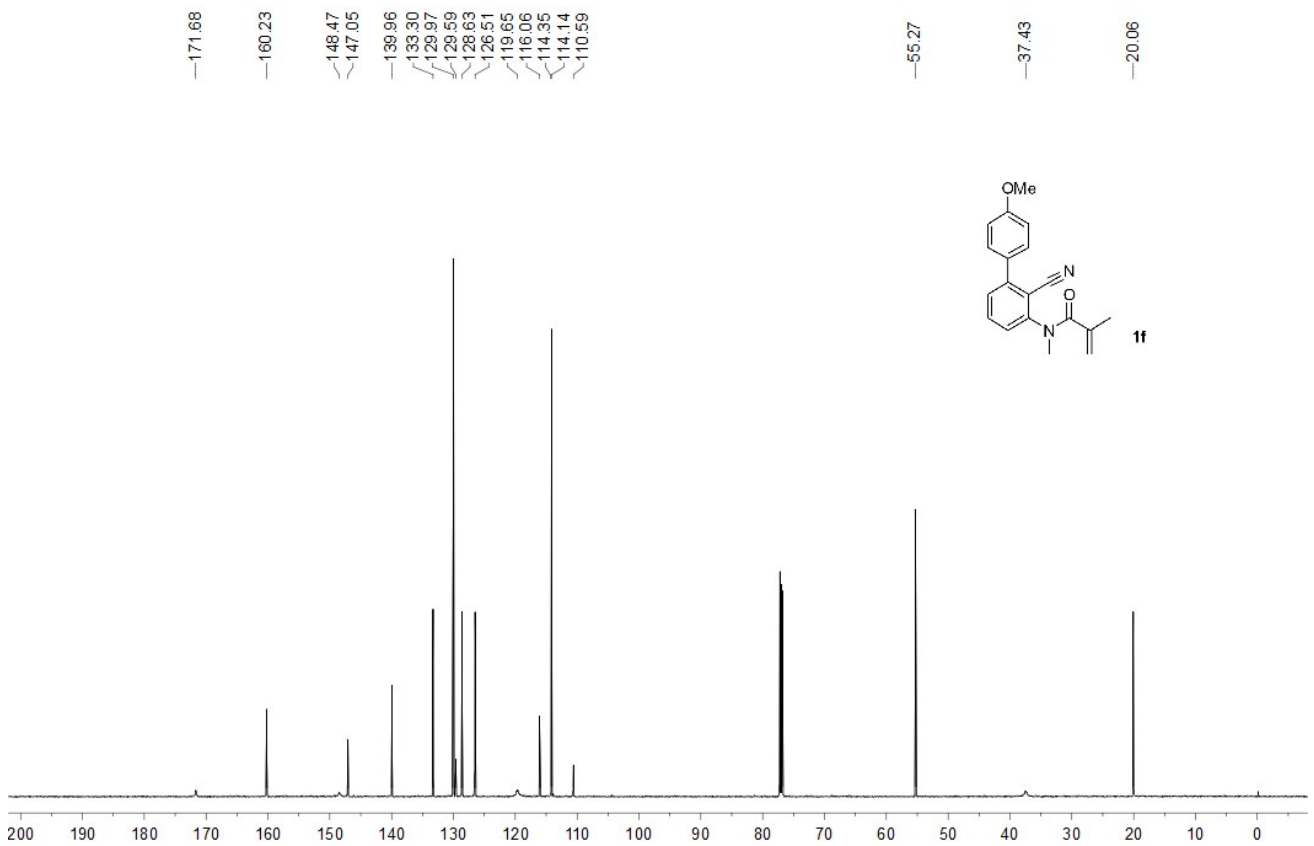

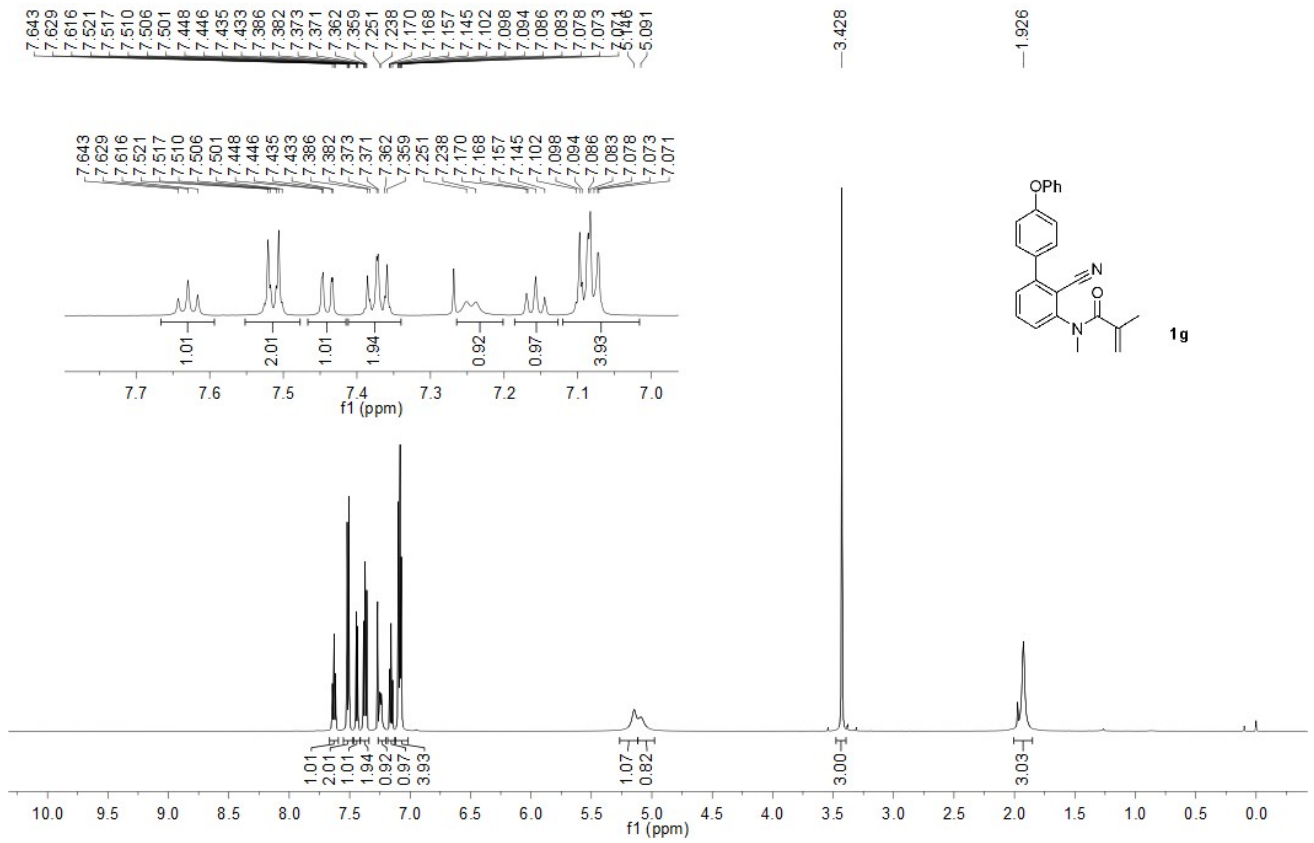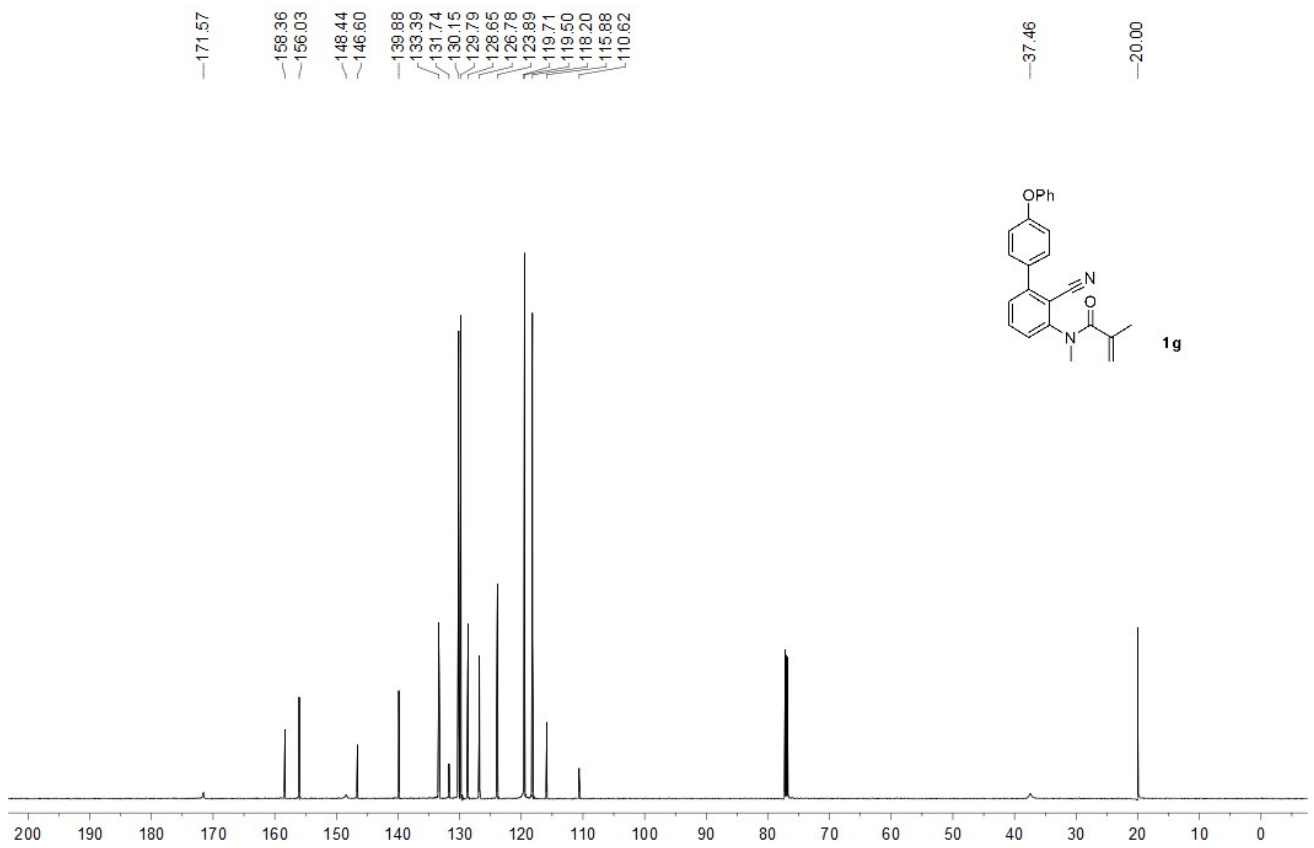



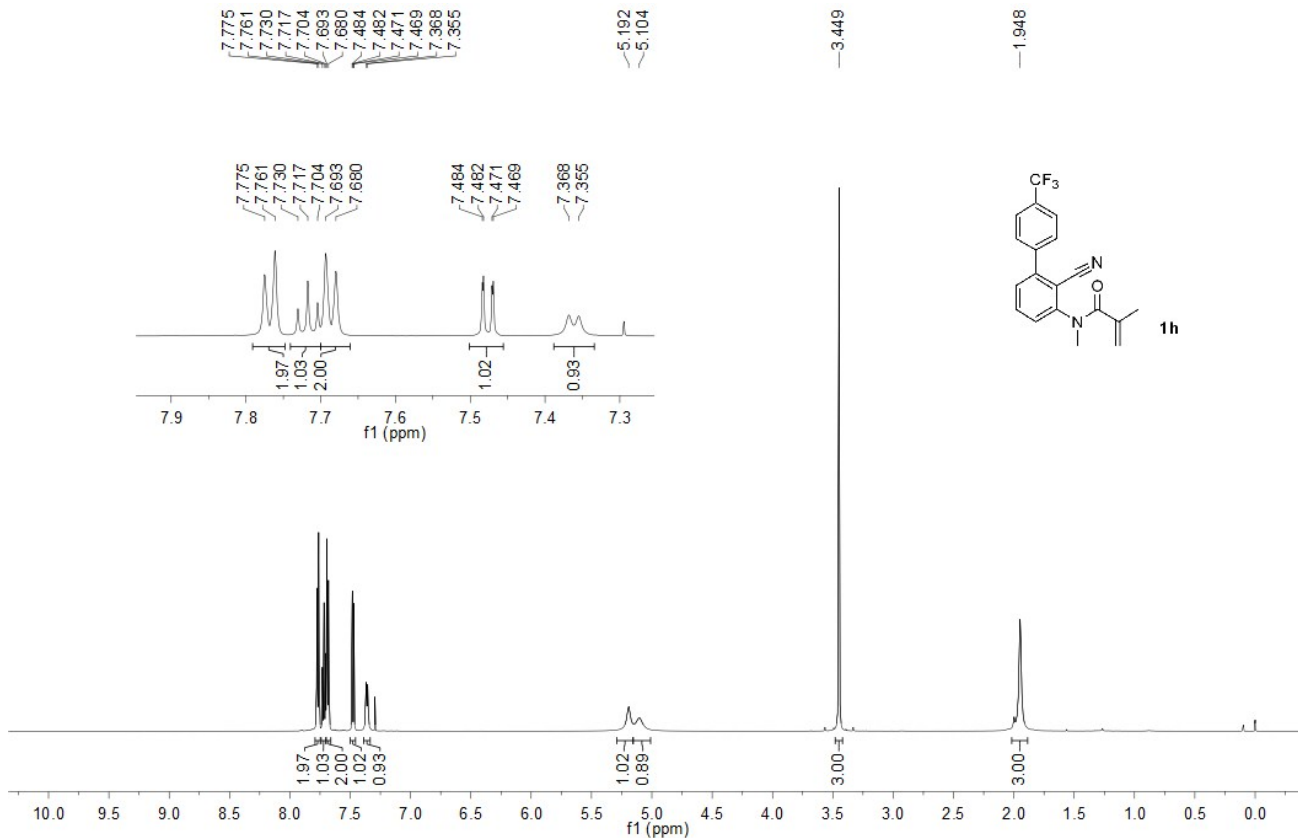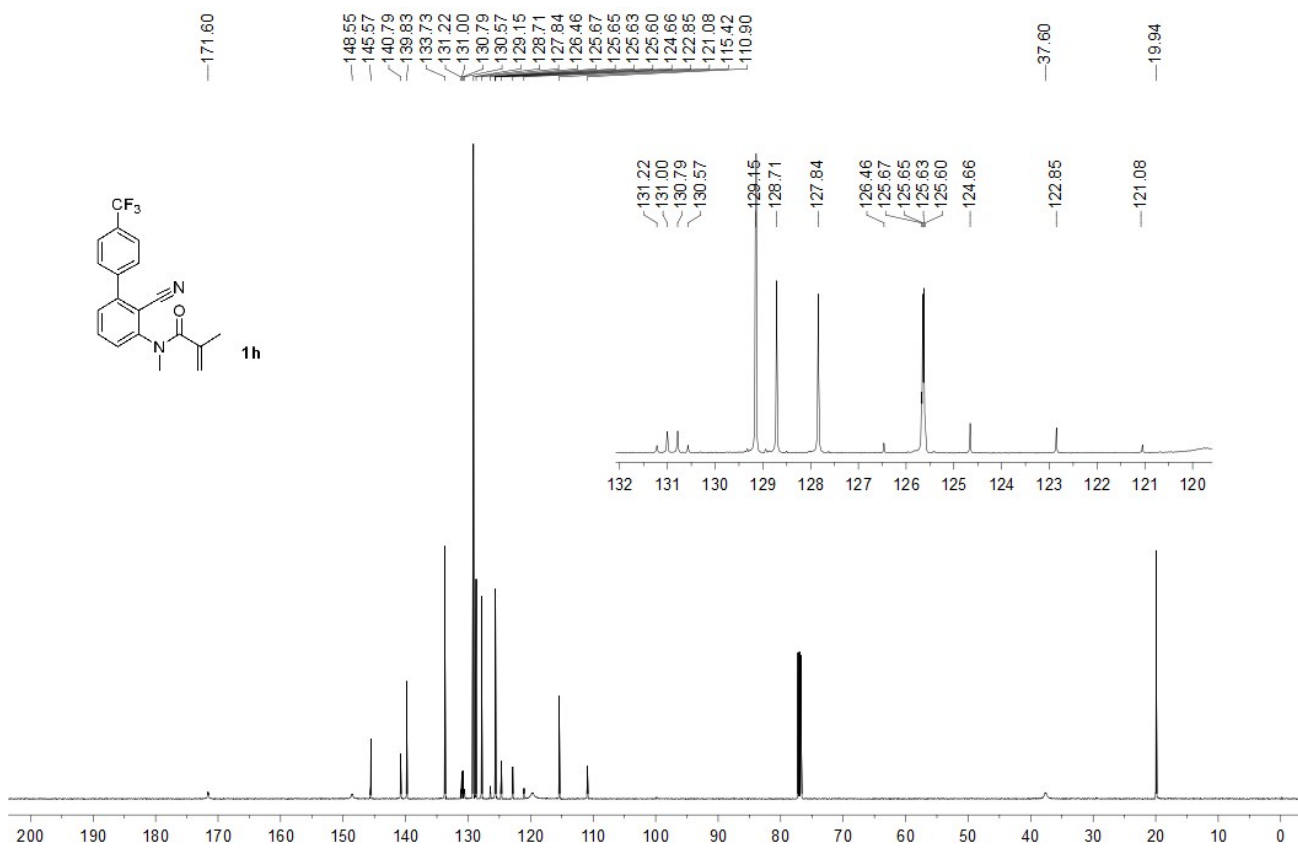

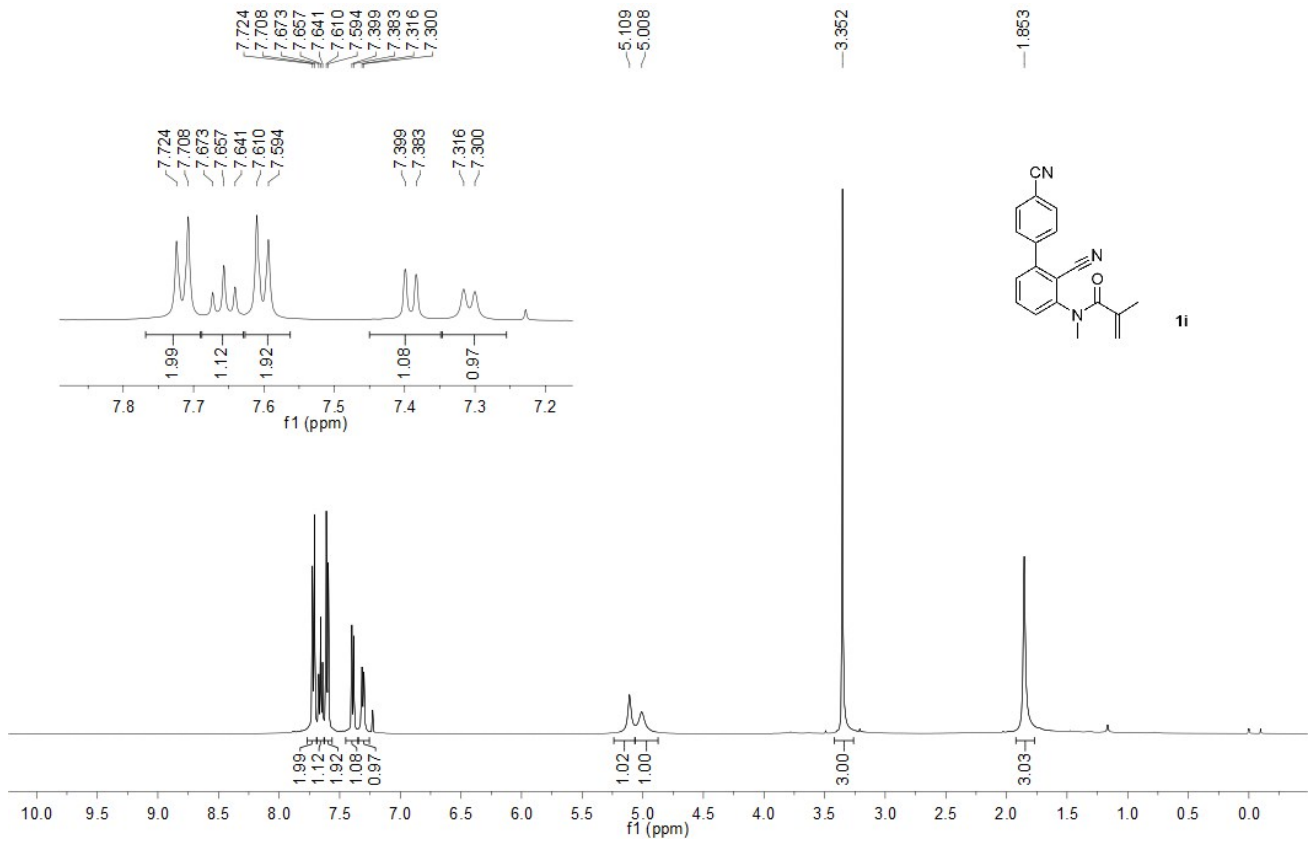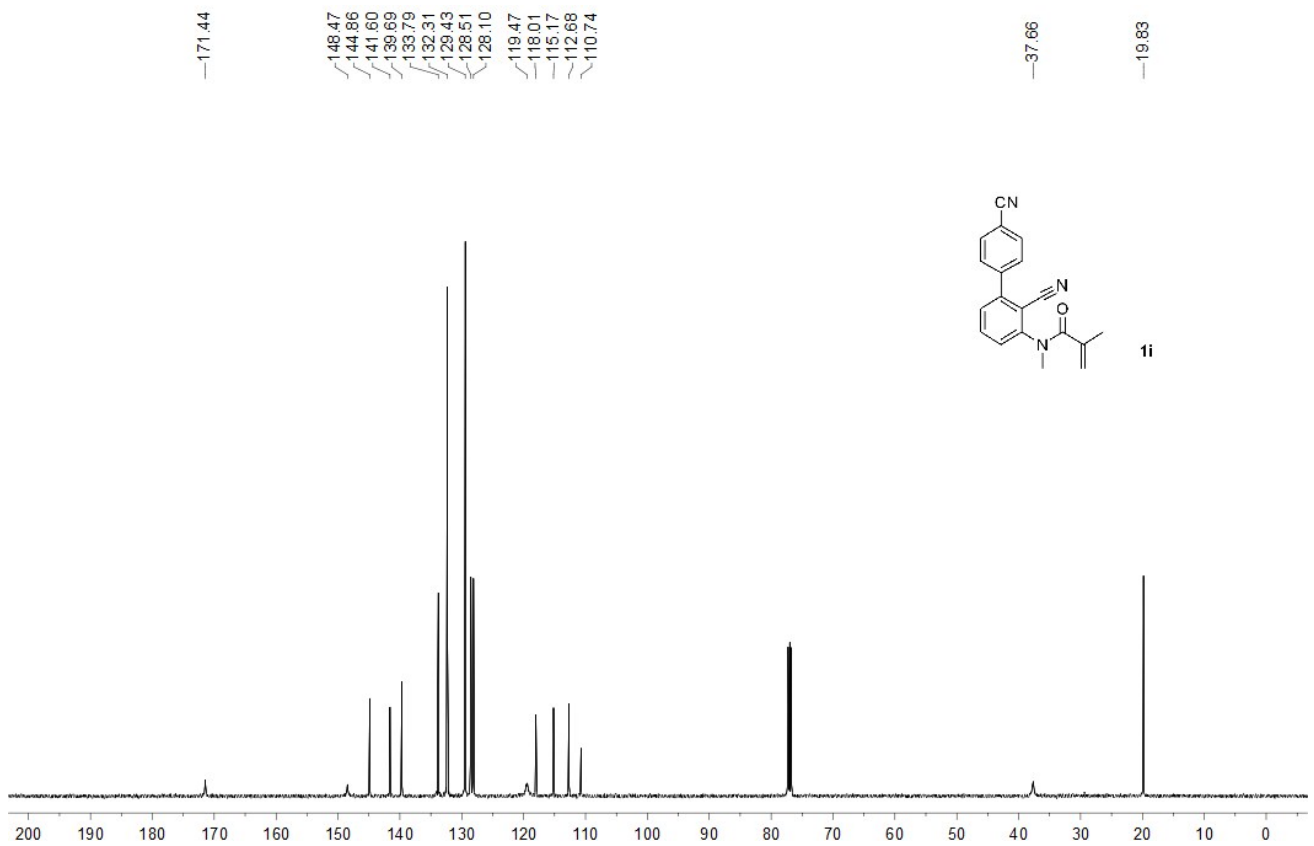

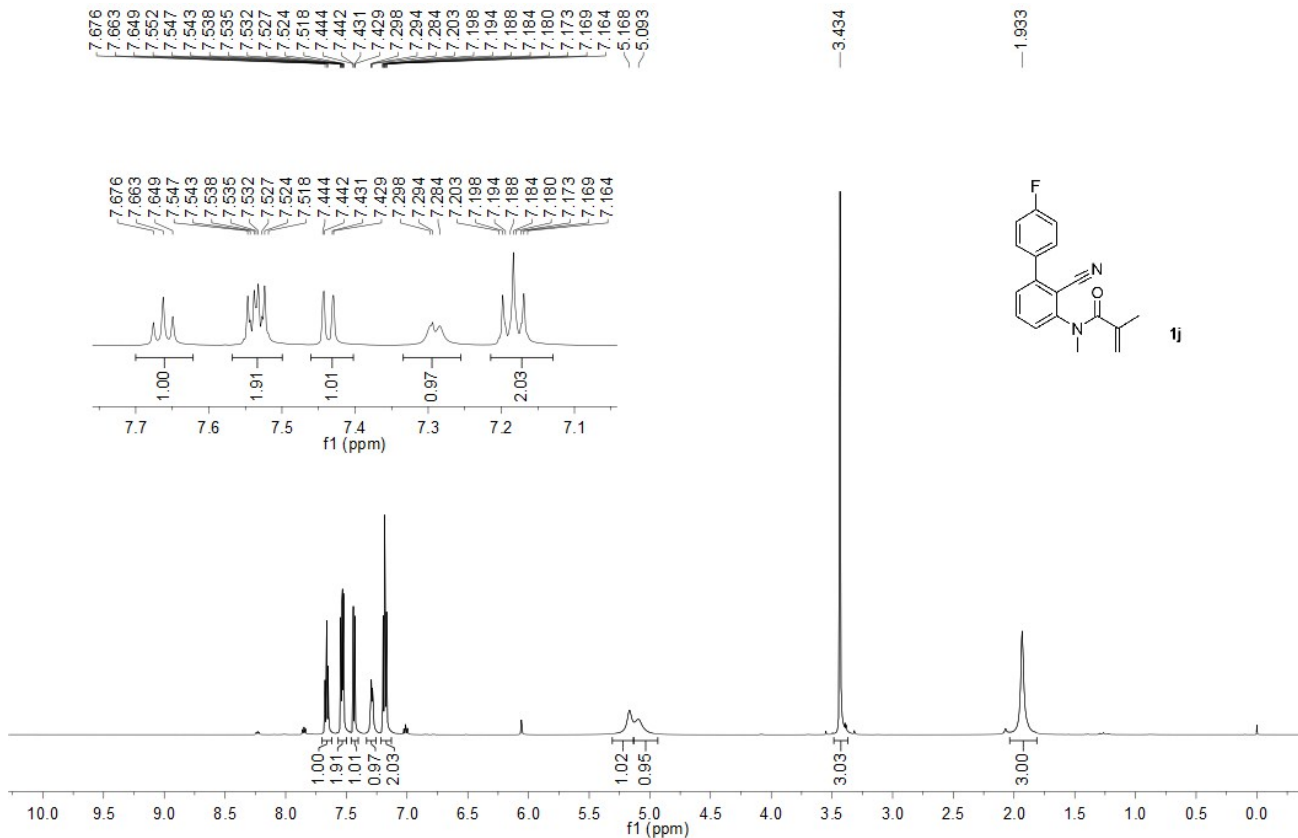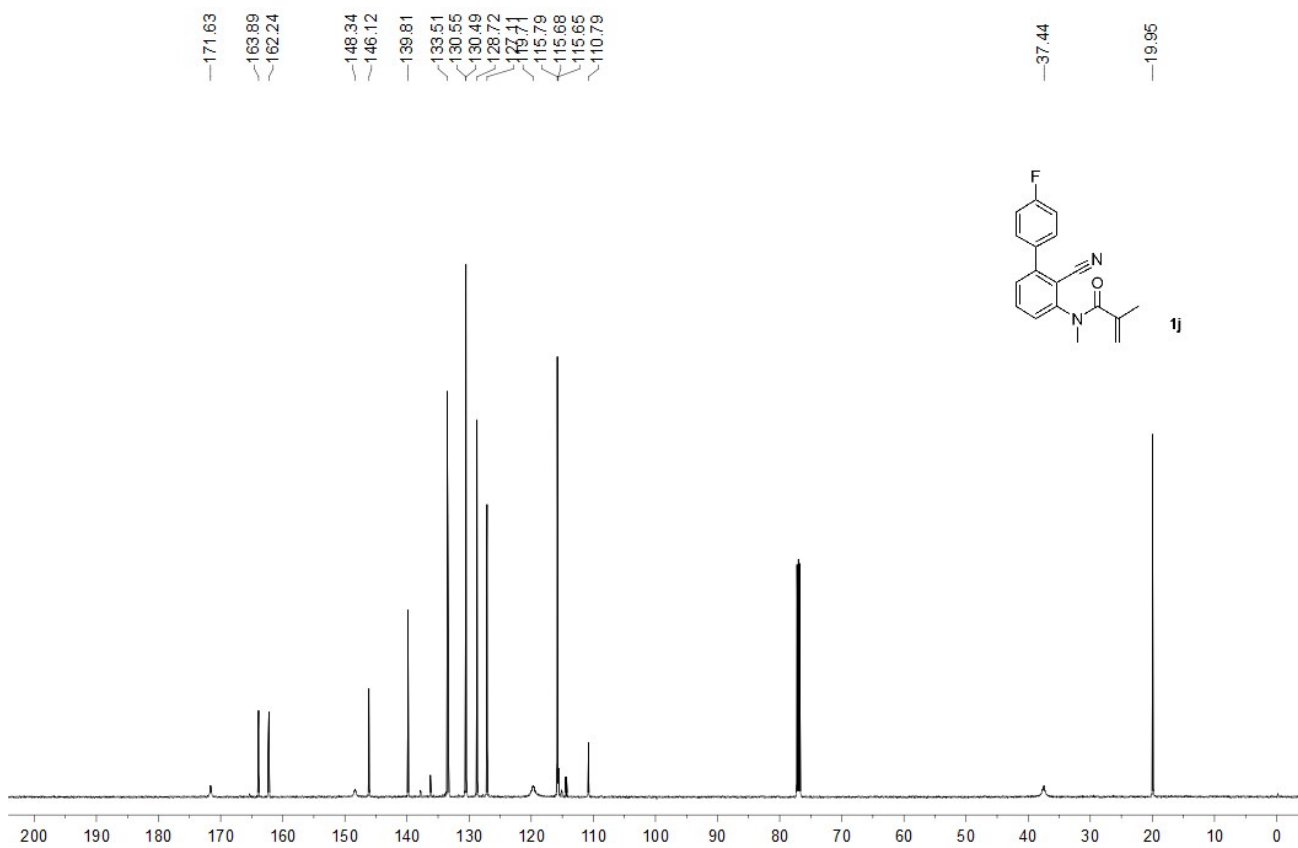

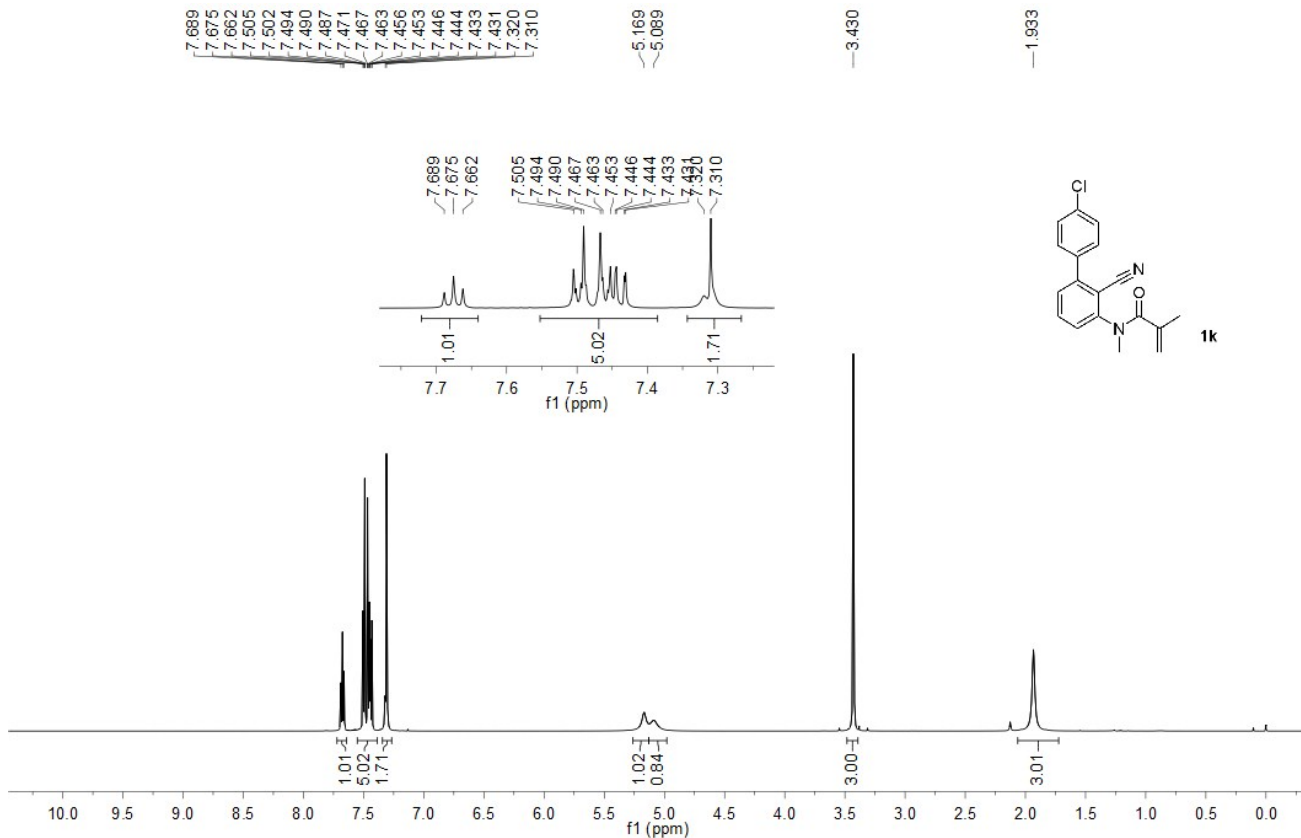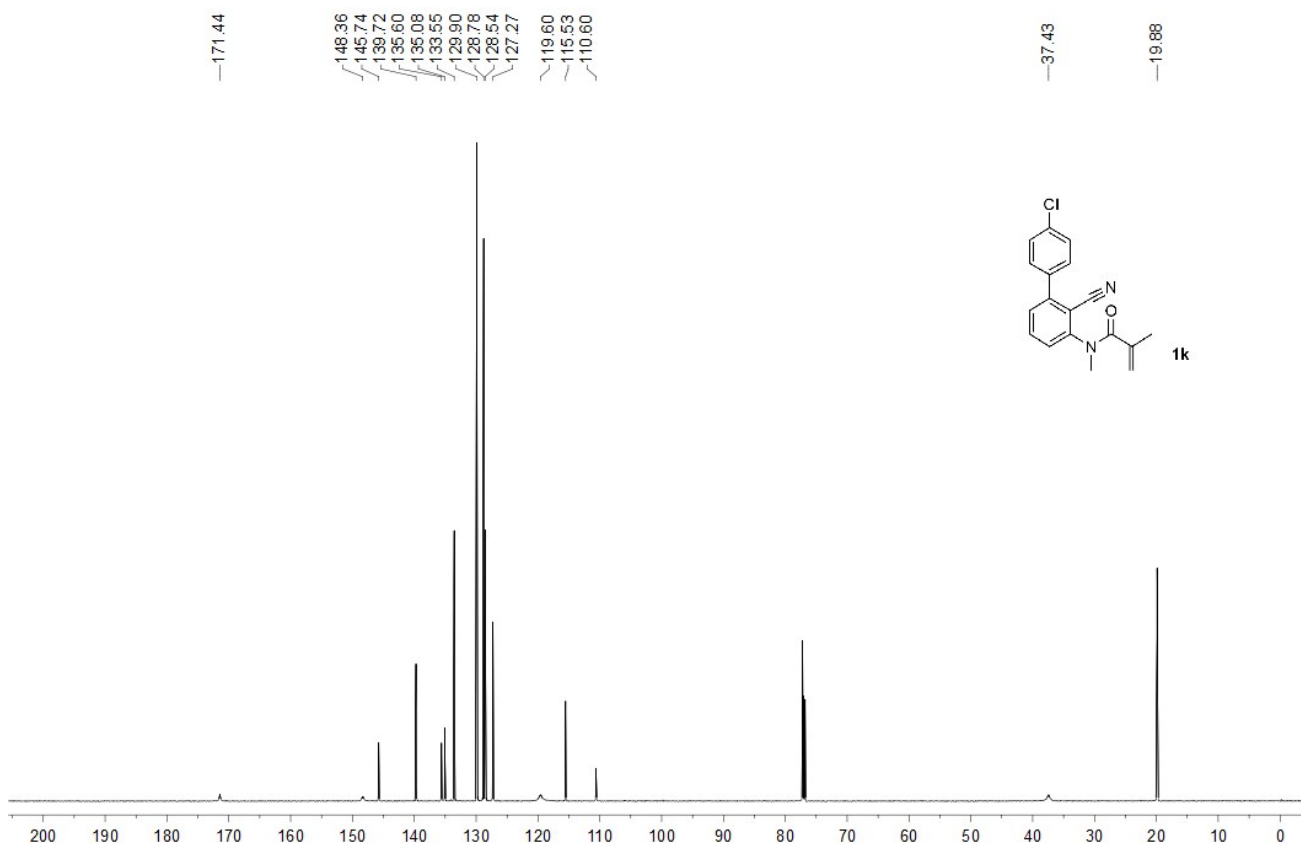

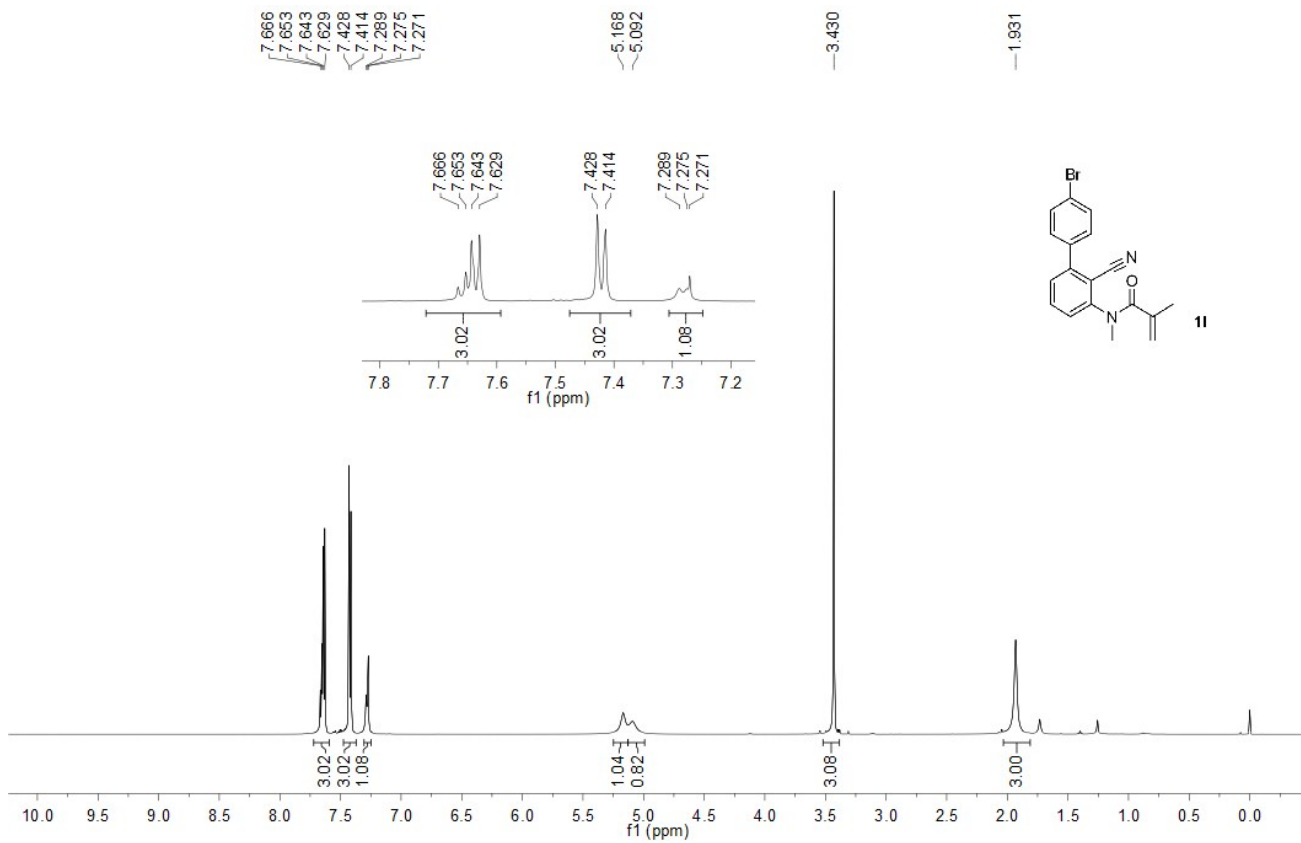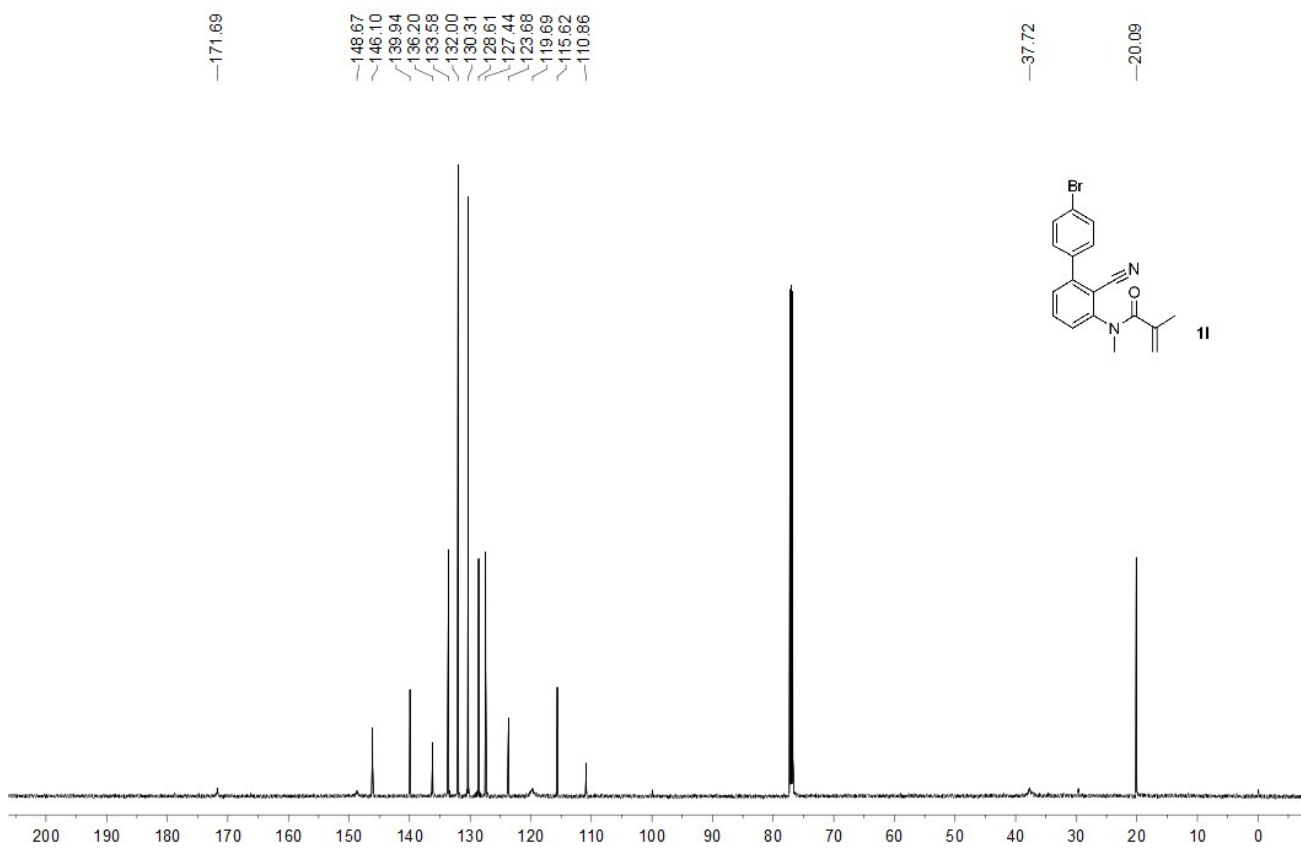

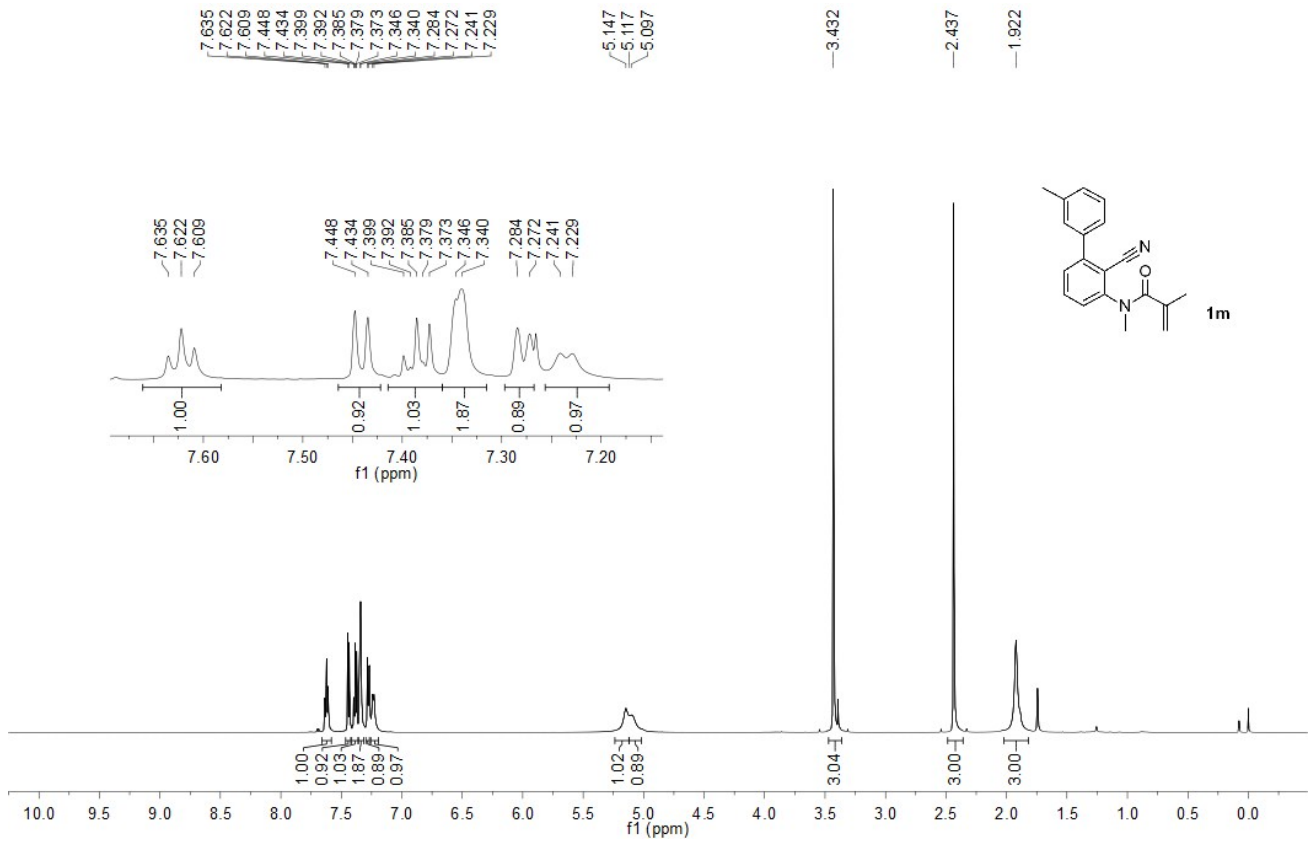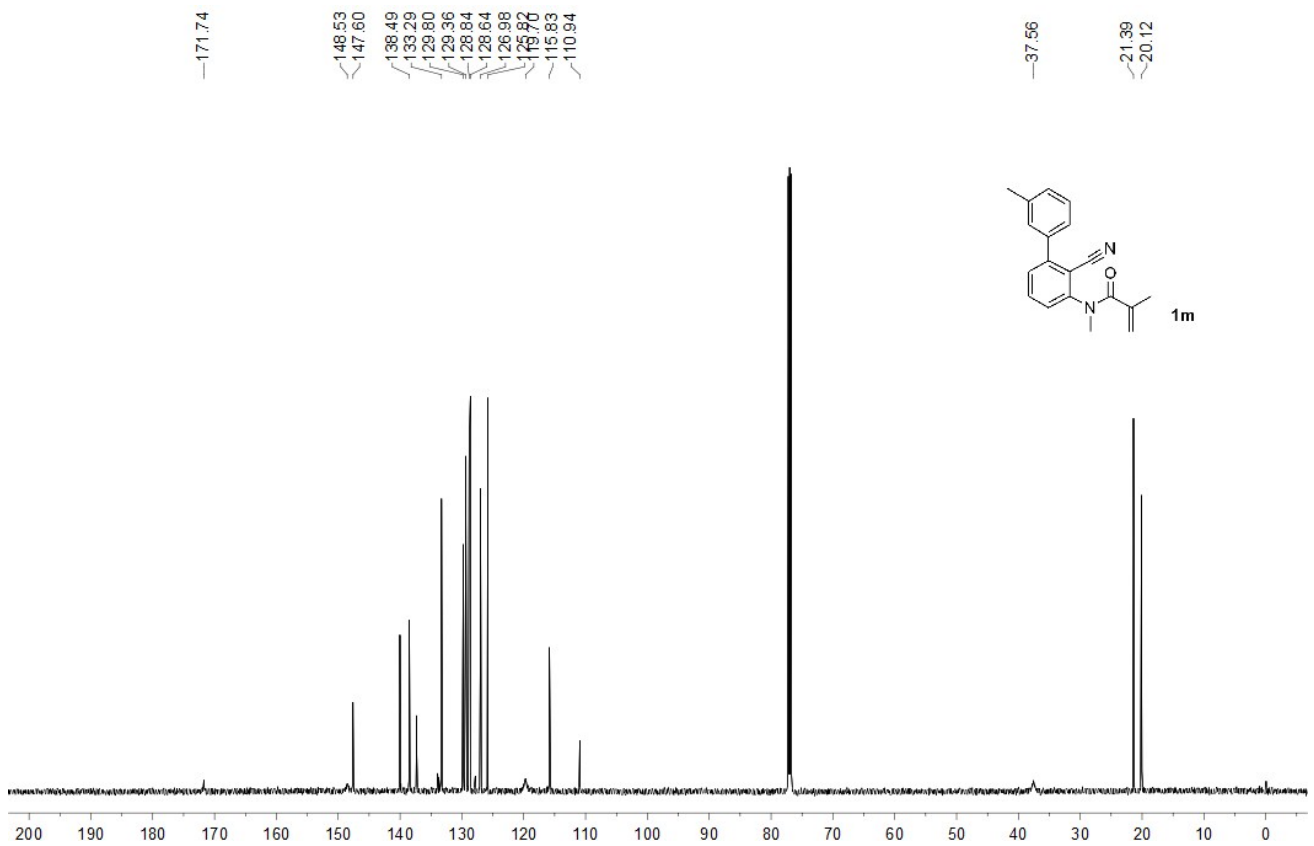

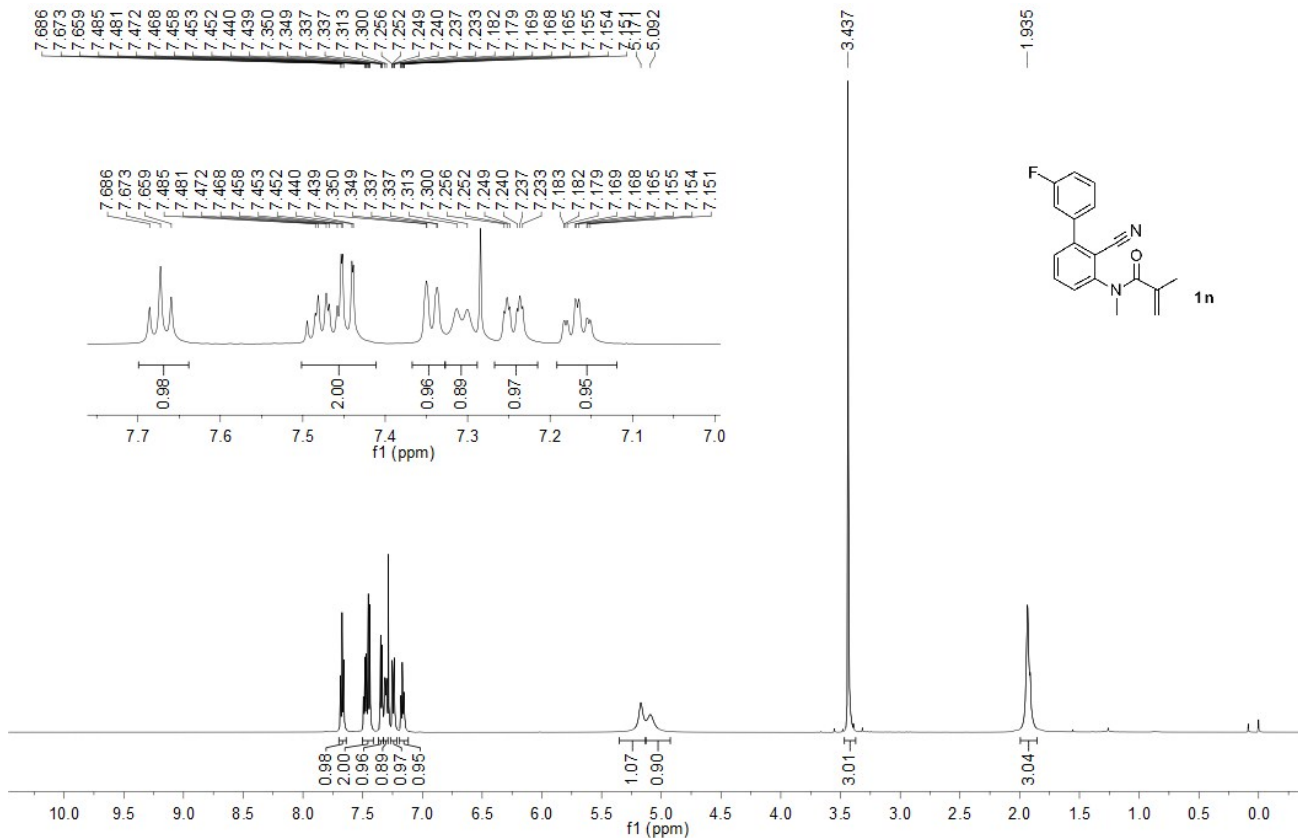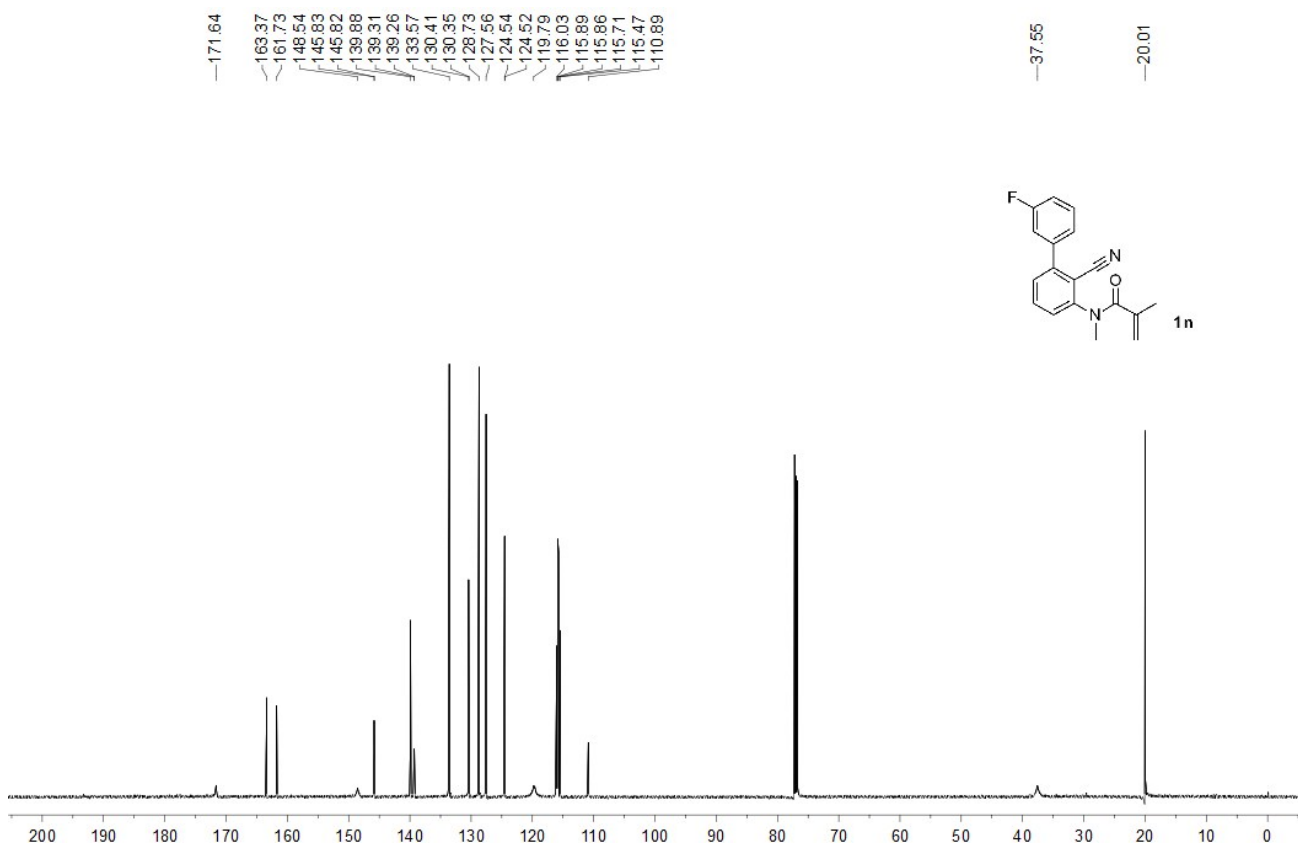

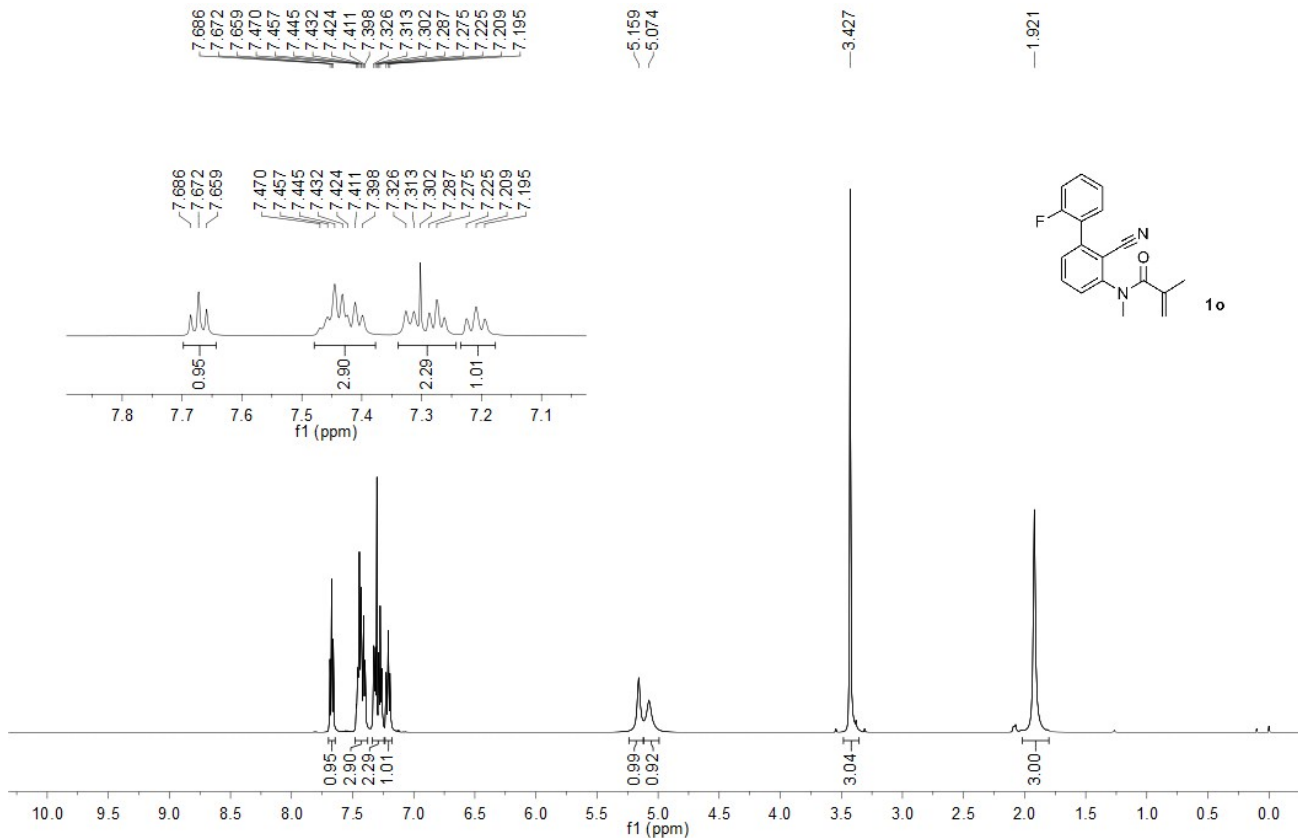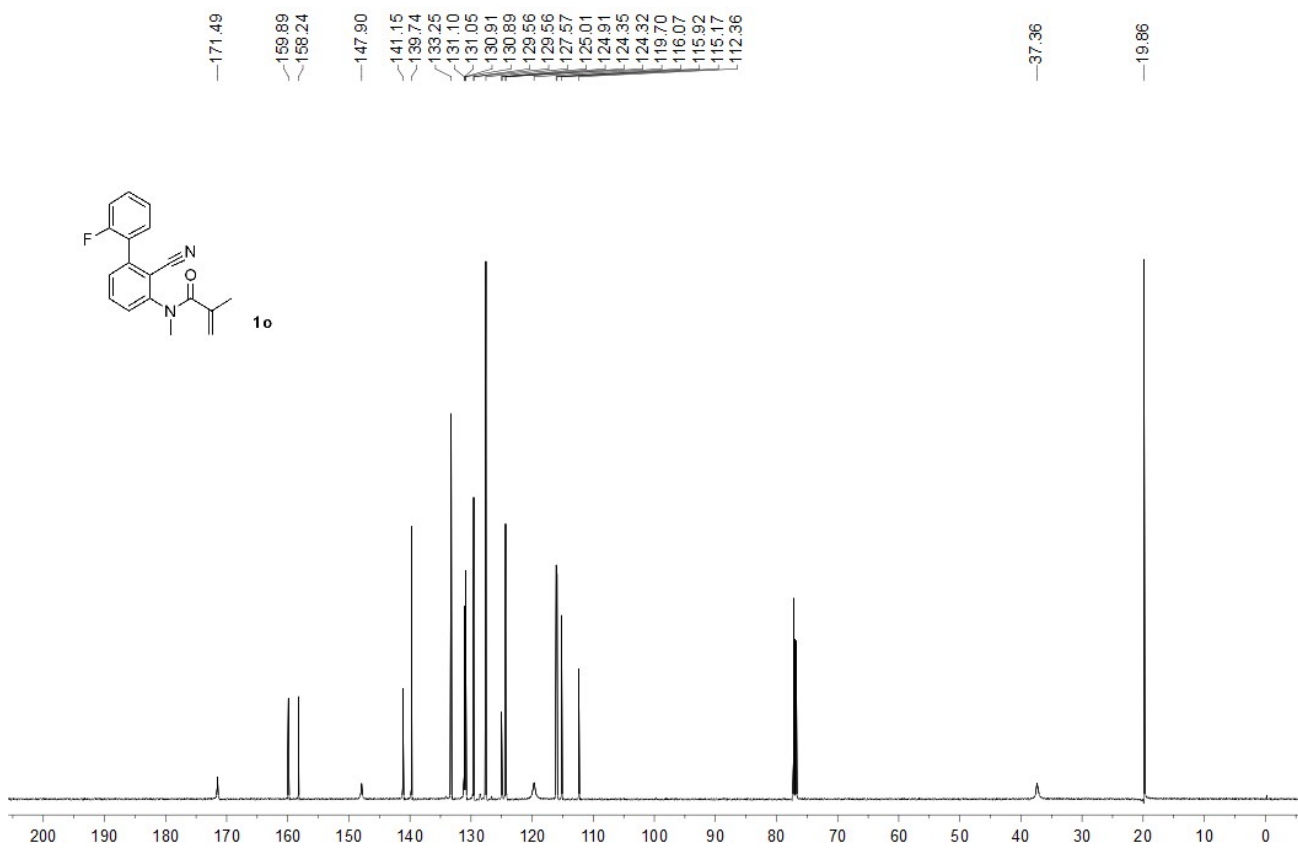



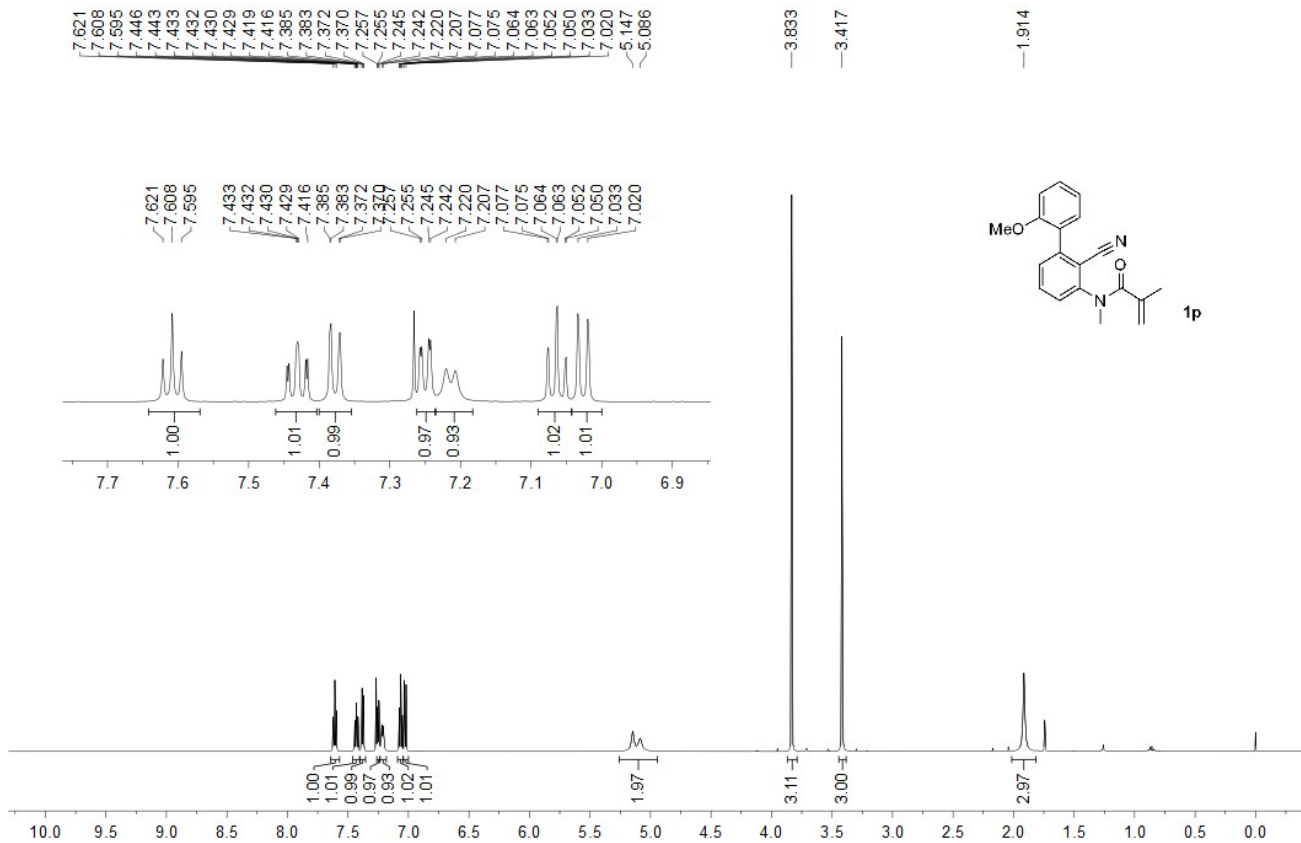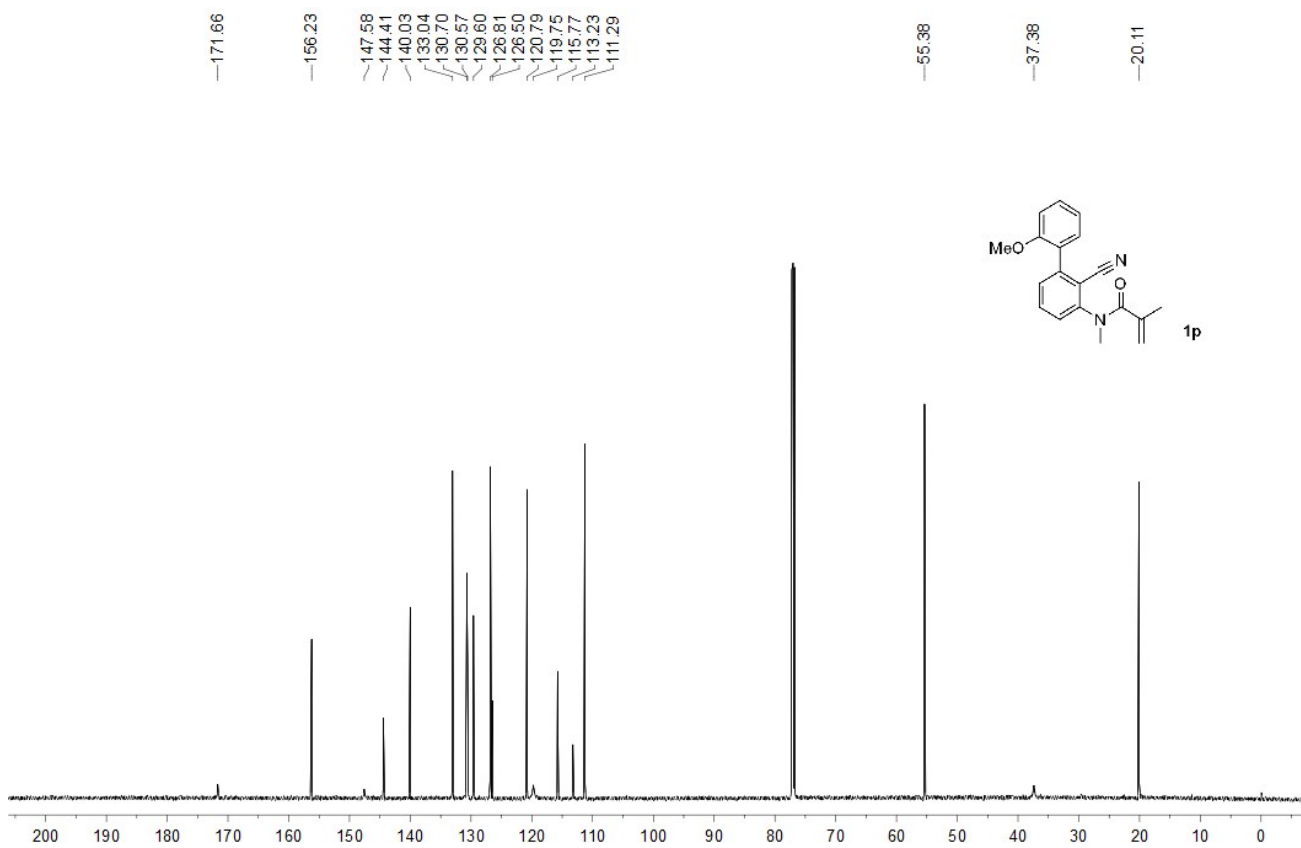

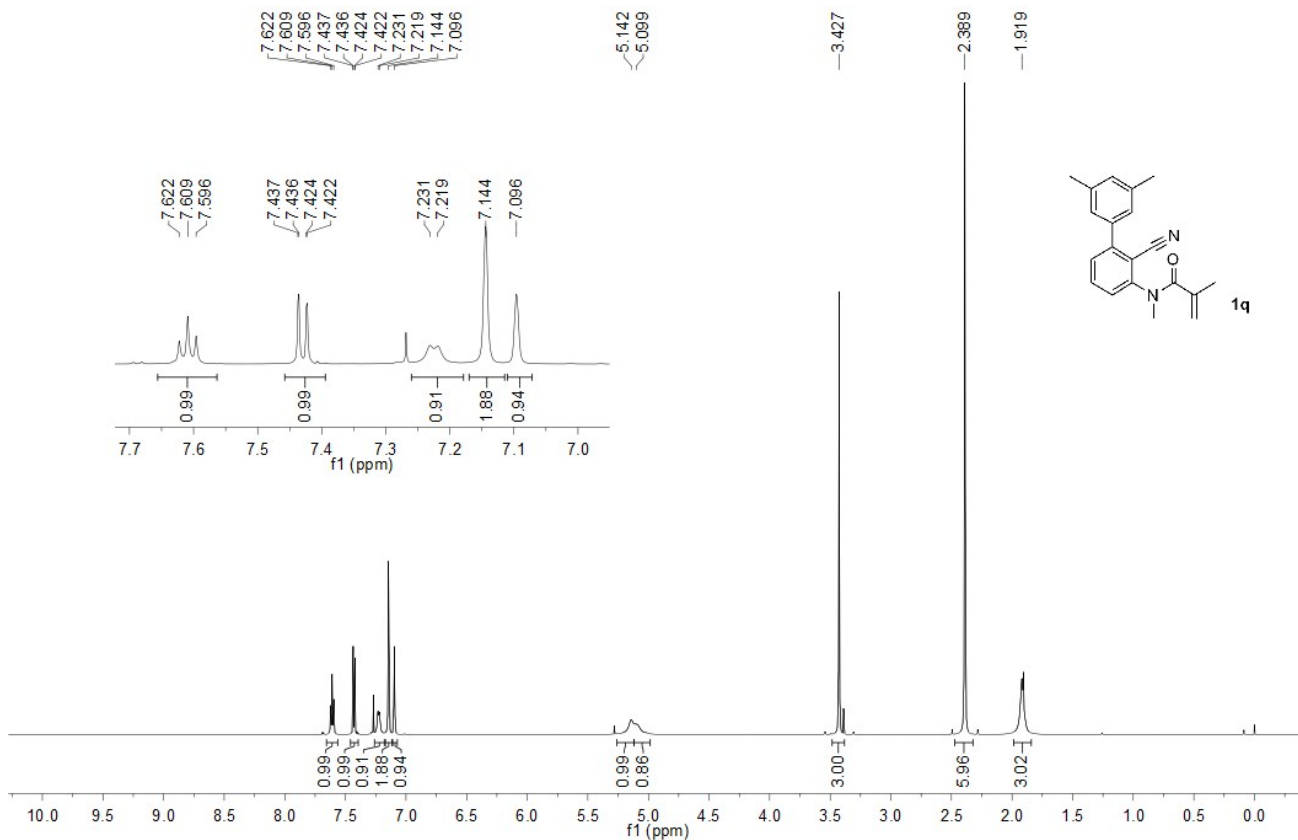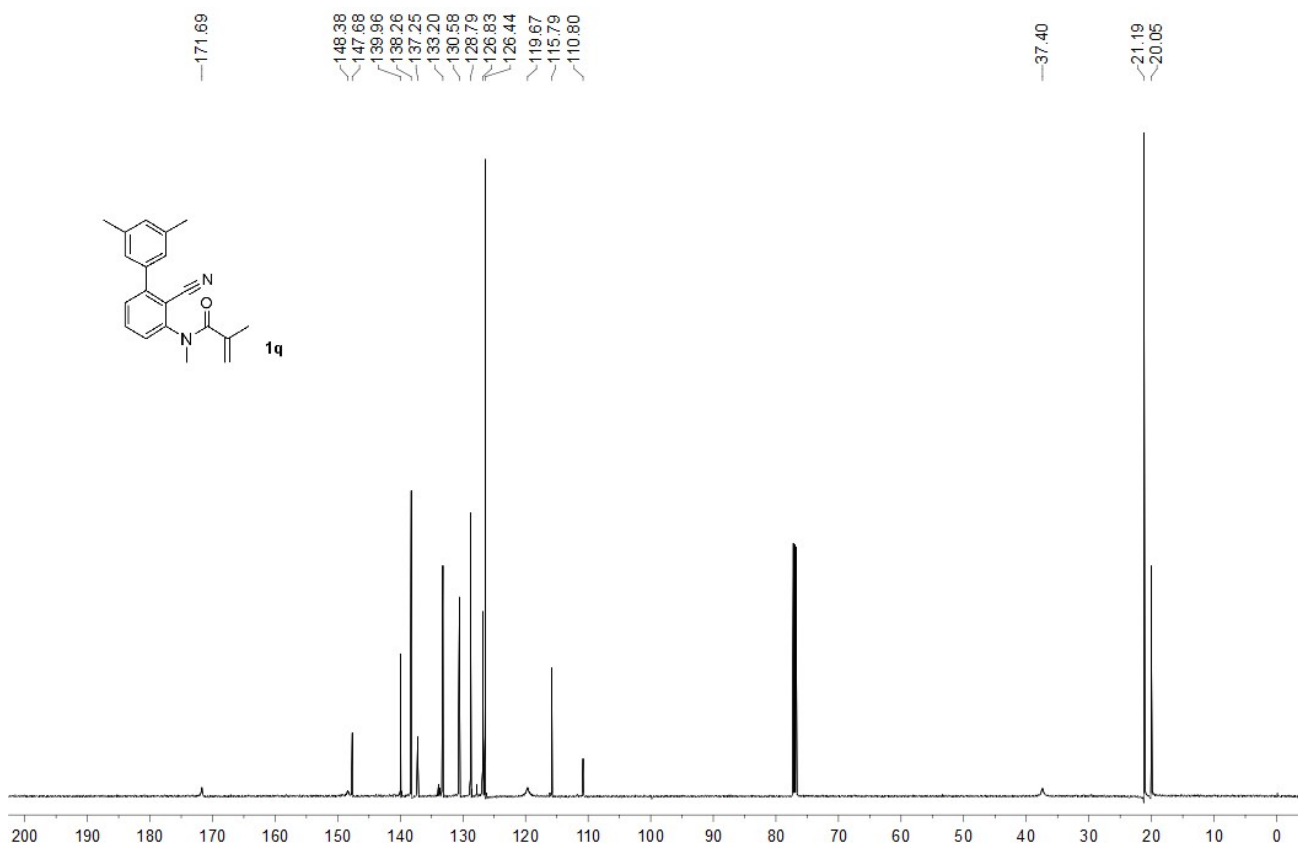

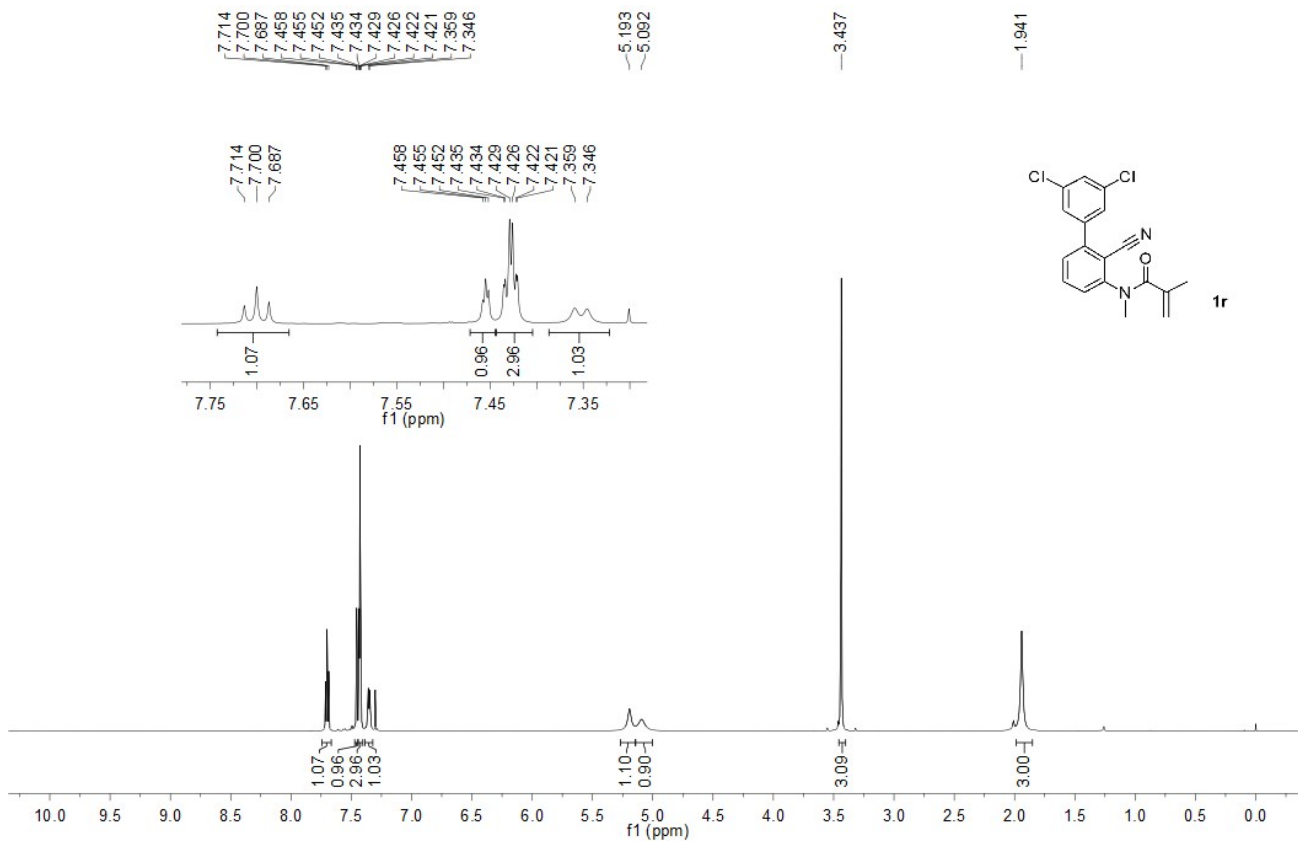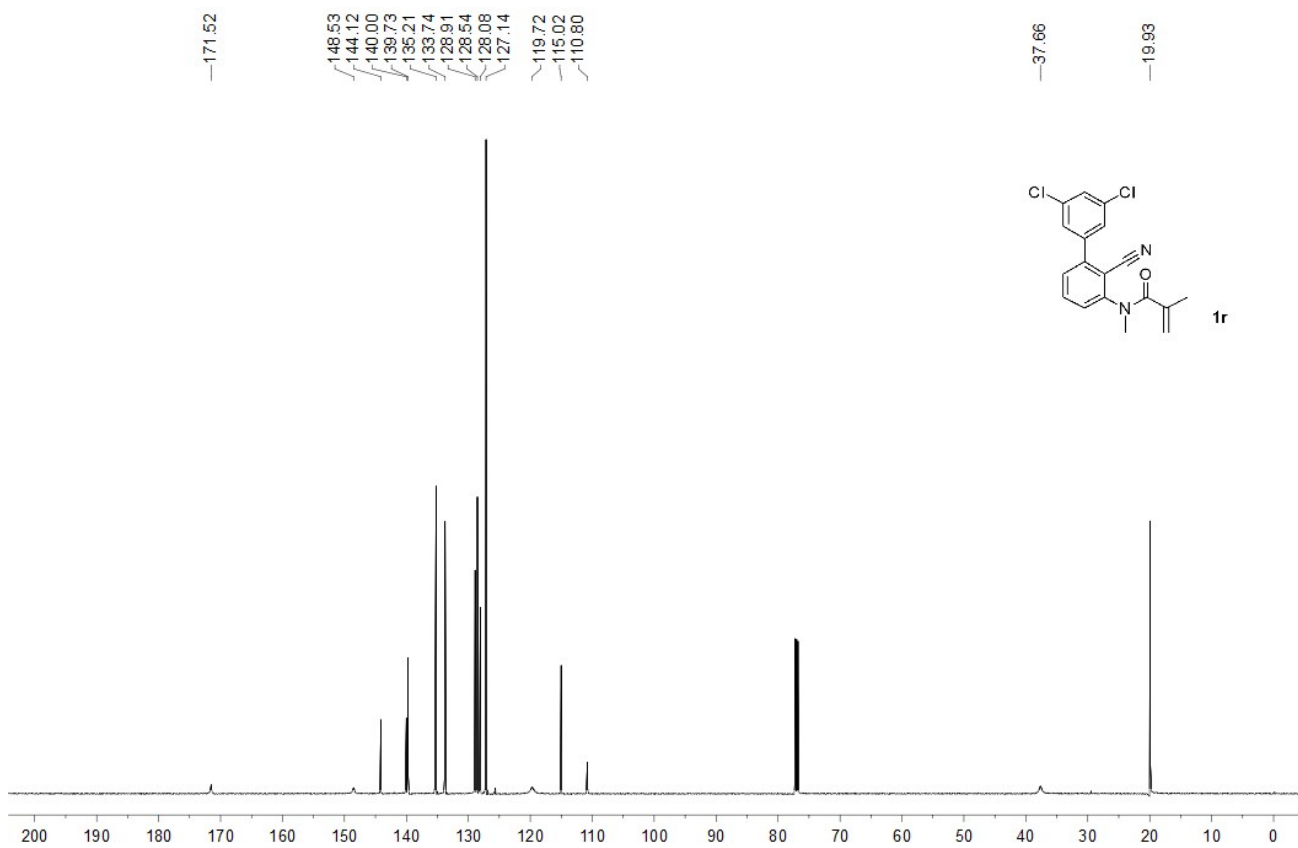

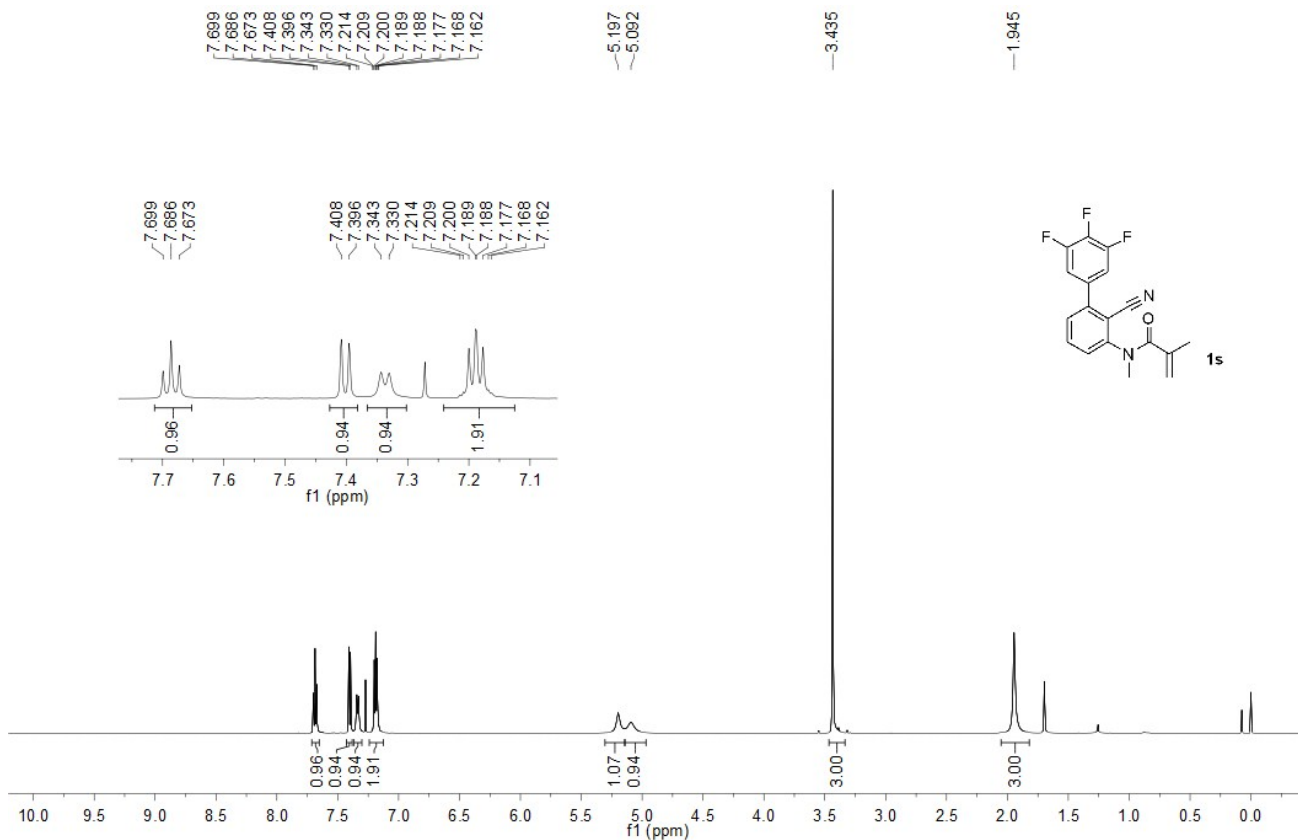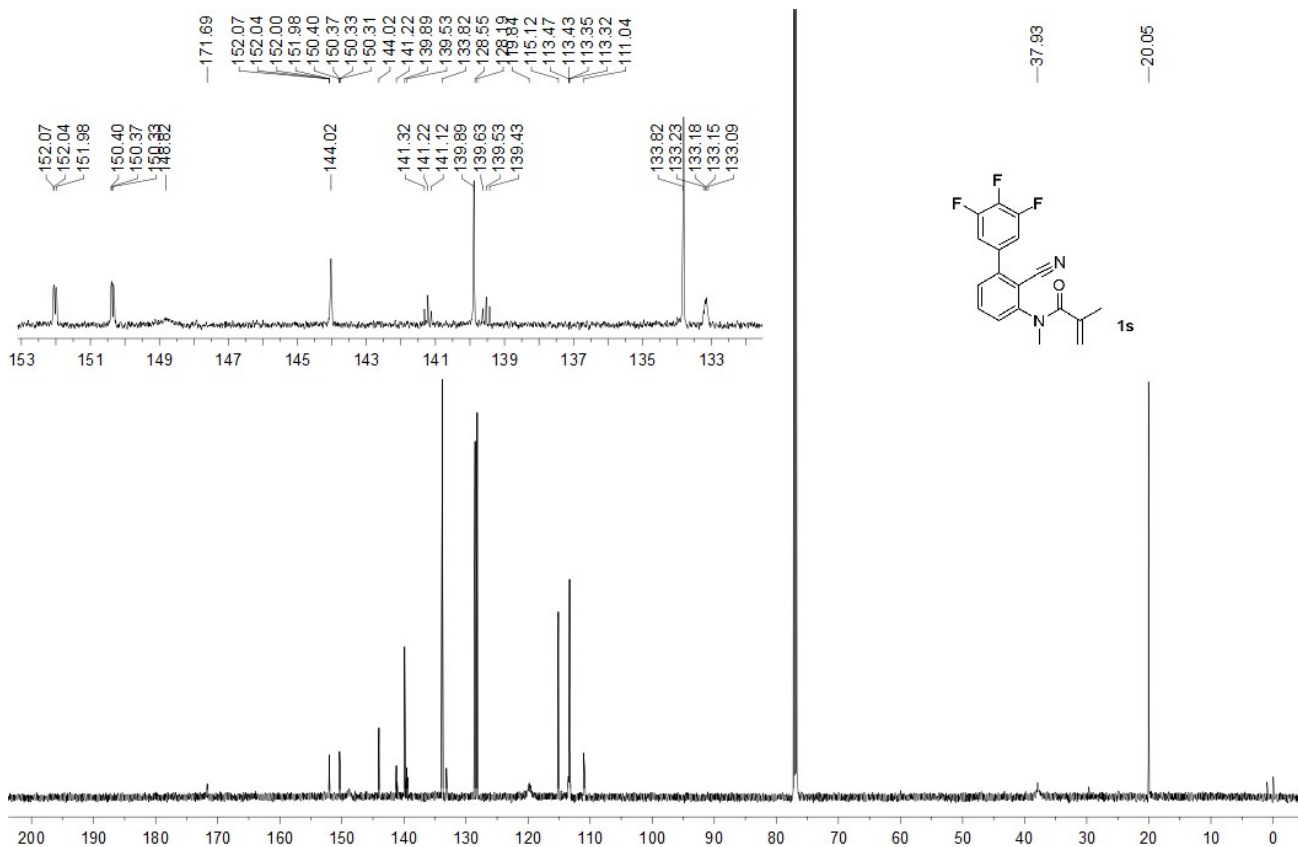

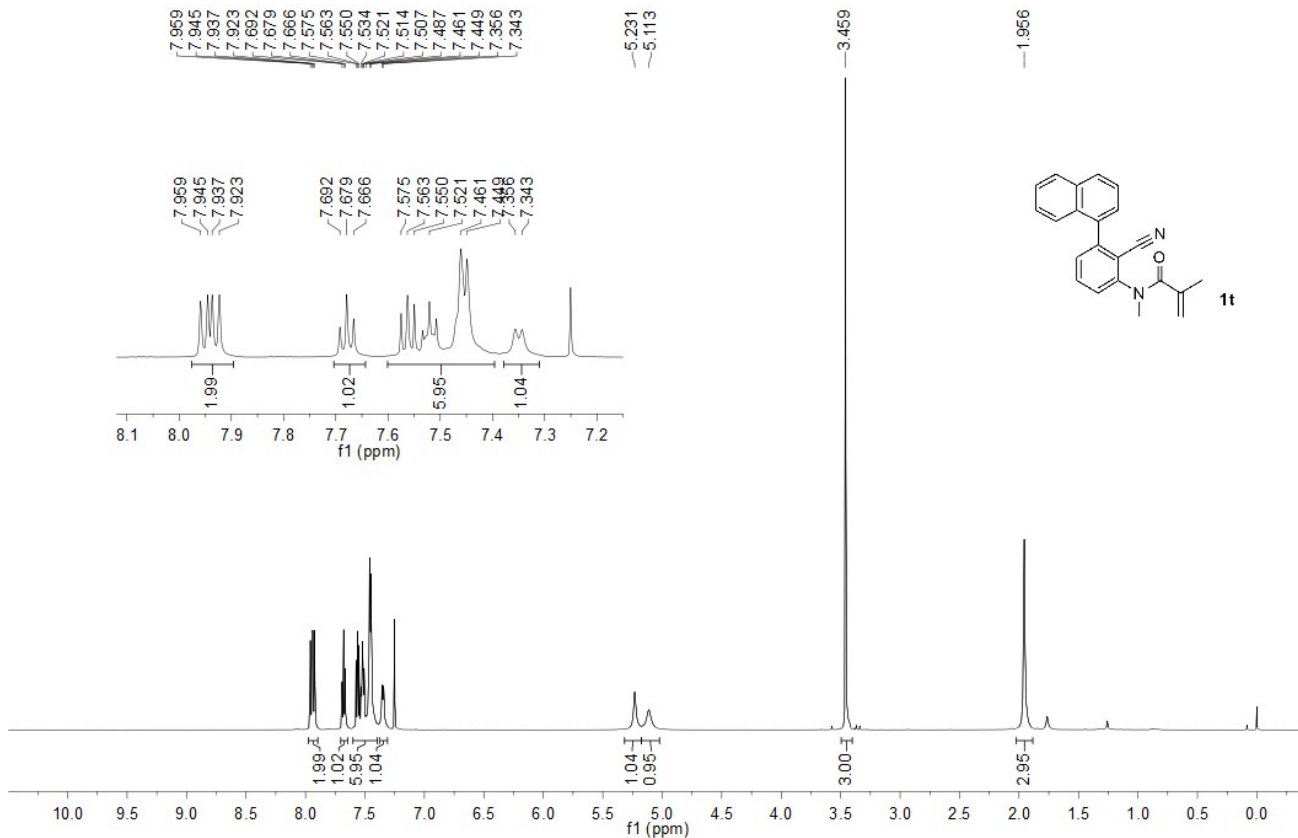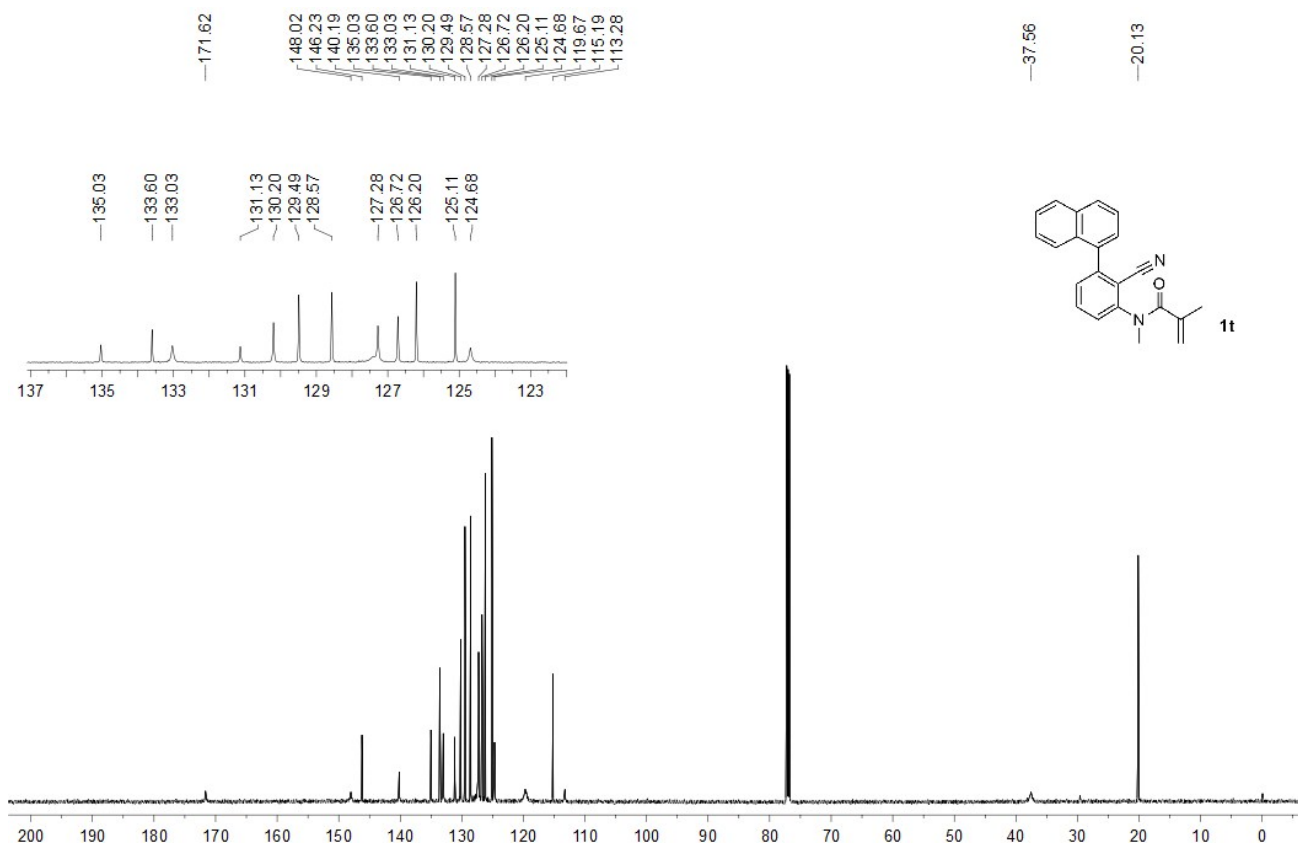

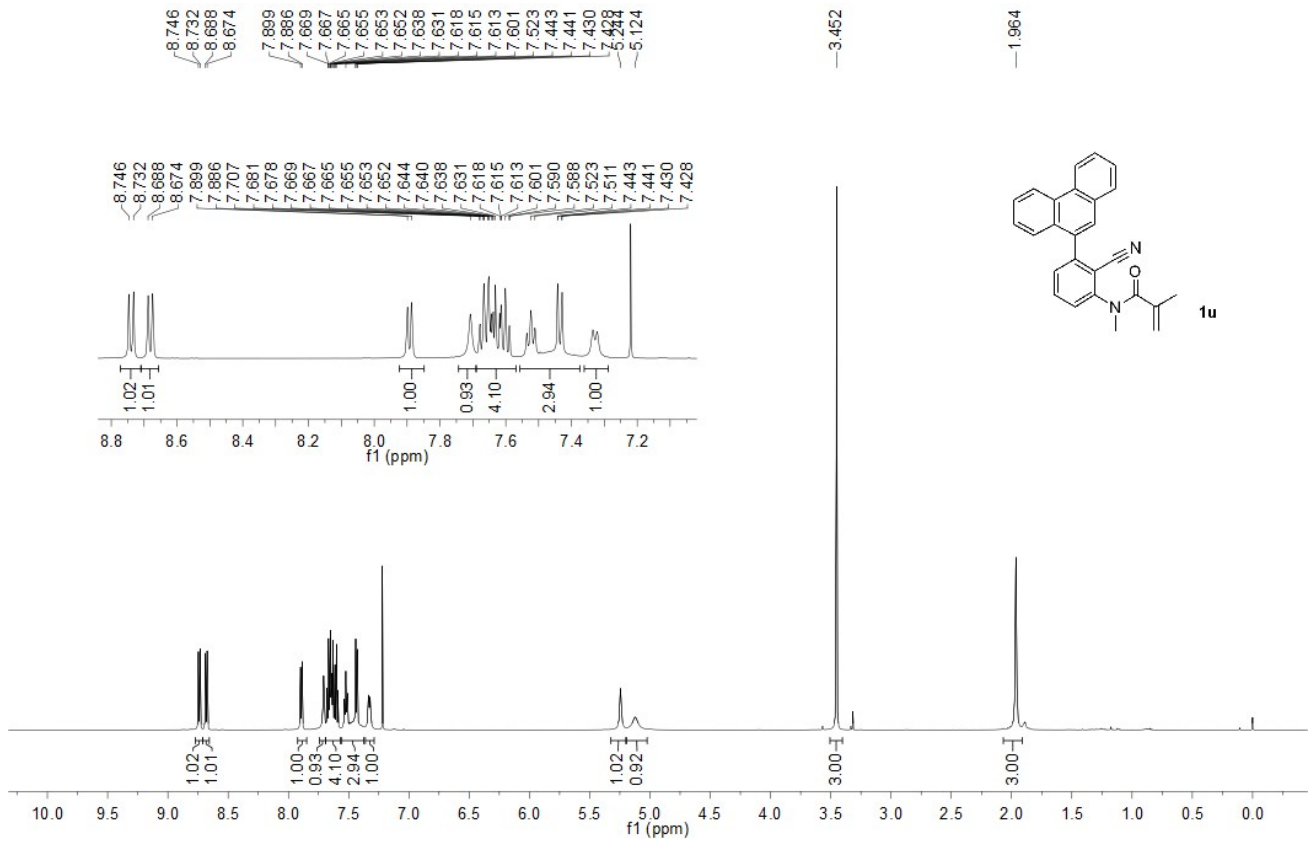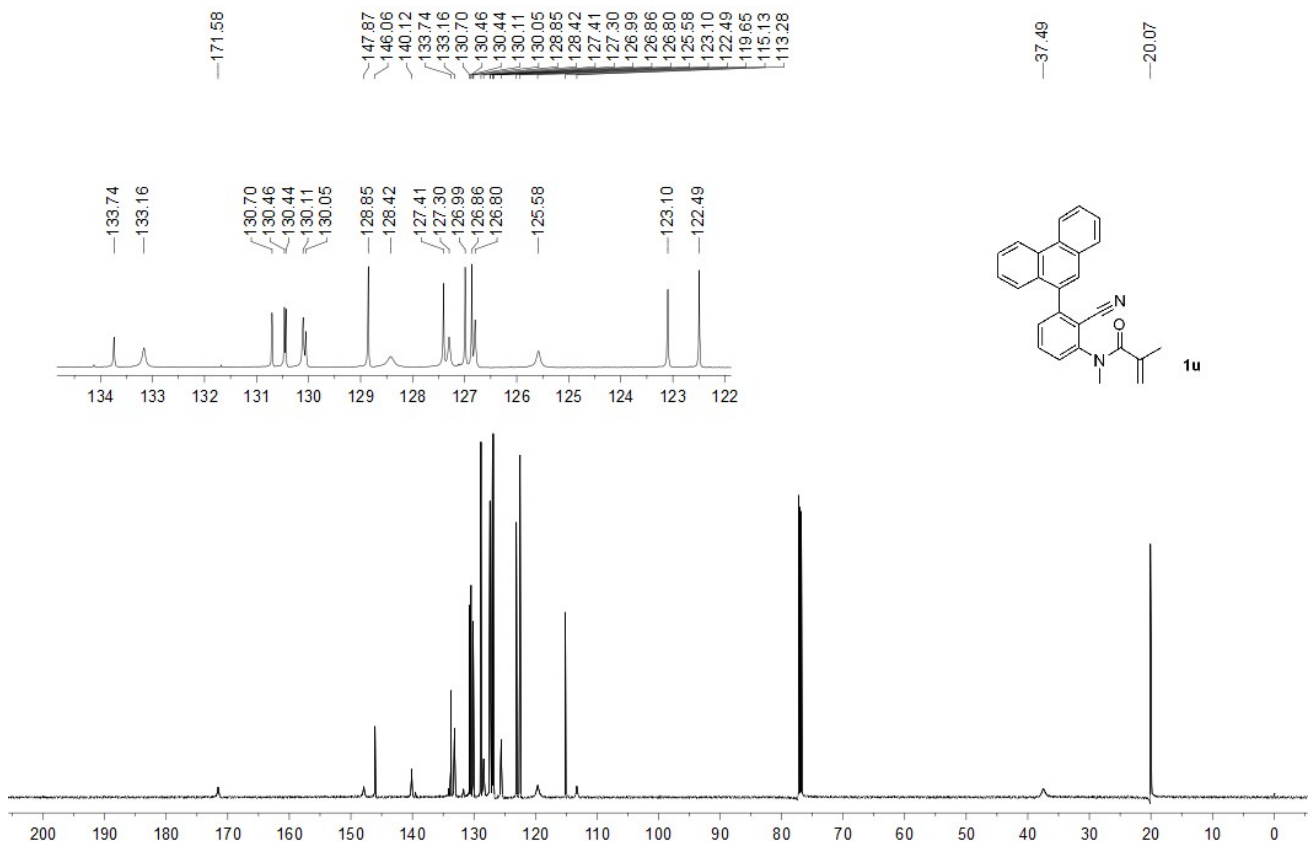

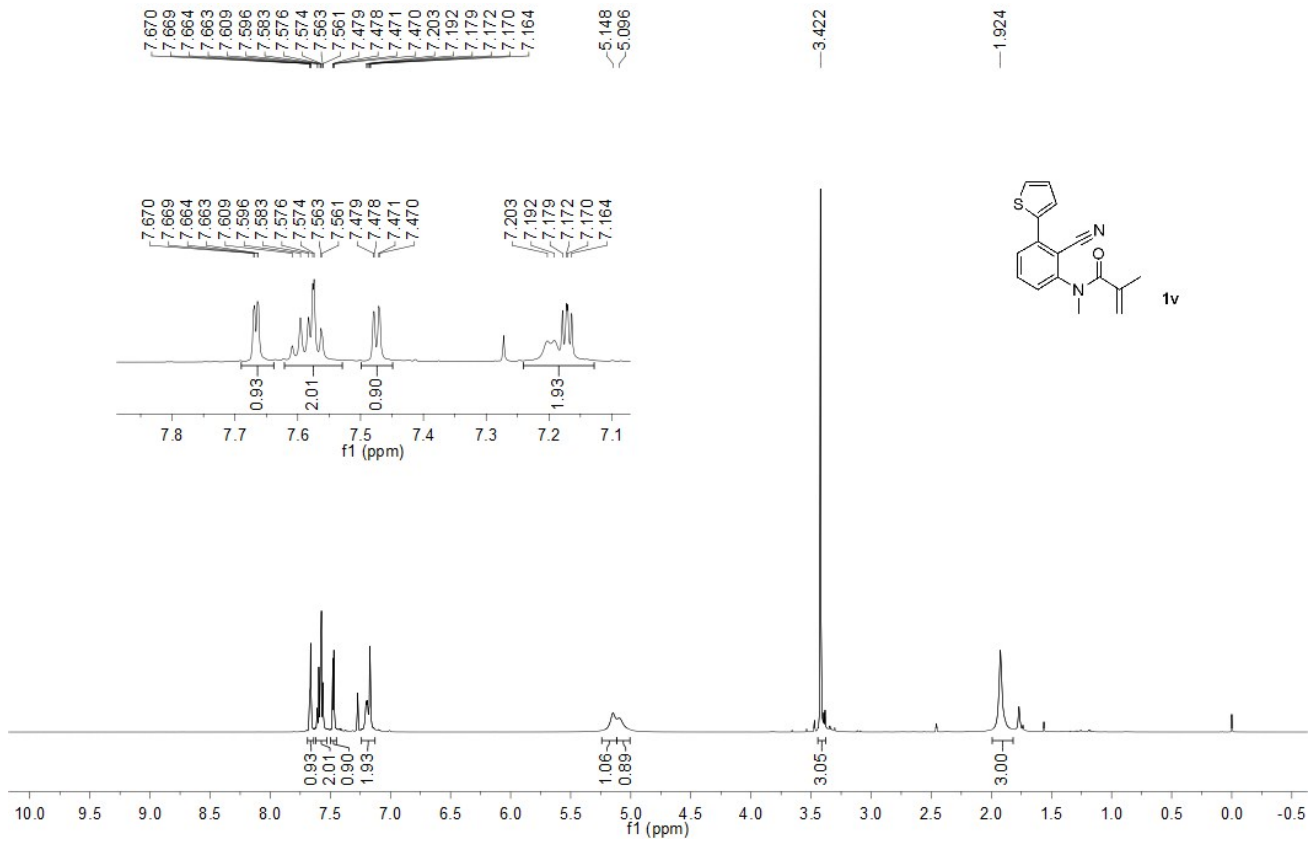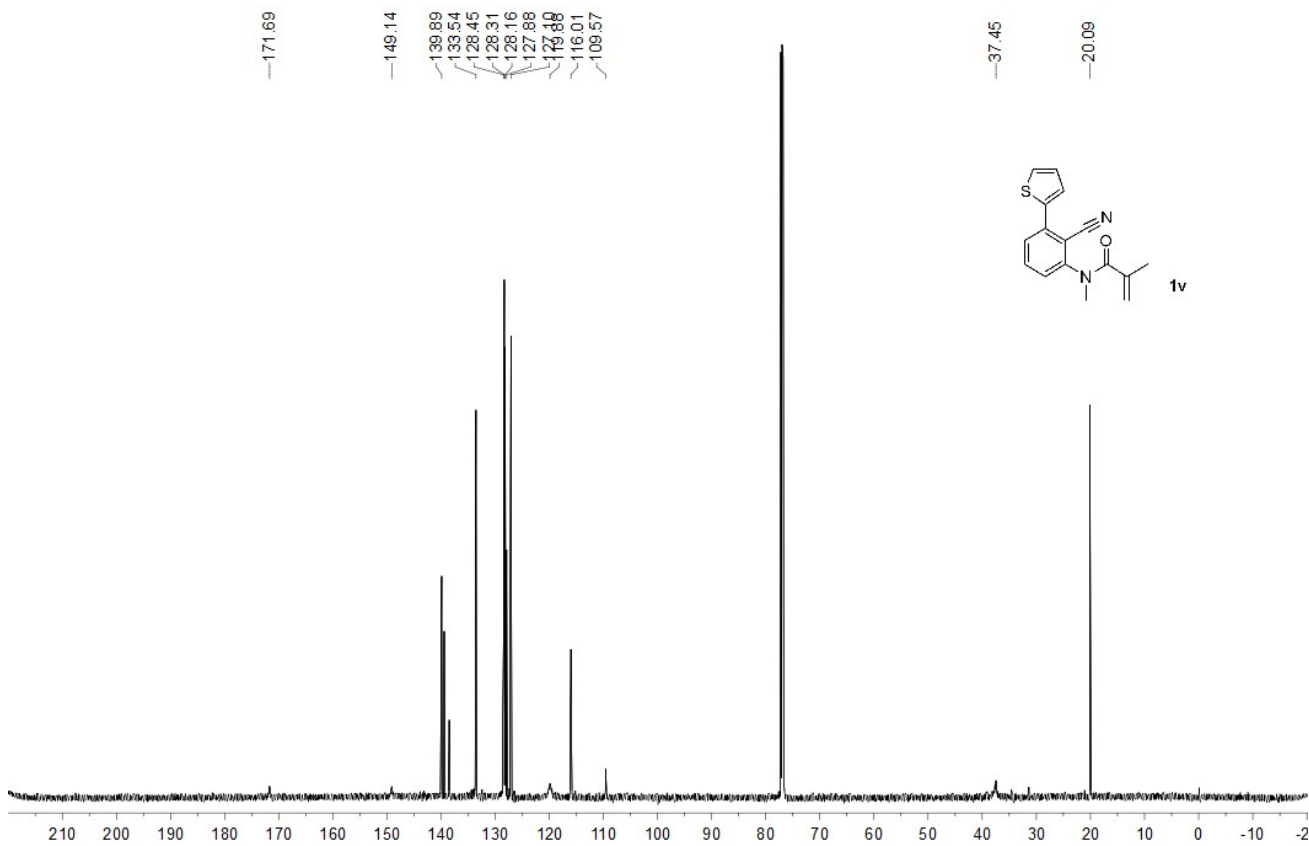

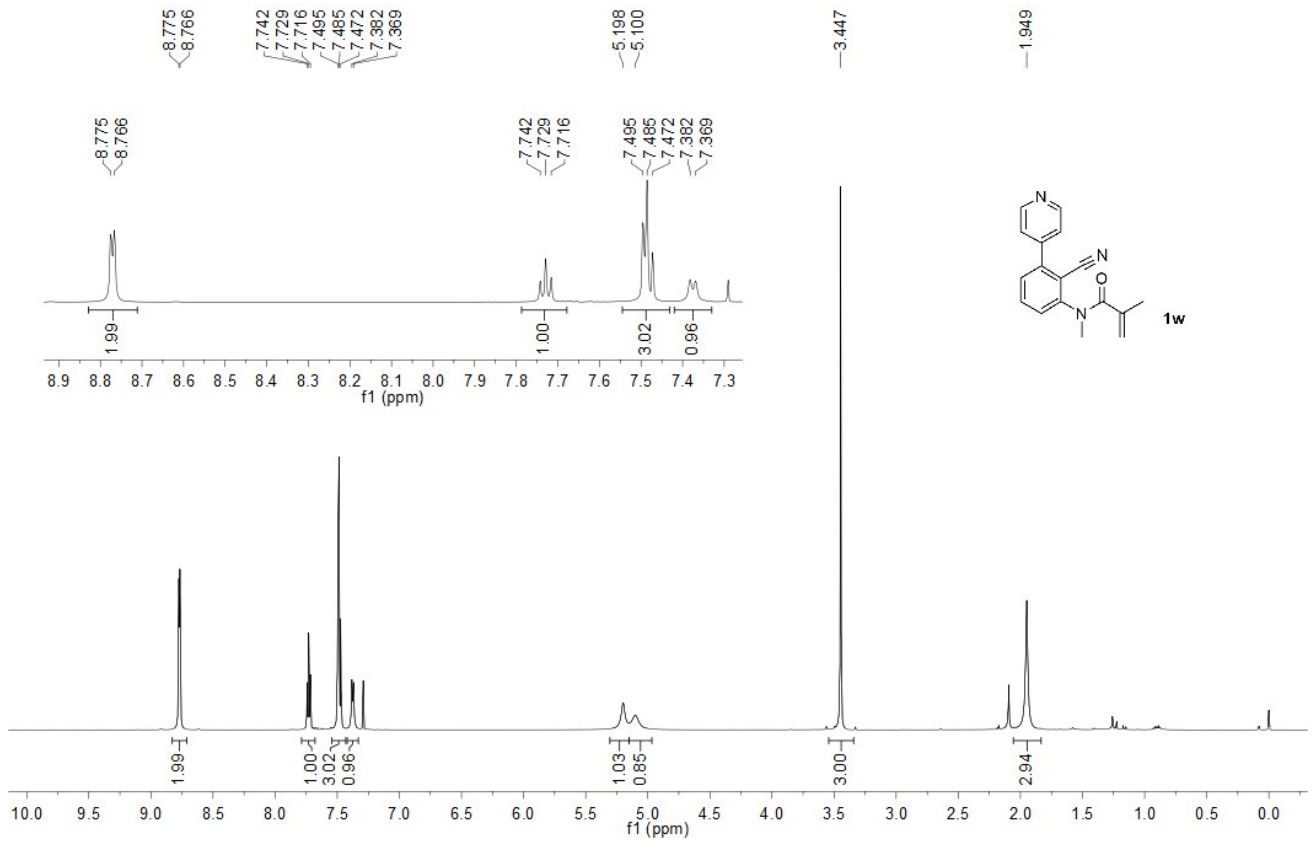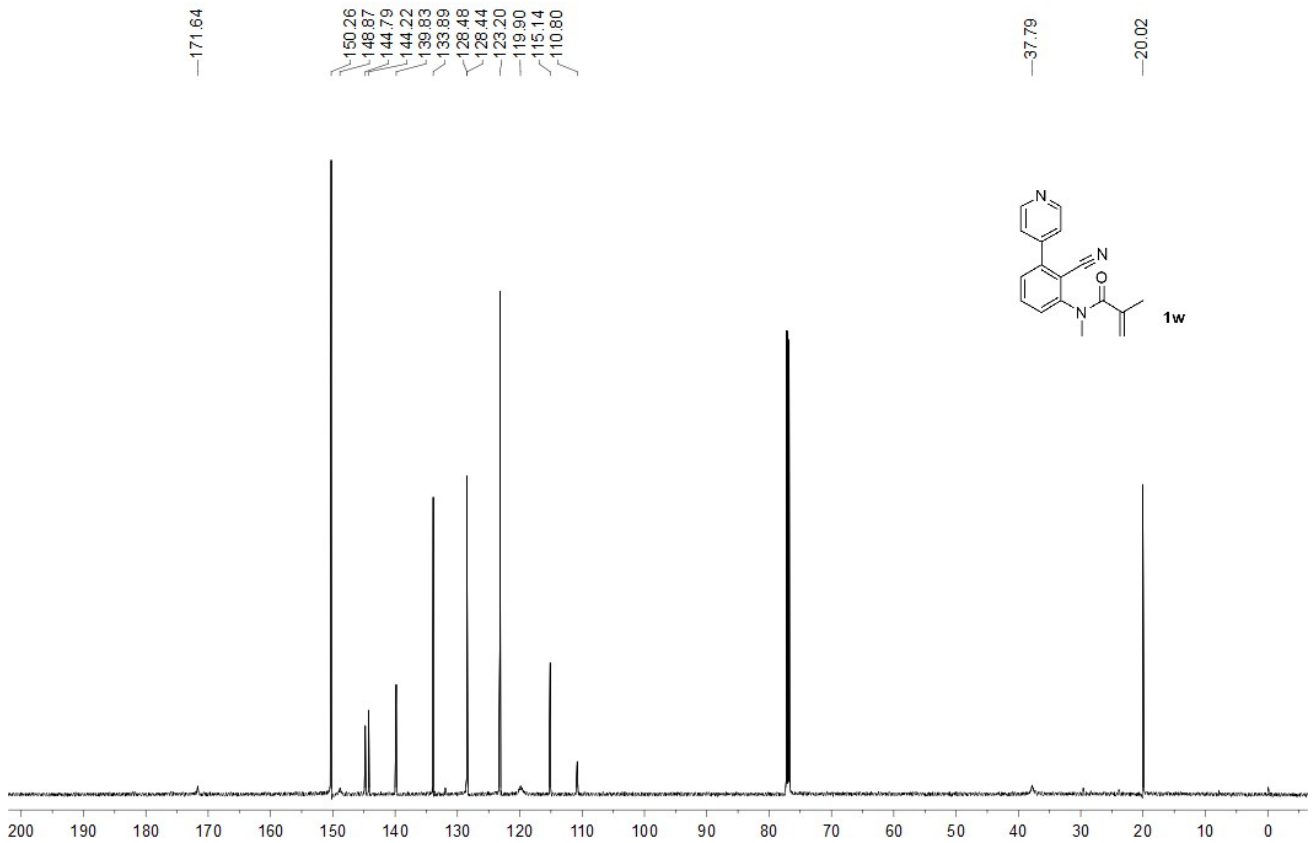



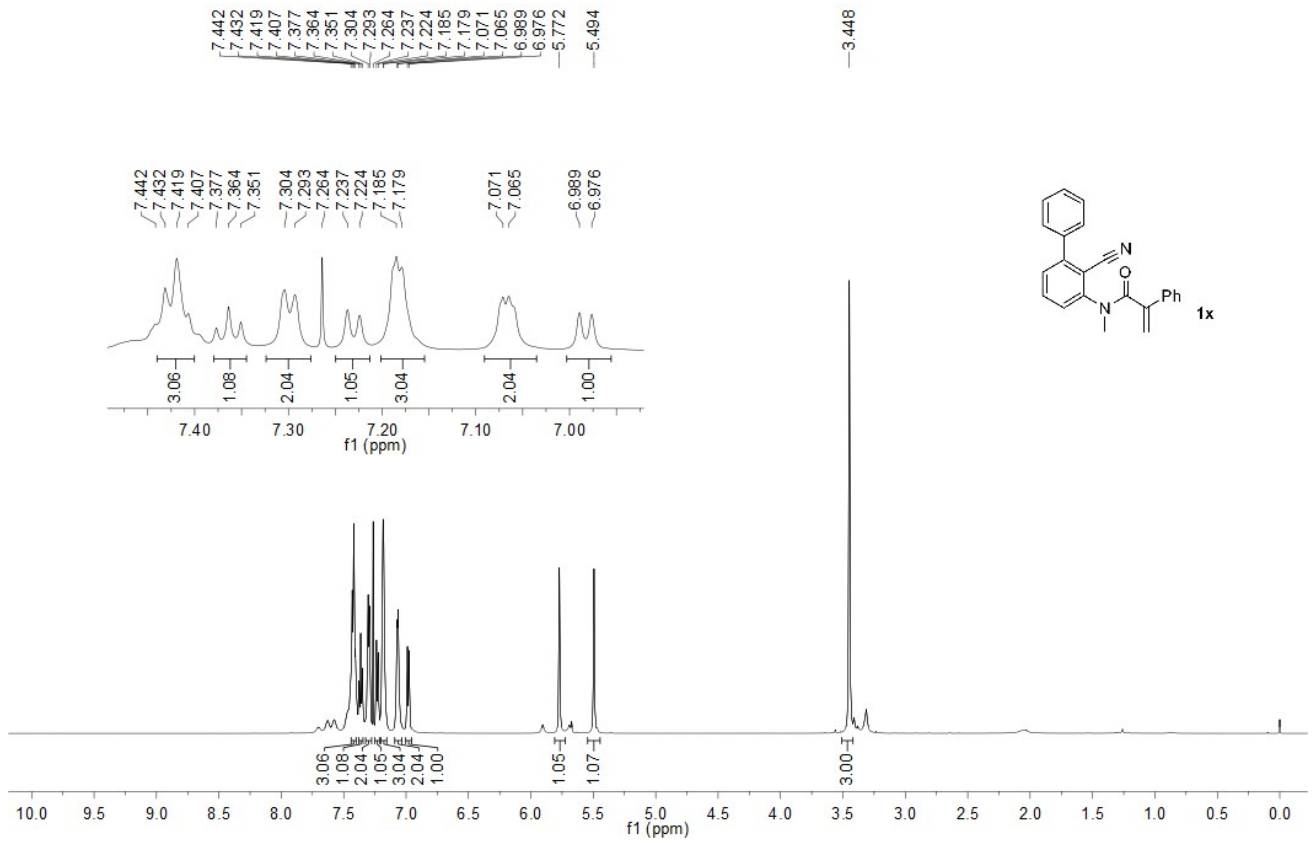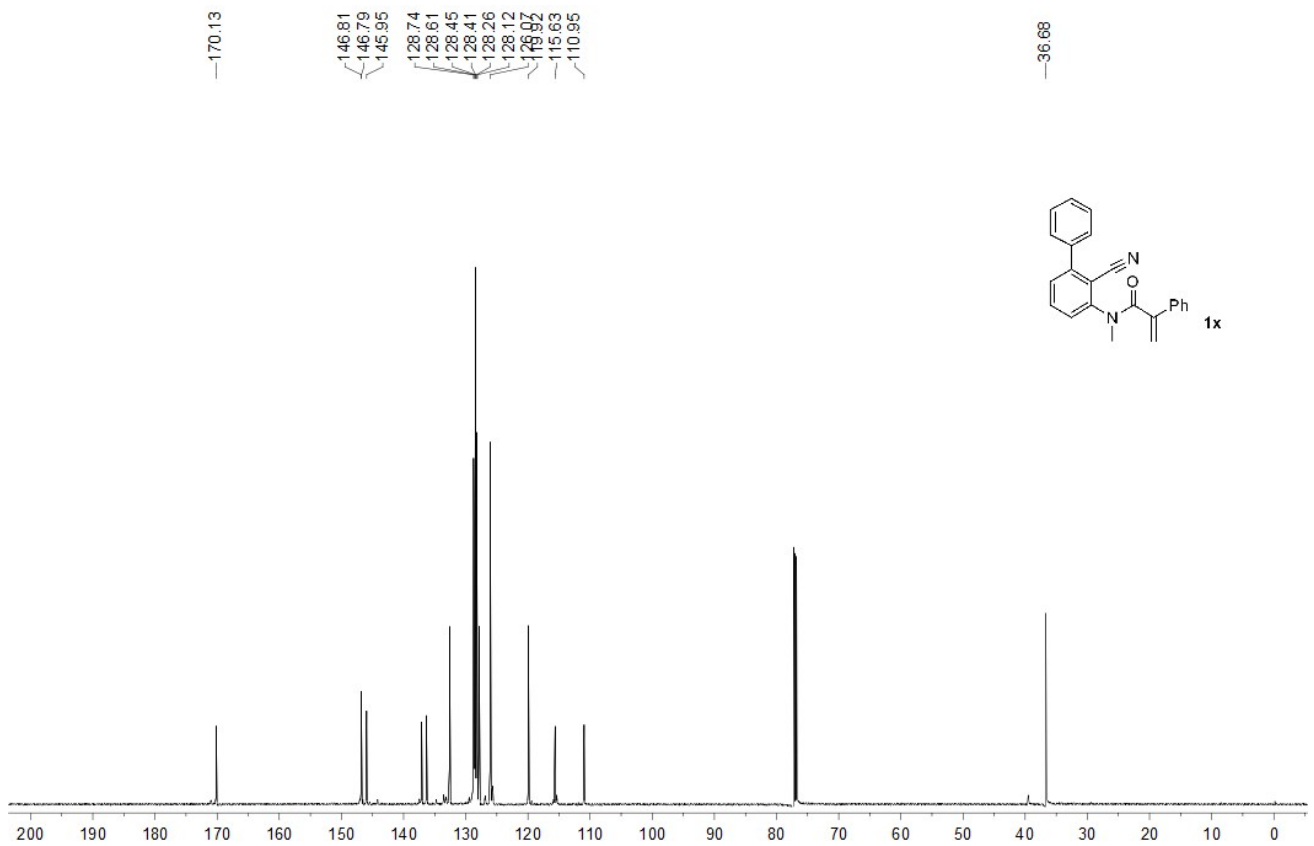

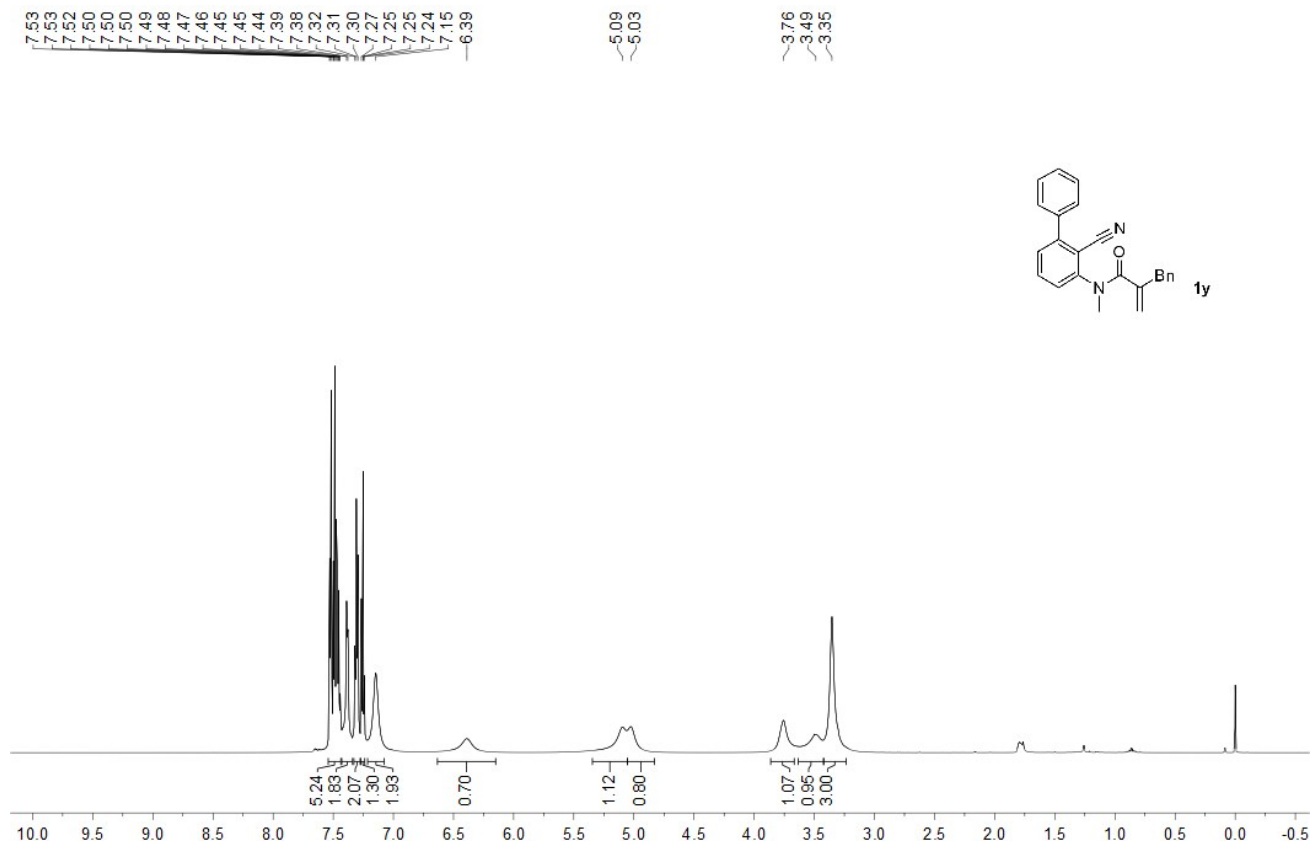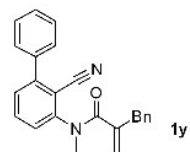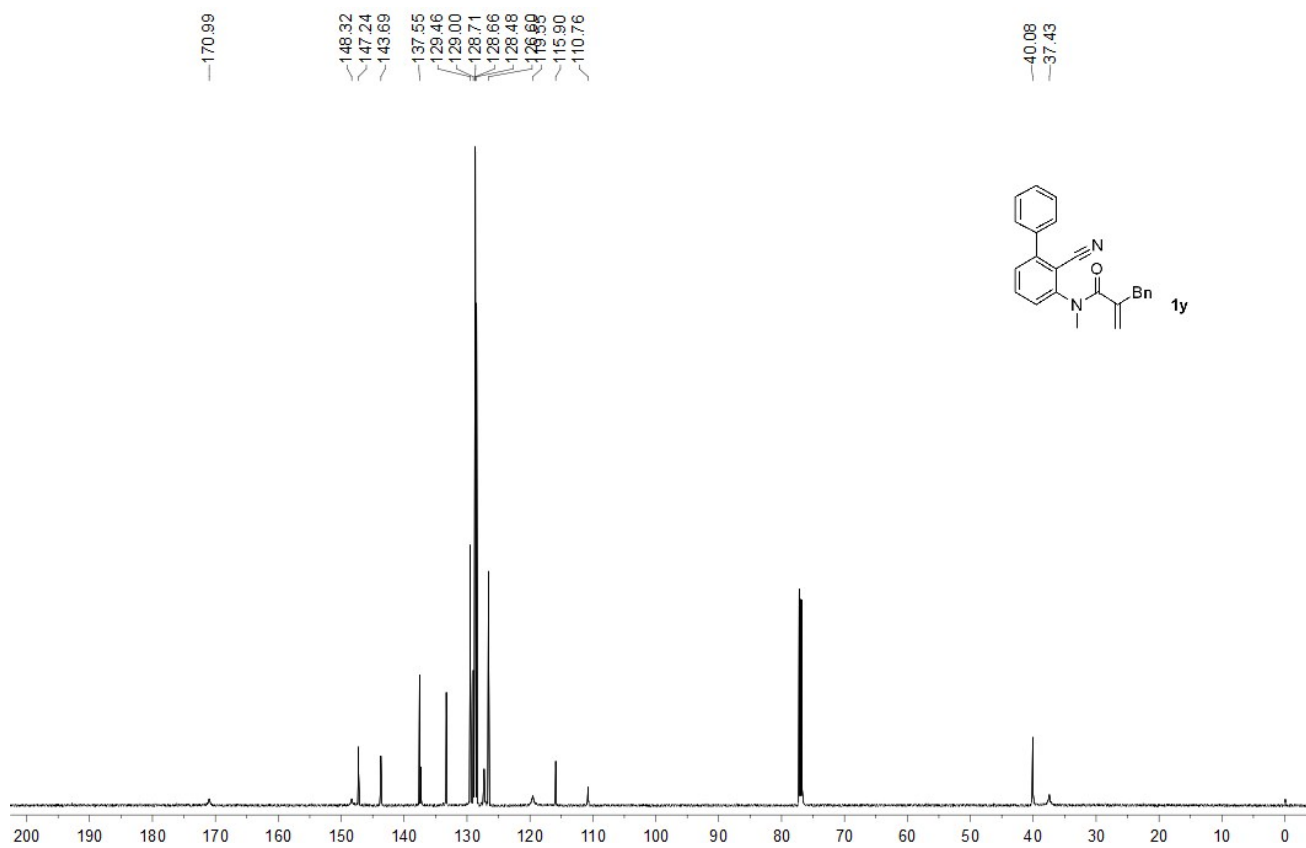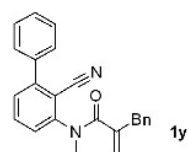

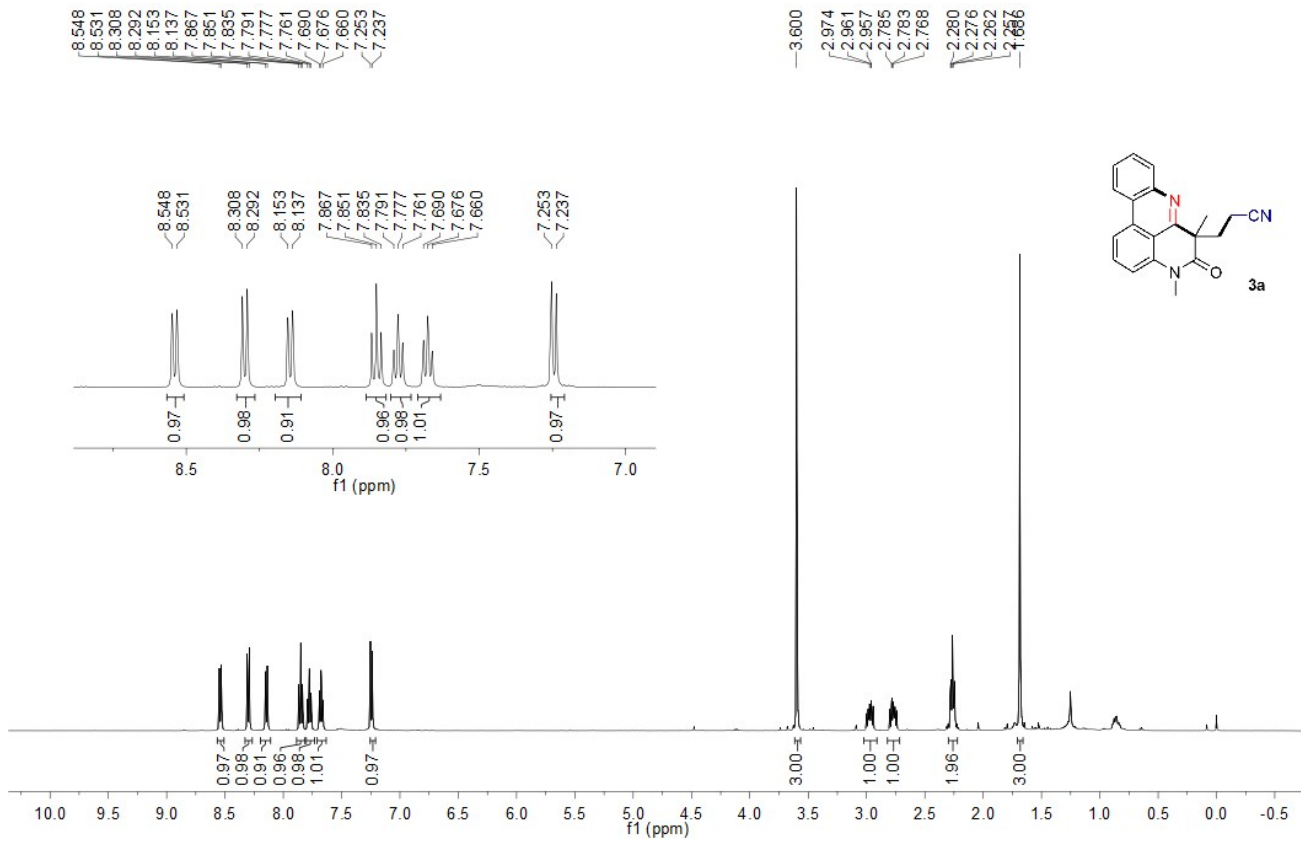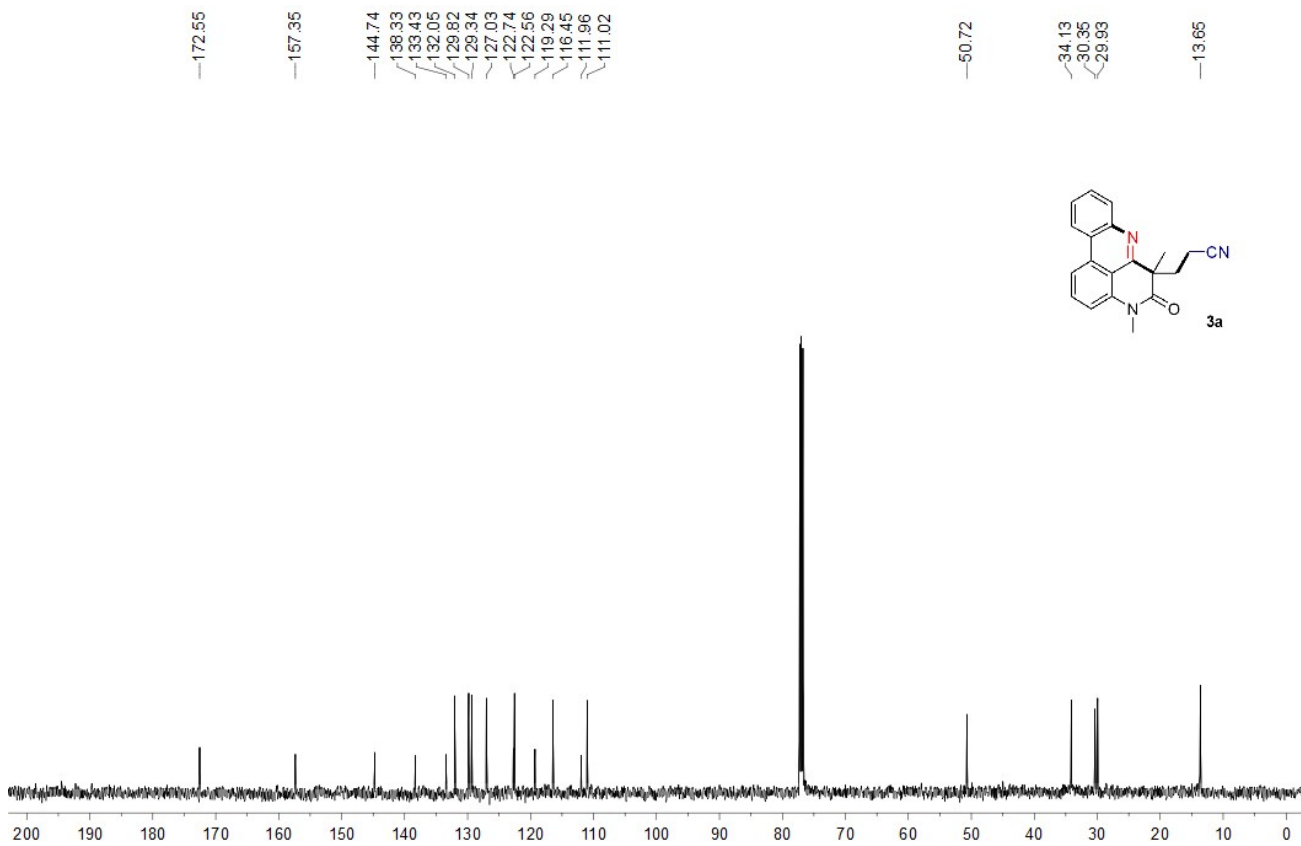

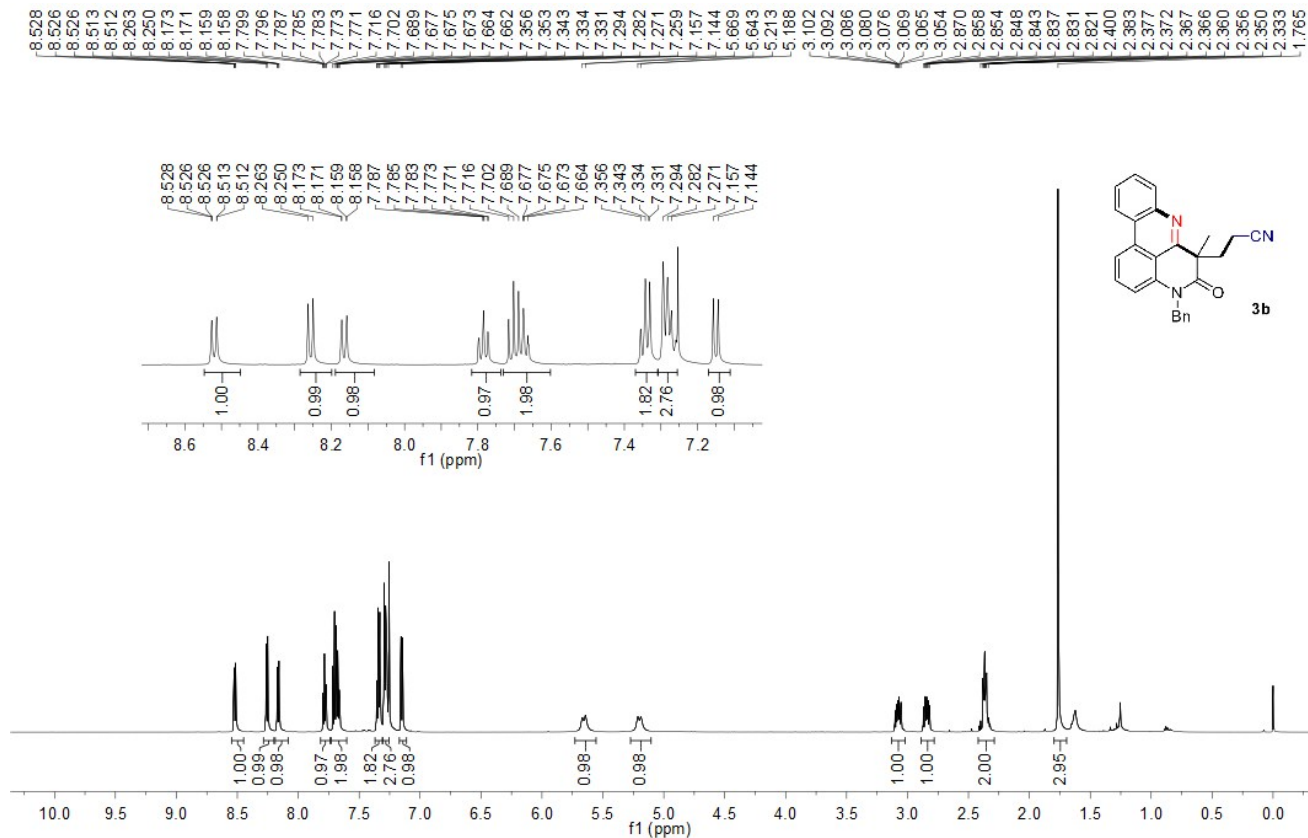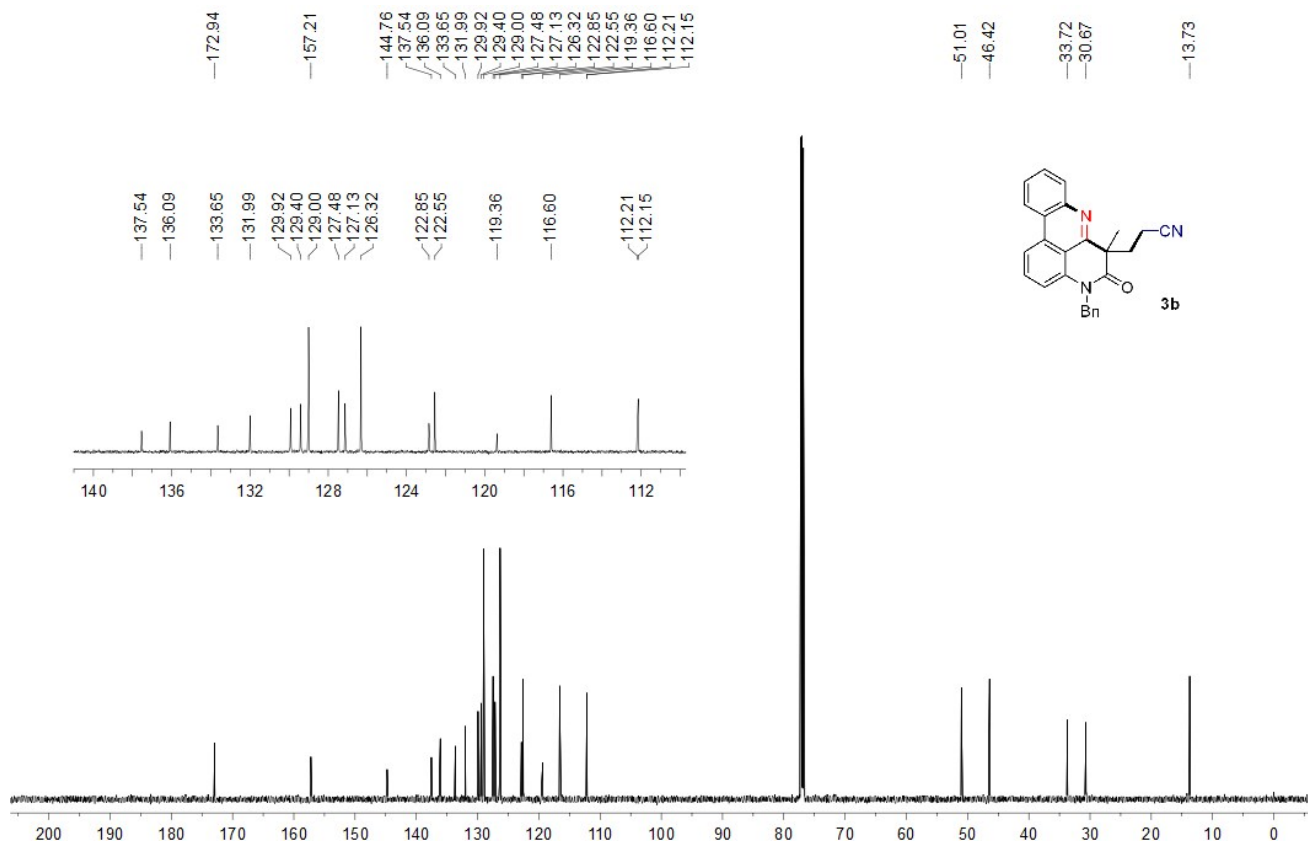

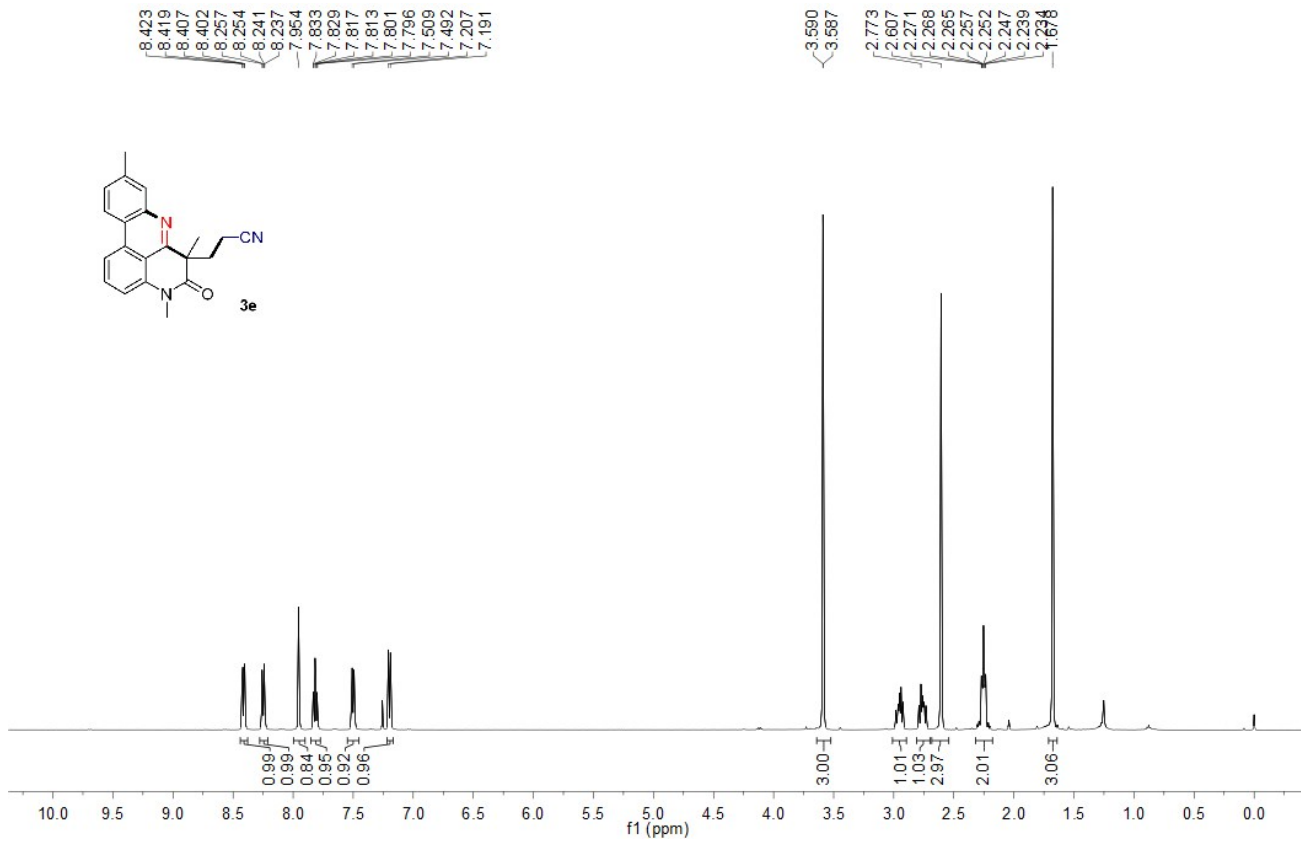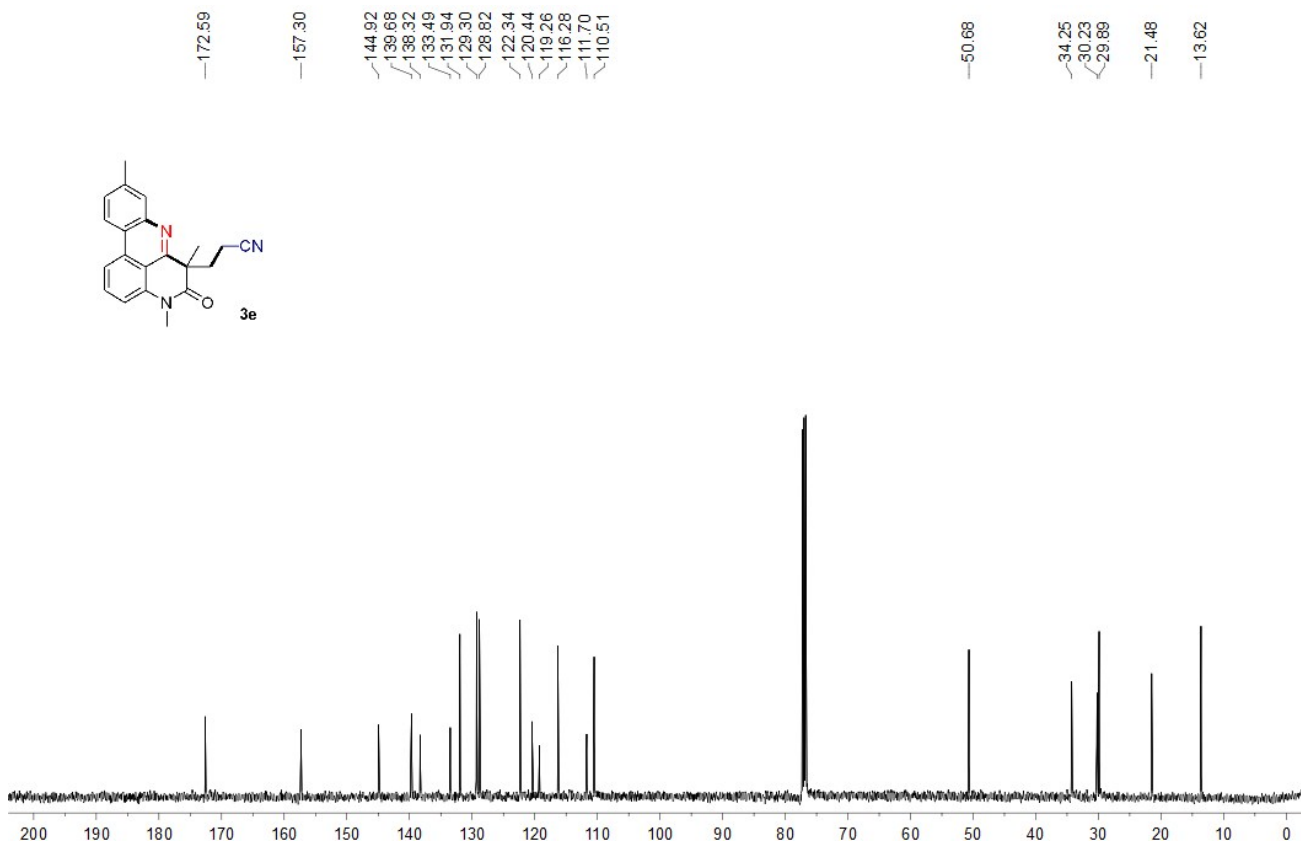

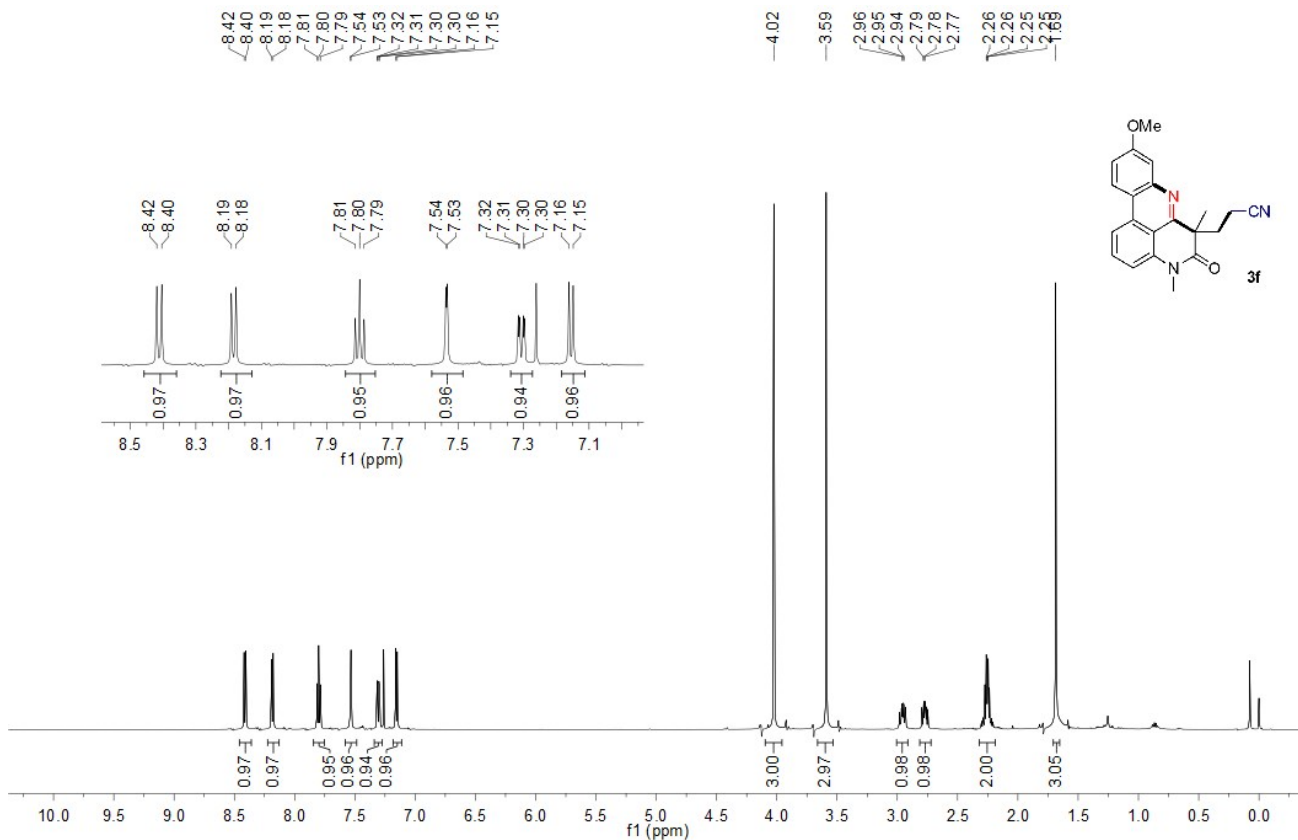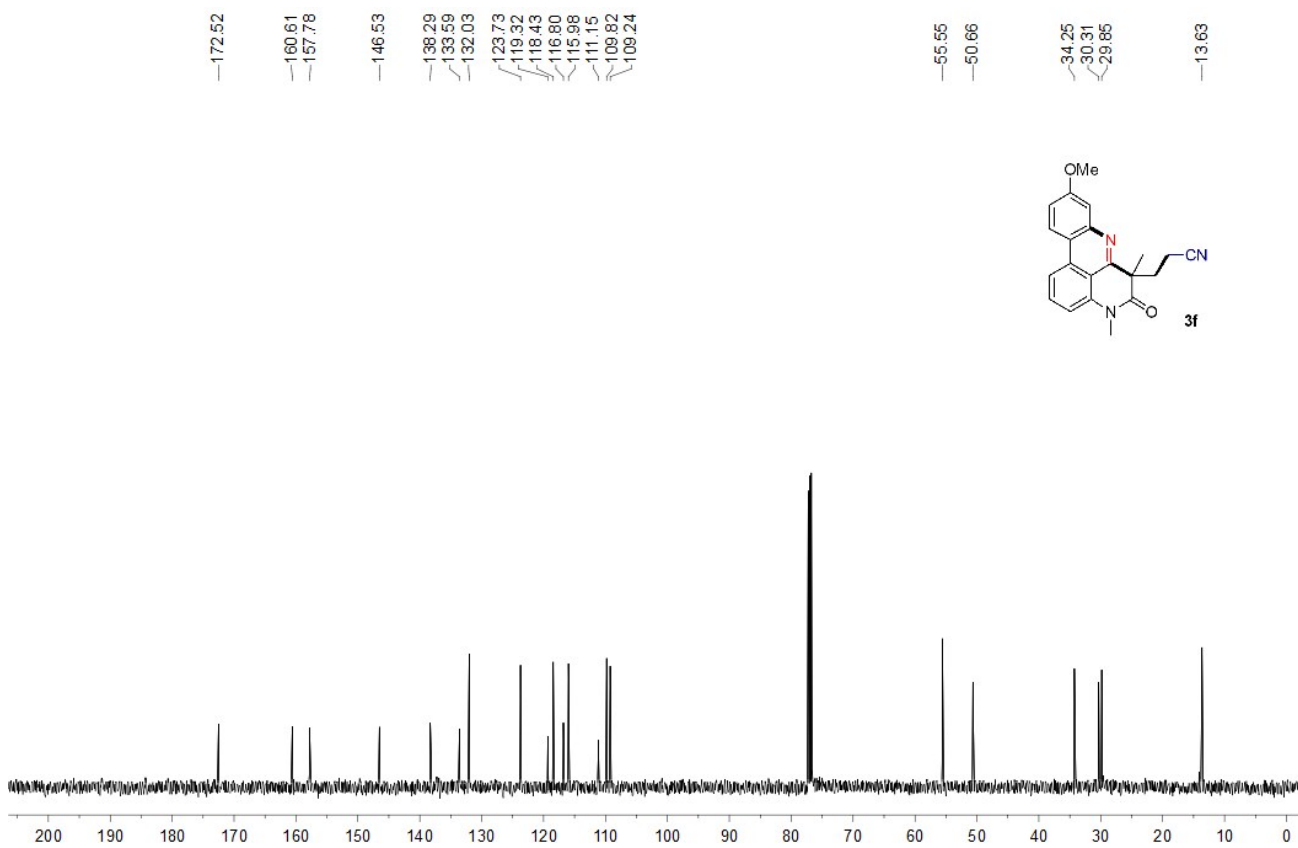

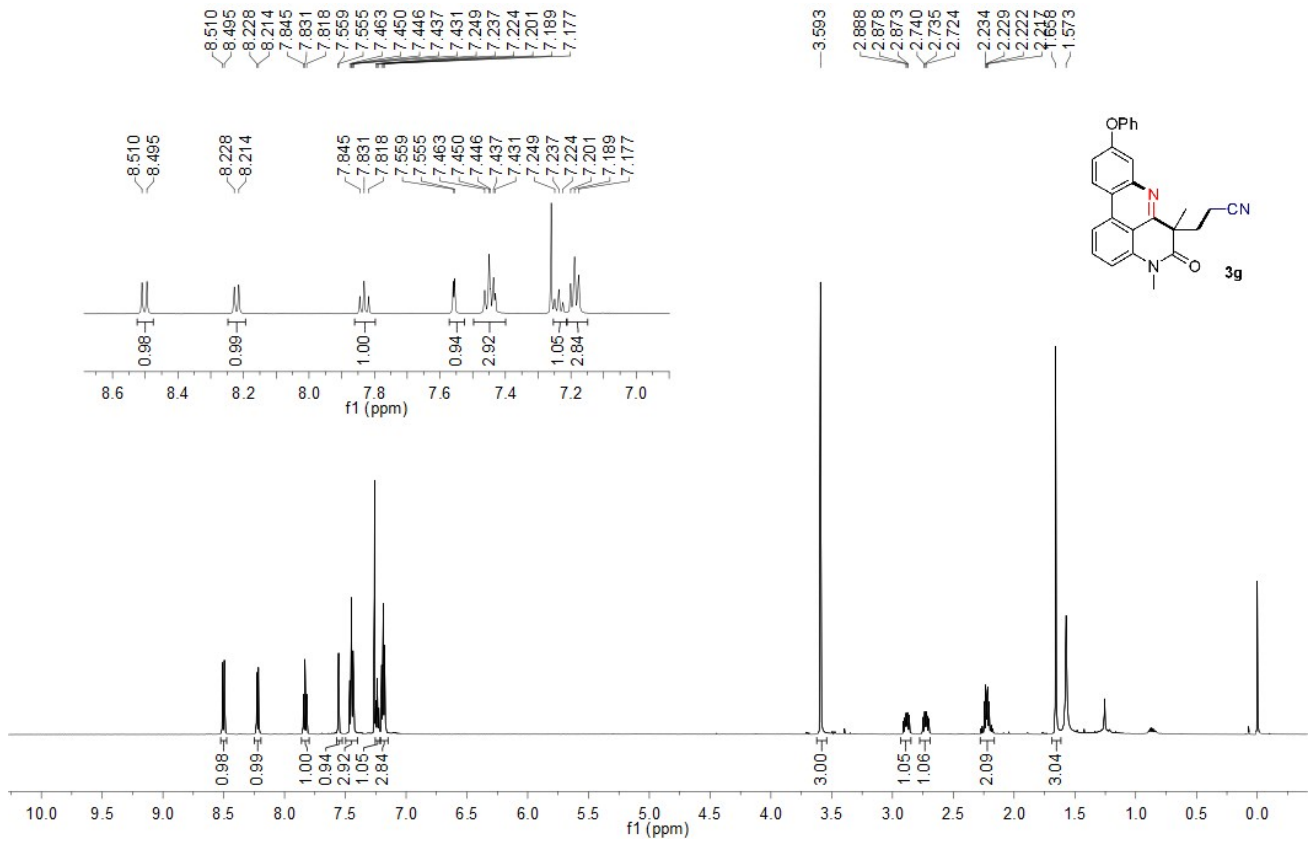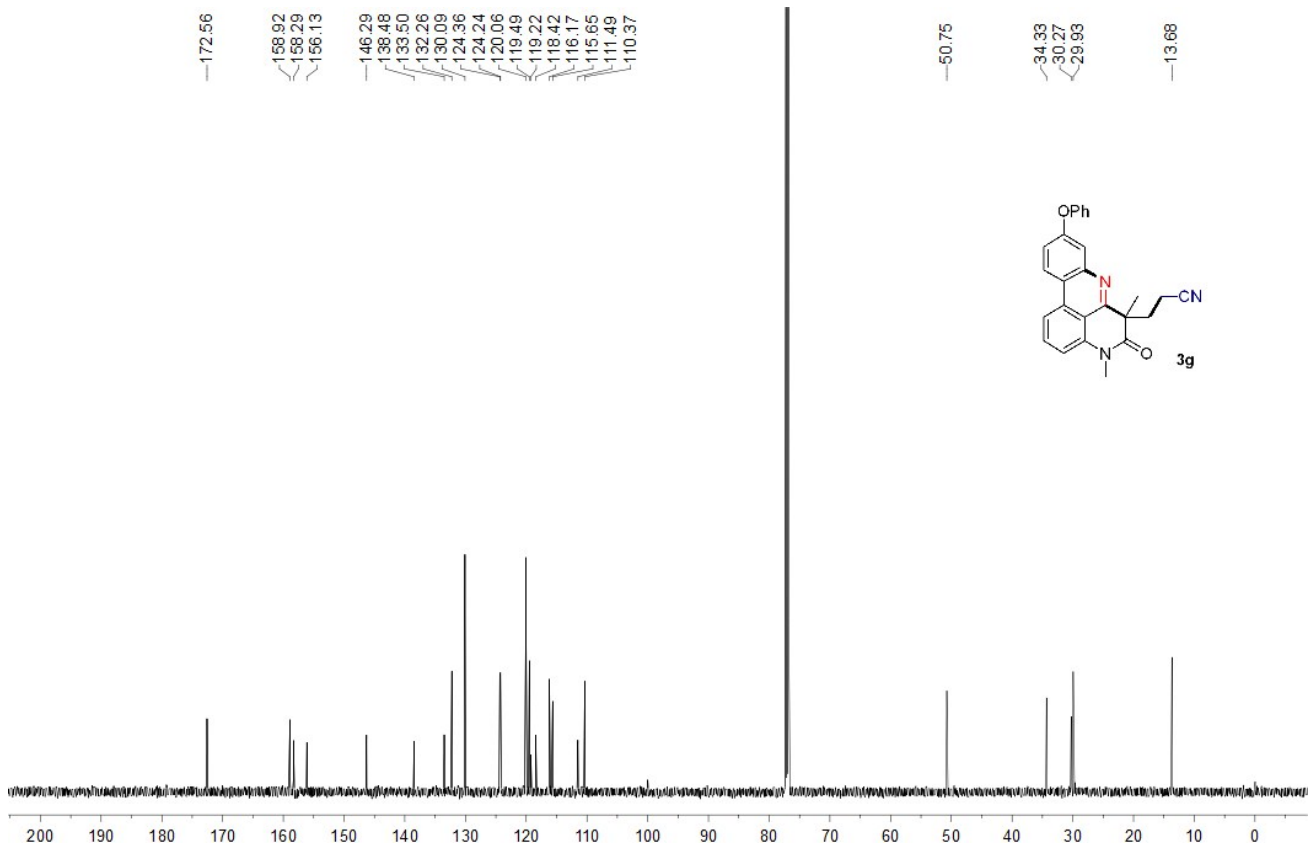

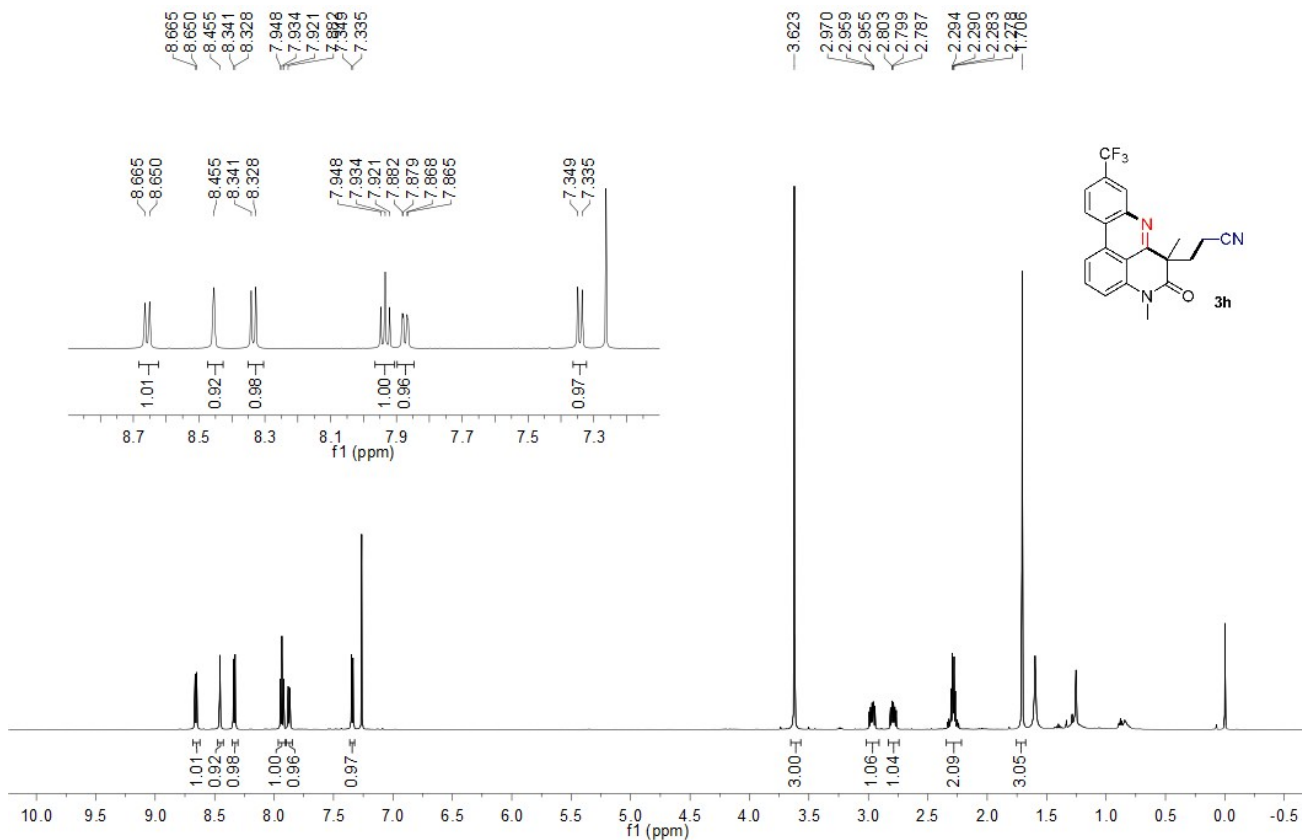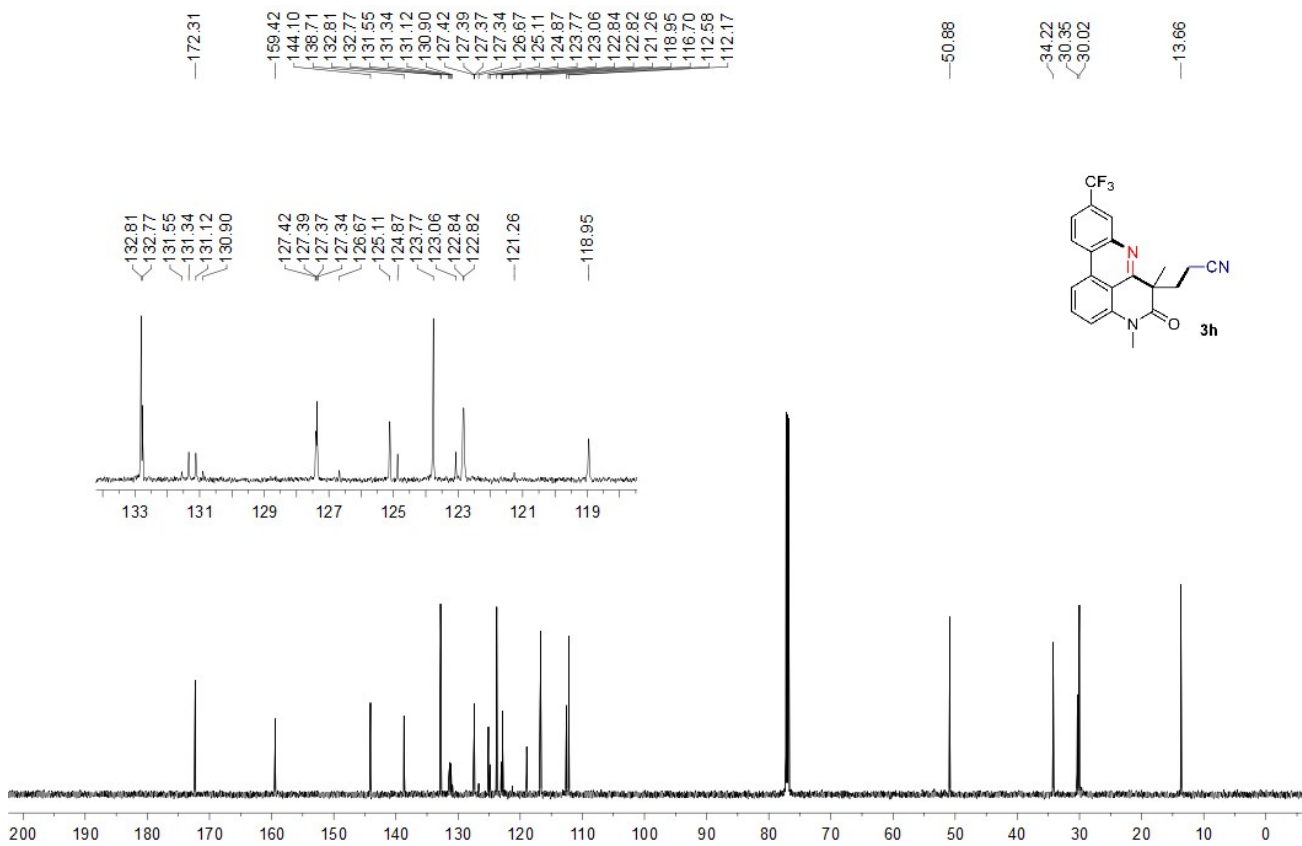



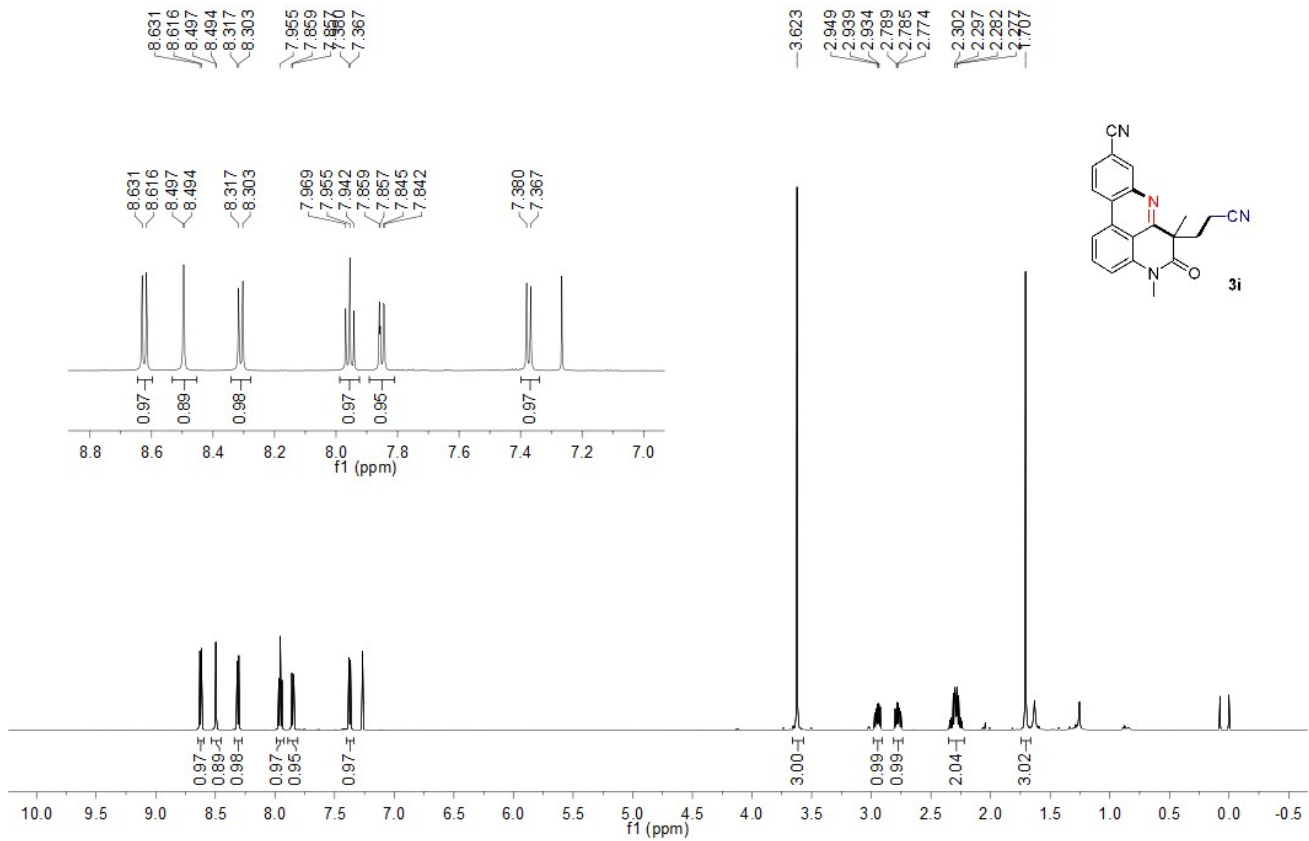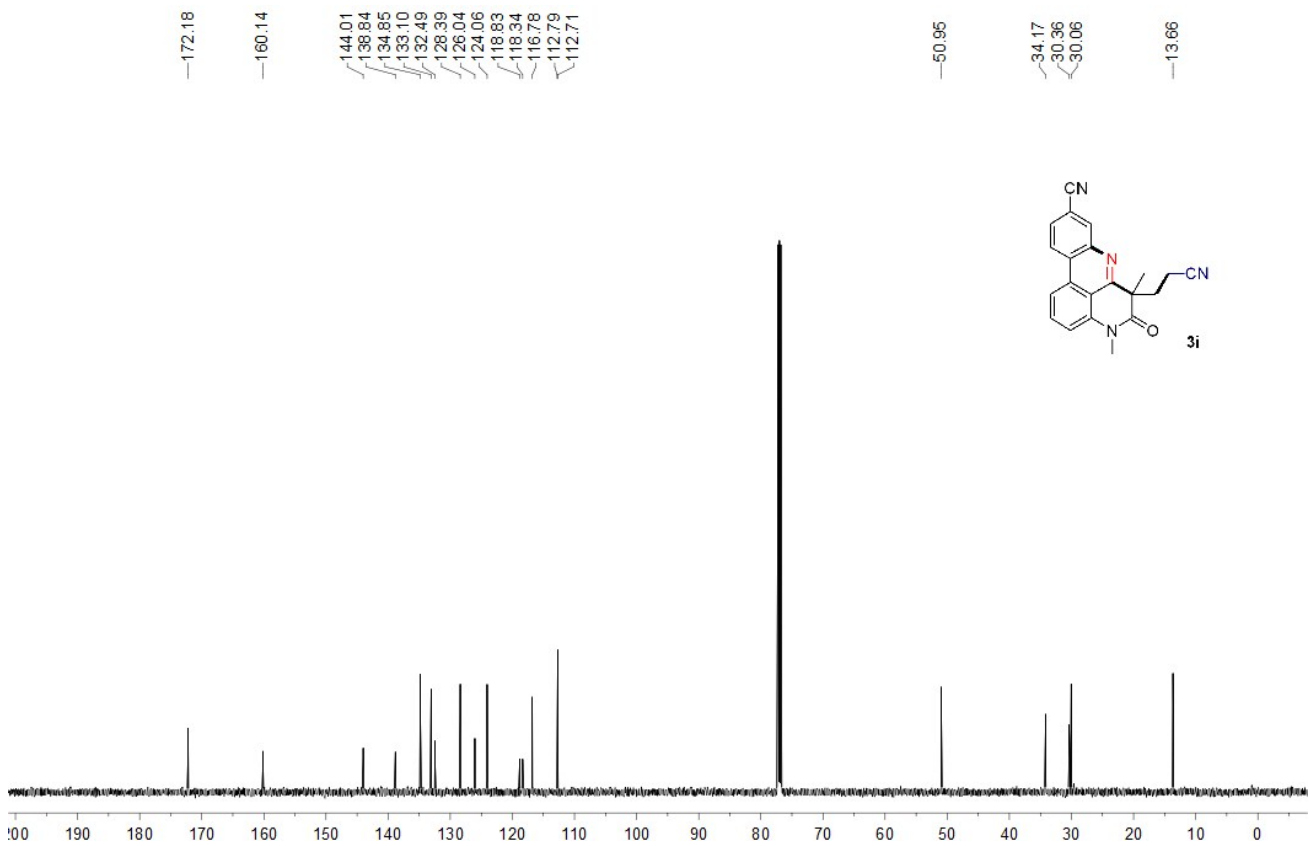

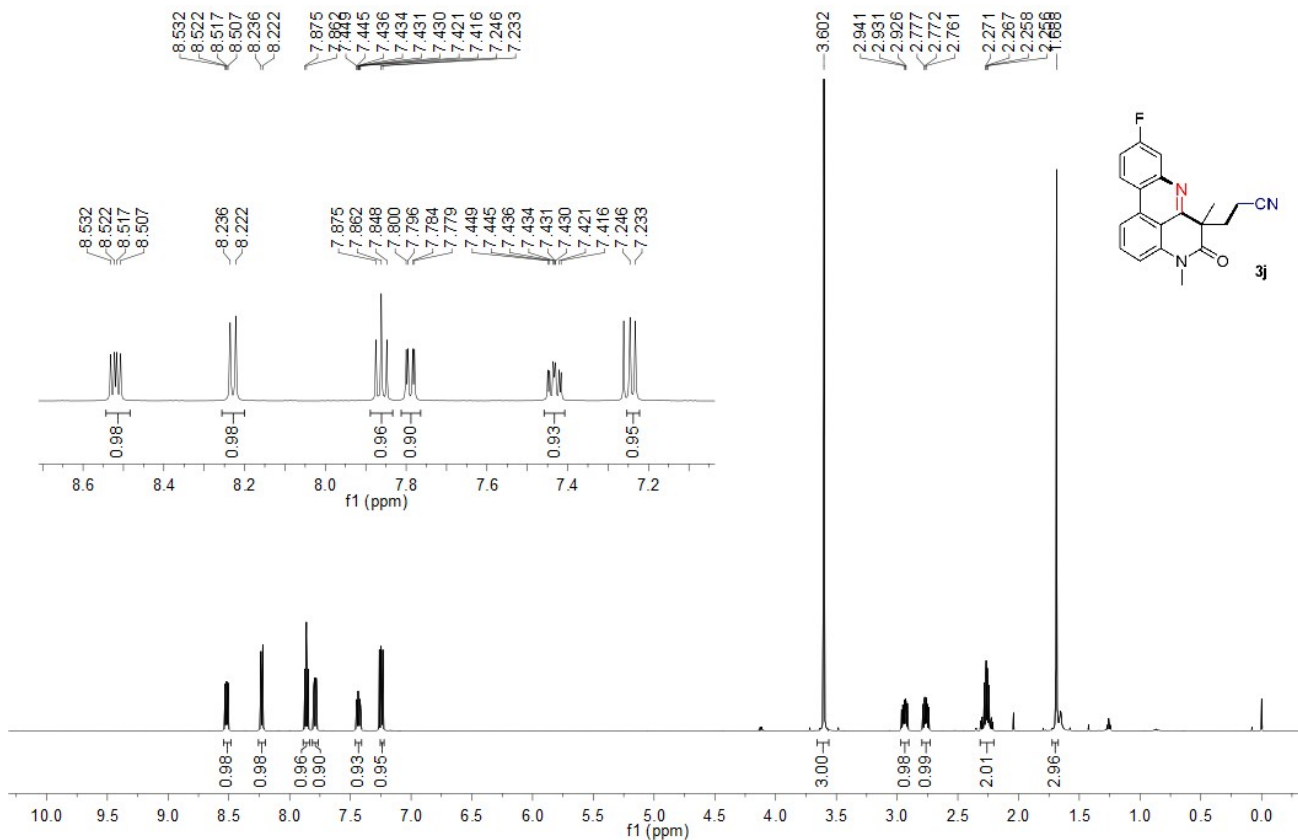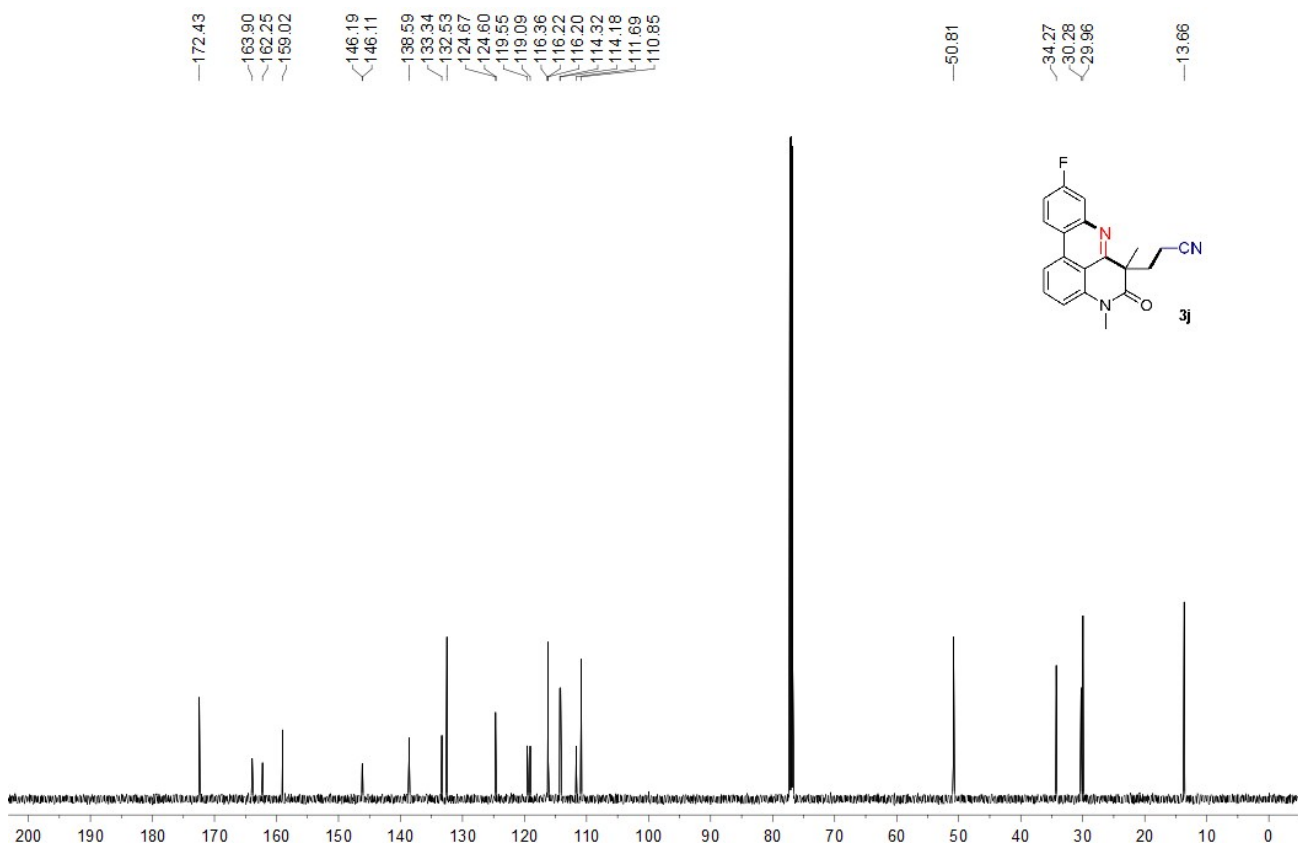

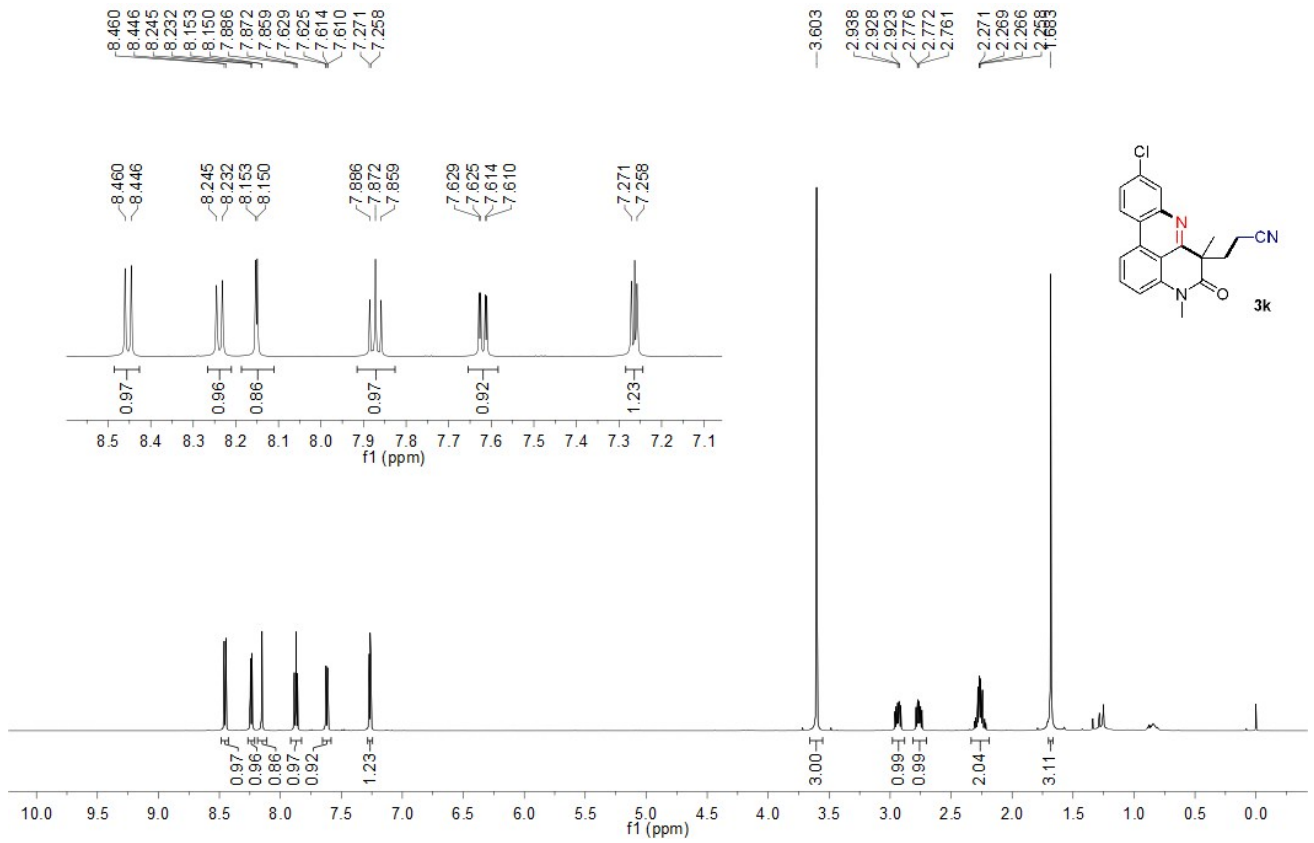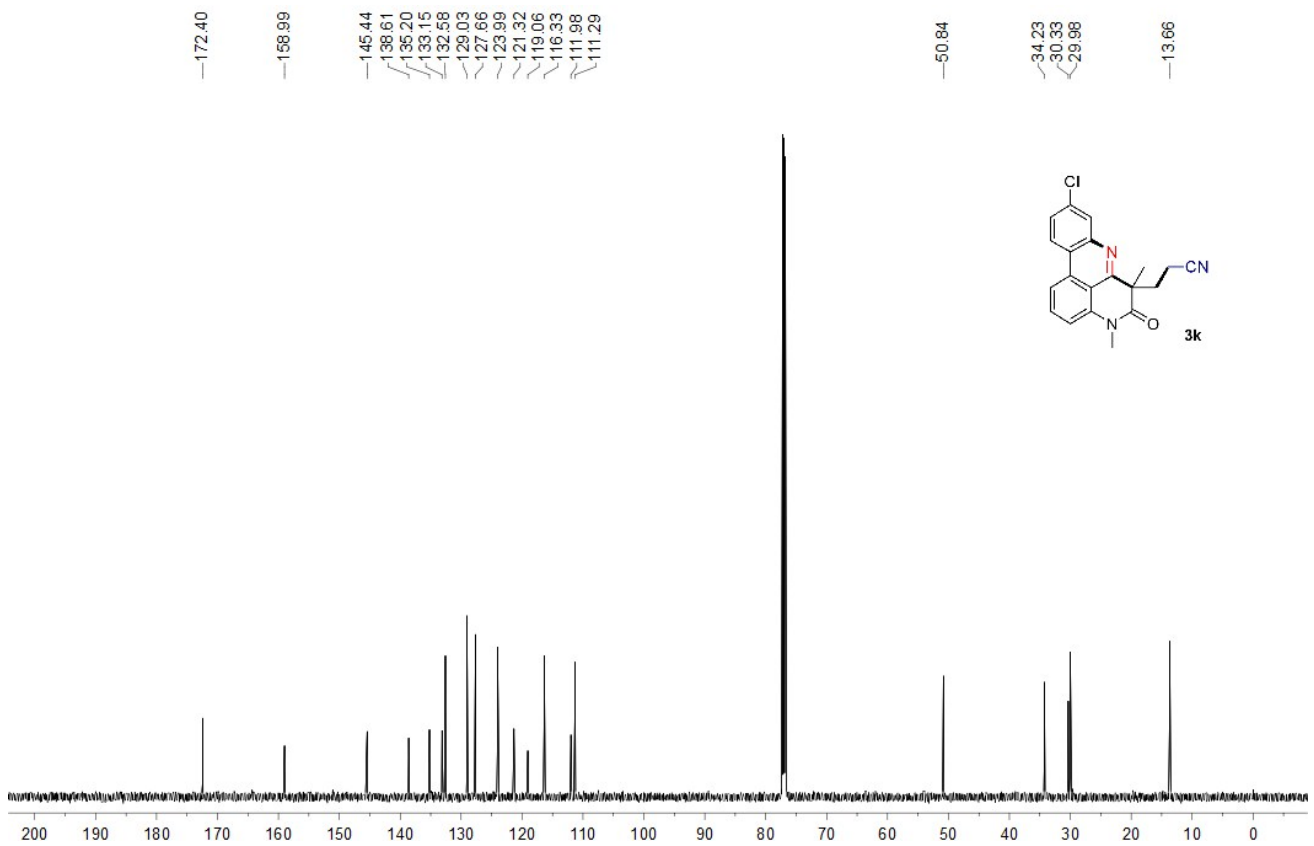

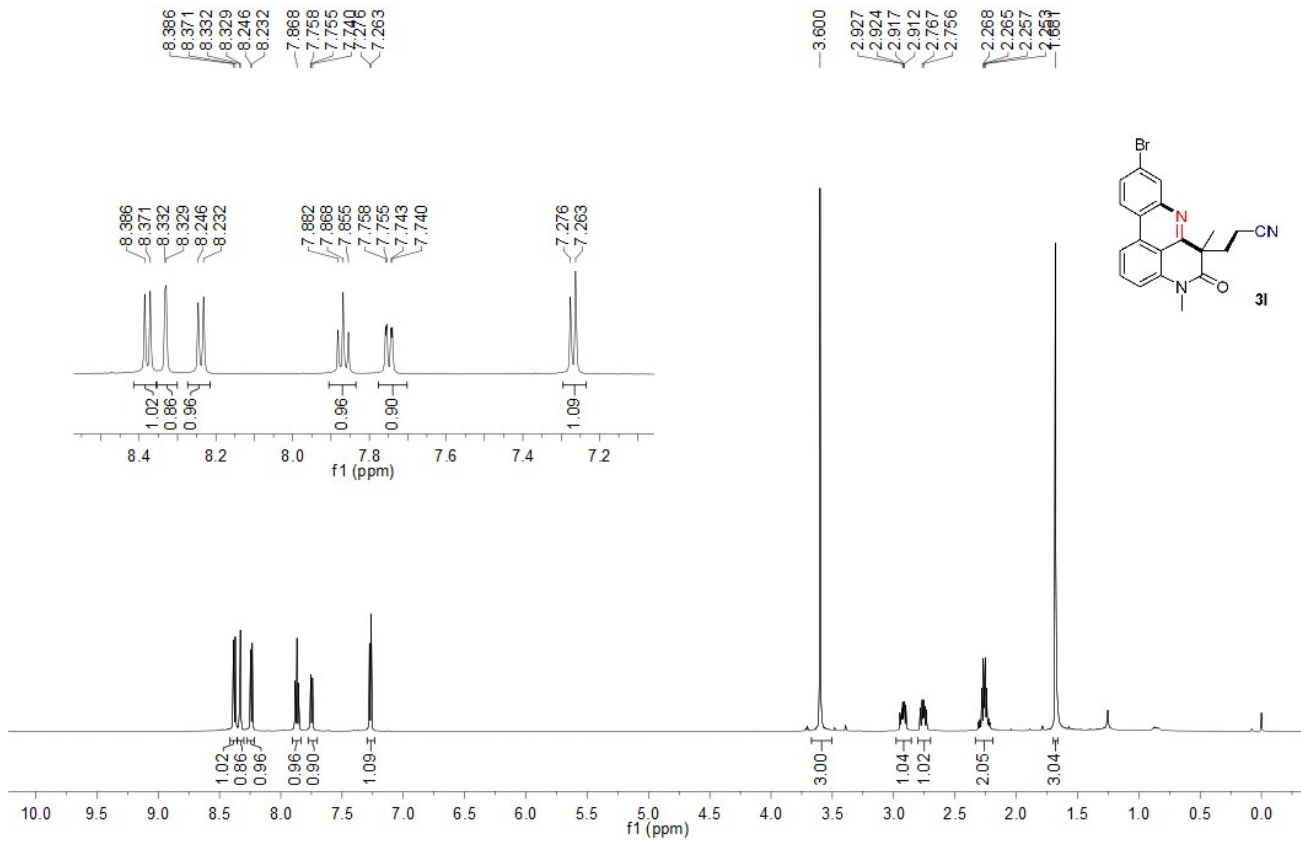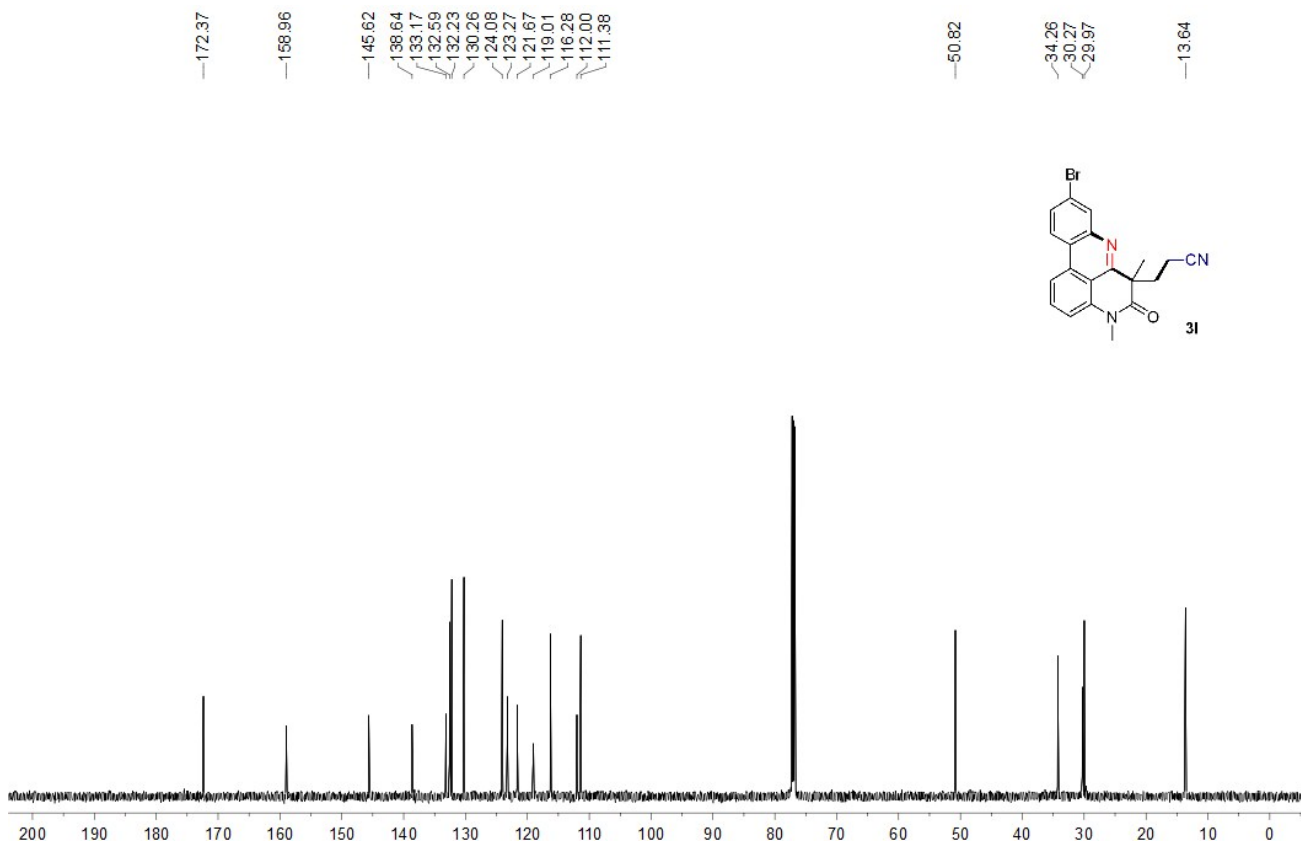

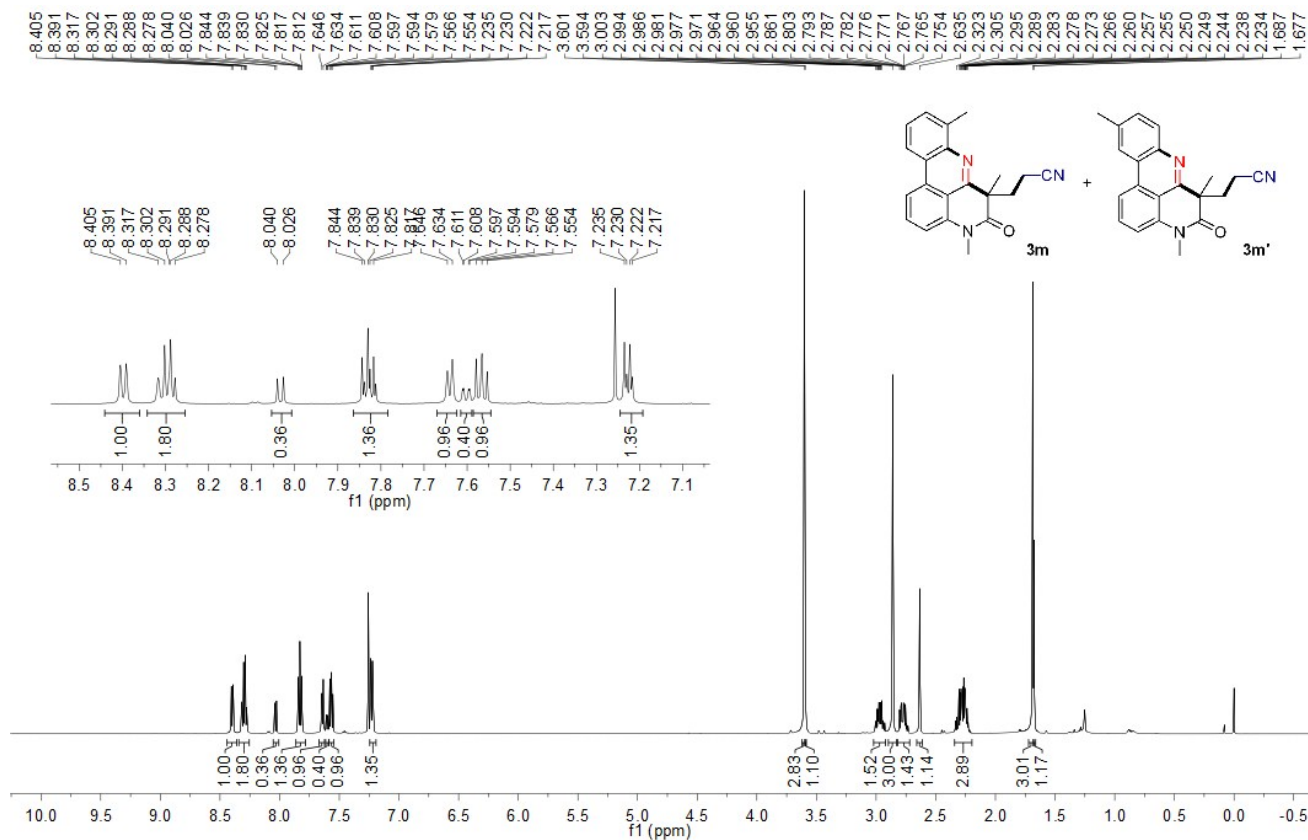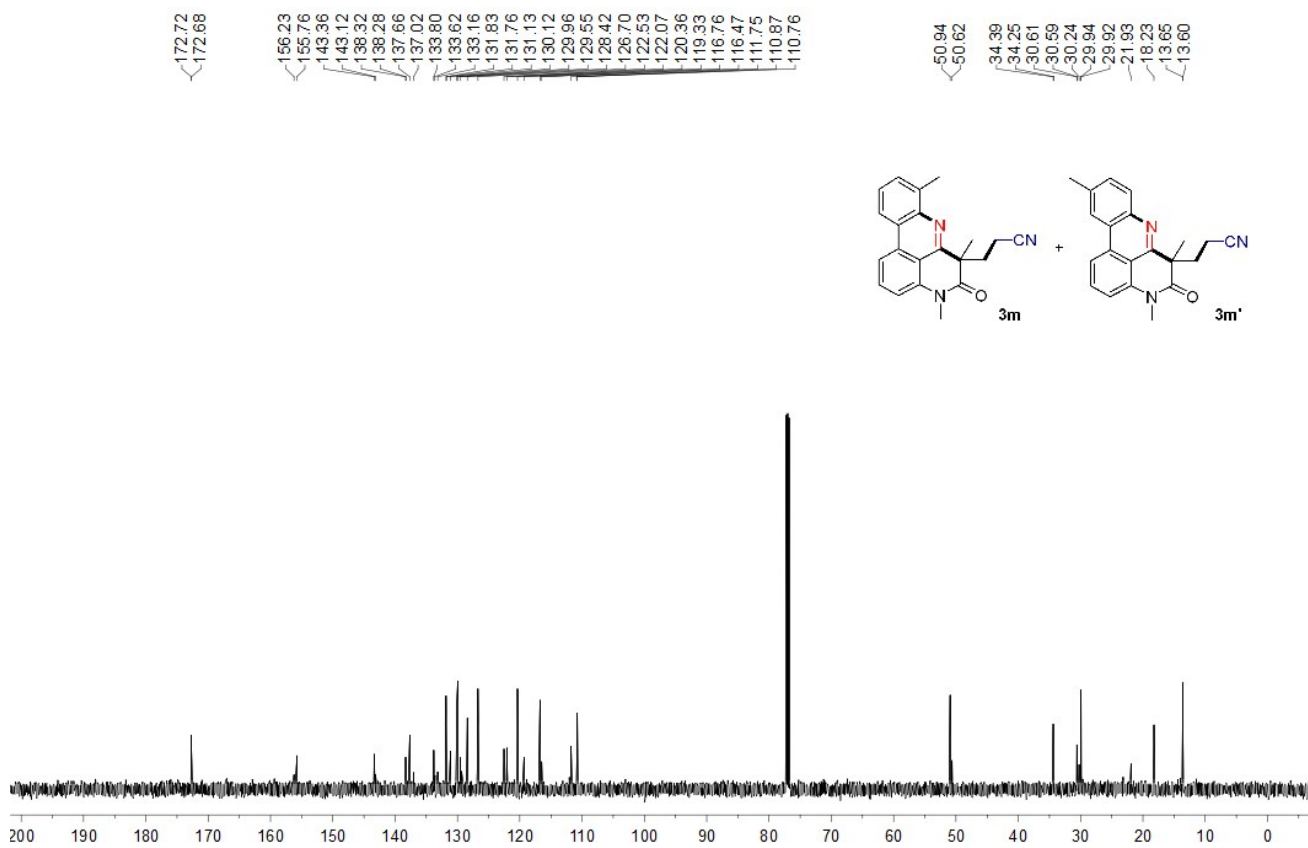

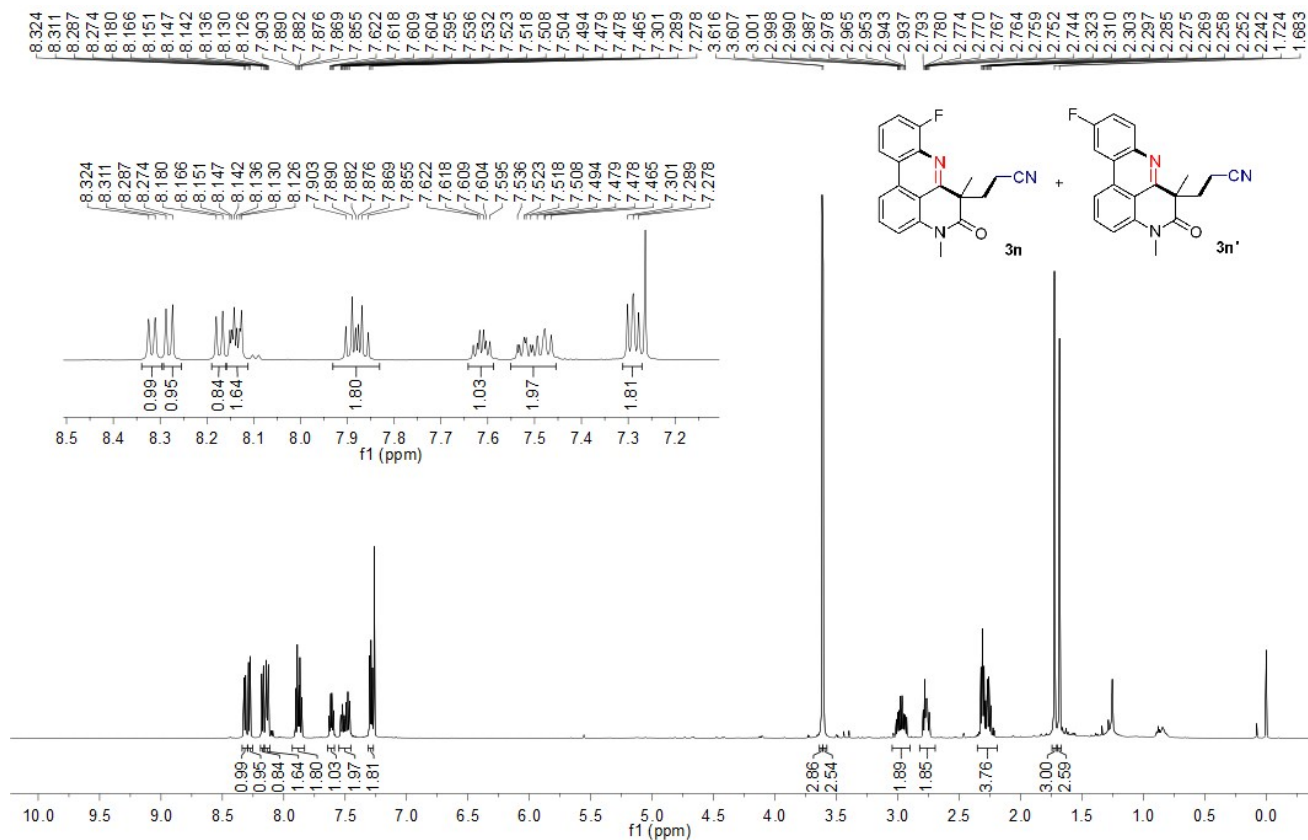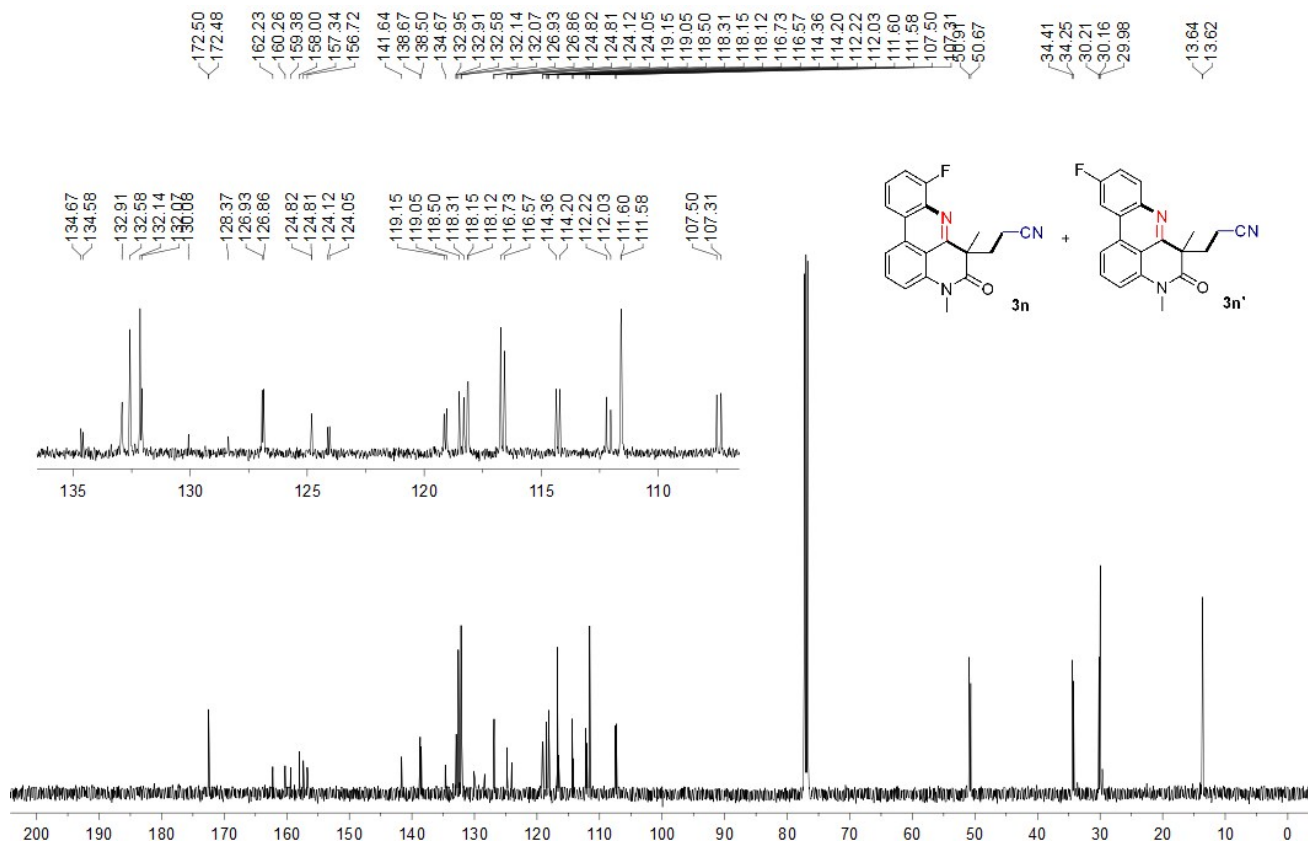



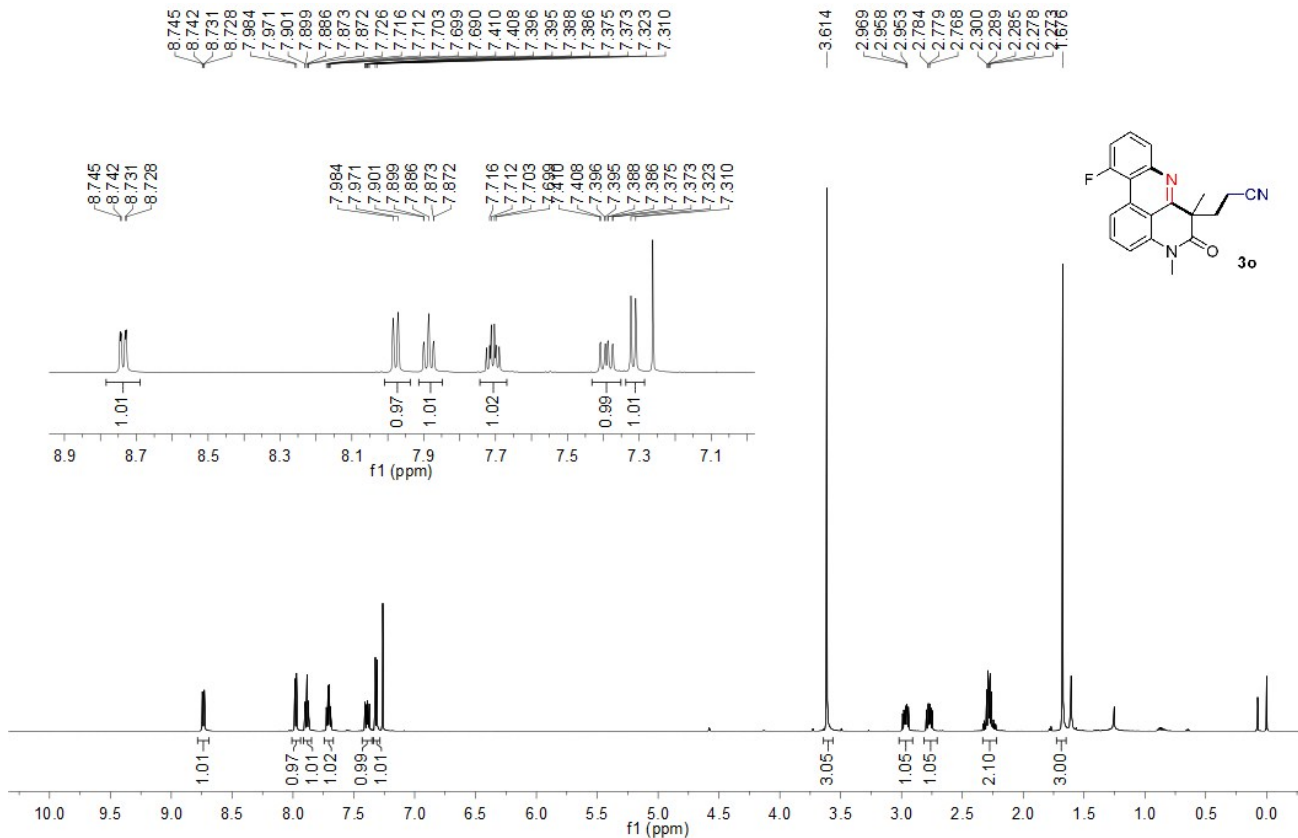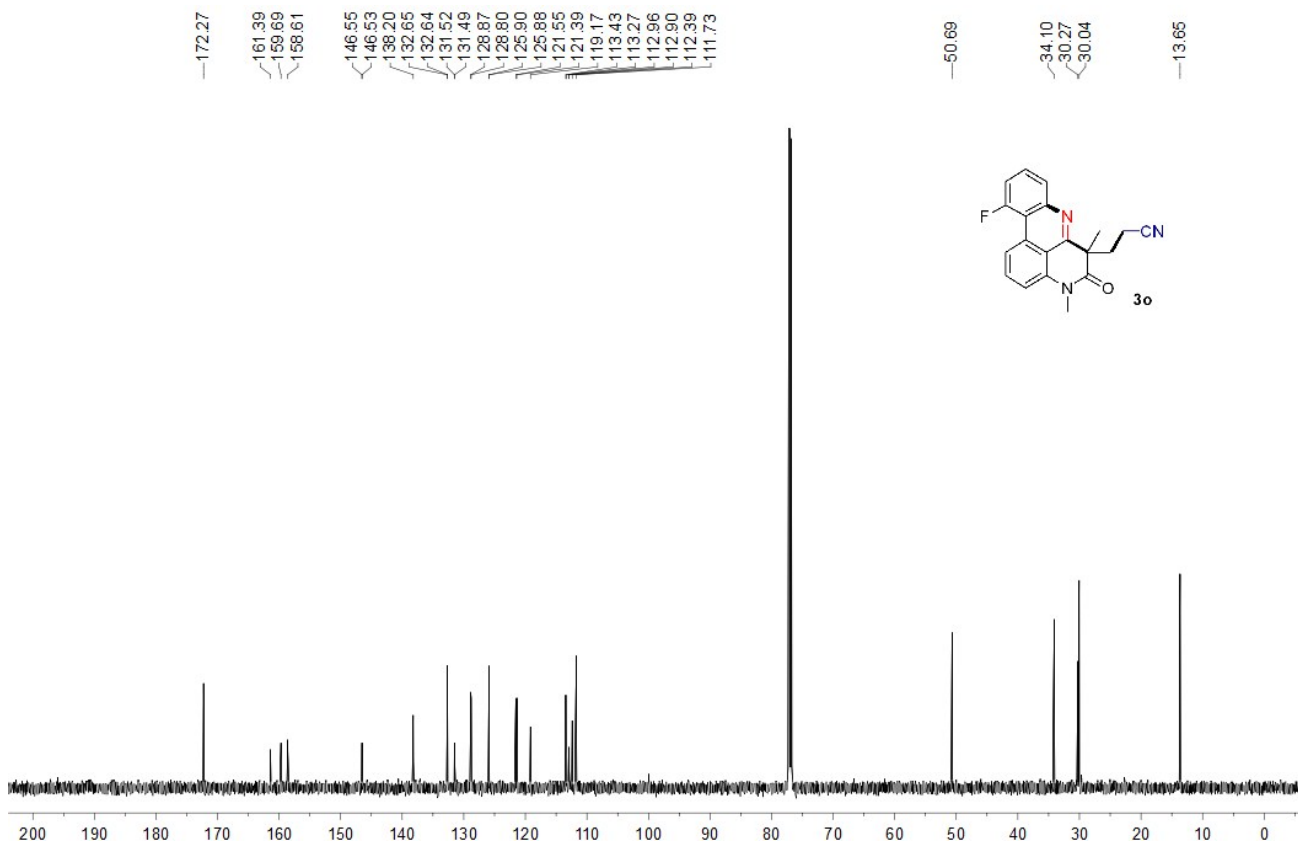

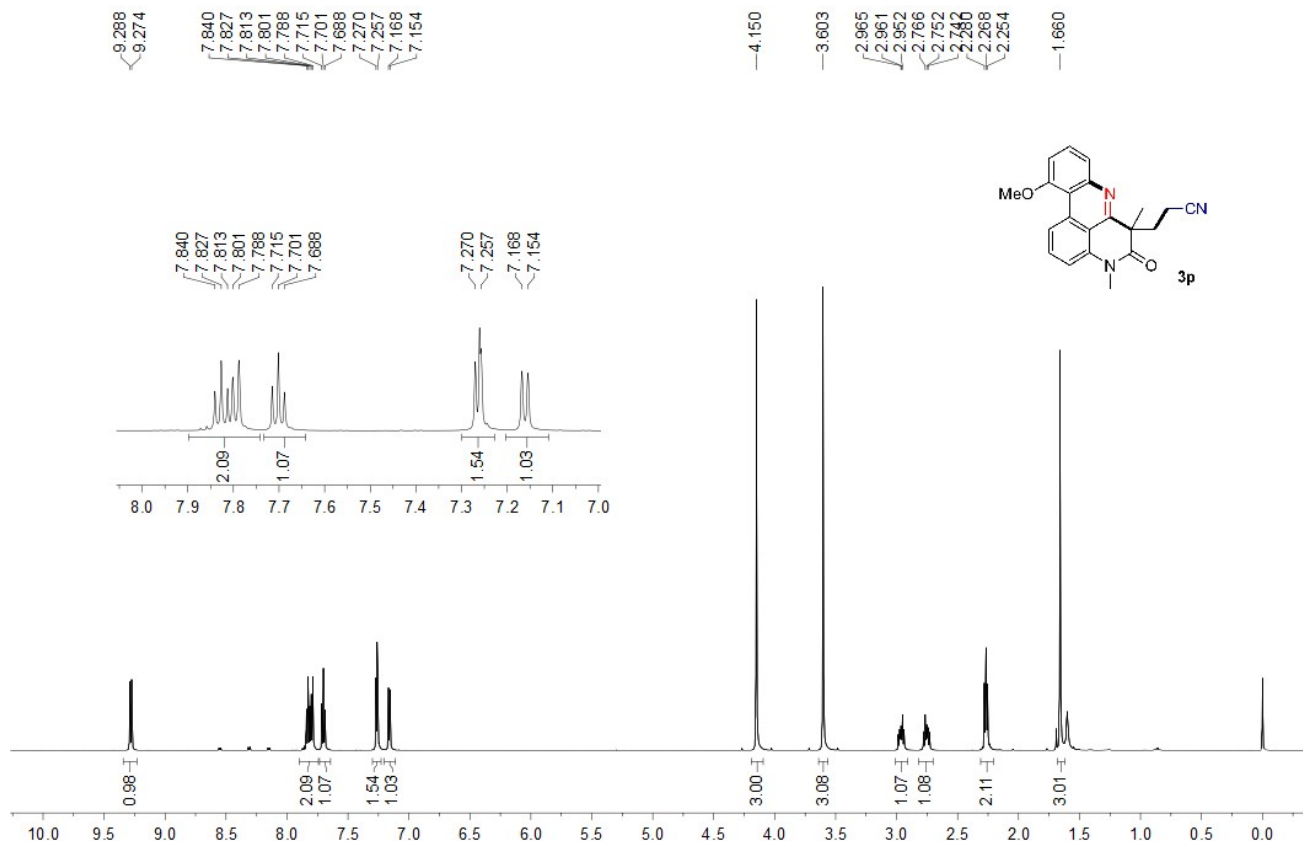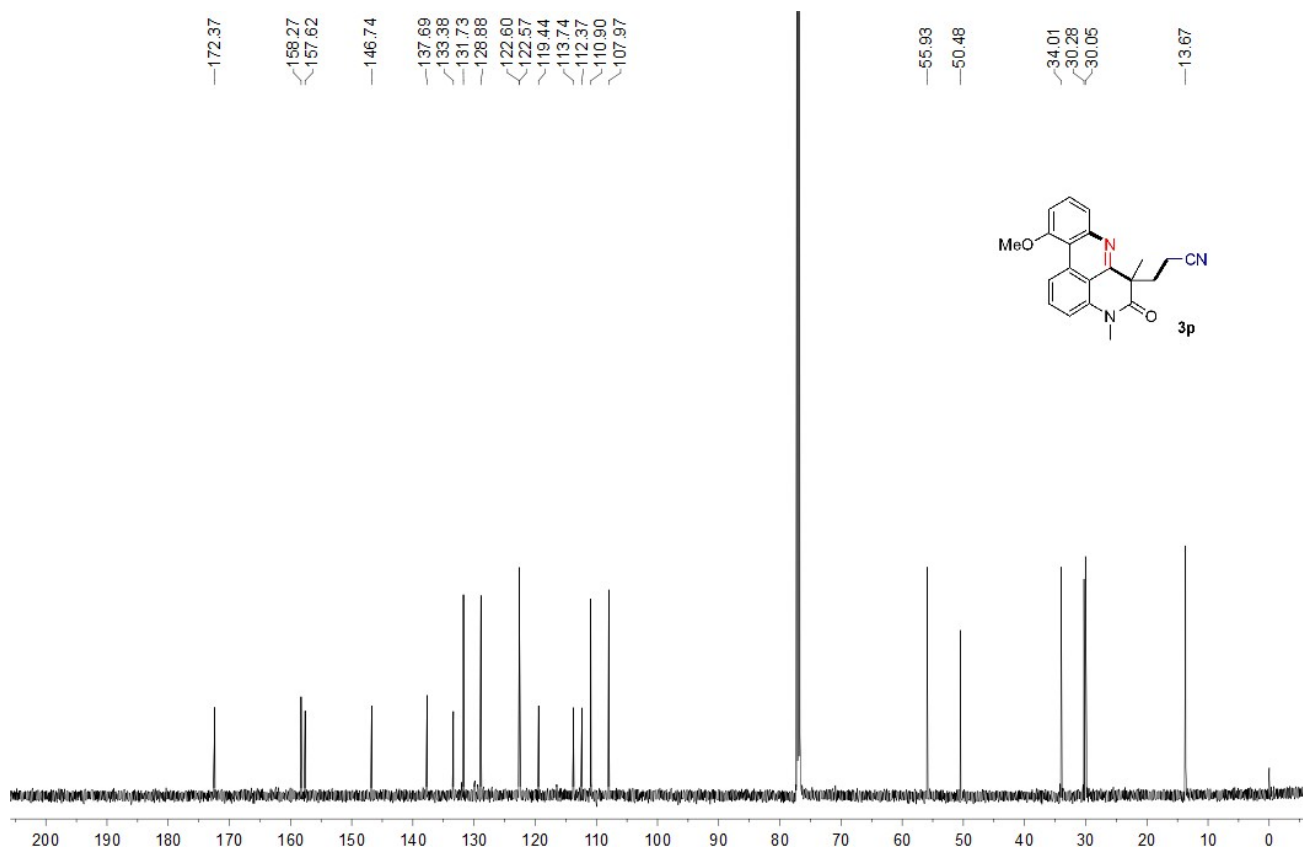



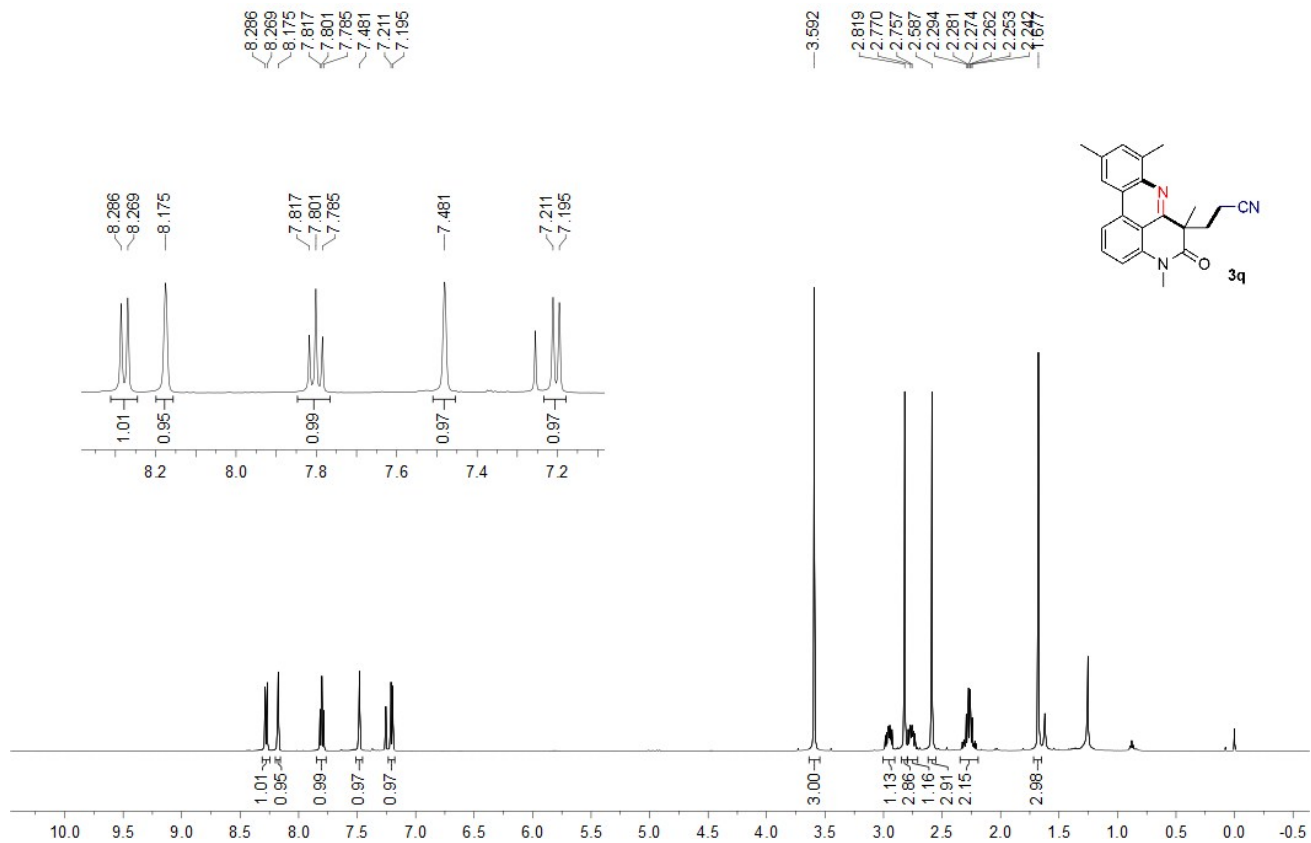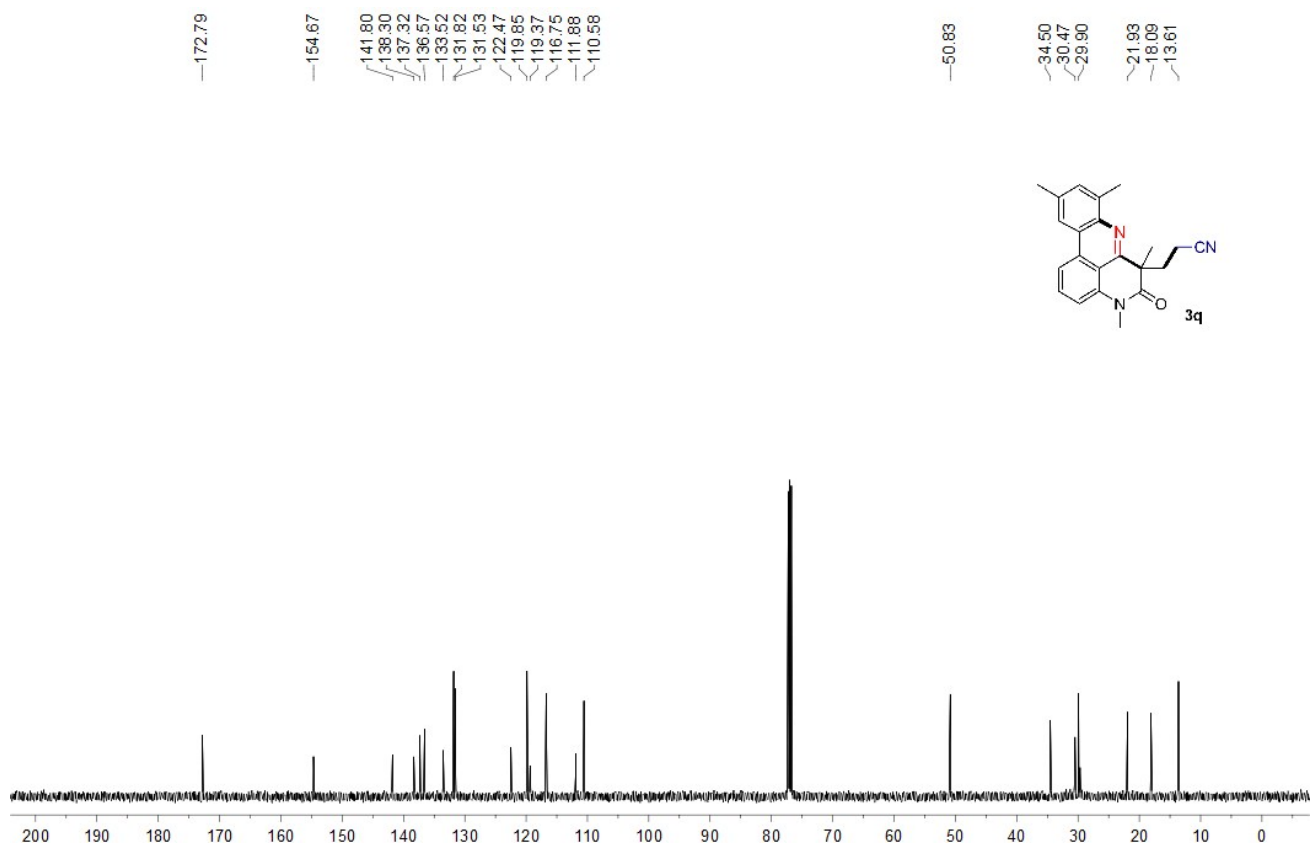

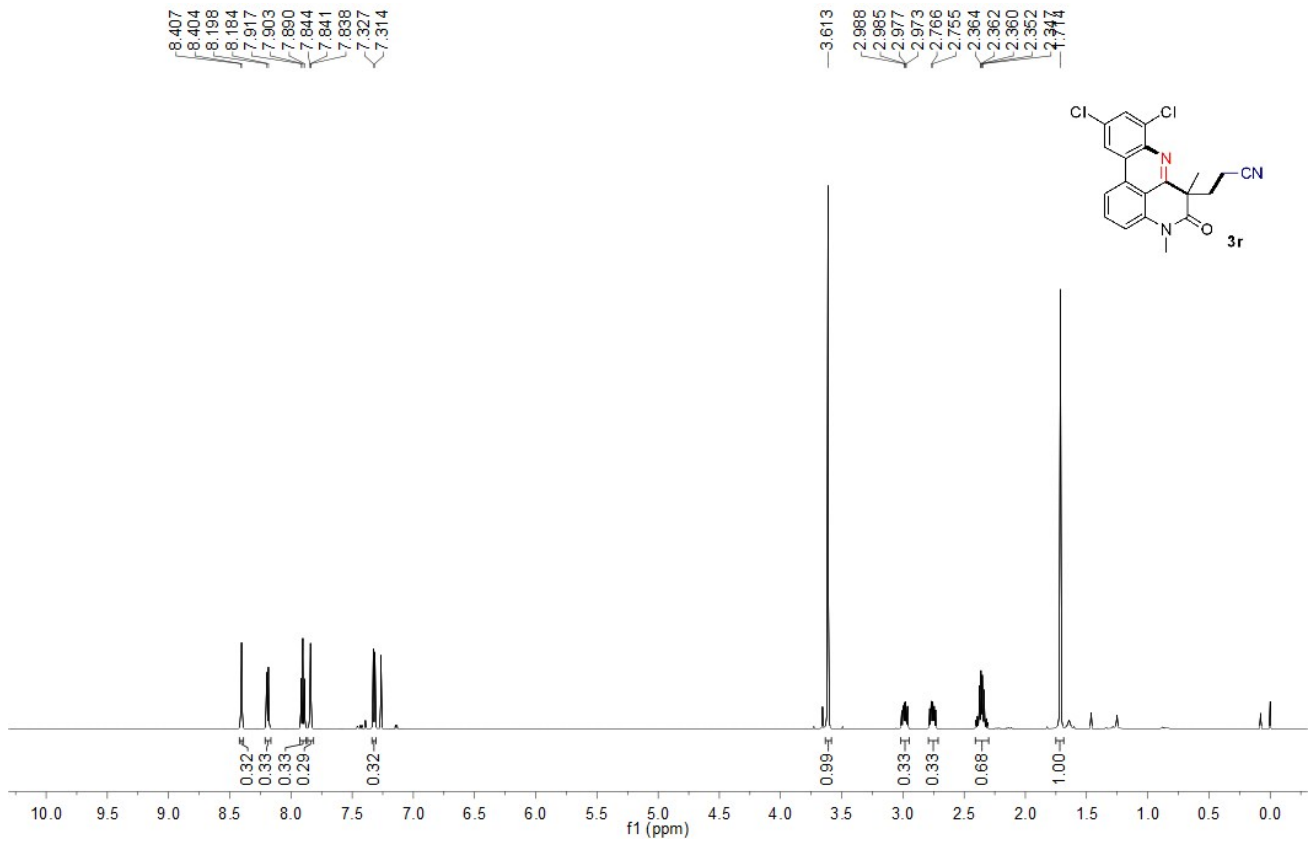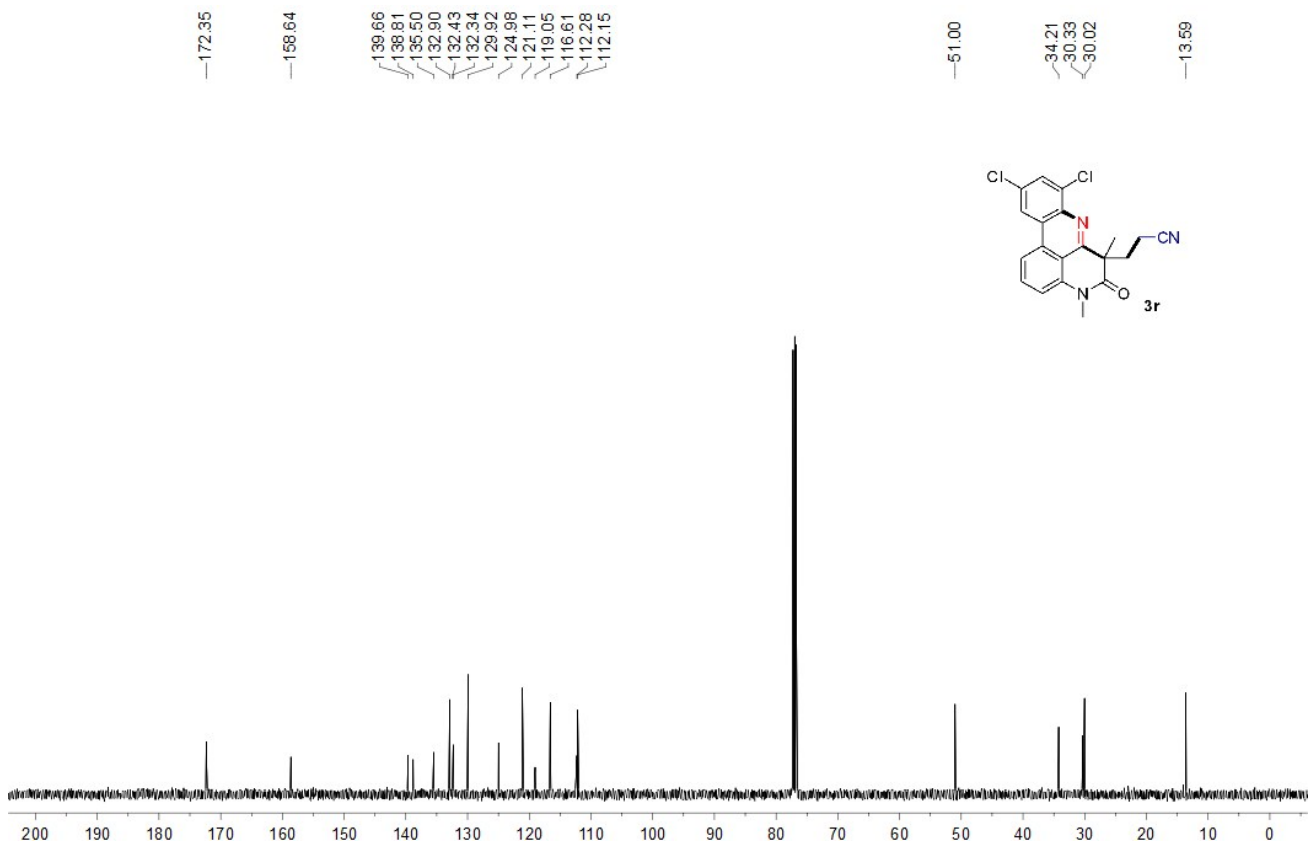

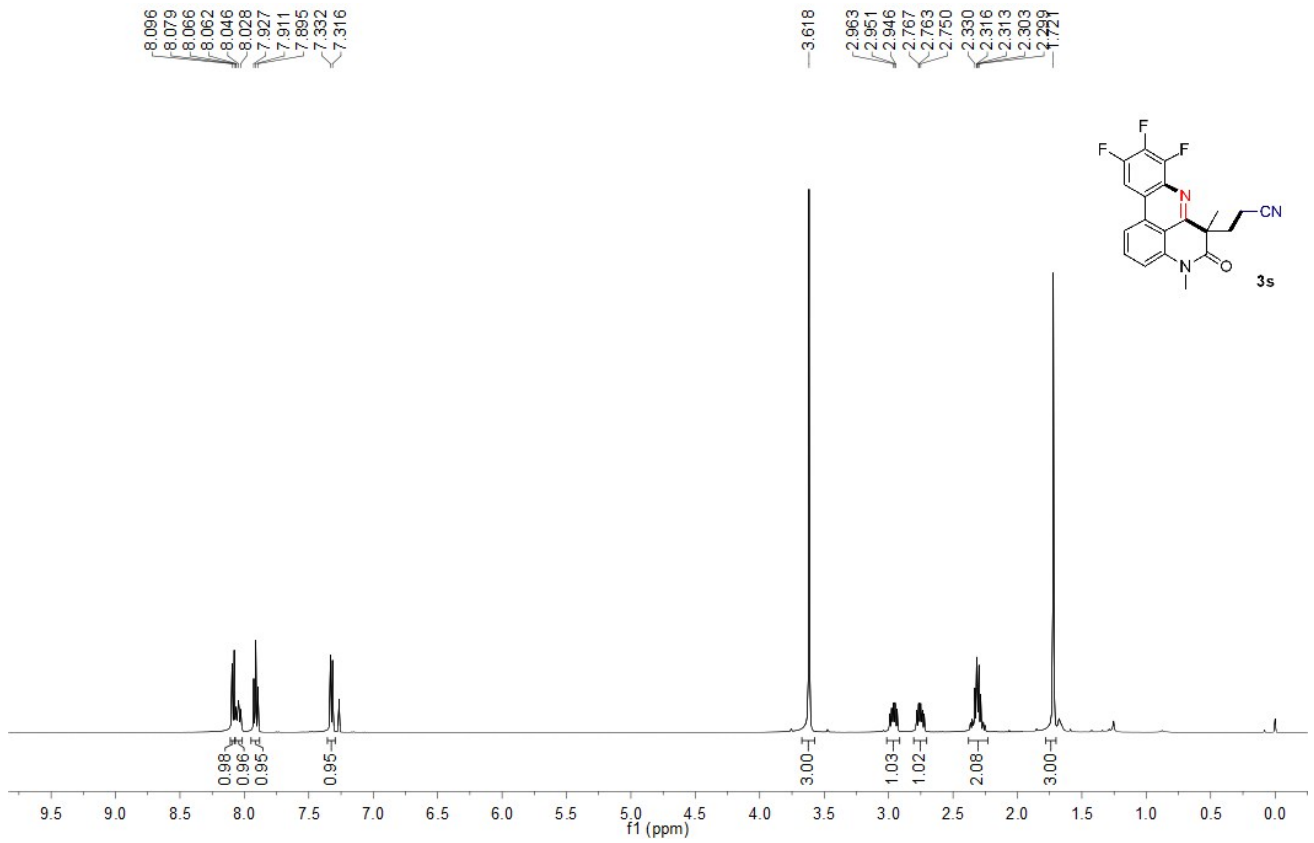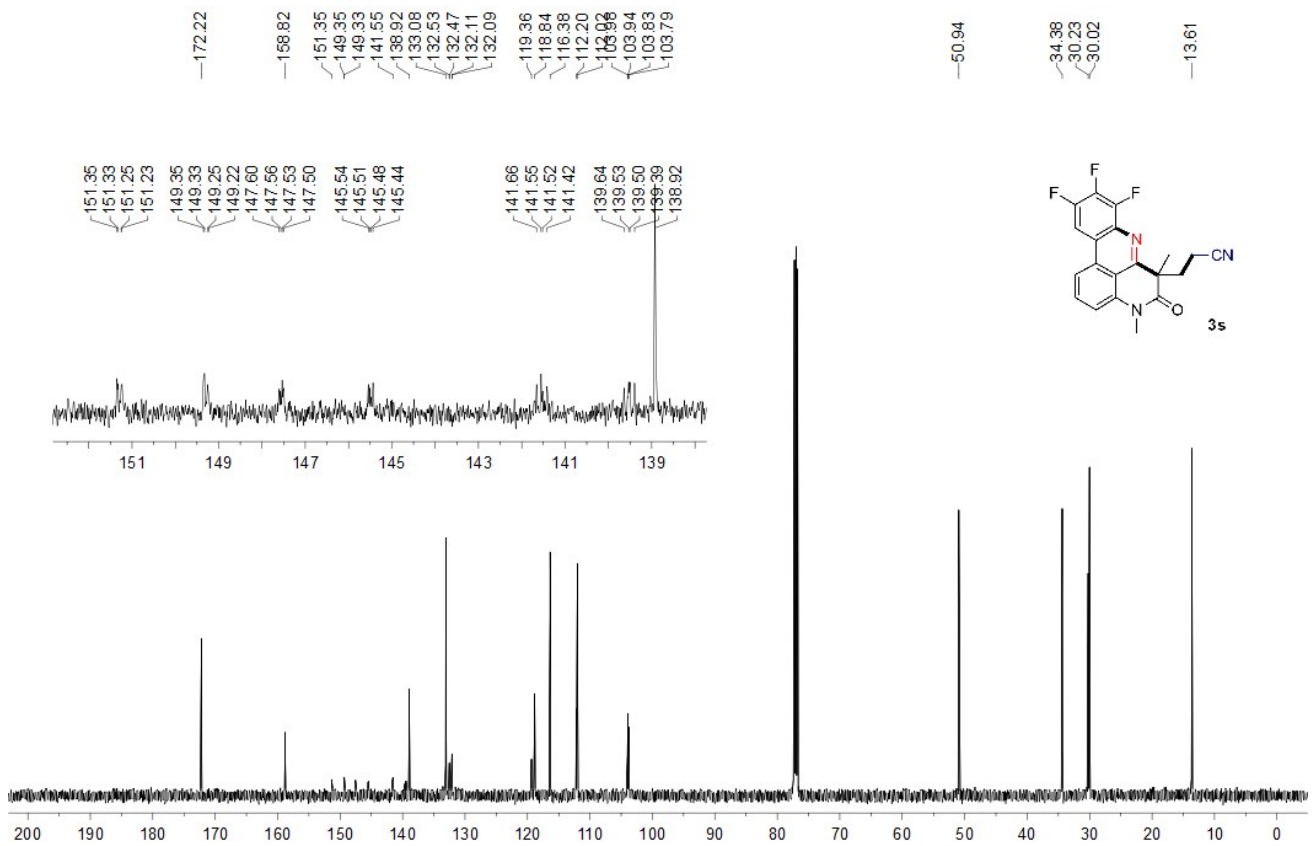

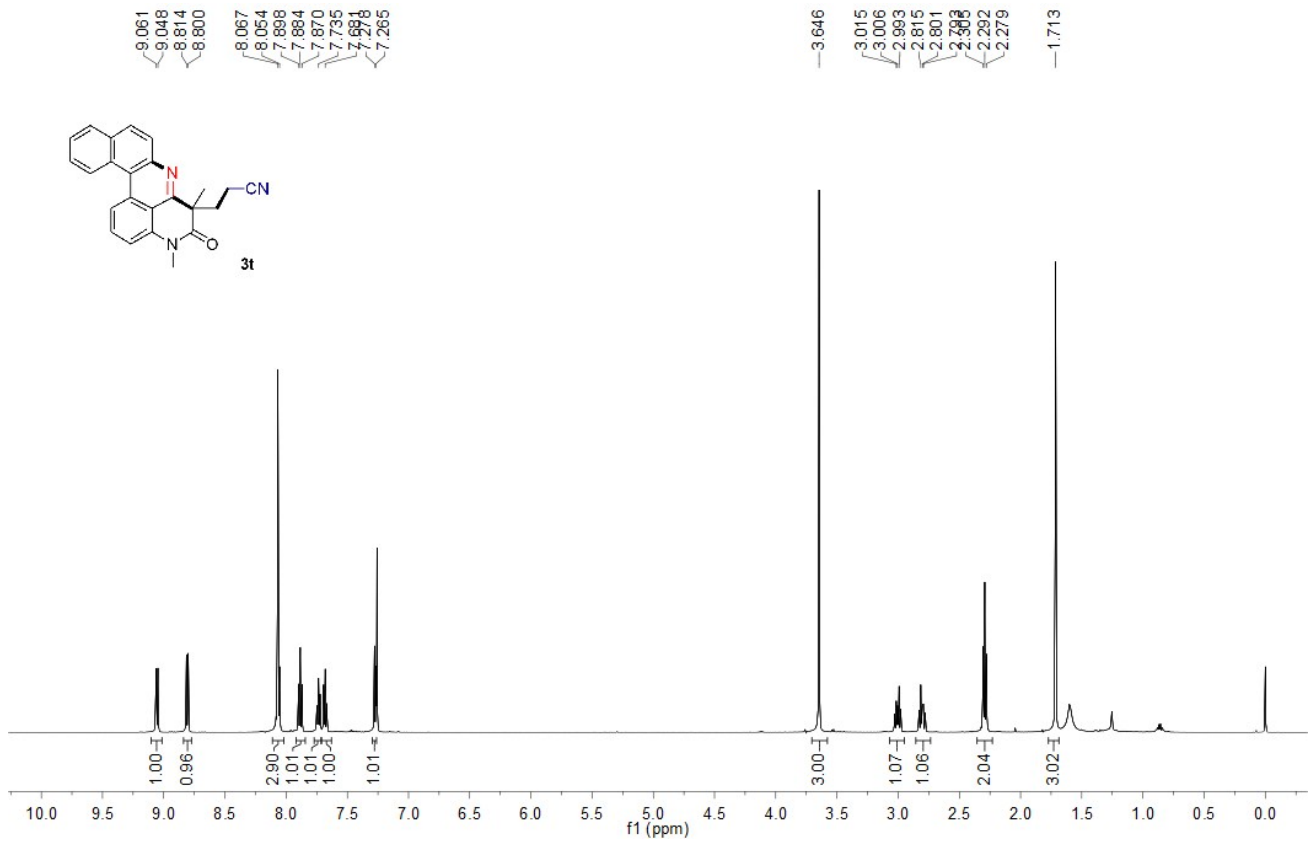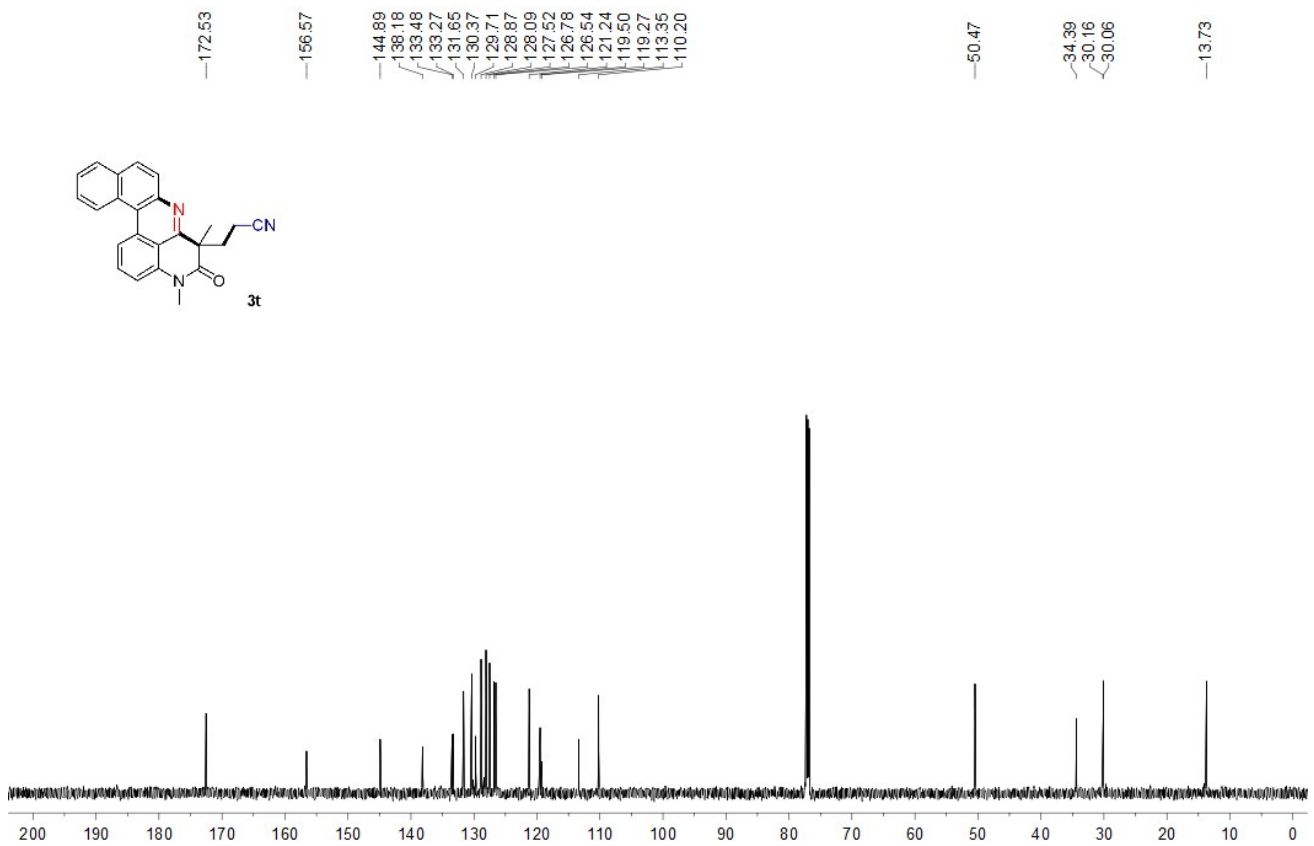

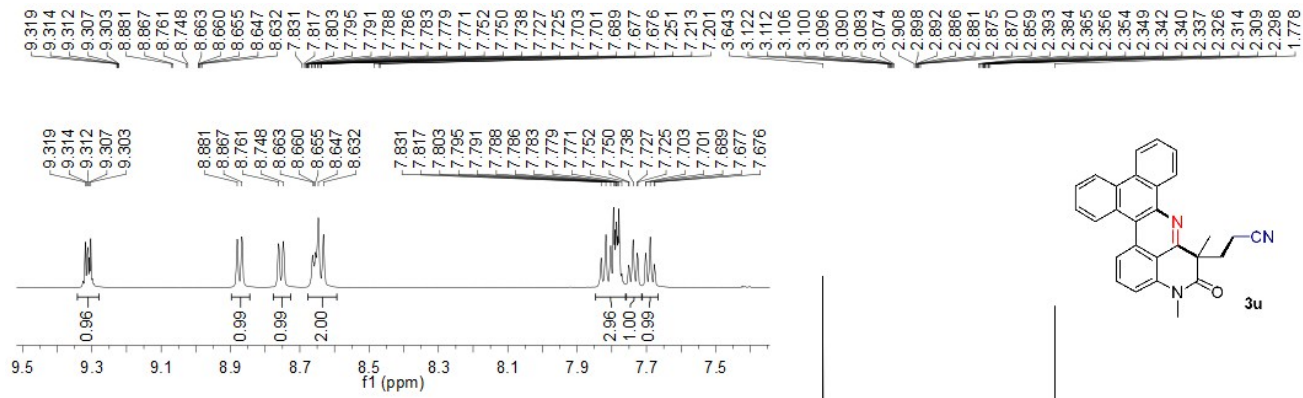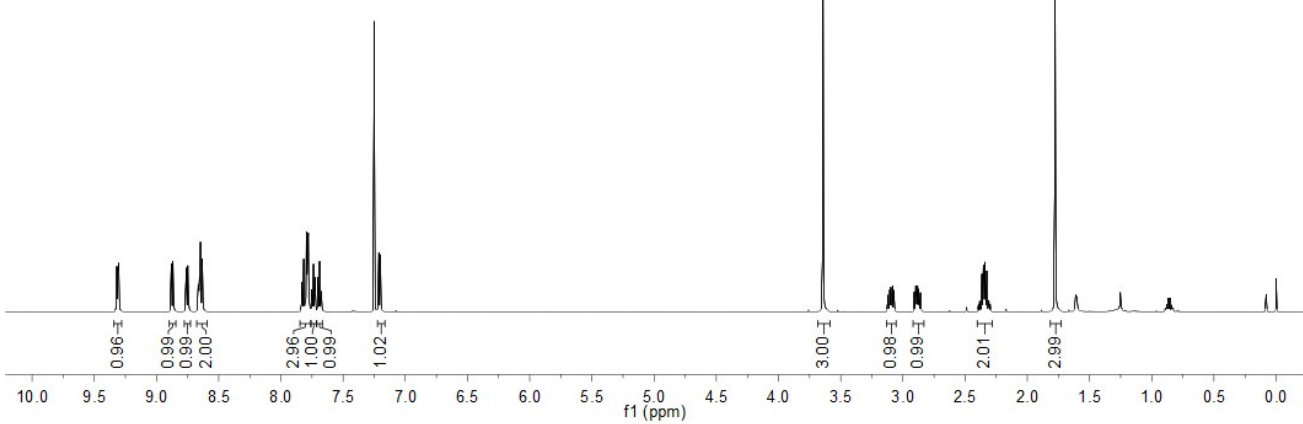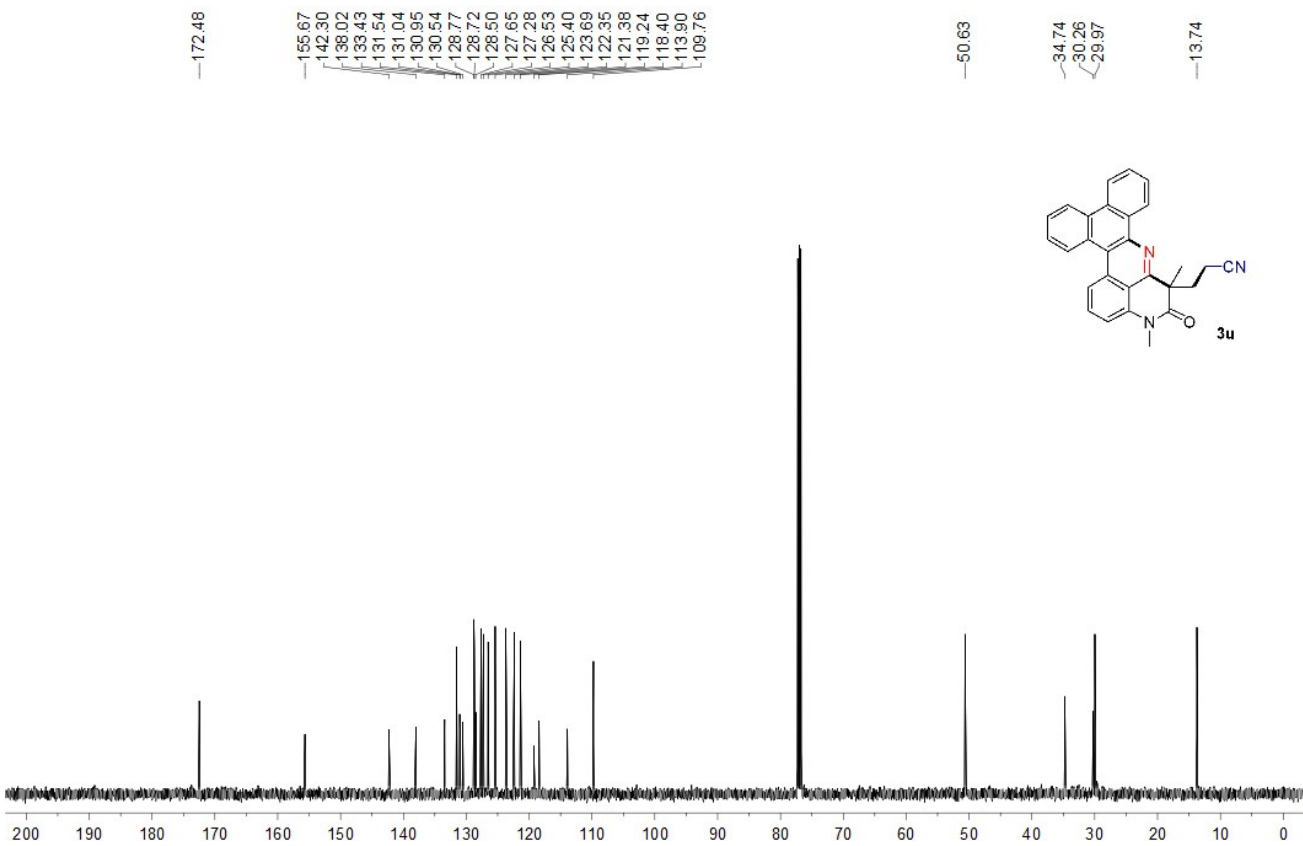

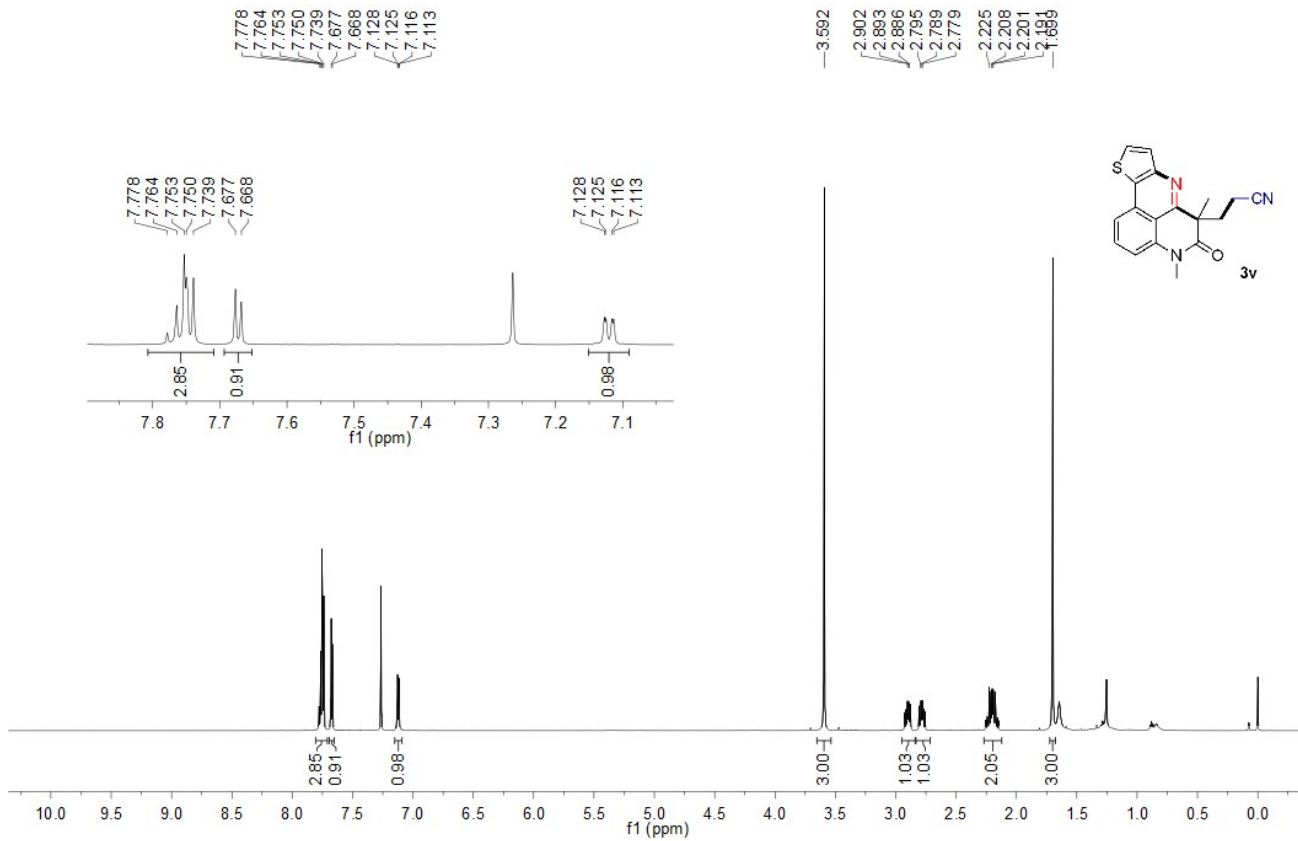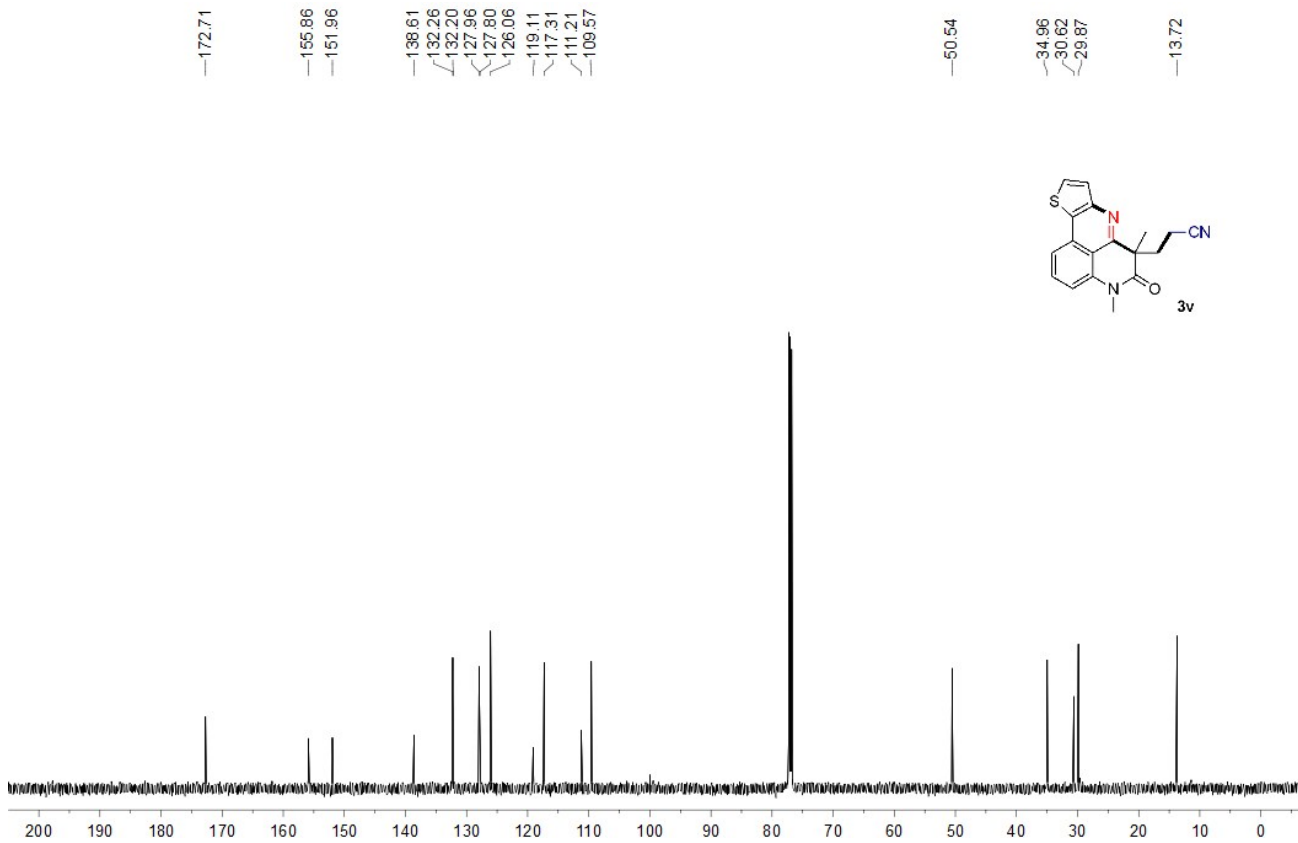

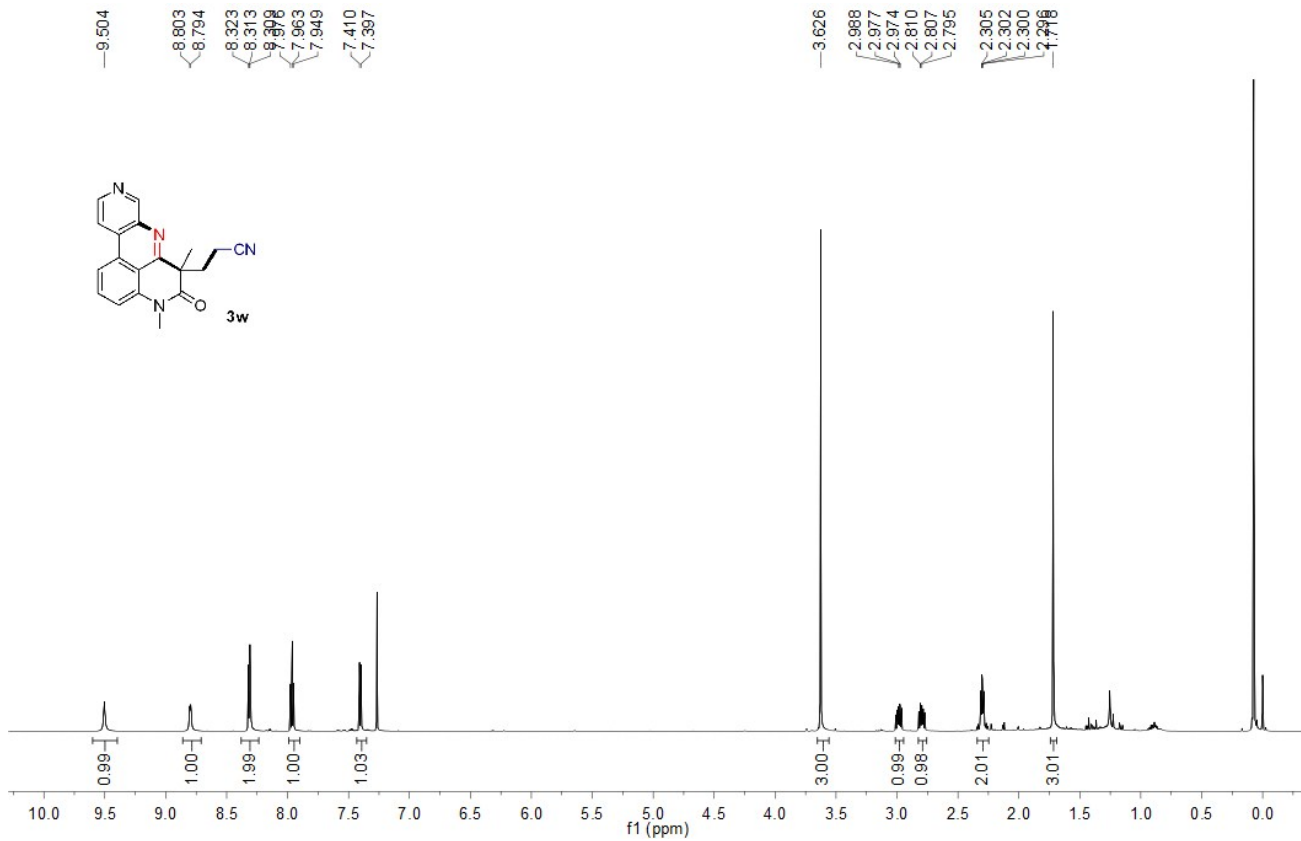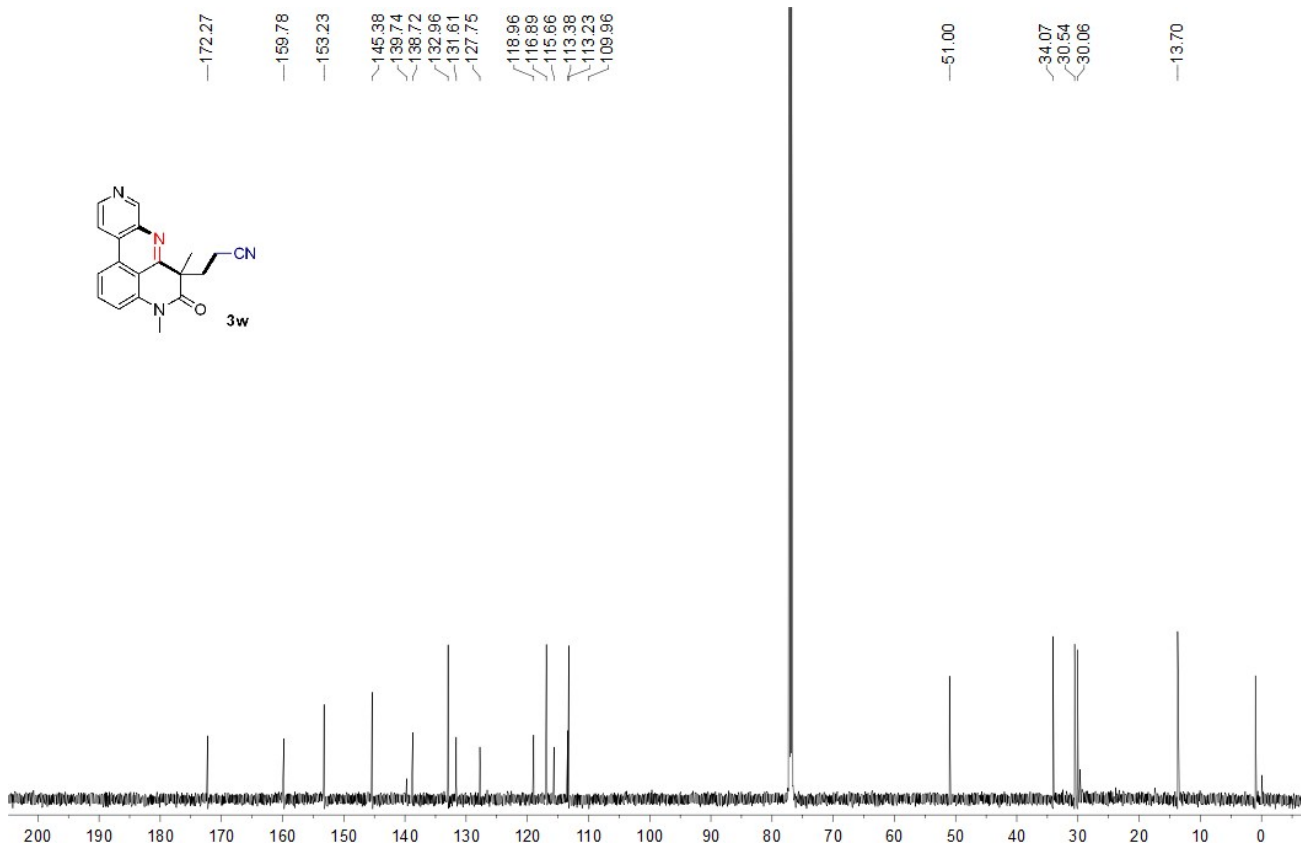

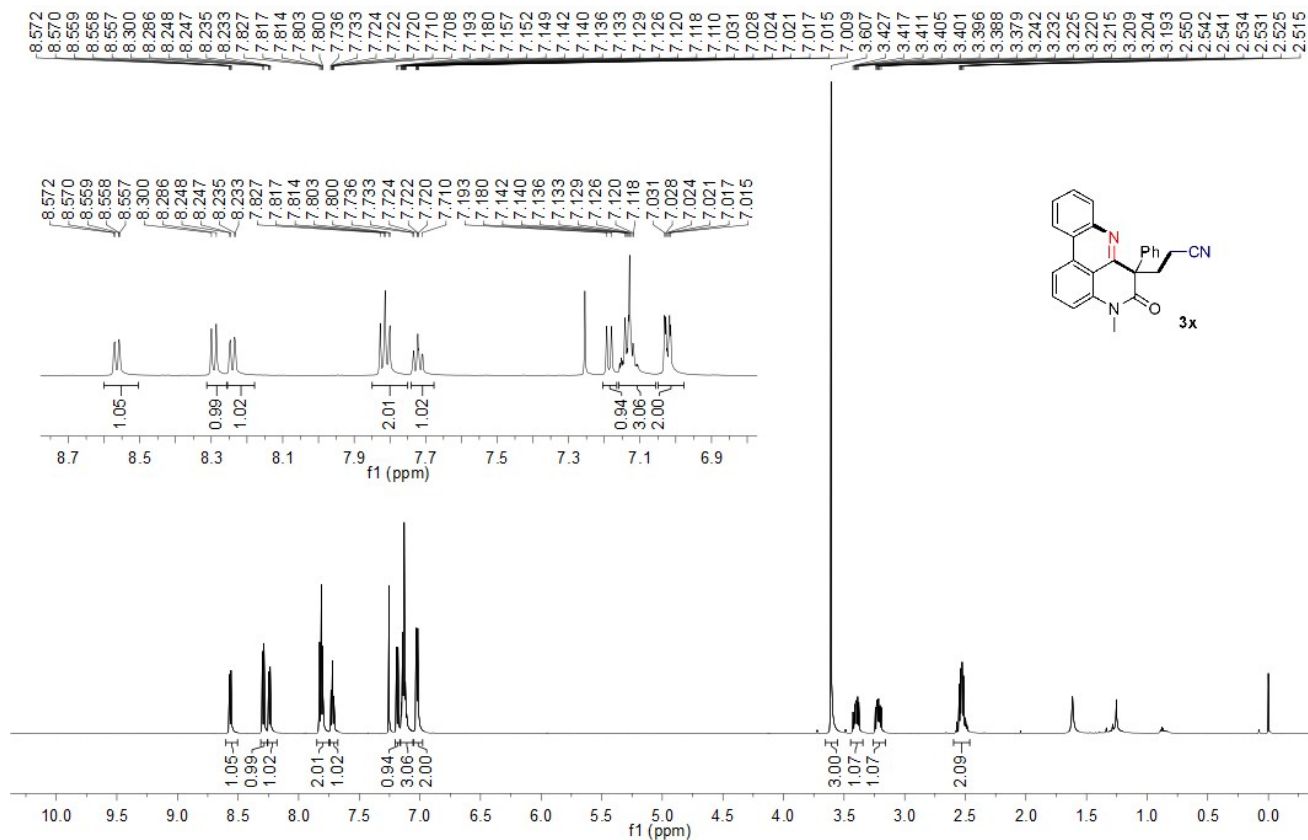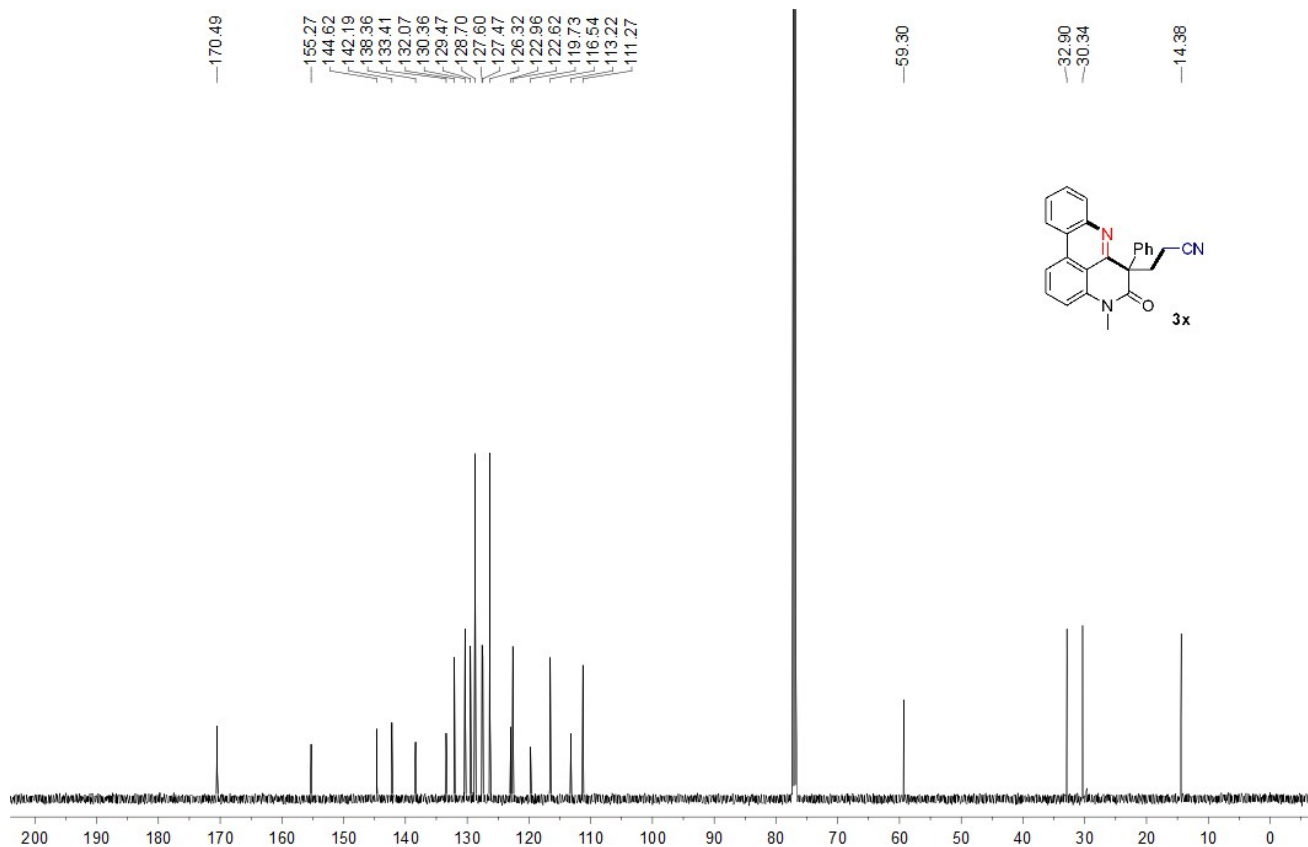



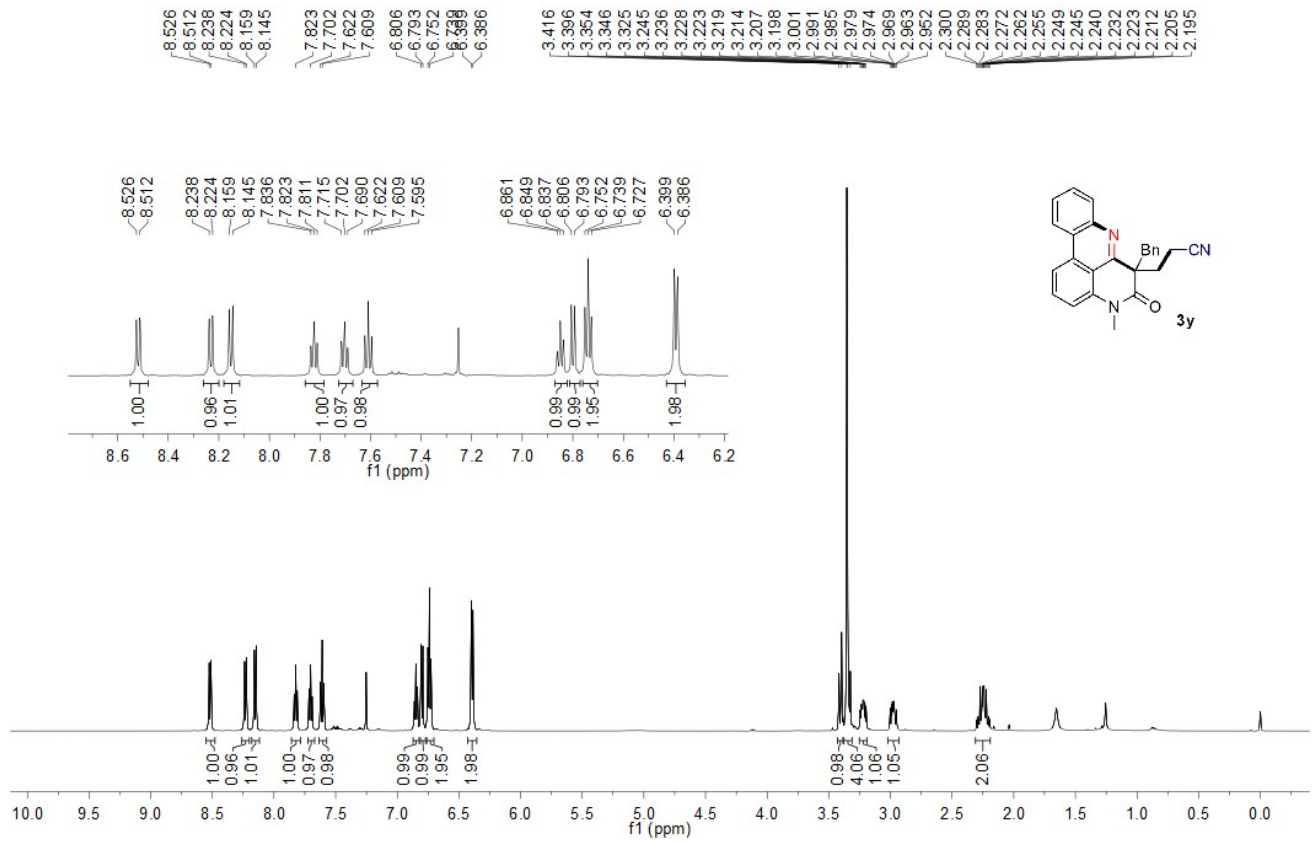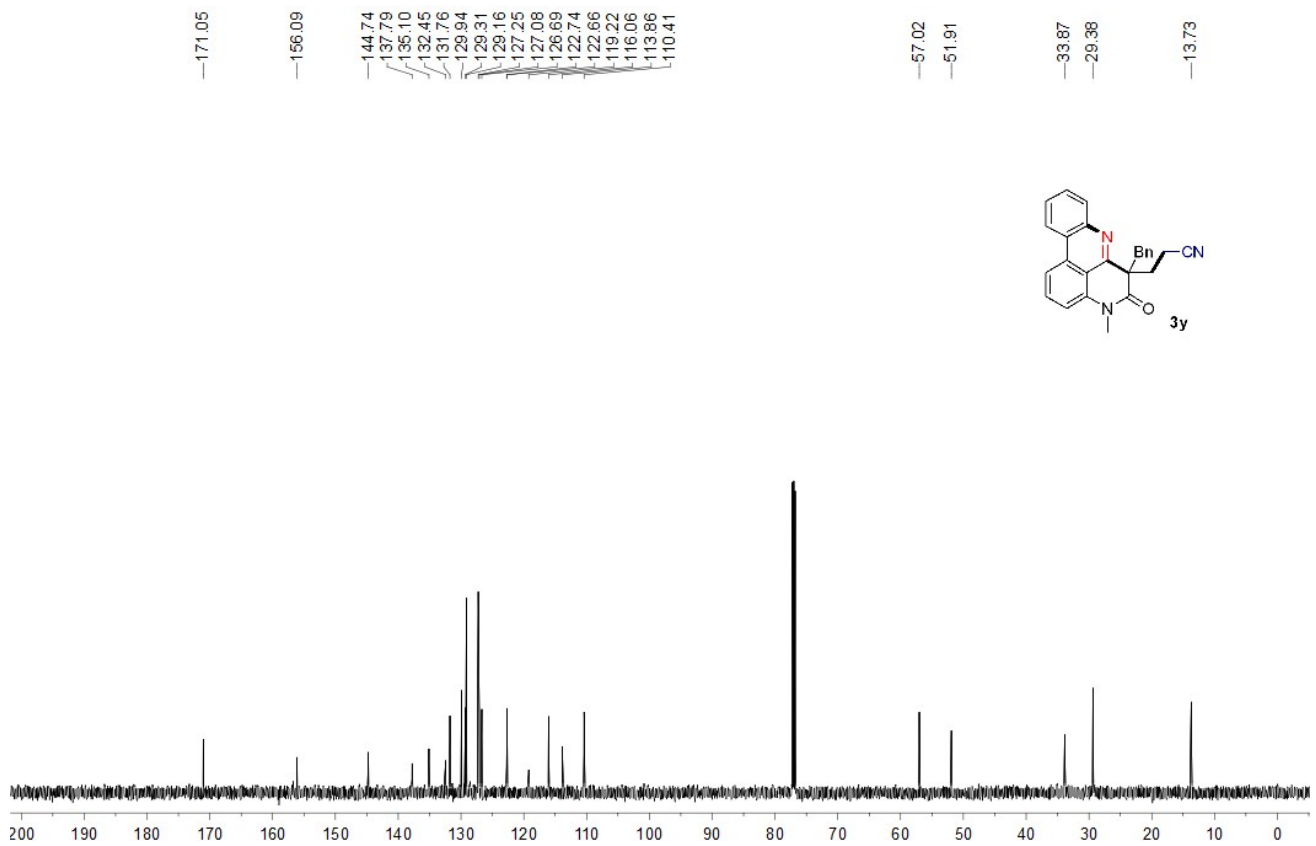

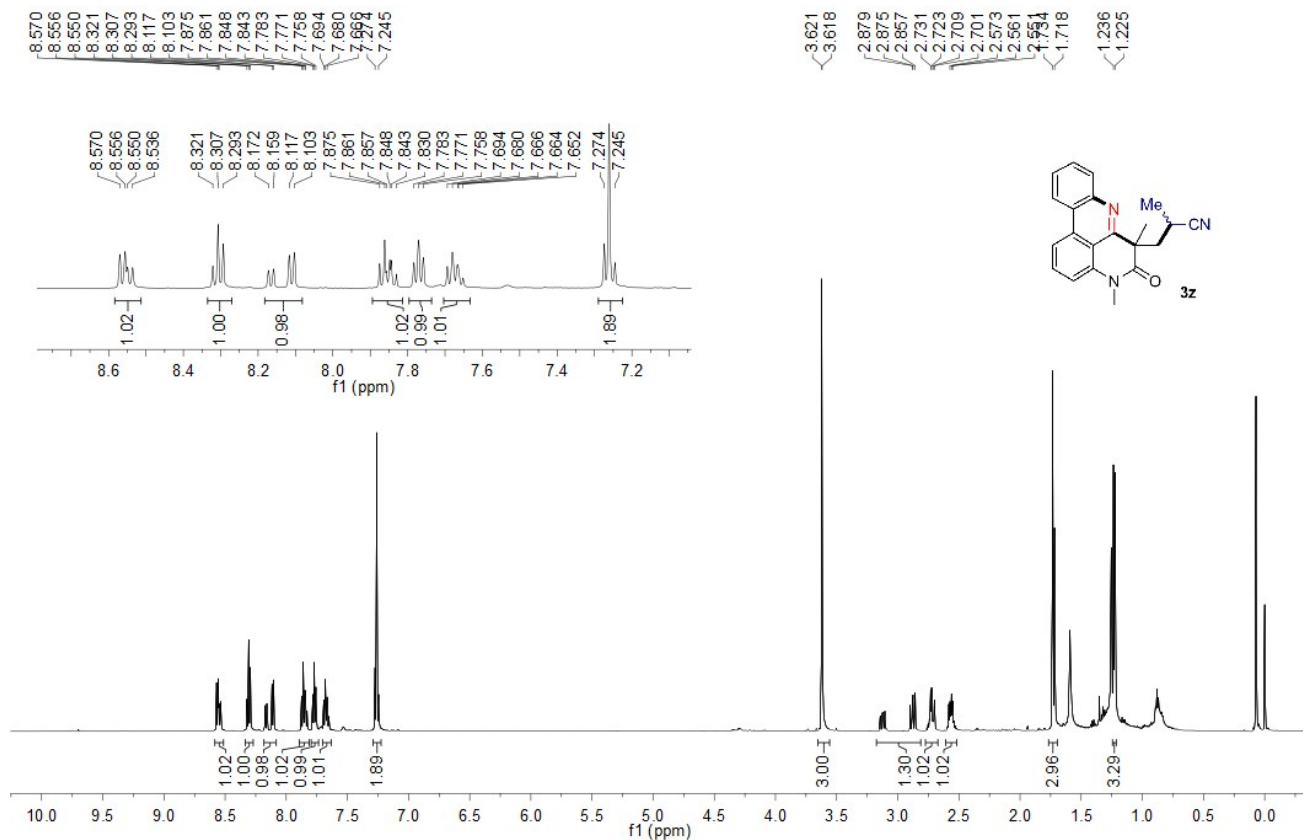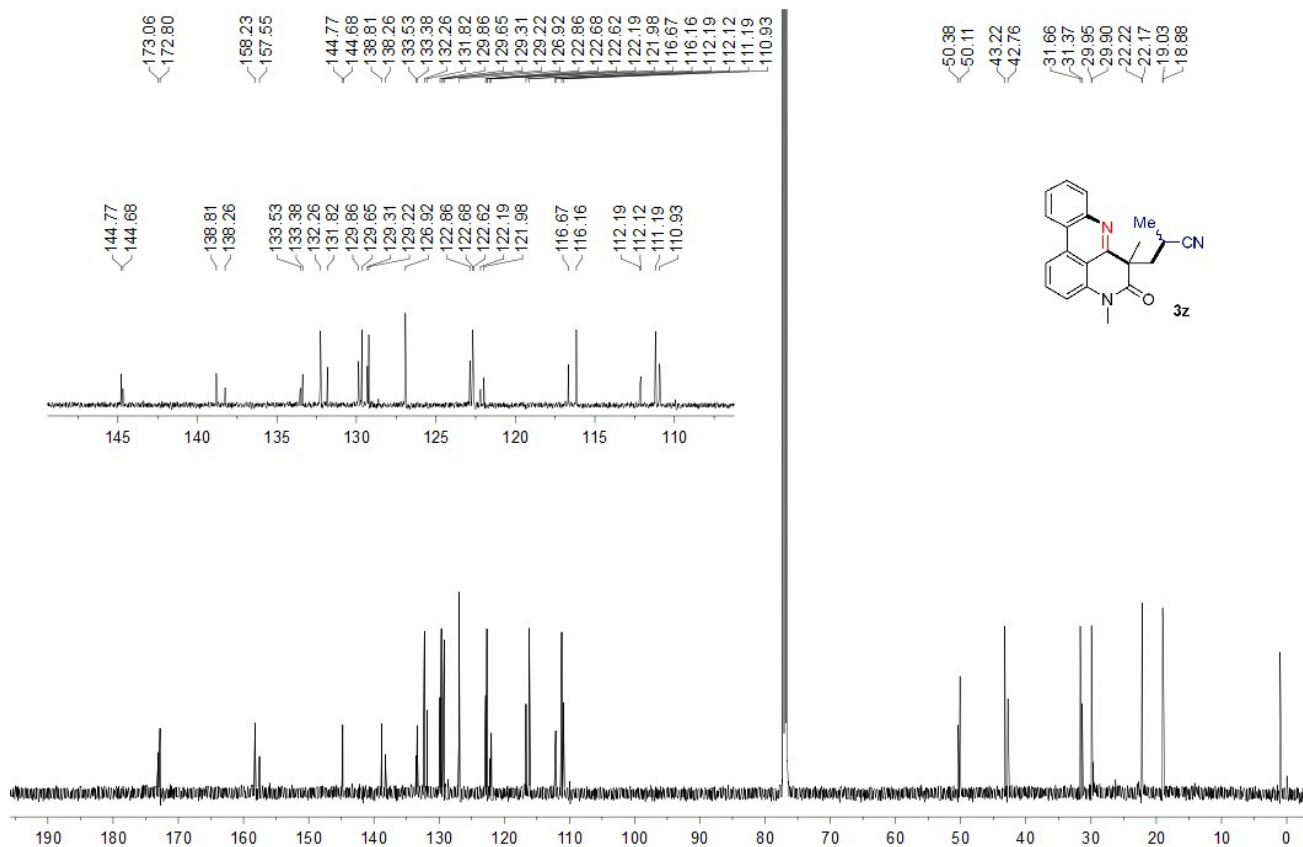

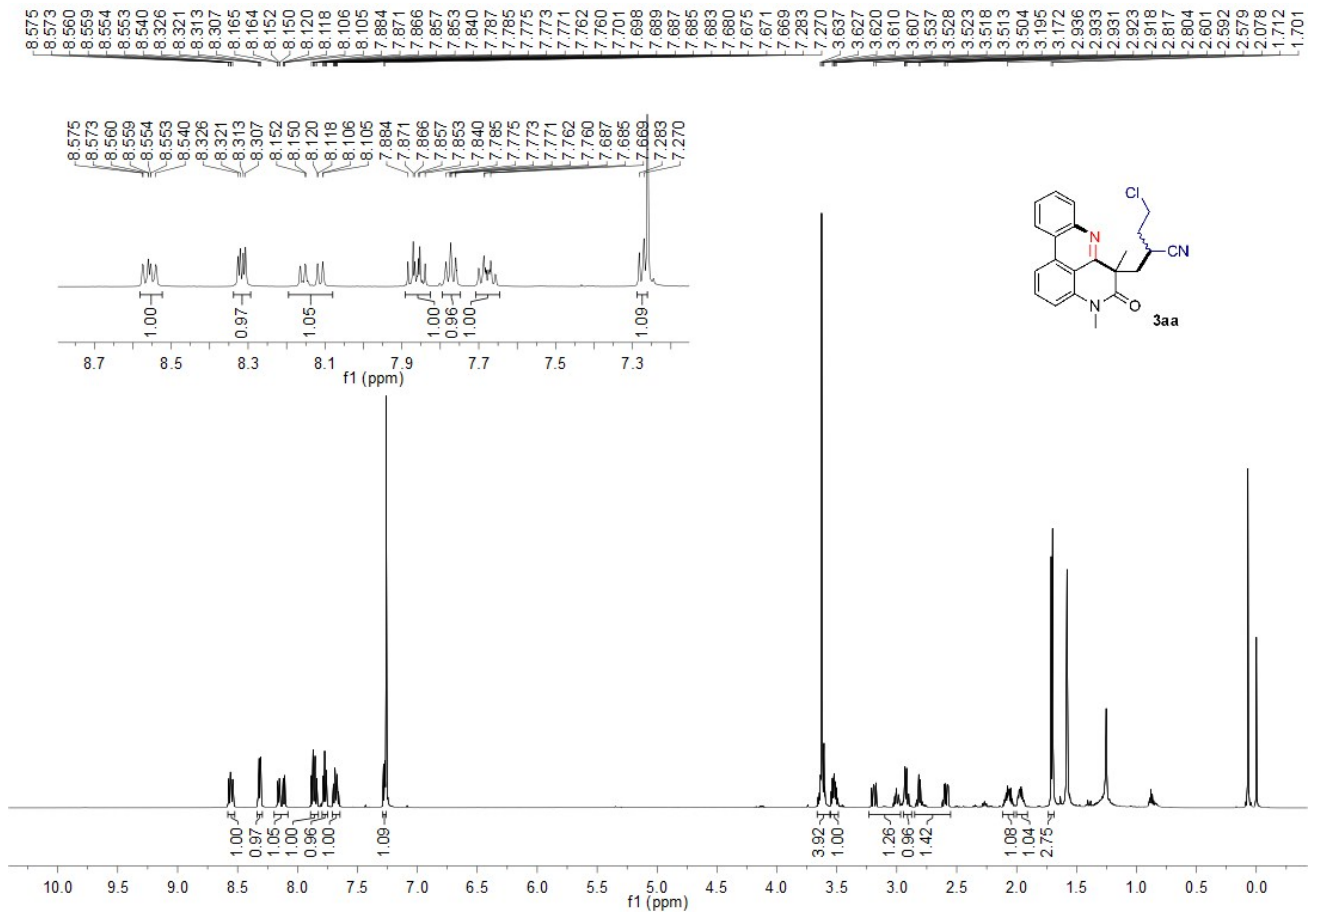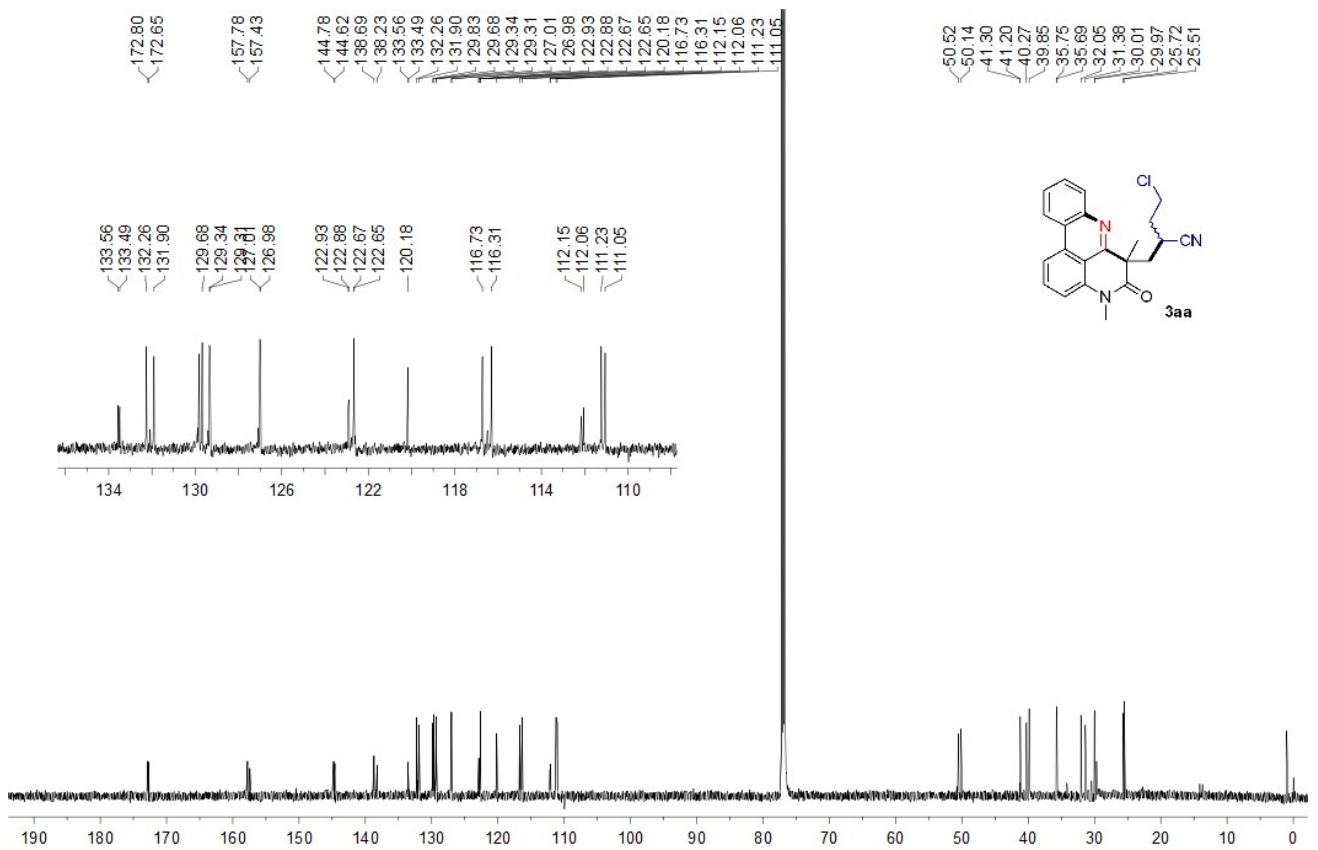

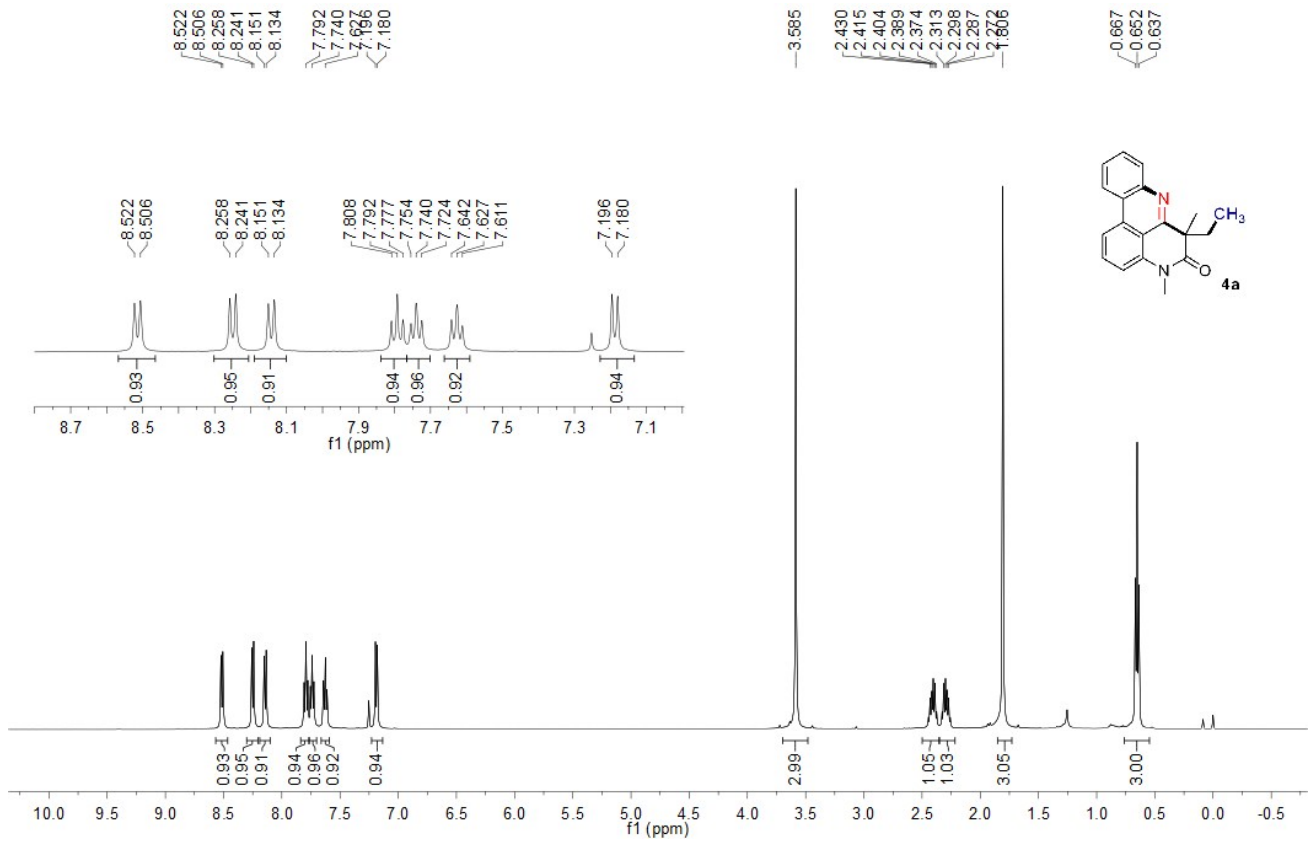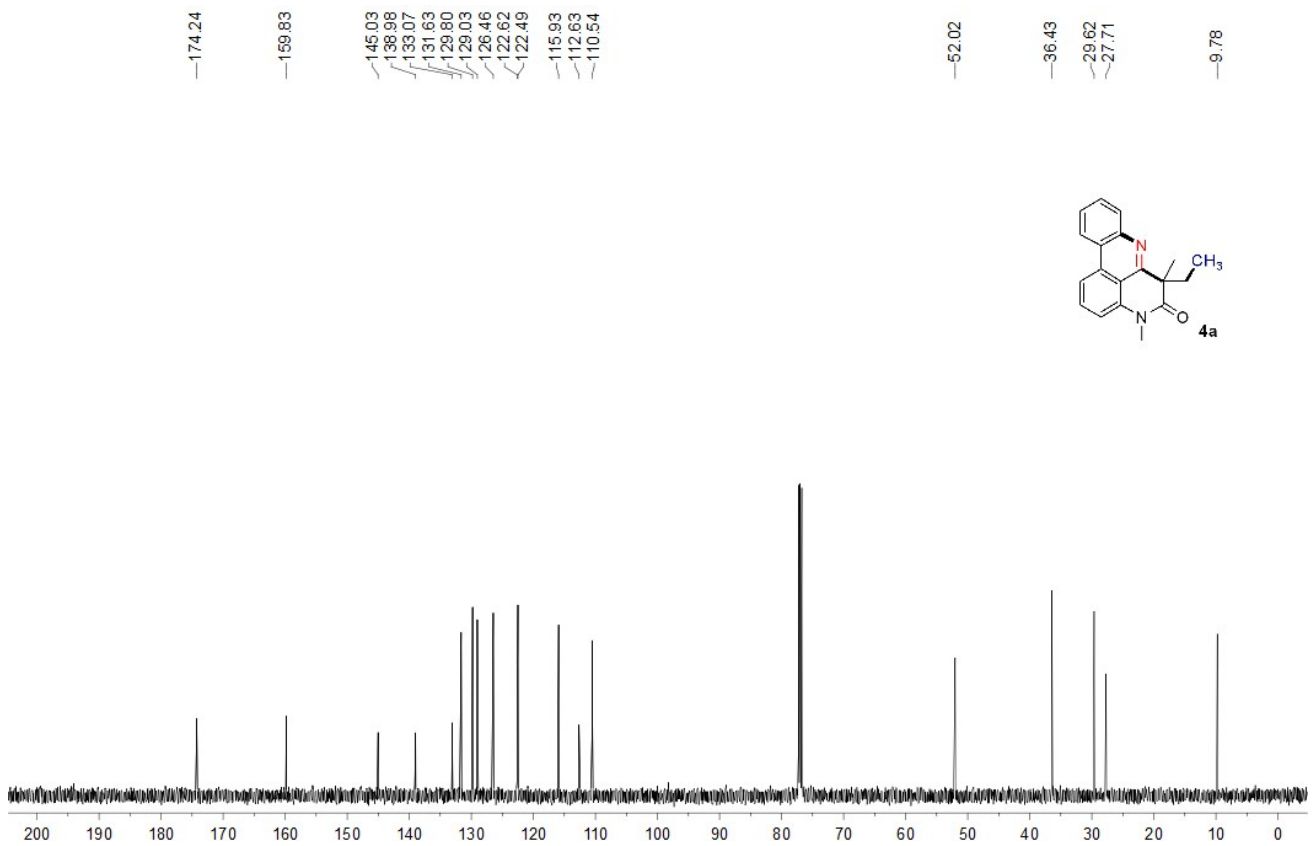

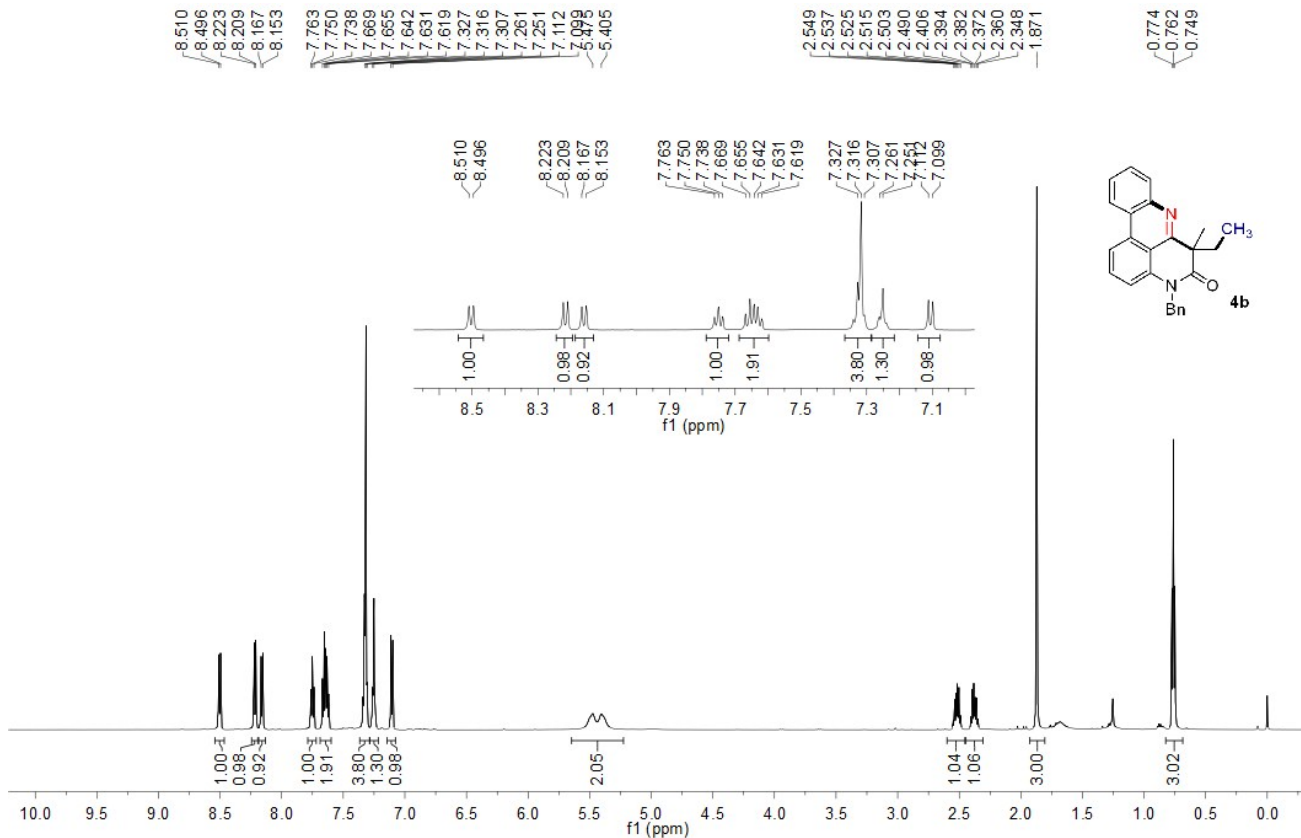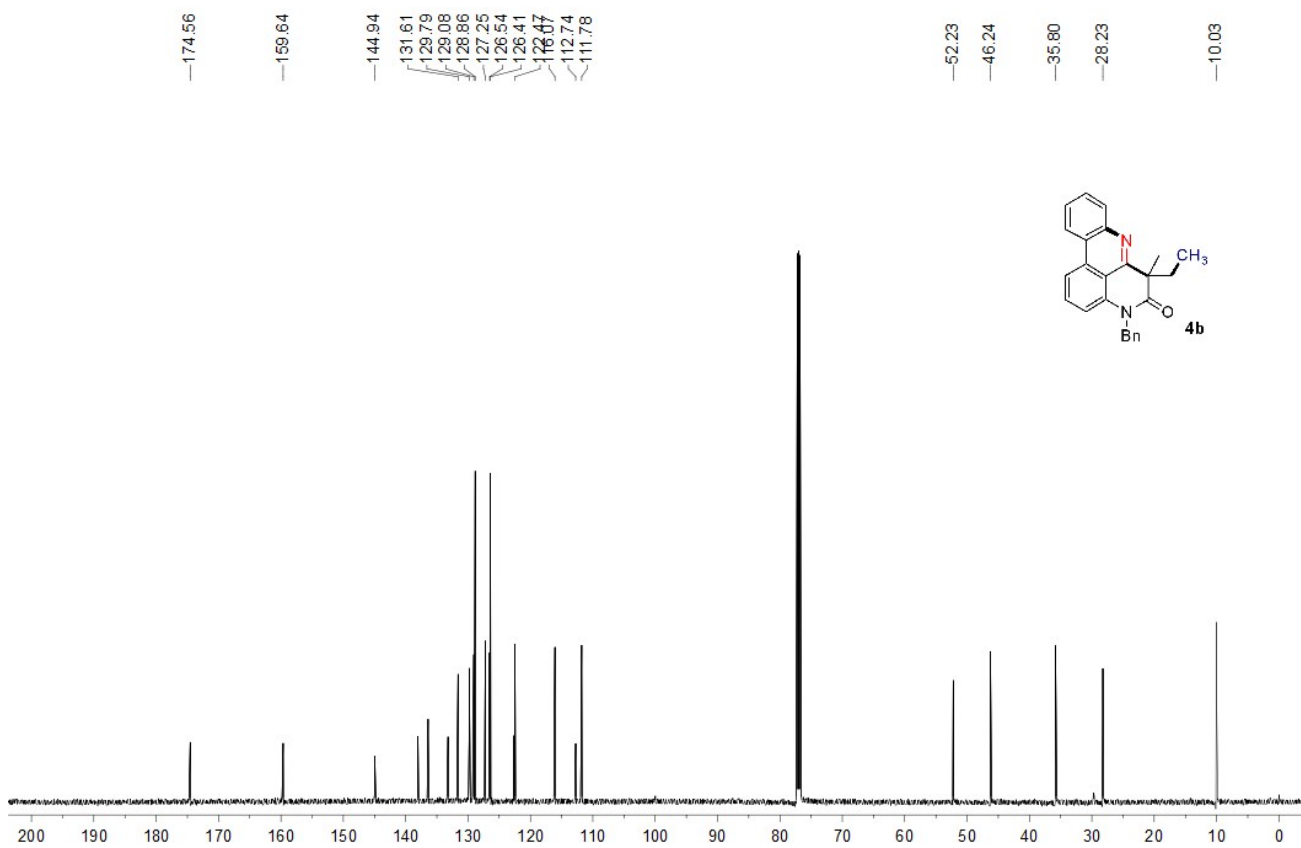

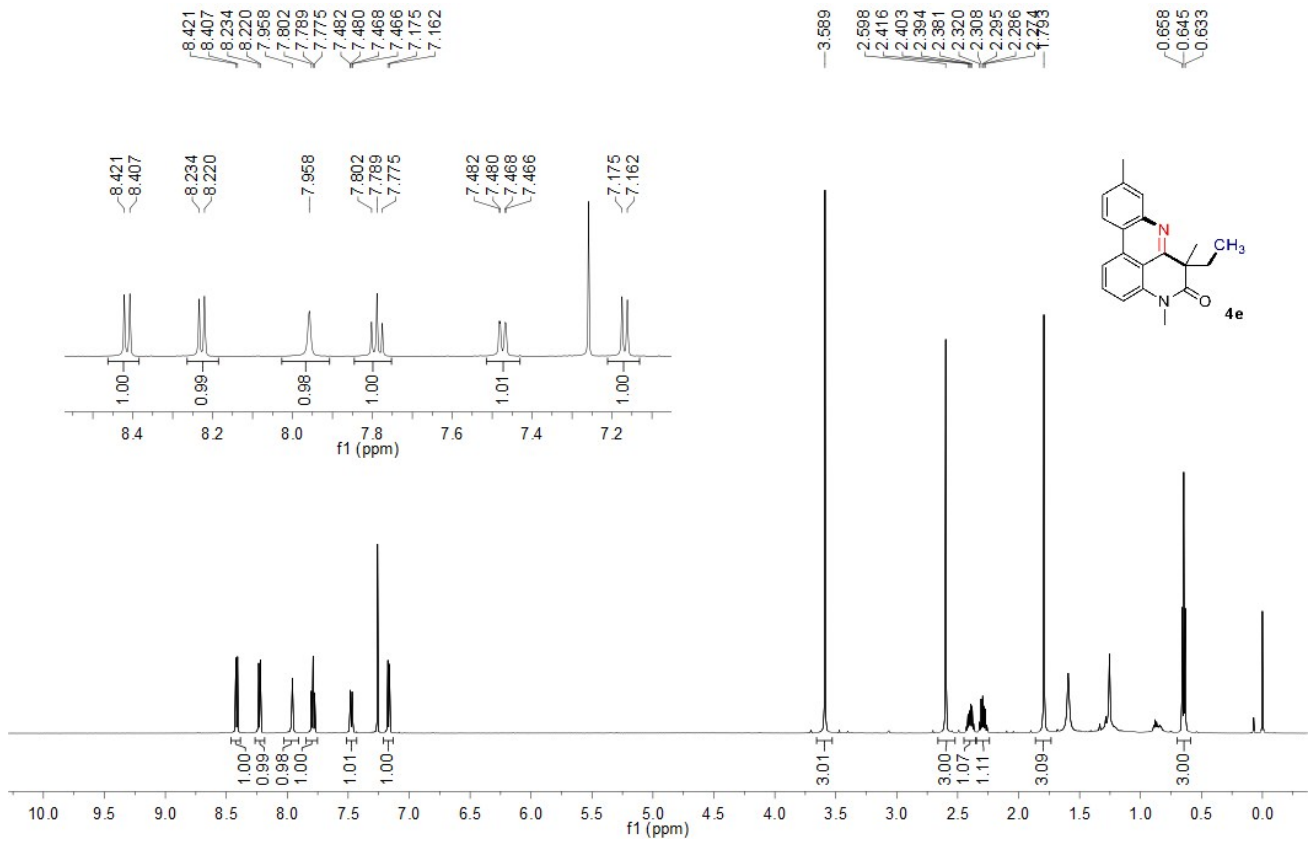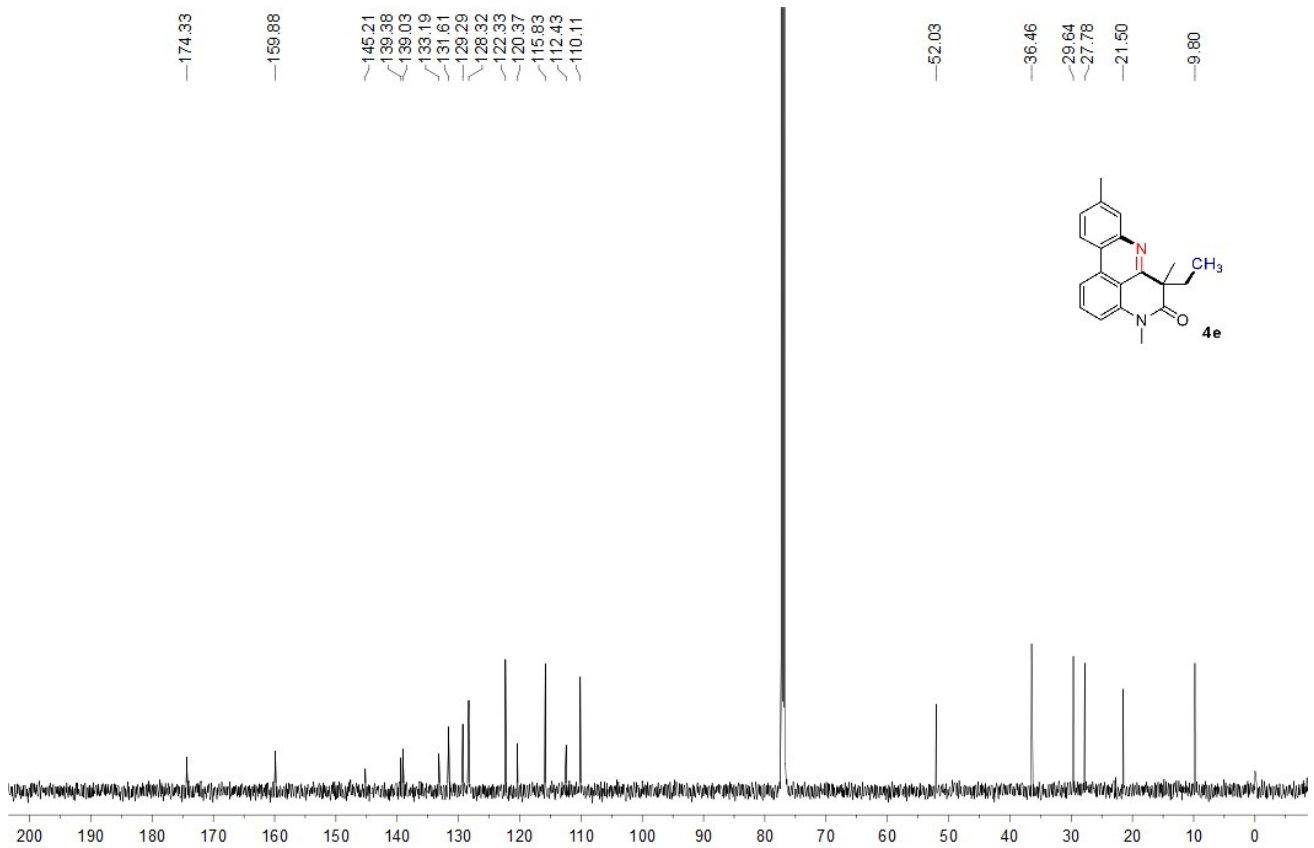



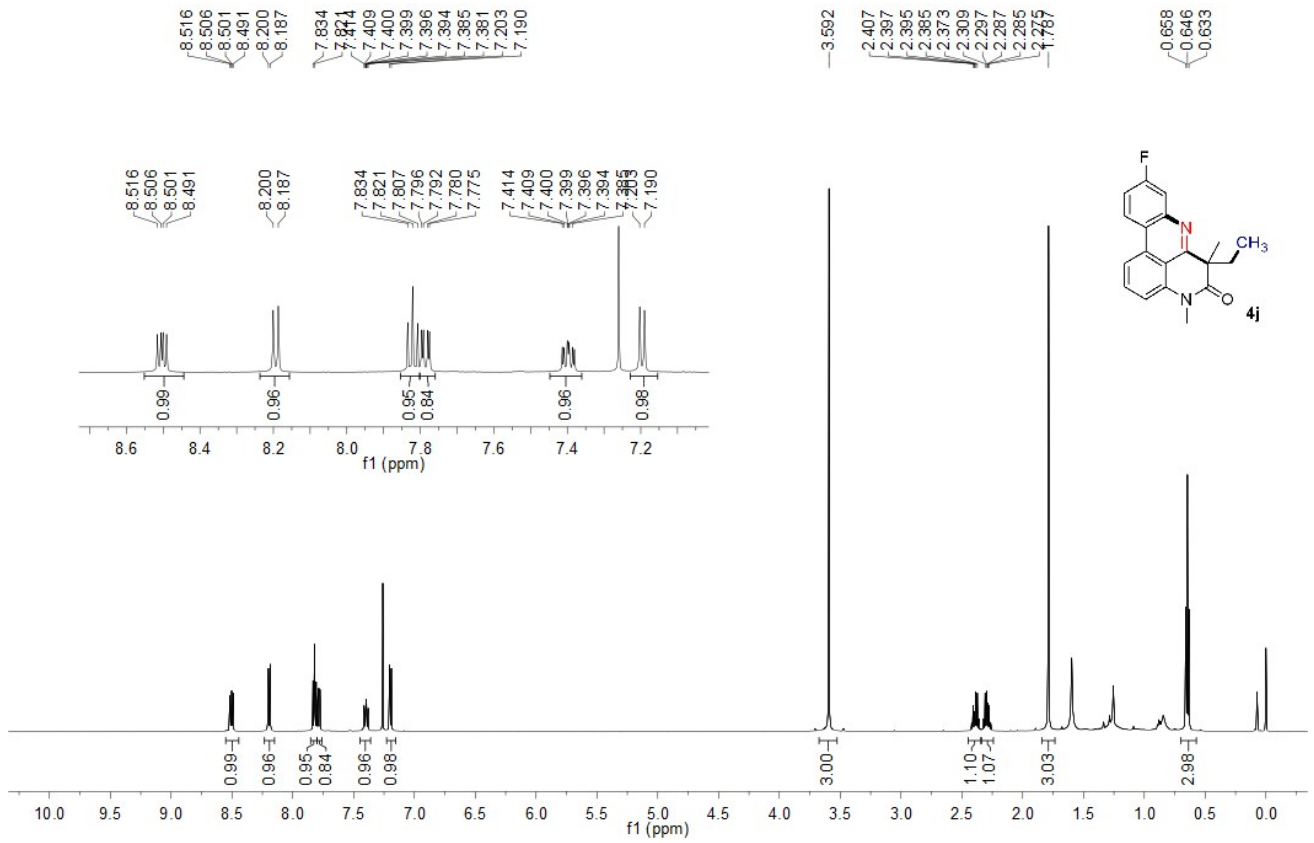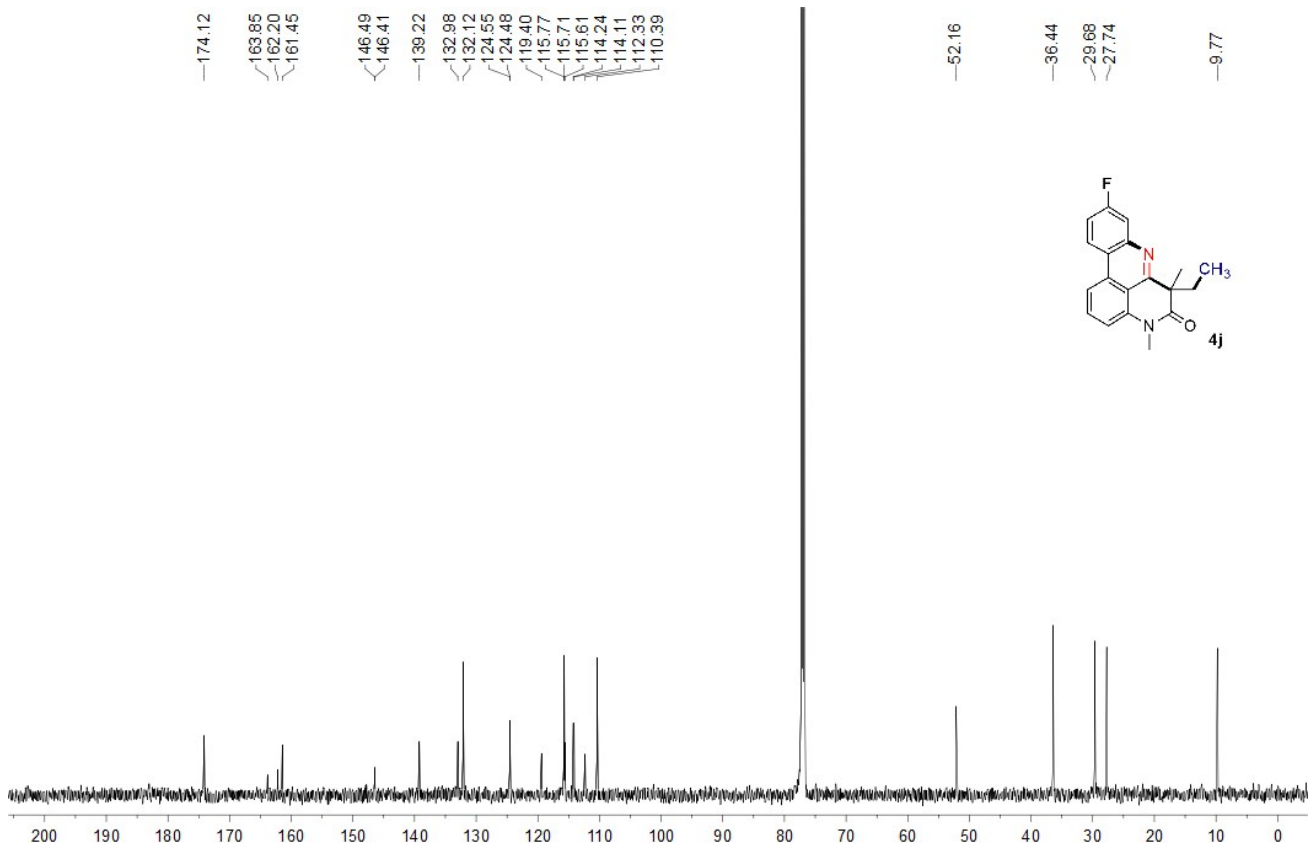

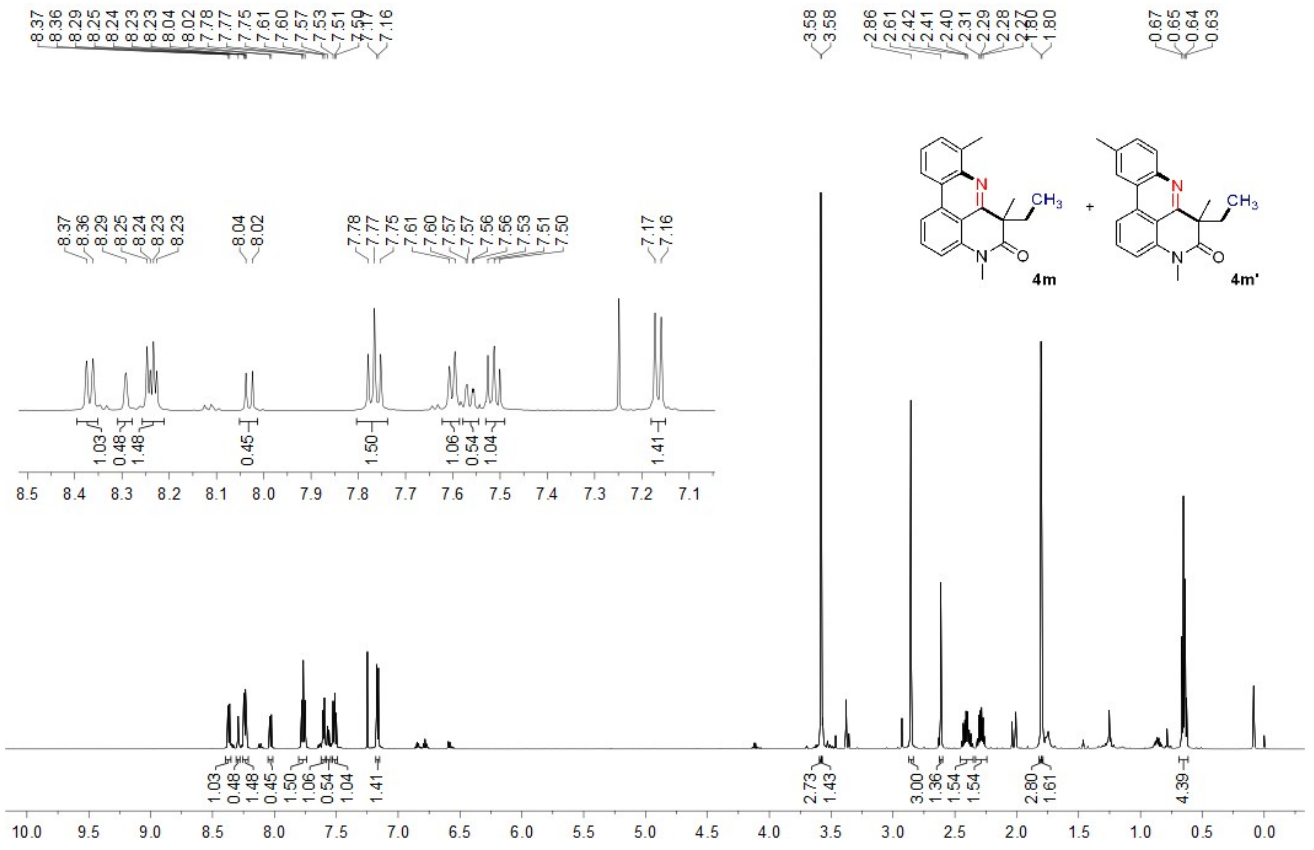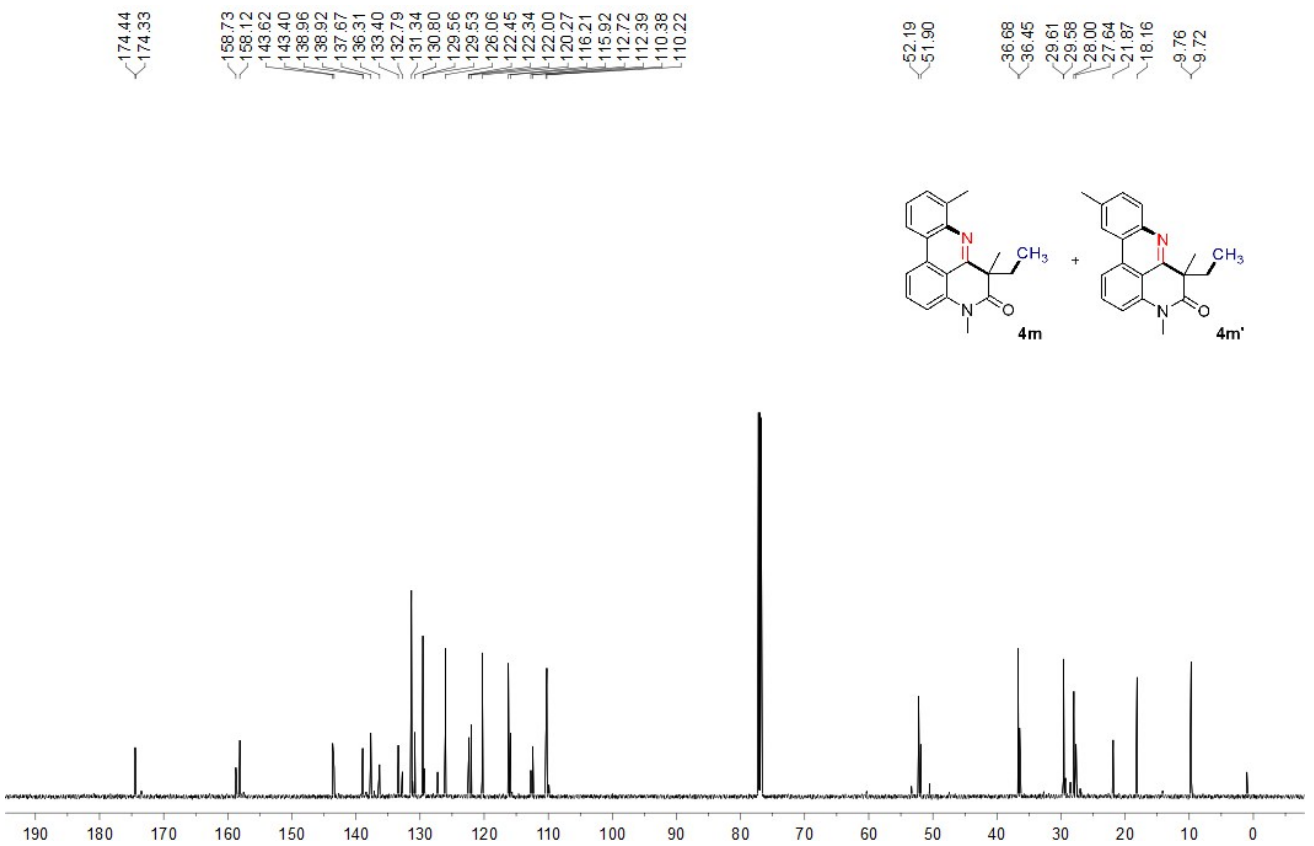



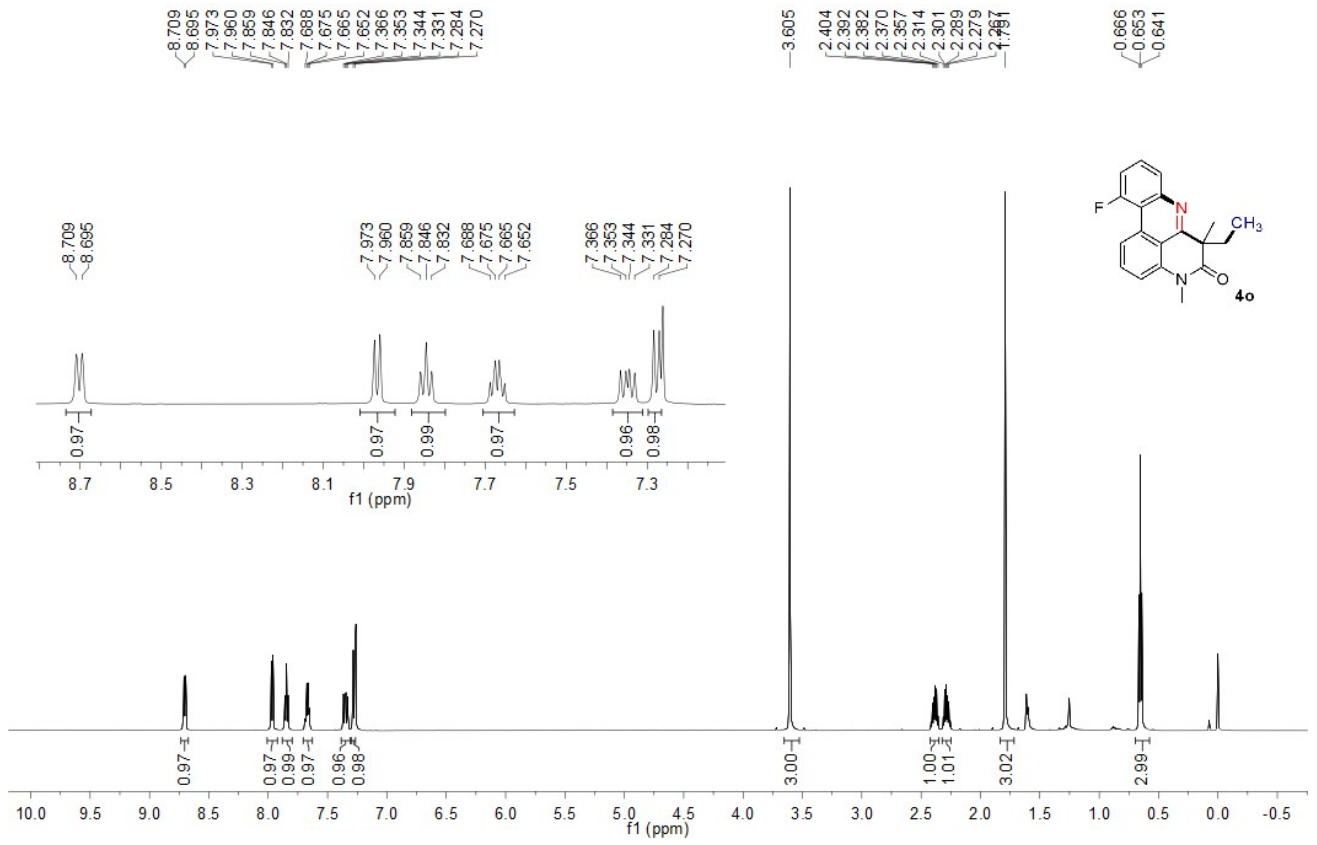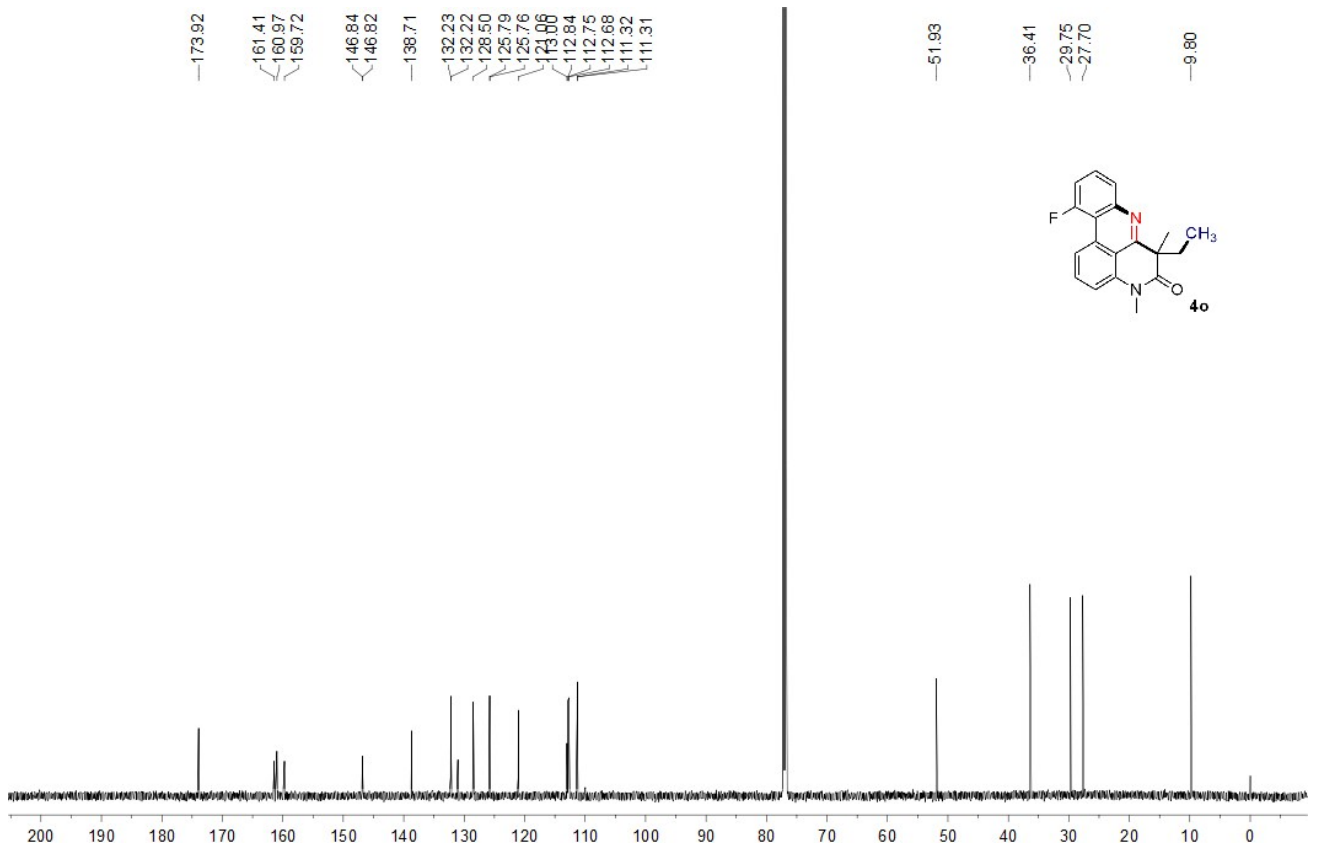

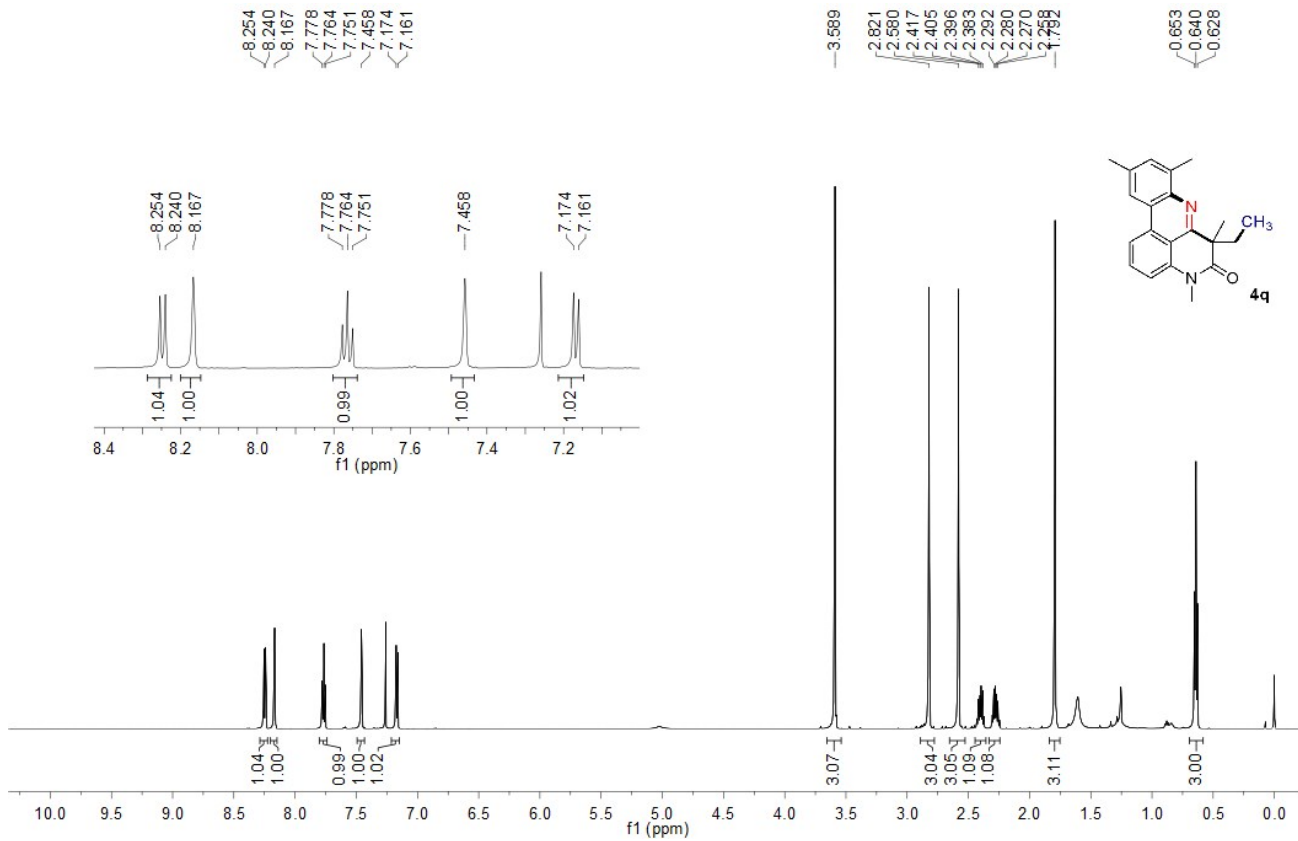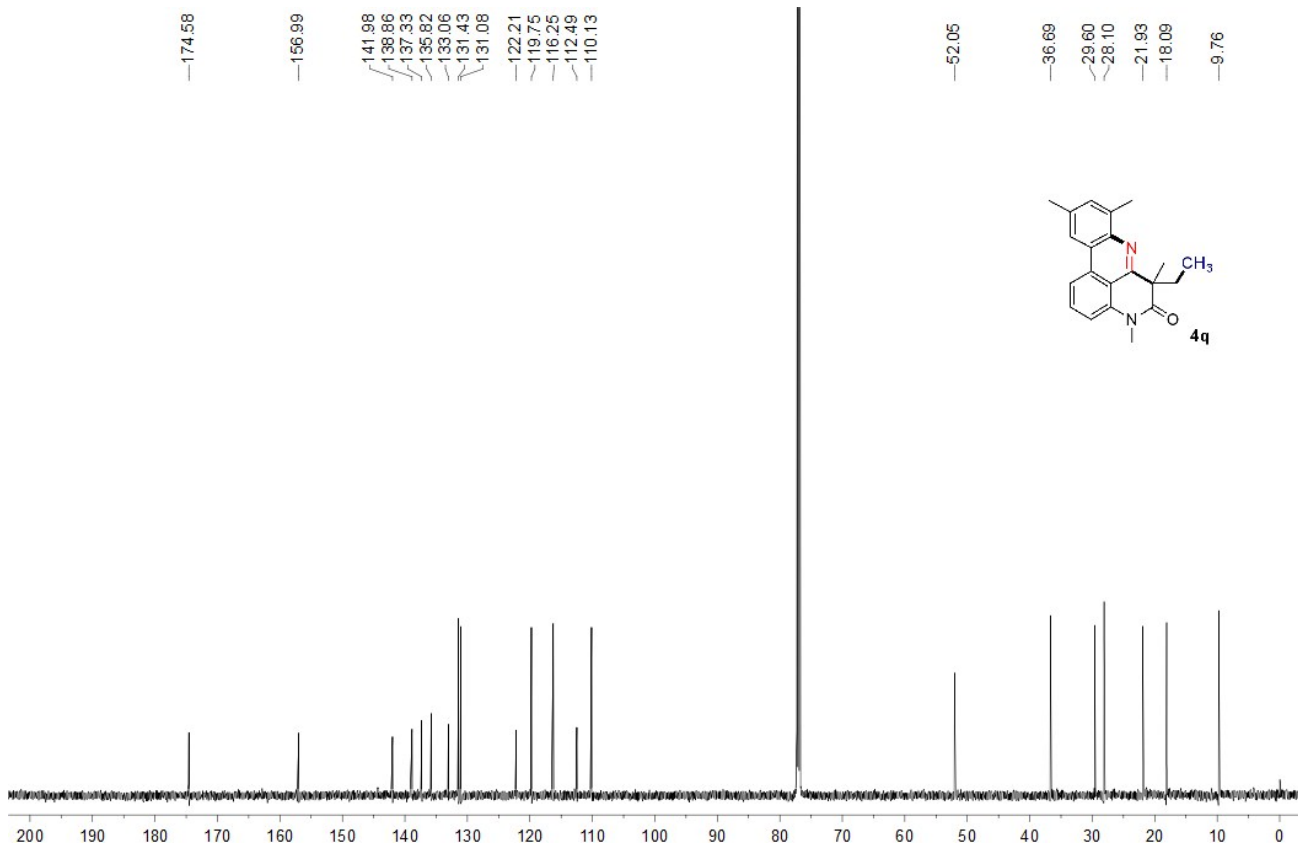

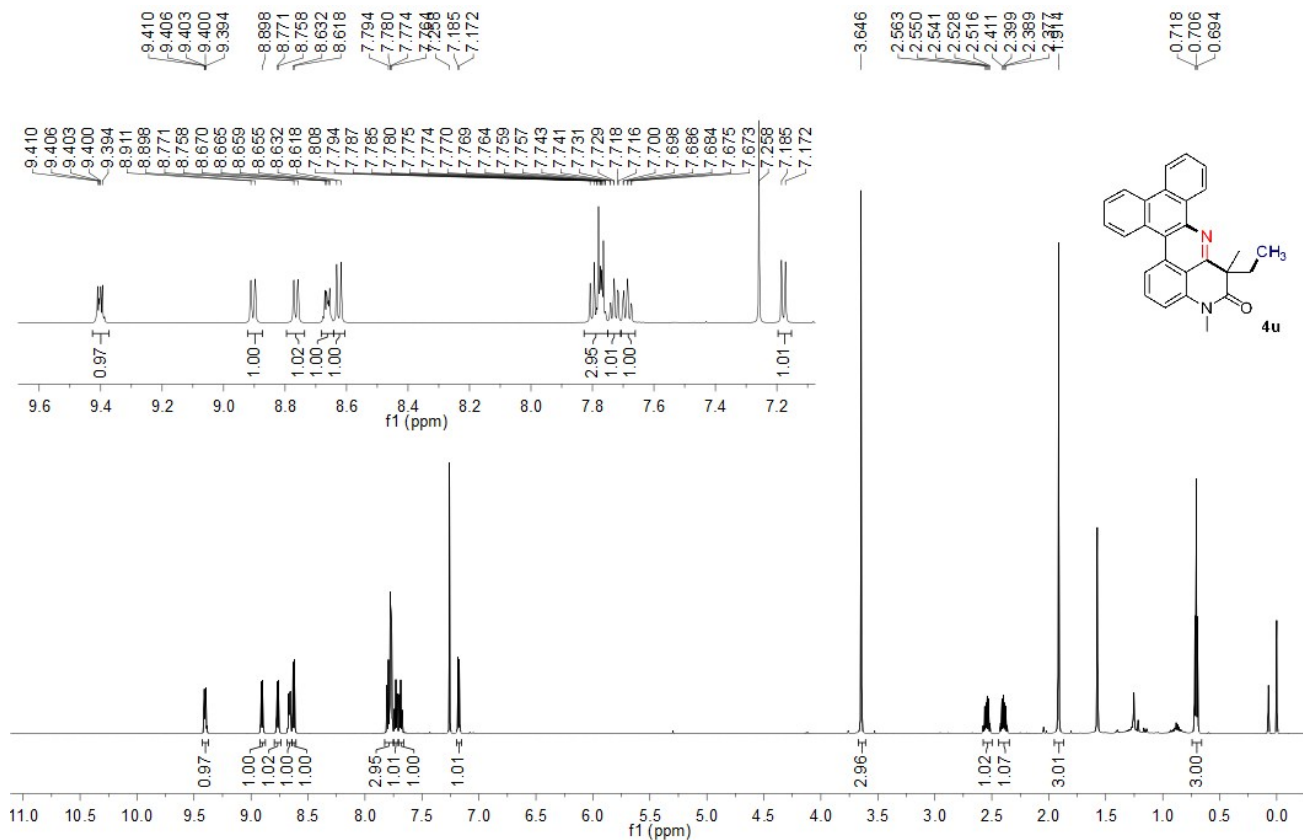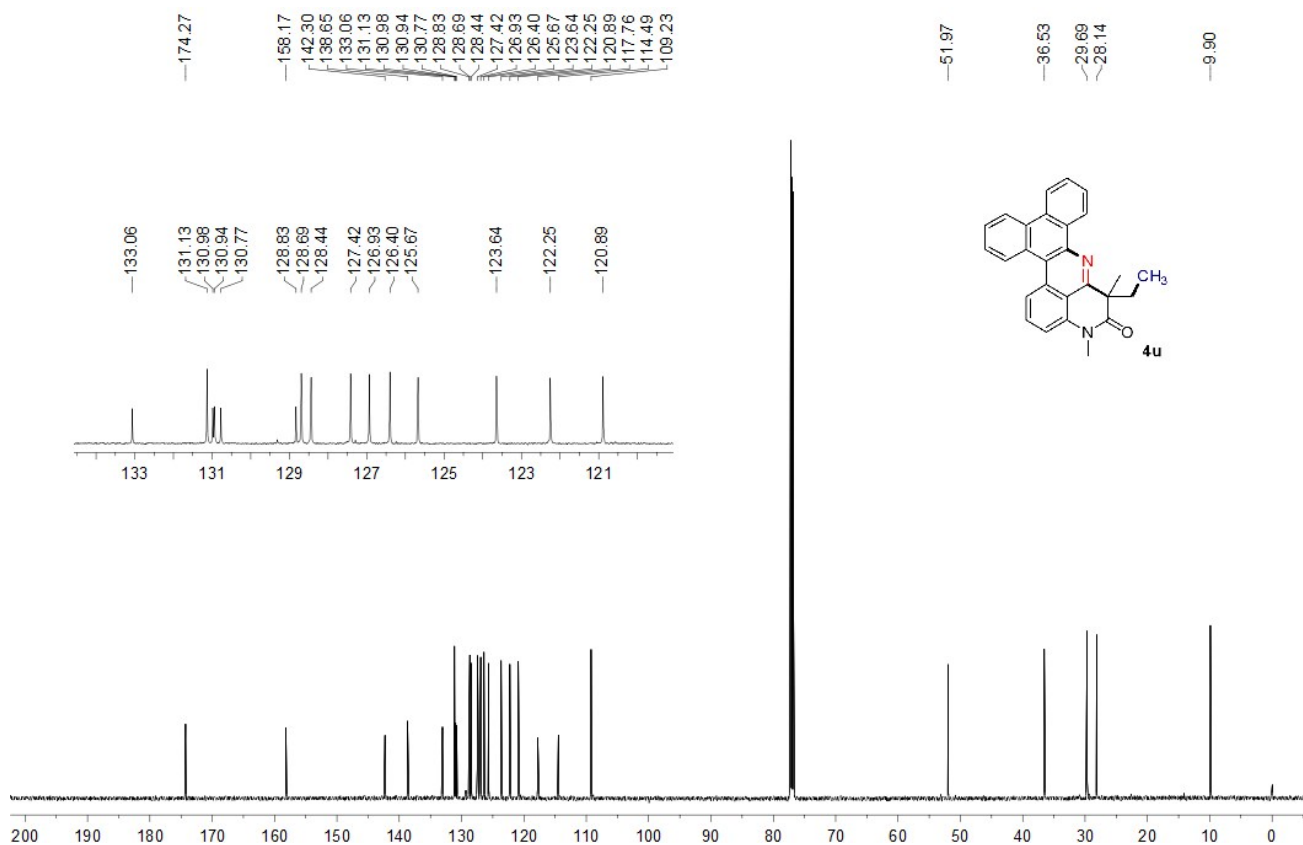

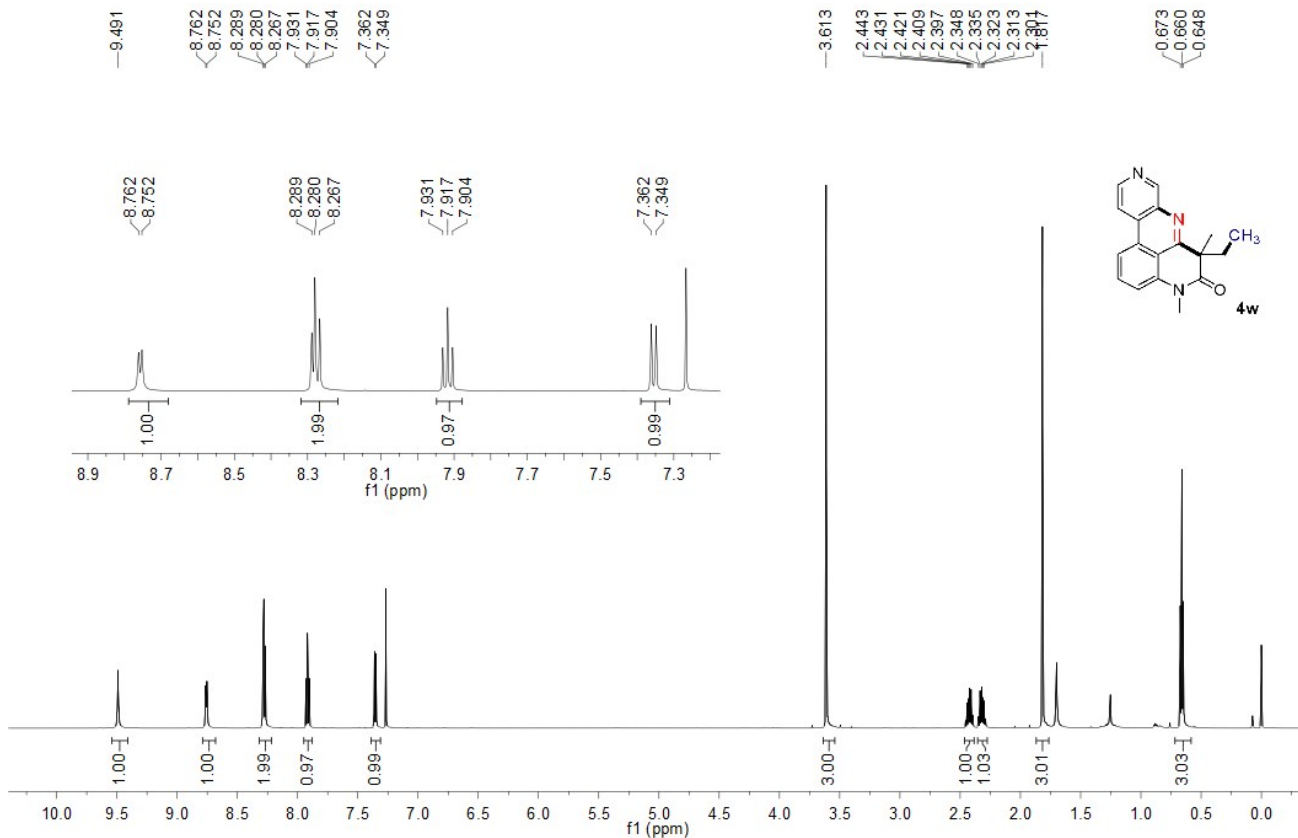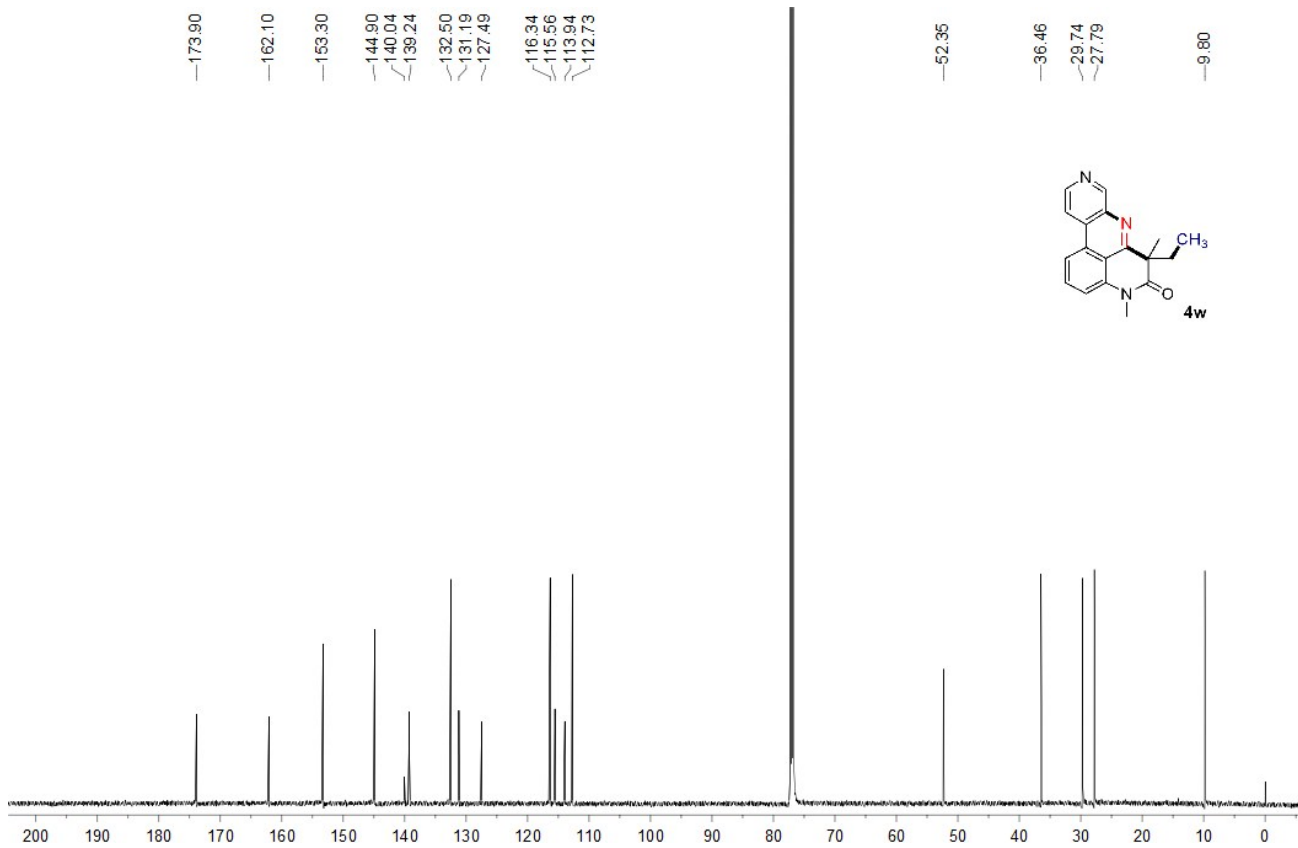

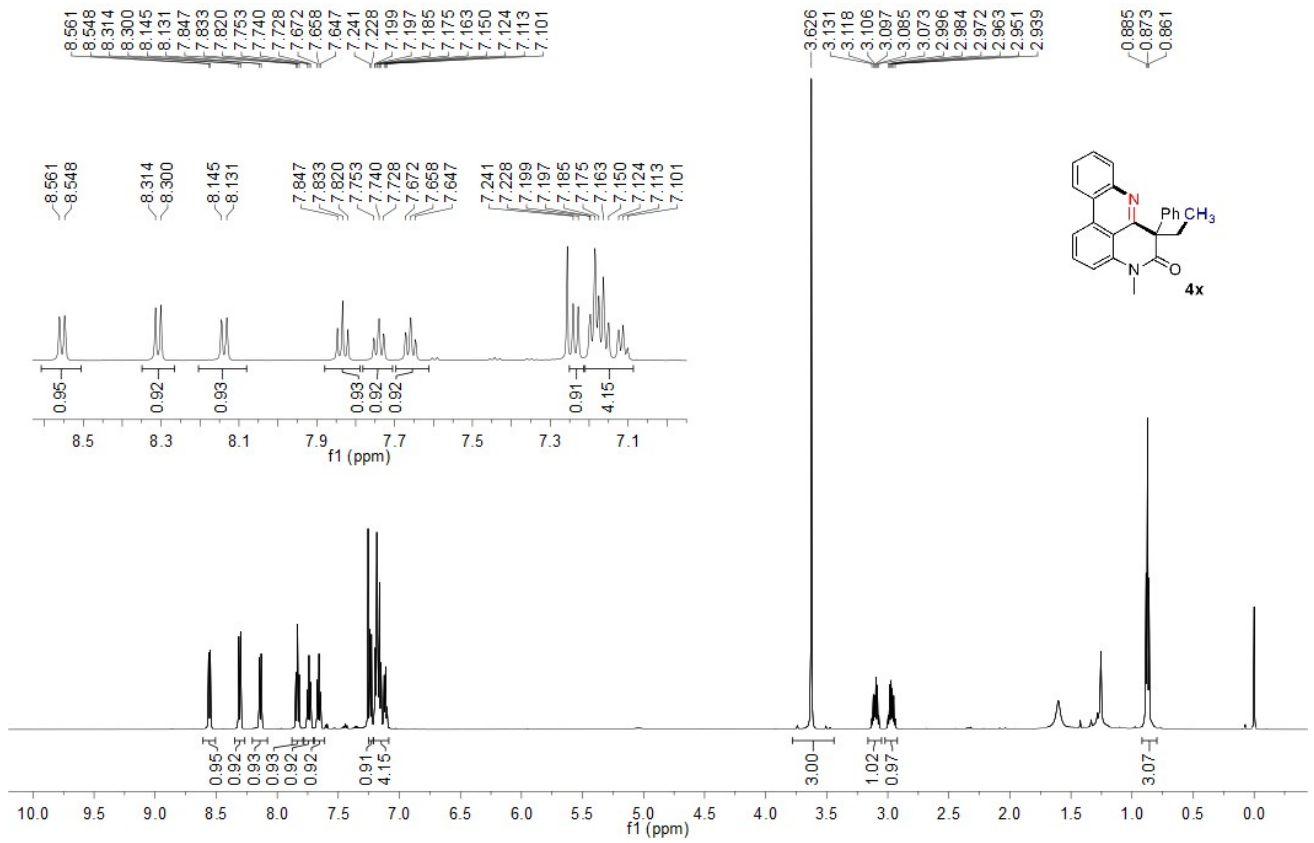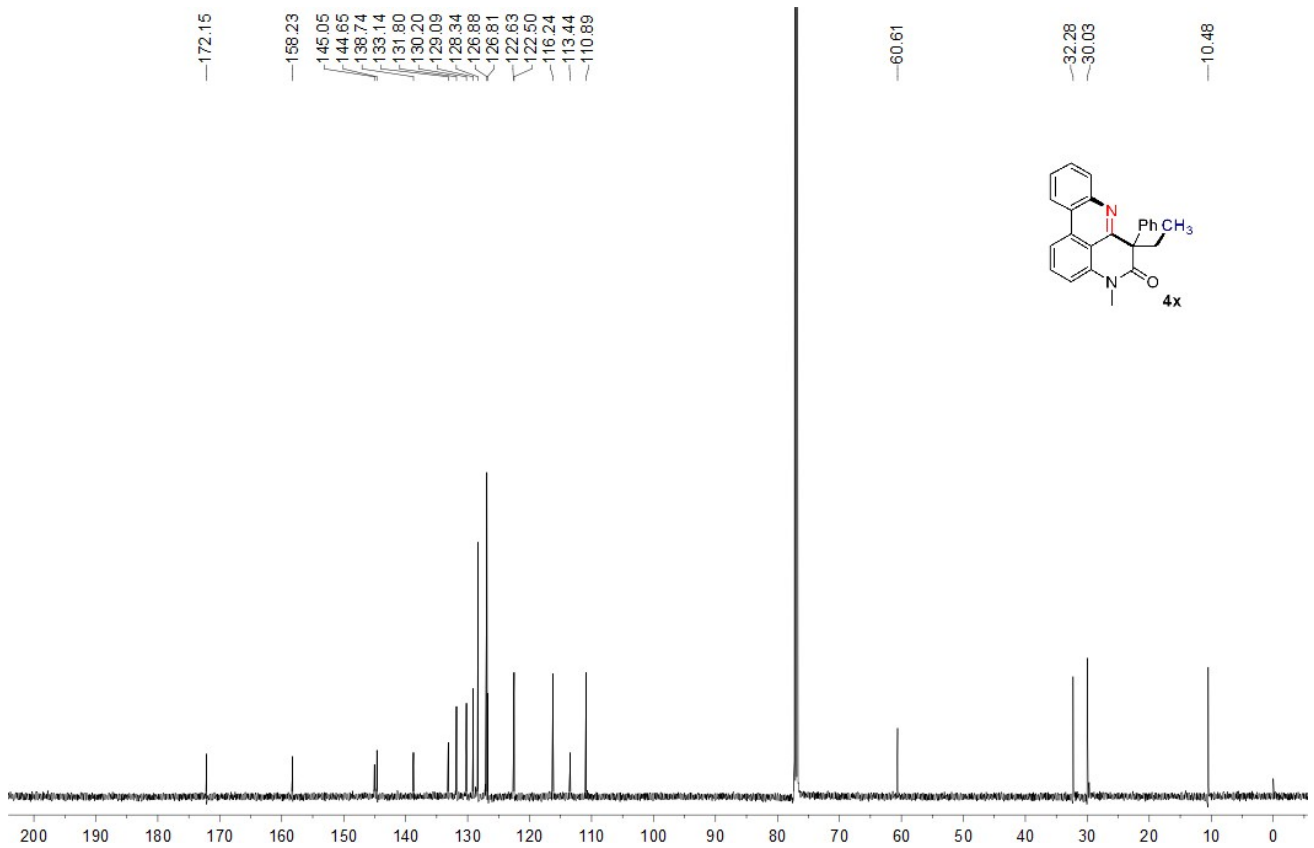

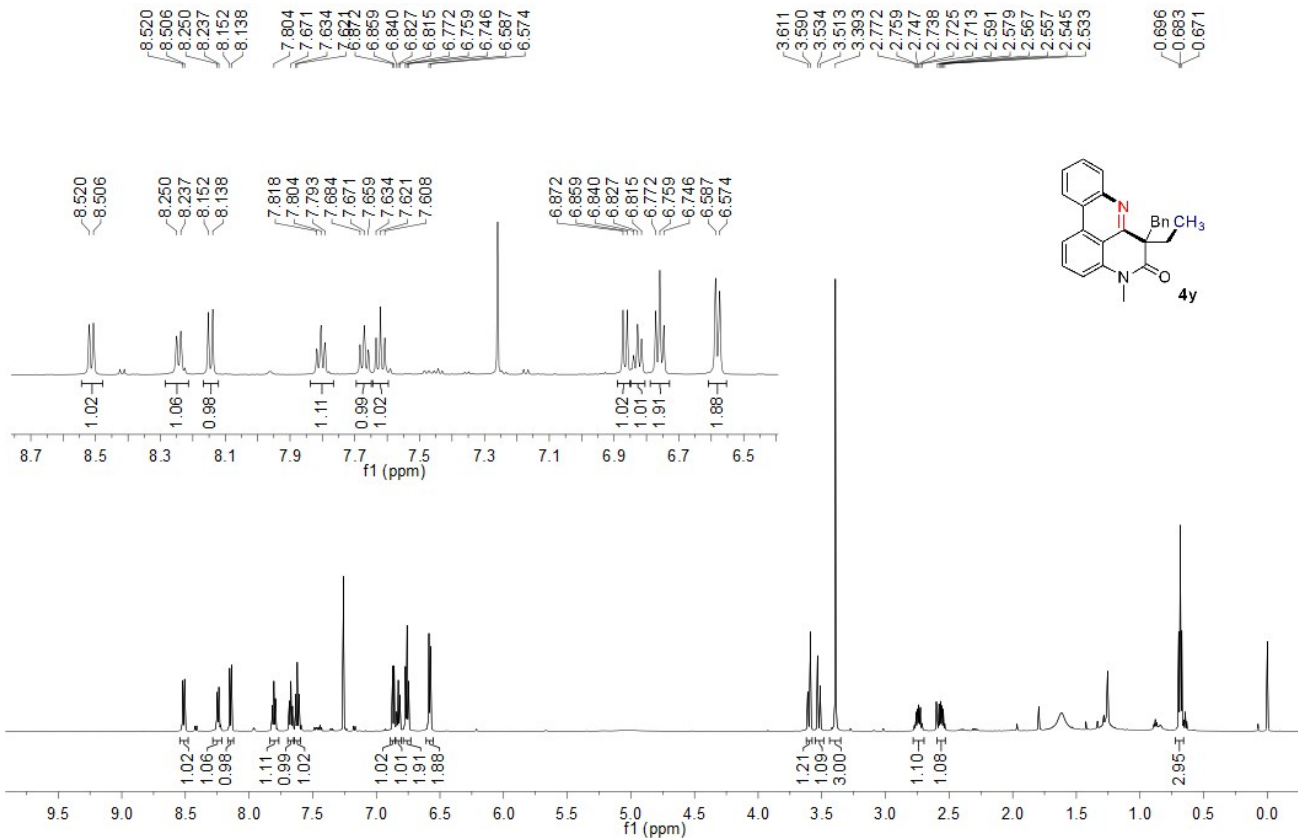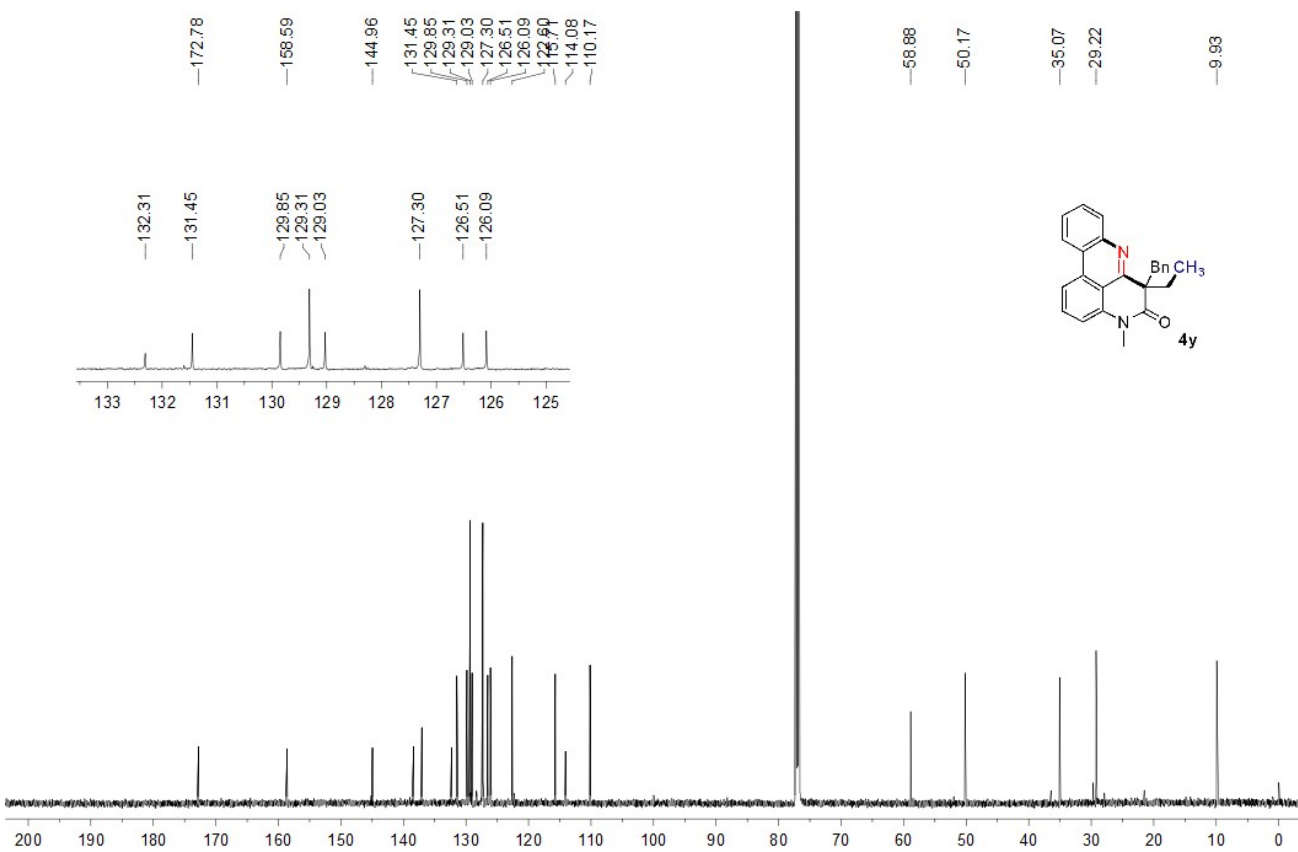

Supplement: c8qo00336j1.pdf [file c8qo00336j1.pdf]
